# Supplementary material for: Screening‐Level Estimates of Environmental Release Rates, Predicted Exposures, and Toxic Pressures of Currently Used Chemicals
Source: PubMed Central journal article supplement — Environ Toxicol Chem. 2020 Jul 31;39(9):1839–51. doi: 10.1002/etc.4801 (PMC7496123; doi:10.1002/etc.4801), 2020-07-31
Supplement: ETC-39-1839-s001.pdf [file ETC-39-1839-s001.pdf]

**Table SI-1. Fractions of EU tonnages released in specific Environmental Release Categories, spERC (Cefic, 2012)**

| SPERC # | SPERC Name             | Glossary text                                                                                                                                                                                                                       | Release fraction to air | Release fraction to waste water | Release fraction to soil |
|---------|------------------------|-------------------------------------------------------------------------------------------------------------------------------------------------------------------------------------------------------------------------------------|-------------------------|---------------------------------|--------------------------|
| 1       | AISE SPERC 2.1.a.v1    | AISE SPERC 2.1.a.v1 - AISE 1 - Formulation of Detergents/Maintenance Products: Granular Detergent -Regular (large scale)                                                                                                            | 2.0E-04                 | 1.0E-04                         | 0.0E+00                  |
| 2       | AISE SPERC 2.1.b.v1    | AISE SPERC 2.1.b.v1 - AISE 2 - Formulation of Detergents/Maintenance Products: Granular Detergent -Regular (medium scale)                                                                                                           | 2.0E-04                 | 1.0E-03                         | 0.0E+00                  |
| 3       | AISE SPERC 2.1.c.v1    | AISE SPERC 2.1.c.v1 - AISE 3 - Formulation of Detergents/Maintenance Products: Granular Detergent -Regular (small scale)                                                                                                            | 1.0E-02                 | 2.0E-03                         | 0.0E+00                  |
| 4       | AISE SPERC 2.1.g.v1    | AISE SPERC 2.1.g.v1 - AISE 7- Formulation of liquid Detergents/Maintenance Products: Low Viscosity (large scale)                                                                                                                    | 0.0E+00                 | 1.0E-04                         | 0.0E+00                  |
| 5       | AISE SPERC 2.1.h.v1    | AISE SPERC 2.1.h.v1 - AISE 8 - Formulation of liquid Detergents / Maintenance Products: Low Viscosity (medium scale)                                                                                                                | 0.0E+00                 | 1.0E-03                         | 0.0E+00                  |
| 6       | AISE SPERC 2.1.i.v1    | AISE SPERC 2.1.i.v1 - AISE 9 - Formulation of liquid Detergents/Maintenance Products: Low Viscosity (small scale)                                                                                                                   | 0.0E+00                 | 2.0E-03                         | 0.0E+00                  |
| 7       | AISE SPERC 2.1.j.v1    | AISE SPERC 2.1.j.v1 - AISE 10 - Formulation of liquid Detergents/Maintenance Products: High Viscosity (large scale)                                                                                                                 | 0.0E+00                 | 1.0E-03                         | 0.0E+00                  |
| 8       | AISE SPERC 2.1.k.v1    | AISE SPERC 2.1.k.v1 - AISE 11 - Formulation of liquid Detergents/Maintenance Products: High Low Viscosity (medium scale)                                                                                                            | 0.0E+00                 | 2.0E-03                         | 0.0E+00                  |
| 9       | AISE SPERC 2.1.l.v1    | AISE SPERC 2.1.l.v1 - AISE 12 - Formulation of liquid Detergents/Maintenance Products: High Viscosity (small scale)                                                                                                                 | 0.0E+00                 | 4.0E-03                         | 0.0E+00                  |
| 10      | AISE SPERC 4.1.v1      | AISE SPERC 4.1.v1 - AISE 13 - Industrial Use of Water Borne Processing Aids - no RMM                                                                                                                                                | 0.0E+00                 | 1.0E+00                         | 0.0E+00                  |
| 11      | AISE SPERC 5.1a.v1     | AISE SPERC 5.1a.v1 - AISE 14 - Industrial Use of Me-salts in conversion coating - Nickel                                                                                                                                            | 0.0E+00                 | 5.0E-02                         | 0.0E+00                  |
| 12      | AISE SPERC 5.1b.v1     | AISE SPERC 5.1b.v1 - AISE 15 - Industrial Use of Me-salts in conversion coating - Zinc, Chromium, Copper, Manganese                                                                                                                 | 0.0E+00                 | 1.0E-02                         | 0.0E+00                  |
| 13      | AISE SPERC 8a.1.a.v1   | AISE SPERC 8a.1.a.v1 - AISE 16 - Wide Dispersive Use in 'Down the Drain' cleaning and maintenance products (Consumers and Professionals)                                                                                            | 0.0E+00                 | 1.0E+00                         | 0.0E+00                  |
| 14      | AISE SPERC 8a.1.b.v1   | AISE SPERC 8a.1.a.v1 - AISE 17 - Wide Dispersive Use in Aerosol products for cleaning and maintenance products (Non-Propellants)                                                                                                    | 0.0E+00                 | 1.0E+00                         | 0.0E+00                  |
| 15      | AISE SPERC 8a.1.c.v1   | AISE SPERC 8a.1.a.v1 - AISE 18 - Wide Dispersive Use in Aerosol products for cleaning and maintenance products (Propellants)                                                                                                        | 1.0E+00                 | 0.0E+00                         | 0.0E+00                  |
| 16      | CEPE SPERC 2.1a.v1     | CEPE SPERC 2.1a.v1 - CEPE 1 - Formulation of Organic Solvent Borne Coatings and Inks - Large Scale (>100 tpa solvent use) - VOC                                                                                                     | 6.0E-03                 | 0.0E+00                         | 0.0E+00                  |
| 17      | CEPE SPERC 2.1b.v1     | CEPE SPERC 2.1b.v1 - CEPE 2 - Formulation of Organic Solvent Borne Coatings and Inks - Small Scale (<100 tpa solvent use) - VOC                                                                                                     | 6.0E-03                 | 0.0E+00                         | 0.0E+00                  |
| 18      | CEPE SPERC 2.2a.v1     | CEPE SPERC 2.2a.v1 - CEPE 3 - Formulation of Organic Solvent Borne Coatings and Inks - Solids                                                                                                                                       | 9.7E-05                 | 5.0E-05                         | 0.0E+00                  |
| 19      | CEPE SPERC 2.1b2.v1    | CEPE SPERC 2.1b2.v1 - CEPE 4 - Formulation of Water Borne Coatings and Inks - Large Scale (>100 tpa solvent use) - VOC                                                                                                              | 4.0E-03                 | 0.0E+00                         | 0.0E+00                  |
| 20      | CEPE SPERC 2.1b3.v1    | CEPE SPERC 2.1b3.v1 - CEPE 5 - Formulation of Water Borne Coatings and Inks - Small Scale (<100 tpa solvent use) - VOC                                                                                                              | 4.0E-03                 | 0.0E+00                         | 0.0E+00                  |
| 21      | CEPE SPERC 2.1b4.v1    | CEPE SPERC 2.1b4.v1 - CEPE 6 - Formulation of Water Borne Coatings and Inks - Solids                                                                                                                                                | 9.7E-05                 | 5.0E-03                         | 0.0E+00                  |
| 22      | CEPE SPERC 2.1c.v1     | CEPE SPERC 2.1c.v1 - CEPE 7 - Formulation of Powder Coatings and Inks - Solids                                                                                                                                                      | 9.7E-05                 | 5.0E-03                         | 0.0E+00                  |
| 23      | CEPE SPERC 2.2a1.v1    | CEPE SPERC 2.2a1.v1 - CEPE 8 - Formulation of Liquid Coatings and Inks (where specific use not known) - Large Scale (>100 tpa solvent use) - VOC                                                                                    | 6.0E-03                 | 0.0E+00                         | 0.0E+00                  |
| 24      | CEPE SPERC 2.2a2.v1    | CEPE SPERC 2.2a2.v1 - CEPE 9 - Formulation of Liquid Coatings and Inks (where specific use not known) - Small Scale (<100 tpa solvent use) - VOC                                                                                    | 6.0E-03                 | 0.0E+00                         | 0.0E+00                  |
| 25      | CEPE SPERC 2.2a3.v1    | CEPE SPERC 2.2a3.v1 - CEPE 10 - Formulation of Liquid Coatings and Inks (where specific use not known) - Solids                                                                                                                     | 9.7E-05                 | 5.0E-03                         | 0.0E+00                  |
| 26      | CEPE SPERC 8c.2.v1     | CEPE SPERC 8c.2.v1 - CEPE 11 - Wide Dispersive Application of Decorative Coatings - Consumer and Professionals - indoor use - Solvents and volatiles                                                                                | 9.9E-01                 | 1.0E-02                         | 0.0E+00                  |
| 27      | CEPE SPERC 8c.1.v1     | CEPE SPERC 8c.1.v1 - CEPE 12 - Wide Dispersive Application of Decorative Coatings - Consumer and Professionals - indoor use - Solids                                                                                                | 0.0E+00                 | 1.0E-02                         | 0.0E+00                  |
| 28      | CEPE SPERC 8f.2.v1     | CEPE SPERC 8f.2.v1 - CEPE 13 - Wide Dispersive Application of Decorative Coatings - Consumer and Professionals - outdoor use - Solvents and Volatiles                                                                               | 9.9E-01                 | 1.0E-02                         | 5.0E-03                  |
| 29      | CEPE SPERC 8f.1.v1     | CEPE SPERC 8f.1.v1 - CEPE 14 - Wide Dispersive Application of Decorative Coatings - Consumer and Professionals - outdoor use - Solids                                                                                               | 0.0E+00                 | 1.0E-02                         | 5.0E-03                  |
| 30      | CEPE SPERC 4.na.v1     | CEPE SPERC 4.na.v1 - CEPE 15 - Other spray coating - Volatiles / Abatement                                                                                                                                                          | 8.0E-01                 | 2.0E-02                         | 0.0E+00                  |
| 31      | CEPE SPERC 4.nb.v1     | CEPE SPERC 4.nb.v1 - CEPE 16a - Other spray coating, indoor use - point sources - Volatiles                                                                                                                                         | 9.8E-01                 | 2.0E-02                         | 0.0E+00                  |
| 32      | CEPE SPERC 8a.n.v1     | CEPE SPERC 8a.n.v1 - CEPE 16b - Other spray coating, indoor use - wide dispersive - Volatiles                                                                                                                                       | 9.8E-01                 | 2.0E-02                         | 0.0E+00                  |
| 33      | CEPE SPERC 5.na.v1     | CEPE SPERC 5.na.v1 - CEPE 17a - Other spray coating, indoor use - point sources - Solids                                                                                                                                            | 2.2E-02                 | 0.0E+00                         | 0.0E+00                  |
| 34      | CEPE SPERC 8c.nb.v1    | CEPE SPERC 8c.nb.v1 - CEPE 17b - Other spray coating, indoor use - wide dispersive - Solids                                                                                                                                         | 2.2E-02                 | 0.0E+00                         | 0.0E+00                  |
| 35      | CEPE SPERC 5.na.v1     | CEPE SPERC 5.na.v1 - CEPE 18 - Powder spraying                                                                                                                                                                                      | 2.0E-02                 | 0.0E+00                         | 0.0E+00                  |
| 36      | CEPE SPERC 8a.1a.v1    | CEPE SPERC 8a.1a.v1 - CEPE 20 - application - consumer - bush/roller - indoor use - volatiles                                                                                                                                       | 9.9E-01                 | 1.0E-02                         | 0.0E+00                  |
| 37      | CEPE SPERC 8c.1a.v1    | CEPE SPERC 8c.1a.v1 - CEPE 21 - application - consumer - bush/roller - indoor use - solids                                                                                                                                          | 0.0E+00                 | 1.0E-02                         | 0.0E+00                  |
| 38      | CEPE SPERC 8d.1a.v1    | CEPE SPERC 8d.1a.v1 - CEPE 22 - application - consumer - bush/roller - outdoor use - volatiles                                                                                                                                      | 9.9E-01                 | 1.0E-02                         | 5.0E-03                  |
| 39      | CEPE SPERC 8f.1a.v1    | CEPE SPERC 8f.1a.v1 - CEPE 23 - application - consumer - bush/roller - outdoor use - solids                                                                                                                                         | 0.0E+00                 | 1.0E-02                         | 5.0E-03                  |
| 40      | CEPE SPERC 8a.2a.v1    | CEPE SPERC 8a.2a.v1 - CEPE 30 - application - professional - bush/roller - indoor use - volatiles                                                                                                                                   | 9.9E-01                 | 1.0E-02                         | 0.0E+00                  |
| 41      | CEPE SPERC 8c.2a.v1    | CEPE SPERC 8c.2a.v1 - CEPE 31 - application - professional - bush/roller - indoor use - solids                                                                                                                                      | 0.0E+00                 | 1.0E-02                         | 0.0E+00                  |
| 42      | CEPE SPERC 8d.2a.v1    | CEPE SPERC 8d.2a.v1 - CEPE 32 - application - professional - bush/roller - outdoor use - volatiles                                                                                                                                  | 9.9E-01                 | 1.0E-02                         | 5.0E-03                  |
| 43      | CEPE SPERC 8f.2a.v1    | CEPE SPERC 8f.2a.v1 - CEPE 33 - application - professional - bush/roller - outdoor use - solids                                                                                                                                     | 0.0E+00                 | 1.0E-02                         | 5.0E-03                  |
| 44      | CEPE SPERC 8a.3a.v1    | CEPE SPERC 8a.3a.v1 - CEPE 34 - application - professional - spraying - indoor use - volatiles                                                                                                                                      | 9.8E-01                 | 2.0E-02                         | 0.0E+00                  |
| 45      | CEPE SPERC 8c.3a.v1    | CEPE SPERC 8c.3a.v1 - CEPE 35 - application - professional - spraying - indoor use - solids                                                                                                                                         | 2.2E-02                 | 0.0E+00                         | 0.0E+00                  |
| 46      | CEPE SPERC 8d.3a.v1    | CEPE SPERC 8d.3a.v1 - CEPE 36 - application - professional - spraying - outdoor use - volatiles                                                                                                                                     | 9.8E-01                 | 2.0E-02                         | 0.0E+00                  |
| 47      | CEPE SPERC 8f.3a.v1    | CEPE SPERC 8f.3a.v1 - CEPE 37 - application - professional - spraying - outdoor use - solids                                                                                                                                        | 2.2E-02                 | 0.0E+00                         |                          |
| 48      | CEPE SPERC 4.1a.v1     | CEPE SPERC 4.1a.v1 - CEPE 50 - application - industrial - spraying - indoor use - incineration - volatiles                                                                                                                          | 8.0E-03                 | 2.0E-02                         | 0.0E+00                  |
| 49      | CEPE SPERC 4.1b.v1     | CEPE SPERC 4.1b.v1 - CEPE 51 - application - industrial - spraying - indoor use - volatiles                                                                                                                                         | 9.8E-01                 | 2.0E-02                         | 0.0E+00                  |
| 50      | CEPE SPERC 5.1a.v1     | CEPE SPERC 5.1a.v1 - CEPE 52 - application - industrial - spraying - indoor use - solids                                                                                                                                            | 2.0E-02                 | 0.0E+00                         | 0.0E+00                  |
| 51      | CEPE SPERC 5.2a.v1     | CEPE SPERC 5.2a.v1 - CEPE 53 - application - industrial - spraying - indoor use - powder                                                                                                                                            | 2.0E-02                 | 0.0E+00                         | 0.0E+00                  |
| 52      | ECCA SPERC 5.1a.v1     | ECCA SPERC 5.1a.v1 - ECCA 1 - Industrial Coil Coating - Solids                                                                                                                                                                      | 0.0E+00                 | 2.0E-03                         | 0.0E+00                  |
| 53      | ECCA SPERC 5.1b.v1     | ECCA SPERC 5.1b.v1 - ECCA 2 - Industrial Coil Coating - Volatiles                                                                                                                                                                   | 1.2E-01                 | 0.0E+00                         | 0.0E+00                  |
| 54      | EMPAC SPERC 5.1.v1     | EMPAC SPERC 5.1.v1 - EMPAC 1 - Industrial Use of Paint, Coatings in metal packaging - Non-Solvents                                                                                                                                  | 1.7E-02                 | 0.0E+00                         | 0.0E+00                  |
| 55      | EMPAC SPERC 5.2.v1     | EMPAC SPERC 5.2.v1 - EMPAC 2 - Industrial Use of Paint, Coatings in metal packaging - Solvents                                                                                                                                      | 1.0E+00                 | 0.0E+00                         | 0.0E+00                  |
| 56      | ACEA SPERC 5.1.v1      | ACEA SPERC 5.1.v1 - ACEA 1 - Automotive vehicles - Solids                                                                                                                                                                           | 1.7E-02                 | 0.0E+00                         | 3.3E-01                  |
| 57      | ACEA SPERC 4.1.v1      | ACEA SPERC 4.1.v1 - ACEA 2 - Automotive vehicles - Volatiles/Solvents                                                                                                                                                               | 7.5E-01                 | 1.0E-02                         | 0.0E+00                  |
| 58      | AIRC SPERC 8c.1.v1     | AIRC SPERC 8c.1.v1 - BFL_ZKF 1 - Vehicle Refinishing - Solids                                                                                                                                                                       | 2.5E-02                 | 0.0E+00                         | 4.8E-01                  |
| 59      | AIRC SPERC 8a.1.v1     | AIRC SPERC 8a.1.v1 - BFL_ZKF 2 - Vehicle Refinishing - Volatiles/Solvents                                                                                                                                                           | 9.7E-01                 | 3.0E-02                         | 0.0E+00                  |
| 60      | COLIPA SPERC 2.1.a.v1  | COLIPA SPERC 2.1.a.v1 - COLIPA 1 - Formulation of low viscosity liquids (Shampoo, hair conditioner, shower gel, foam bath) (large scale)                                                                                            | 0.0E+00                 | 1.0E-03                         | 0.0E+00                  |
| 61      | COLIPA SPERC 2.1.b.v1  | COLIPA SPERC 2.1.b.v1 - COLIPA 2 - Formulation of low viscosity liquids (Shampoo, hair conditioner, shower gel, foam bath) (medium scale)                                                                                           | 0.0E+00                 | 2.0E-03                         | 0.0E+00                  |
| 62      | COLIPA SPERC 2.1.c.v1  | COLIPA SPERC 2.1.c.v1 - COLIPA 3 - Formulation of low viscosity liquids (Shampoo, hair conditioner, shower gel, foam bath) (Small Scale)                                                                                            | 0.0E+00                 | 4.0E-03                         | 0.0E+00                  |
| 63      | COLIPA SPERC 2.1.d.v1  | COLIPA SPERC 2.1.d.v1 - COLIPA 4 - Formulation of Fine Fragrances - Cleaning with Water (medium scale)                                                                                                                              | 0.0E+00                 | 1.5E-02                         | 0.0E+00                  |
| 64      | COLIPA SPERC 2.1.e.v1  | COLIPA SPERC 2.1.e.v1 - COLIPA 5 - Formulation of Fine Fragrances - Cleaning with Water (small scale)                                                                                                                               | 0.0E+00                 | 3.0E-02                         | 0.0E+00                  |
| 65      | COLIPA SPERC 2.1.f.v1  | COLIPA SPERC 2.1.f.v1 - COLIPA 6 - Formulation of Medium Viscosity Body Care Products (medium scale)                                                                                                                                | 0.0E+00                 | 1.0E-02                         | 0.0E+00                  |
| 66      | COLIPA SPERC 2.1.g.v1  | COLIPA SPERC 2.1.g.v1 - COLIPA 7 - Formulation of Medium Viscosity Body Care Products (Small scale)                                                                                                                                 | 0.0E+00                 | 2.0E-02                         | 0.0E+00                  |
| 67      | COLIPA SPERC 2.1.h.v1  | COLIPA SPERC 2.1.h.v1 - COLIPA 8 - Formulation of Non-liquid Creams (skin care, body care, Mascara, Solar oil, Maku-up Foundation) (large scale)                                                                                    | 0.0E+00                 | 1.0E-02                         | 0.0E+00                  |
| 68      | COLIPA SPERC 2.1.i.v1  | COLIPA SPERC 2.1.i.v1 - COLIPA 9 - Formulation of Non-liquid Creams (skin care, body care, Mascara, Solar oil, Maku-up Foundation) (medium scale)                                                                                   | 0.0E+00                 | 2.0E-02                         | 0.0E+00                  |
| 69      | COLIPA SPERC 2.1.j.v1  | COLIPA SPERC 2.1.j.v1 - COLIPA 10 - Formulation of Non-liquid Creams (skin care, body care, Mascara, Solar oil, Maku-up Foundation) (small scale)                                                                                   | 0.0E+00                 | 4.0E-02                         | 0.0E+00                  |
| 70      | COLIPA SPERC 2.2.a.v1  | COLIPA SPERC 2.2.a.v1 - COLIPA 11 - Formulation of cosmetic products involving cleaning with Organic Solvents (Varnish / Removers, Decorative Cosmetics, Spray, Lacquer, Fine Fragrance, Solar oil, solid products - (large scale)  | 0.0E+00                 | 0.0E+00                         | 0.0E+00                  |
| 71      | COLIPA SPERC 2.2.b.v1  | COLIPA SPERC 2.2.b.v1 - COLIPA 12 - Formulation of cosmetic products involving cleaning with Organic Solvents (Varnish / Removers, Decorative Cosmetics, Spray, Lacquer, Fine Fragrance, Solar oil, solid products - (medium scale) | 0.0E+00                 | 0.0E+00                         | 0.0E+00                  |
| 72      | COLIPA SPERC 2.2.c.v1  | COLIPA SPERC 2.2.c.v1 - COLIPA 13 - Formulation of cosmetic products involving cleaning with Organic Solvents (Varnish / Removers, Decorative Cosmetics, Spray, Lacquer, Fine Fragrance, Solar oil, solid products - (small scale)  | 0.0E+00                 | 0.0E+00                         | 0.0E+00                  |
| 73      | COLIPA SPERC 2.3.a.v1  | COLIPA SPERC 2.3.a.v1 - COLIPA 14 - Formulation of body care soap (large scale)                                                                                                                                                     | 0.0E+00                 | 5.0E-04                         | 0.0E+00                  |
| 74      | COLIPA SPERC 2.3.b.v1  | COLIPA SPERC 2.3.b.v1 - COLIPA 15 - Formulation of body care soap (medium scale)                                                                                                                                                    | 0.0E+00                 | 1.0E-03                         | 0.0E+00                  |
| 75      | COLIPA SPERC 2.3.c.v1  | COLIPA SPERC 2.3.c.v1 - COLIPA 16 - Formulation of body care soap (small scale)                                                                                                                                                     | 0.0E+00                 | 2.0E-03                         | 0.0E+00                  |
| 76      | COLIPA SPERC 8a.1.a.v1 | COLIPA SPERC 8a.1.a.v1 - COLIPA 17 - Wide Dispersive Use in 'Down the Drain' products - hair and skin care products (Consumers and Professionals)                                                                                   | 0.0E+00                 | 1.0E+00                         | 0.0E+00                  |
| 77      | COLIPA SPERC 8a.1.b.v1 | COLIPA SPERC 8a.1.b.v1 - COLIPA 18 - Wide Dispersive Use of Aerosol products for hair and skin care (Propellants)                                                                                                                   | 1.0E+00                 | 0.0E+00                         | 0.0E+00                  |
| 78      | COLIPA SPERC 8a.1.c.v1 | COLIPA SPERC 8a.1.c.v1 - COLIPA 19 - Wide Dispersive Use of Aerosol products for hair and skin care (Non-Propellants)                                                                                                               | 0.0E+00                 | 1.0E+00                         | 0.0E+00                  |

|     |                      |                                                                                                                                                                                                                                                                                                                 |         |         |         |
|-----|----------------------|-----------------------------------------------------------------------------------------------------------------------------------------------------------------------------------------------------------------------------------------------------------------------------------------------------------------|---------|---------|---------|
| 79  | EFCC SPERC 2.1a.v1   | EFCC SPERC 2.1a.v1 - EFCC 1 - Volatile substances (main component) for the Formulation of Construction Chemicals. Only applicable for volatile substances. Main component as e.g. solvents usually been used in concentrations above 5%.                                                                        | 1.0E-02 | 5.0E-03 | 0.0E+00 |
| 80  | EFCC SPERC 2.1b.v1   | EFCC SPERC 2.1b.v1 - EFCC 2 - Volatile substances (additives) for the Formulation of Construction Chemicals. Only applicable for volatile substances. Additives usually been used in concentrations below 5%.                                                                                                   | 1.0E-02 | 5.0E-03 | 0.0E+00 |
| 81  | EFCC SPERC 2.1c.v1   | EFCC SPERC 2.1c.v1 - EFCC 3 - Non-Volatile substances for the Formulation of Construction Chemicals. Only applicable for non-volatile substances.                                                                                                                                                               | 0.0E+00 | 5.0E-03 | 0.0E+00 |
| 82  | EFCC SPERC 4.1a.v1   | EFCC SPERC 4.1a.v1 - EFCC 4 - Industrial use of volatile substances (main components) in Construction Chemicals. Only applicable for volatile substances. Main component as e.g. solvents usually been used in concentrations above 5%.                                                                         | 9.9E-01 | 0.0E+00 | 0.0E+00 |
| 83  | EFCC SPERC 4.1b.v1   | EFCC SPERC 4.1b.v1 - EFCC 5 - Industrial use of volatile substances (additives) in Construction Chemicals. Only applicable for volatile substances. Additives usually been used in concentrations below 5%.                                                                                                     | 9.9E-01 | 0.0E+00 | 0.0E+00 |
| 84  | EFCC SPERC 5.1a.v1   | EFCC SPERC 5.1a.v1 - EFCC 6 - Industrial use of non-volatile substances in Construction Chemicals. Only applicable for non-volatile substances.                                                                                                                                                                 | 1.7E-02 | 0.0E+00 | 0.0E+00 |
| 85  | EFCC SPERC 8A.1a.v1  | EFCC SPERC 8A.1a.v1 - EFCC 7 - Wide dispersive use of volatile substances in Construction Chemicals, indoor. Only applicable for volatile substances.                                                                                                                                                           | 9.8E-01 | 1.0E-02 | 0.0E+00 |
| 86  | EFCC SPERC 8C.1a.v1  | EFCC SPERC 8C.1a.v1 - EFCC 8 - Wide dispersive use of non-volatile substances in Construction Chemicals, indoor. Only applicable for non-volatile substances.                                                                                                                                                   | 0.0E+00 | 1.0E-02 | 0.0E+00 |
| 87  | EFCC SPERC 8D.1a.v1  | EFCC SPERC 8D.1a.v1 - EFCC 9 - Wide dispersive use of volatile substances in Construction Chemicals, outdoor. Only applicable for volatile substances.                                                                                                                                                          | 9.8E-01 | 1.0E-02 | 0.0E+00 |
| 88  | EFCC SPERC 8F.1a.v1  | EFCC SPERC 8F.1a.v1 - EFCC 10 - Wide dispersive use of non-volatile substances in Construction Chemicals, outdoor. Only applicable for non-volatile substances.                                                                                                                                                 | 0.0E+00 | 1.0E-02 | 3.7E-02 |
| 89  | ESVOC SpERC 1.1.v1   | ESVOC SpERC 1.1.v1 - ESVO 1 - Manufacture of the substance and subsequent recycling/ recovery, including material transfers, storage, and maintenance                                                                                                                                                           | 1.0E-06 | 3.0E-03 | 1.0E-04 |
| 90  | ESVOC SpERC 6.1a.v1  | ESVOC SpERC 6.1a.v1 - ESVO 2 - Use as a isolated intermediate not under strictly controlled conditions                                                                                                                                                                                                          | 0.0E+00 | 3.0E-03 | 1.0E-03 |
| 91  | ESVOC SpERC 1.1b.v1  | ESVOC SpERC 1.1b.v1 - ESVO 3 - Loading (including marine vessel/barge, rail car and IBC loading) and repacking (including drums and small packs), including losses during off-site storage (e.g. terminals)                                                                                                     | 1.0E-04 | 1.0E-05 | 1.0E-05 |
| 92  | ESVOC SpERC 2.2.v1   | ESVOC SpERC 2.2.v1 - ESVO 4 - Formulation & packing of mixtures in batch or continuous operations, including storage, materials transfers, large and small scale                                                                                                                                                | 2.5E-03 | 2.0E-03 | 1.0E-04 |
| 93  | ESVOC SpERC 4.3a.v1  | ESVOC SpERC 4.3a.v1 - ESVO 5 - Covers the use in coatings (paints, inks, adhesives, etc) including exposures during use (including materials transfer from bulk and semi-bulk and spraying, brushing and other manual application tasks); and equipment cleaning                                                | 9.8E-01 | 7.0E-03 | 0.0E+00 |
| 94  | ESVOC SpERC 8.3b.v1  | ESVOC SpERC 8.3b.v1 - ESVO 6 - Covers the use in coatings (paints, inks, adhesives, etc) including exposures during use (including materials transfer and spraying, brushing and other manual application tasks); and equipment cleaning                                                                        | 9.8E-01 | 1.0E-02 | 1.0E-02 |
| 95  | ESVOC SpERC 8.3c.v1  | ESVOC SpERC 8.3c.v1 - ESVO 7 - Covers the use in coatings (paints, inks, adhesives, etc) including exposures during use (including product transfer and spraying, brushing, aerosol and other manual application tasks); and equipment cleaning                                                                 | 9.9E-01 | 1.0E-02 | 5.0E-03 |
| 96  | ESVOC SpERC 4.4a.v1  | ESVOC SpERC 4.4a.v1 - ESVO 8 - Covers the use as a component of cleaning products for industrial use including transfer from storage; pouring/unloading from drums or containers; exposures during cleaning activities (automated and by hand); and related maintenance                                         | 3.0E-01 | 3.0E-05 | 0.0E+00 |
| 97  | ESVOC SpERC 8.4b.v1  | ESVOC SpERC 8.4b.v1 - ESVO 9 - Covers the use as a component of cleaning products for professional use including pouring/unloading from drums or containers; and exposures during cleaning activities (automated and by hand)                                                                                   | 2.0E-02 | 1.0E-06 | 0.0E+00 |
| 98  | ESVOC SpERC 8.4c.v1  | ESVOC SpERC 8.4c.v1 - ESVO 10 - Covers general exposures to consumers arising from the use household products sold as washing and cleaning products, aerosols, coatings, de-icers, lubricants and air care products                                                                                             | 9.5E-01 | 2.5E-02 | 2.5E-02 |
| 99  | ESVOC SpERC 4.6a.v1  | ESVOC SpERC 4.6a.v1 - ESVO 13 - Covers the industrial use of formulated lubricants in closed and open systems including transfer operations, operation of engines and similar articles, maintenance and disposal of waste oil                                                                                   | 3.0E-05 | 3.0E-04 | 1.0E-03 |
| 100 | ESVOC SpERC 9.6b.v1  | ESVOC SpERC 9.6b.v1 - ESVO 14 - Covers the professional use of formulated lubricants in closed systems including transfer operations, operation of engines and similar articles, recycling and disposal of waste oil                                                                                            | 1.0E-02 | 1.0E-02 | 1.0E-02 |
| 101 | ESVOC SpERC 8.6c.v1  | ESVOC SpERC 8.6c.v1 - ESVO 15 - Covers the professional use of formulated lubricants in open systems including transfer operations, operation of engines and similar articles, recycling and disposal of waste oil                                                                                              | 5.0E-03 | 5.0E-02 | 5.0E-02 |
| 102 | ESVOC SpERC 9.6d.v1  | ESVOC SpERC 9.6d.v1 - ESVO 16 - Covers the consumer use of formulated lubricants in closed systems including transfer operations, application, operation of engines and similar articles, recycling and disposal of waste oil.                                                                                  | 1.0E-02 | 1.0E-02 | 1.0E-02 |
| 103 | ESVOC SpERC 8.6e.v1  | ESVOC SpERC 8.6e.v1 - ESVO 17 - Covers the consumer use of formulated lubricants in open systems including transfer operations, application, operation of engines and similar articles, recycling and disposal of waste oil.                                                                                    | 5.0E-03 | 5.0E-02 | 5.0E-02 |
| 104 | ESVOC SpERC 4.7a.v1  | ESVOC SpERC 4.7a.v1 - ESVO 18 - Covers the industrial use in formulated MWFs/rolling oils including transfer operations, open rolling and annealing activities, open and contained cutting/machining activities, draining and working on contaminated/ reject articles, recycling and disposal of waste oils.   | 6.0E-03 | 3.0E-04 | 0.0E+00 |
| 105 | ESVOC SpERC 8.7c.v1  | ESVOC SpERC 8.7c.v1 - ESVO 20 - Covers the professional use in formulated MWFs/rolling oils including transfer operations, open rolling and annealing activities, open and contained cutting/machining activities, draining and working on contaminated/ reject articles, recycling and disposal of waste oils. | 5.0E-03 | 5.0E-02 | 5.0E-02 |
| 106 | ESVOC SpERC 4.9.v1   | ESVOC SpERC 4.9.v1 - ESVO 23 - Use as a blowing agent, including material transfers, curing, storage and maintenance                                                                                                                                                                                            | 1.0E+00 | 3.0E-04 | 0.0E+00 |
| 107 | ESVOC SpERC 4.10a.v1 | ESVOC SpERC 4.10a.v1 - ESVO 24 - Use as binders and release agents in industrial settings, including material transfers, mixing, application and disposal                                                                                                                                                       | 2.0E-01 | 3.0E-05 | 0.0E+00 |
| 108 | ESVOC SpERC 8.10b.v1 | ESVOC SpERC 8.10b.v1 - ESVO 25 - Use as binders and release agents in professional settings, including material transfers, mixing, application and disposal                                                                                                                                                     | 9.5E-01 | 2.5E-02 | 2.5E-02 |
| 109 | ESVOC SpERC 8.11a.v1 | ESVOC SpERC 8.11a.v1 - ESVO 26 - Use as an agrochemical excipient for application by manual or machine spraying, smokes and fogging.                                                                                                                                                                            | 9.0E-01 | 1.0E-02 | 9.0E-02 |
| 110 | ESVOC SpERC 8.11b.v1 | ESVOC SpERC 8.11b.v1 - ESVO 27 - Use as an agrochemical excipient for application by manual spraying and aerosols                                                                                                                                                                                               | 9.0E-01 | 1.0E-02 | 9.0E-02 |
| 111 | ESVOC SpERC 7.12a.v1 | ESVOC SpERC 7.12a.v1 - ESVO 28 - Use as a fuel including incineration of wastes and use as a solvent in fuel additives, covers refueling and evaporative losses                                                                                                                                                 | 2.5E-04 | 1.0E-05 | 0.0E+00 |
| 112 | ESVOC SpERC 9.12b.v1 | ESVOC SpERC 9.12b.v1 - ESVO 29 - Use as a fuel including use as a solvent in fuel additives; covers refueling and evaporative losses                                                                                                                                                                            | 1.0E-04 | 1.0E-05 | 1.0E-05 |
| 113 | ESVOC SpERC 9.12c.v1 | ESVOC SpERC 9.12c.v1 - ESVO 30 - Use as a fuel including use as a solvent in fuel additives, covers refueling and evaporative losses                                                                                                                                                                            | 1.0E-04 | 1.0E-05 | 1.0E-05 |
| 114 | ESVOC SpERC 7.13a.v1 | ESVOC SpERC 7.13a.v1 - ESVO 31 - Use as functional fluids e.g. cable oils, transfer oils, insulators, hydraulic fluids in industrial equipment including maintenance                                                                                                                                            | 1.0E-04 | 3.0E-04 | 1.0E-03 |
| 115 | ESVOC SpERC 9.13b.v1 | ESVOC SpERC 9.13b.v1 - ESVO 32 - Use as functional fluids e.g. cable oils, transfer oils, insulators, hydraulic fluids in professional equipment including                                                                                                                                                      | 5.0E-02 | 2.5E-02 | 2.5E-02 |
| 116 | ESVOC SpERC 9.13c.v1 | ESVOC SpERC 9.13c.v1 - ESVO 33 - Use of sealed items containing functional fluids e.g. transfer oils, hydraulic fluids                                                                                                                                                                                          | 5.0E-02 | 2.5E-02 | 2.5E-02 |
| 117 | ESVOC SpERC 8.14a.v1 | ESVOC SpERC 8.14a.v1 - ESVO 34 - De-icing of vehicles, aircraft and other equipment by spraying                                                                                                                                                                                                                 | 9.5E-01 | 1.0E-02 | 4.0E-02 |
| 118 | ESVOC SpERC 8.14b.v1 | ESVOC SpERC 8.14b.v1 - ESVO 35 - De-icing of vehicles and similar equipment by spraying                                                                                                                                                                                                                         | 9.0E-01 | 5.0E-02 | 5.0E-02 |
| 119 | ESVOC SpERC 8.15.v1  | ESVOC SpERC 8.15.v1 - ESVO 36 - Application of surface coatings and binders in road and construction activities, including material transfers and product disposal                                                                                                                                              | 9.5E-01 | 1.0E-02 | 4.0E-02 |
| 120 | ESVOC SpERC 8.16.v1  | ESVOC SpERC 8.16.v1 - ESVO 37 - Other Consumer Uses: Consumer                                                                                                                                                                                                                                                   | 9.5E-01 | 2.5E-02 | 2.5E-02 |
| 121 | ESVOC SpERC 4.24.v1  | ESVOC SpERC 4.24.v1 - ESVO 38 - Use of the substance within laboratory setting, including pilot plants                                                                                                                                                                                                          | 2.5E-02 | 2.0E-02 | 1.0E-04 |
| 122 | ESVOC SpERC 8.17.v1  | ESVOC SpERC 8.17.v1 - ESVO 39 - Use of small quantities within laboratory settings                                                                                                                                                                                                                              | 5.0E-01 | 5.0E-01 | 0.0E+00 |
| 123 | ESVOC SpERC 2.18.v1  | ESVOC SpERC 2.18.v1 - ESVO 40 - Covers exposures arising from the manufacture of slurry explosives (including materials transfer, mixing and charging) and                                                                                                                                                      | 1.0E-04 | 3.0E-04 | 1.0E-04 |
| 124 | ESVOC SpERC 8.24.v1  | ESVOC SpERC 8.24.v1 - ESVO 41 - Explosives manufacturer: Professional                                                                                                                                                                                                                                           | 1.0E-03 | 2.0E-02 | 1.0E-02 |
| 125 | ESVOC SpERC 4.19.v1  | ESVOC SpERC 4.19.v1 - ESVO 42 - Manufacture of rubber articles, including processing of raw rubber, handling and mixing of rubber additives, vulcanising,                                                                                                                                                       | 1.0E-02 | 3.0E-03 | 1.0E-04 |
| 126 | ESVOC SpERC 4.20.v1  | ESVOC SpERC 4.20.v1 - ESVO 43 - Manufacture of polymers from monomers in continuous and batch processes, include sparging, discharging, and reactor maintenance and immediate polymer product formation (i.e. compounding, pelletisation, product off-gassing).                                                 | 2.0E-03 | 3.0E-03 | 1.0E-04 |
| 127 | ESVOC SpERC 4.21a.v1 | ESVOC SpERC 4.21a.v1 - ESVO 44 - Processing of formulated polymers including material transfers, additives handling, moulding, curing and forming activities, material re-works and associated maintenance.                                                                                                     | 2.0E-02 | 0.0E+00 | 1.0E-05 |
| 128 | ESVOC SpERC 8.21b.v1 | ESVOC SpERC 8.21b.v1 - ESVO 45 - Processing of formulated polymers including material transfers, moulding and forming activities, material re-works and                                                                                                                                                         | 9.8E-01 | 1.0E-02 | 1.0E-02 |
| 129 | ESVOC SpERC 3.22a.v1 | ESVOC SpERC 3.22a.v1 - ESVO 46 - Covers the use of the substance for the treatment of water at industrial facilities in open and closed systems                                                                                                                                                                 | 5.0E-02 | 9.5E-01 | 0.0E+00 |
| 130 | ESVOC SpERC 8.22b.v1 | ESVOC SpERC 8.22b.v1 - ESVO 47 - Covers the use of the substance for the treatment of water in open and closed systems                                                                                                                                                                                          | 1.0E-02 | 9.9E-01 | 0.0E+00 |
| 131 | ESVOC SpERC 8.22c.v1 | ESVOC SpERC 8.22c.v1 - ESVO 48 - Covers the use of the substance for the treatment of water in open and closed systems                                                                                                                                                                                          | 1.0E-02 | 9.9E-01 | 0.0E+00 |
| 132 | ESVOC SpERC 4.23.v1  | ESVOC SpERC 4.23.v1 - ESVO 49 - Covers the use of the substance in extraction processes at mining operations, including material transfers, winning and separation activities, and substance recovery and disposal.                                                                                             | 5.0E-02 | 5.0E-01 | 5.0E-02 |
| 133 | ESVOC SpERC 9.24a.v1 | ESVOC SpERC 9.24a.v1 - ESVO 50 - Release of unburned residual fuel in exhaust from combustion of fuel in stationary engines, e.g. industrial fuel combustion                                                                                                                                                    | 1.0E-03 | 0.0E+00 | 0.0E+00 |
| 134 | ESVOC SpERC 9.24b.v1 | ESVOC SpERC 9.24b.v1 - ESVO 51 - Release of unburned residual fuel in exhaust from combustion of fuel in stationary engines, e.g. heating oil                                                                                                                                                                   | 5.0E-03 | 0.0E+00 | 0.0E+00 |
| 135 | ESVOC SpERC 9.24c.v1 | ESVOC SpERC 9.24c.v1 - ESVO 52 - Release of unburned residual fuel in exhaust from combustion of fuel in stationary engines, e.g. heating oil                                                                                                                                                                   | 5.0E-03 | 0.0E+00 | 0.0E+00 |
| 136 | FEICA SPERC 2.1a.v1  | FEICA SPERC 2.1a.v1 - FEICA 1 - Formulation of Solventless/ Solvent Borne Adhesives - Solids                                                                                                                                                                                                                    | 1.0E-02 | 5.0E-05 | 0.0E+00 |
| 137 | FEICA SPERC 2.1b.v1  | FEICA SPERC 2.1b.v1 - FEICA 2 - Formulation of Solvent Borne adhesives - Volatiles (Large Scale)                                                                                                                                                                                                                | 1.2E-03 | 0.0E+00 | 0.0E+00 |
| 138 | FEICA SPERC 2.1c.v1  | FEICA SPERC 2.1c.v1 - FEICA 3 - Formulation of Solvent Borne adhesives - Volatiles (Small Scale)                                                                                                                                                                                                                | 6.0E-03 | 0.0E+00 | 0.0E+00 |
| 139 | FEICA SPERC 2.2a.v1  | FEICA SPERC 2.2a.v1 - FEICA 4 - Formulation of Water Borne adhesives - Volatiles                                                                                                                                                                                                                                | 4.0E-03 | 5.0E-02 | 0.0E+00 |
| 140 | FEICA SPERC 2.2b.v1  | FEICA SPERC 2.2b.v1 - FEICA 5 - Formulation of Water Borne adhesives - Solids                                                                                                                                                                                                                                   | 9.7E-05 | 5.0E-02 | 0.0E+00 |
| 141 | FEICA SPERC 5.1a.v1  | FEICA SPERC 5.1a.v1 - FEICA 6 - Industrial Use of Substances other than Solvents in Paper, Board and related Products / Woodworking and joinery / Footwear and                                                                                                                                                  | 9.0E-03 | 0.0E+00 | 0.0E+00 |
| 142 | FEICA SPERC 5.1b.v1  | FEICA SPERC 5.1b.v1 - FEICA 7 - Industrial Use of Substances other than Solvents in Transportation (Automotive/aircraft/rail vehicles) / Industrial Building                                                                                                                                                    | 1.7E-02 | 0.0E+00 | 0.0E+00 |
| 143 | FEICA SPERC 5.2a.v1  | FEICA SPERC 5.2a.v1 - FEICA 8 - Industrial Use of Solvents in Paper, Board and related Products / Woodworking and joinery / Footwear and Leather, Textile, Others                                                                                                                                               | 9.9E-01 | 0.0E+00 | 0.0E+00 |
| 144 | FEICA SPERC 5.2b.v1  | FEICA SPERC 5.2b.v1 - FEICA 9 - Industrial Use of Solvents in Transportation (Automotive/aircraft/rail vehicles) / Industrial Building Construction Adhesives                                                                                                                                                   | 9.9E-01 | 0.0E+00 | 0.0E+00 |
| 145 | FEICA SPERC 8c.1a.v1 | FEICA SPERC 8c.1a.v1 - FEICA 10 - Wide dispersive Use of Substances other than Solvents in Building Construction Adhesives for indoor application                                                                                                                                                               | 0.0E+00 | 1.0E-02 | 0.0E+00 |
| 146 | FEICA SPERC 8c.1b.v1 | FEICA SPERC 8c.1b.v1 - FEICA 11 - Wide dispersive Use of Substances other than Solvents in Professional and DIY Adhesives                                                                                                                                                                                       | 0.0E+00 | 9.0E-03 | 0.0E+00 |
| 147 | FEICA SPERC 8a.2a.v1 | FEICA SPERC 8a.2a.v1 - FEICA 12 - Wide dispersive Use of Solvents in Building Construction Adhesives for indoor application                                                                                                                                                                                     | 9.8E-01 | 1.0E-02 | 0.0E+00 |
| 148 | FEICA SPERC 8a.2b.v1 | FEICA SPERC 8a.2b.v1 - FEICA 13 - Wide dispersive Use of Solvents in Professional and DIY Adhesives                                                                                                                                                                                                             | 9.9E-01 | 0.0E+00 | 0.0E+00 |
| 149 | FEICA SPERC 8f.1.v1  | FEICA SPERC 8f.1.v1 - FEICA 14 - Wide dispersive Use of Substances other than Solvents in Building Construction Adhesives for outdoor application                                                                                                                                                               | 0.0E+00 | 1.0E-02 | 0.0E+00 |

|     |                         |                                                                                                                                                                                                                                                                                  |         |         |         |
|-----|-------------------------|----------------------------------------------------------------------------------------------------------------------------------------------------------------------------------------------------------------------------------------------------------------------------------|---------|---------|---------|
| 150 | FEICA SPERC 8d.2.v1     | FEICA SPERC 8d.2.v1 - FEICA 15 - Wide dispersive Use of Solvents in Building Construction Adhesives for outdoor application                                                                                                                                                      | 9.8E-01 | 1.0E-02 | 0.0E+00 |
| 151 | ECPA SPERC 8d.1.v1      | ECPA SPERC 8d.1.v1 - ECPA 1 - Direct application of granules or treated seeds to soil                                                                                                                                                                                            | 0.0E+00 | 0.0E+00 | 1.0E+00 |
| 152 | ECPA SPERC 8d.2.v2      | ECPA SPERC 8d.2.v2 - ECPA 2 - Spray application of plant protection products (releases dependent on co-formulant vapour pressure)                                                                                                                                                | 1.0E-02 | 0.0E+00 | 9.9E-01 |
| 153 | ETRMA SPERC 3/6d.1a v.2 | ETRMA SPERC 3/6d.1a v.2 - ETRMA 3/6d.1a - Process with efficient raw material use - GRG use of vulcanization agents, anti-ageing agents / antidegradants                                                                                                                         | 1.0E-03 | 2.0E-04 | 0.0E+00 |
| 154 | ETRMA SPERC 3/6d.1b v.2 | ETRMA SPERC 3/6d.1b v.2 - ETRMA 3/6d.1b - Process with efficient raw material use - GRG use of reinforcing agents, hardeners                                                                                                                                                     | 1.0E-03 | 2.0E-04 | 0.0E+00 |
| 155 | ETRMA SPERC 3/6d.1c v.2 | ETRMA SPERC 3/6d.1c v.2 - ETRMA 3/6d.1c - Process with efficient raw material use - GRG use of bonding agents                                                                                                                                                                    | 1.0E-03 | 2.0E-04 | 0.0E+00 |
| 156 | ETRMA SPERC 3/6d.1d v.2 | ETRMA SPERC 3/6d.1d v.2 - ETRMA 3/6d.1d - Process with efficient raw material use - GRG use of mastication agents/peptiser                                                                                                                                                       | 1.0E-03 | 2.0E-04 | 0.0E+00 |
| 157 | ETRMA SPERC 3/6d.2a v.2 | ETRMA SPERC 3/6d.2a v.2 - ETRMA 3/6d.2a - Process with efficient raw material use and mechanical pre-treatment - GRG use of vulcanization agents, anti-ageing                                                                                                                    | 1.0E-03 | 8.0E-05 | 0.0E+00 |
| 158 | ETRMA SPERC 3/6d.2b v.2 | ETRMA SPERC 3/6d.2b v.2 - ETRMA 3/6d.2b - Process with efficient raw material use and mechanical pre-treatment - GRG use of reinforcing agents, hardeners                                                                                                                        | 1.0E-03 | 8.0E-05 | 0.0E+00 |
| 159 | ETRMA SPERC 3/6d.2c v.2 | ETRMA SPERC 3/6d.2c v.2 - ETRMA 3/6d.2c - Process with efficient raw material use and mechanical pre-treatment - GRG use of bonding agents                                                                                                                                       | 1.0E-03 | 8.0E-05 | 0.0E+00 |
| 160 | ETRMA SPERC 3/6d.2d v.2 | ETRMA SPERC 3/6d.2d v.2 - ETRMA 3/6d.2d - Process with efficient raw material use and mechanical pre-treatment - GRG use of mastication agents/peptiser                                                                                                                          | 1.0E-03 | 8.0E-05 | 0.0E+00 |
| 161 | ETRMA SPERC 3/6d.3a v.1 | ETRMA SPERC 3/6d.3a v.1 - ETRMA 3/6d.3a - Process with optimization for efficient raw materials use - Tyre use of reinforcing agents, hardeners, mastication agents/peptiser, anti-ageing agents/antidegradants and GRG use of tackifiers, filler activators and bonding agents. | 1.0E-03 | 1.0E-05 | 0.0E+00 |
| 162 | ETRMA SPERC 3/6d.3b v.1 | ETRMA SPERC 3/6d.3b v.1 - ETRMA 3/6d.3b - Process with optimization for efficient raw materials use - Tyre use of vulcanization agents, lubricants, tackifiers, filler activators, bonding agents and GRG use of fillers and pigments.                                           | 1.0E-03 | 1.0E-05 | 0.0E+00 |
| 163 | ETRMA SPERC 3/6d.3c v.1 | ETRMA SPERC 3/6d.3c v.1 - ETRMA 3/6d.3c - Process with optimization for efficient raw materials use - Tyre use of fillers and pigments.                                                                                                                                          | 1.0E-03 | 1.0E-05 | 0.0E+00 |
| 164 | TEGEWA SPERC 5.1a.v1    | TEGEWA SPERC 5.1a.v1 - TEGEWA 1 - Dyeing of Textiles - High efficiency                                                                                                                                                                                                           | 0.0E+00 | 5.0E-02 | 0.0E+00 |
| 165 | TEGEWA SPERC 5.1b.v1    | TEGEWA SPERC 5.1b.v1 - TEGEWA 2 - Dyeing of Textiles - Normal efficiency                                                                                                                                                                                                         | 0.0E+00 | 3.0E-01 | 0.0E+00 |
| 166 | TEGEWA SPERC 5.1c.v1    | TEGEWA SPERC 5.1c.v1 - TEGEWA 3 - Textile Finishing and Coating - Residues not retained                                                                                                                                                                                          | 1.0E-03 | 2.0E-01 | 0.0E+00 |
| 167 | TEGEWA SPERC 5.1d.v1    | TEGEWA SPERC 5.1d.v1 - TEGEWA 4 - Textile Finishing and Coating - Residues retained                                                                                                                                                                                              | 0.0E+00 | 5.0E-02 | 0.0E+00 |
| 168 | TEGEWA SPERC 6b.1.v1    | TEGEWA SPERC 6b.1.v1 - TEGEWA 5 - Use of reactive processing aid in textile processing                                                                                                                                                                                           | 0.0E+00 | 2.0E-02 | 0.0E+00 |
| 169 | TEGEWA SPERC 4.1.v1     | TEGEWA SPERC 4.1.v1 - TEGEWA 6 - Industrial Use of Water Borne Processing Aids - no RMM                                                                                                                                                                                          | 0.0E+00 | 1.0E+00 | 0.0E+00 |
