# Supplementary material for: Screening‐Level Estimates of Environmental Release Rates, Predicted Exposures, and Toxic Pressures of Currently Used Chemicals
Source: PubMed Central journal article supplement — Environ Toxicol Chem. 2020 Jul 31;39(9):1839–51. doi: 10.1002/etc.4801 (PMC7496123; doi:10.1002/etc.4801), 2020-07-31
Supplement: ETC-39-1839-s002.pdf [file ETC-39-1839-s002.pdf]

Toxic pressures of currently used chemicals from screening-level estimates of environmental release rate

|                 |                                                                                                                                    |
|-----------------|------------------------------------------------------------------------------------------------------------------------------------|
| <b>Model</b>    | SimpleBoxTreat, vs 4Solutions                                                                                                      |
| <b>Scenario</b> | 4REACH settings                                                                                                                    |
| <b>Case</b>     | calculation of expected toxic pressures on aquatic ecosystems from estimated emissions of chemical substances currently used in EU |

|     |         |                                      |     |    |         |         |         |      |         |         |         |       |       |         |         |         |      |       |      |       |      |       |       |         |
|-----|---------|--------------------------------------|-----|----|---------|---------|---------|------|---------|---------|---------|-------|-------|---------|---------|---------|------|-------|------|-------|------|-------|-------|---------|
| 136 | 18-55-1 | 3,5,3'-trifluoridylodibenzil-2-olone | 136 | 17 | 3.3E+01 | 2.0E+03 | 4.2E+02 | 14.0 | 3.3E+00 | 2.1E+01 | 1.1E+00 | 0.011 | 0.011 | 6.1E+03 | 1.1E+02 | 4.1E+03 | 7.02 | 16.73 | 7.36 | 10.70 | 0.70 | 0.00% | 0.00% | 1.3E+23 |
|-----|---------|--------------------------------------|-----|----|---------|---------|---------|------|---------|---------|---------|-------|-------|---------|---------|---------|------|-------|------|-------|------|-------|-------|---------|



|     |            |                                                                                                      |     |      |         |         |         |      |         |         |         |      |      |         |         |         |       |       |        |       |      |      |         |         |
|-----|------------|------------------------------------------------------------------------------------------------------|-----|------|---------|---------|---------|------|---------|---------|---------|------|------|---------|---------|---------|-------|-------|--------|-------|------|------|---------|---------|
| 342 | 5435-64-3  | 3,5,5-trimethylhexanal                                                                               | 142 | -35  | 1.8E-02 | 7.3E-01 | 1.2E+03 | 1.40 | 3.5E-06 | 1.1E-06 | 1.1E-06 | conf | conf | 1.7E-01 | 2.4E-01 | 8.6E+02 | -9.06 | 8.77  | -10.76 | -1.61 | 0.34 | 0.0% | 0.0%    | 2.5E-39 |
| 343 | 611-70-1   | isobutyrophosphone                                                                                   | 143 | 7    | 1.5E-01 | 2.3E-01 | 1.1E+03 | 1.40 | 3.5E-06 | 1.1E-06 | 1.1E-06 | conf | conf | 2.2E-01 | 2.8E-01 | 1.0E+03 | -7.07 | 7.81  | -10.67 | -1.67 | 0.07 | 0.0% | 0.0%    | 3.2E-30 |
| 344 | 1562-00-1  | sodium 2-hydroxyethanesulphonate                                                                     | 148 | 87   | 9.9E-03 | 1.0E-03 | 3.0E+02 | 1.40 | 3.5E-06 | 1.1E-07 | 6.6E-09 | conf | conf | 1.6E-03 | 2.3E-01 | 8.1E-02 | -5.82 | 6.12  | -7.77  | -6.00 | 0.64 | 0.0% | 0.0%    | 1.1E-17 |
| 345 | 106-14-9   | 12-hydroxyoctanoic acid                                                                              | 380 | 153  | 4.5E-07 | 1.1E-07 | 3.0E+06 | 4.9  | 3.5E-06 | 1.1E-06 | 3.5E-07 | conf | conf | 1.9E-05 | 2.7E-01 | 9.9E-06 | -6.46 | -7.43 | -8.99  | -9.31 | 0.19 | 0.0% | 0.0%    | 1.8E-13 |
| 346 | 110485-0   | opavene                                                                                              | 346 | 7    | 1.0E-03 | 1.0E-03 | 1.1E+01 | 9.6  | 3.5E-06 | 1.1E-06 | 1.1E-06 | conf | conf | 1.5E-01 | 1.0E-01 | 1.0E+01 | -1.47 | 1.58  | -1.44  | -1.44 | 0.00 | 0.0% | 0.0%    | 2.5E-30 |
| 347 | 2402-79-1  | 2,3,5,6-tetrachloropyridine                                                                          | 217 | 55   | 8.1E-01 | 2.1E-01 | 2.4E+03 | 1.40 | 3.5E-06 | 3.5E-07 | 3.5E-08 | conf | conf | 1.3E-01 | 1.9E-01 | 6.6E+02 | -7.74 | -7.47 | -8.79  | -2.51 | 0.44 | 0.0% | 0.0%    | 1.3E-19 |
| 348 | 112-07-2   | 2-butoxyethyl acetate                                                                                | 140 | -15  | 7.2E-02 | 3.2E-03 | 3.7E+01 | 1.40 | 3.5E-06 | 1.1E-06 | 1.1E-06 | conf | conf | 2.0E-03 | 2.8E-01 | 1.0E+03 | -1.99 | -7.99 | -9.00  | -4.70 | 0.55 | 0.0% | 0.0%    | 1.7E-13 |
| 349 | 101-77-9   | 4,4-methylenedianiline                                                                               | 128 | 128  | 2.8E-04 | 4.8E-02 | 1.5E+02 | 9.3  | 3.5E-06 | 1.1E-07 | 1.5E-07 | conf | conf | 2.0E-01 | 2.8E-01 | 1.0E+03 | -7.07 | -7.09 | -8.39  | -1.18 | 0.21 | 0.0% | 0.0%    | 1.1E-21 |
| 350 | 615-16-7   | 2-bromovinylindazole                                                                                 | 134 | 96   | 4.9E-02 | 6.5E-02 | 1.6E+01 | 1.40 | 3.5E-06 | 3.5E-07 | 3.5E-07 | conf | conf | 1.8E-01 | 2.5E-01 | 9.3E+02 | -6.17 | -6.59 | -8.37  | -1.99 | 1.16 | 0.0% | 0.0%    | 3.7E-20 |
| 351 | 108-99-1   | N,N'-bis(isobutyl)ethylenediamine                                                                    | 108 | 16   | 1.0E-03 | 1.1E-03 | 1.0E+01 | 1.40 | 3.5E-06 | 1.1E-06 | 1.1E-06 | conf | conf | 1.8E-01 | 2.5E-01 | 9.3E+02 | -6.17 | -6.59 | -8.37  | -1.99 | 1.16 | 0.0% | 0.0%    | 3.7E-20 |
| 352 | 5994-61-6  | N-carboxymethyl-L-phenylalanine                                                                      | 227 | 304  | 2.6E-11 | 1.1E-01 | 1.3E+05 | 1.40 | 3.5E-06 | 3.5E-07 | 3.5E-07 | conf | conf | 1.8E-01 | 2.5E-01 | 9.3E+02 | -6.17 | -6.59 | -8.37  | -1.99 | 1.16 | 0.0% | 0.0%    | 9.8E-26 |
| 353 | 110-17-8   | fumaric acid                                                                                         | 116 | 84   | 1.3E-09 | 5.5E-04 | 1.1E+00 | 3.0  | 3.5E-06 | 4.7E-06 | 1.1E-06 | conf | conf | 2.1E-01 | 3.0E-01 | 1.1E+03 | -4.37 | -7.77 | -9.58  | -0.97 | 0.95 | 0.0% | 0.0%    | 4.2E-35 |
| 354 | 7609-86-1  | 2-ethylhexyl mercaptacetate                                                                          | 16  | 16   | 1.1E-03 | 6.1E-01 | 4.8E+03 | 1.40 | 3.5E-06 | 1.1E-06 | 1.1E-06 | conf | conf | 1.4E-01 | 2.1E-01 | 8.1E+02 | -7.73 | -7.71 | -9.23  | -4.69 | 0.36 | 0.0% | 0.0%    | 4.5E-11 |
| 355 | 57-11-4    | stearic acid                                                                                         | 284 | 133  | 1.1E-01 | 2.4E-02 | 8.7E+07 | 4.9  | 3.5E-06 | 1.1E-06 | 3.5E-07 | conf | conf | 1.4E-01 | 2.3E-01 | 8.2E+02 | -7.73 | -7.71 | -9.23  | -4.69 | 0.36 | 0.0% | 0.0%    | 4.5E-11 |
| 356 | 420-46-2   | 1,1,1-trifluoroethane                                                                                | 84  | -152 | 9.9E-05 | 3.2E-04 | 5.5E+01 | 1.40 | 3.5E-06 | 3.5E-07 | 3.5E-07 | conf | conf | 1.3E-01 | 1.8E-01 | 6.4E+02 | -9.17 | -8.76 | -10.70 | -1.36 | 0.21 | 0.0% | 0.0%    | 7.1E-14 |
| 357 | 108-68-9   | 3,5-xyleneol                                                                                         | 122 | 25   | 1.1E-03 | 6.7E-01 | 4.1E+02 | 1.00 | 3.5E-06 | 1.1E-06 | 1.1E-06 | conf | conf | 1.2E-01 | 1.7E-01 | 5.8E+02 | -8.18 | -8.49 | -10.38 | -0.86 | 0.0% | 0.0% | 1.6E-20 |         |
| 358 | 80-07-9    | bis(4-chlorophenyl) sulfone                                                                          | 287 | 146  | 1.1E-04 | 3.5E-03 | 7.9E+03 | 1.40 | 3.5E-06 | 1.1E-06 | 3.5E-09 | conf | conf | 1.2E-01 | 1.7E-01 | 6.0E+02 | -9.17 | -6.04 | -7.10  | -2.63 | 0.22 | 0.0% | 0.0%    | 8.2E-11 |
| 359 | 6104-30-9  | N,N'-bis(isobutyl)ethylenediamine                                                                    | 174 | 241  | 1.8E-03 | 2.3E-02 | 2.1E+02 | 3.0  | 3.5E-06 | 1.1E-06 | 1.1E-06 | conf | conf | 1.8E-01 | 2.5E-01 | 9.3E+02 | -6.17 | -6.59 | -8.37  | -1.99 | 1.16 | 0.0% | 0.0%    | 3.7E-20 |
| 360 | 112-38-9   | undec-10-en-1-ol                                                                                     | 184 | 71   | 9.3E-01 | 3.4E-01 | 2.3E+04 | 4.9  | 3.5E-06 | 3.5E-07 | 3.5E-07 | conf | conf | 1.8E-01 | 2.5E-01 | 9.3E+02 | -6.17 | -6.59 | -8.37  | -1.99 | 1.16 | 0.0% | 0.0%    | 3.7E-20 |
| 361 | 2487-90-3  | trimethylsilane                                                                                      | 121 | -81  | 1.1E-04 | 1.3E-05 | 6.0E-02 | 3.40 | 3.5E-06 | 4.5E-07 | 1.1E-06 | conf | conf | 1.8E-01 | 2.5E-01 | 9.3E+02 | -6.17 | -6.59 | -8.37  | -1.99 | 1.16 | 0.0% | 0.0%    | 9.4E-38 |
| 362 | 7398-58-9  | N-methylideneacetamide                                                                               | 312 | 90   | 2.8E-03 | 3.2E-04 | 7.5E+08 | 1.40 | 3.5E-06 | 1.1E-06 | 3.5E-07 | conf | conf | 1.2E-01 | 1.7E-01 | 5.8E+02 | -8.12 | -8.28 | -9.66  | -4.39 | 1.29 | 0.0% | 0.0%    | 1.5E-14 |
| 363 | 116-15-4   | hexafluoroisopropanol                                                                                | 150 | -153 | 5.9E-05 | 1.1E-01 | 1.3E+02 | 1.40 | 3.5E-06 | 3.5E-07 | 3.5E-08 | conf | conf | 1.2E-01 | 1.7E-01 | 5.8E+02 | -8.26 | -8.94 | -11.69 | -1.17 | 0.29 | 0.0% | 0.0%    | 2.5E-51 |
| 364 | 380-10-1   | 3,5,5-trimethylpentanoic acid                                                                        | 158 | 37   | 6.1E-01 | 4.9E-01 | 2.2E+09 | 4.9  | 3.5E-06 | 3.5E-06 | 1.1E-06 | conf | conf | 2.1E-01 | 2.8E-01 | 1.1E+03 | -8.26 | -8.00 | -9.53  | -1.06 | 0.20 | 0.0% | 0.0%    | 5.4E-34 |
| 365 | 839-90-7   | trans-2-hydroxyethyl 1,3,5-triazinetrione                                                            | 241 | 241  | 1.2E-13 | 7.6E-01 | 1.2E+00 | 0.6  | 3.5E-06 | 3.5E-06 | 3.5E-06 | conf | conf | 2.1E-01 | 2.8E-01 | 1.1E+03 | -8.12 | -6.51 | -7.87  | -0.77 | 0.01 | 0.0% | 0.0%    | 4.6E-42 |
| 366 | 80-54-6    | 2,4-di-tert-butylbenzylpropionaldehyde                                                               | 204 | 46   | 4.8E-01 | 3.9E-03 | 2.6E+04 | 1.40 | 3.5E-06 | 3.5E-07 | 1.1E-07 | conf | conf | 1.5E-01 | 2.2E-01 | 7.7E+02 | -8.41 | -8.15 | -9.43  | -2.14 | 0.49 | 0.0% | 0.0%    | 1.0E-25 |
| 367 | 124-28-7   | dimethylsiloxane                                                                                     | 298 | 81   | 2.3E-02 | 7.5E-04 | 2.5E+08 | 10.1 | 3.5E-06 | 1.1E-06 | 3.5E-06 | conf | conf | 1.2E-01 | 1.7E-01 | 5.8E+02 | -8.38 | -8.49 | -10.30 | -0.88 | 0.66 | 0.0% | 0.0%    | 2.4E-20 |
| 368 | 100-20-9   | terephthaloyl dichloride                                                                             | 203 | 68   | 6.5E-01 | 1.1E-01 | 7.6E+00 | 1.40 | 3.5E-06 | 3.5E-06 | 1.1E-06 | conf | conf | 2.1E-01 | 2.8E-01 | 1.1E+03 | -8.05 | -7.89 | -9.53  | -0.30 | 0.30 | 0.0% | 0.0%    | 3.9E-45 |
| 369 | 1282-10-7  | pyvalic chloride                                                                                     | 121 | -48  | 4.3E-03 | 2.9E-03 | 7.8E+00 | 1.40 | 3.5E-06 | 3.2E-08 | 1.1E-06 | conf | conf | 1.2E-01 | 1.7E-01 | 5.8E+02 | -8.43 | -8.32 | -10.27 | -1.10 | 0.75 | 0.0% | 0.0%    | 1.6E-39 |
| 370 | 144-62-7   | oxalic acid                                                                                          | 90  | 83   | 7.5E-01 | 7.8E-05 | 1.8E-02 | 1.2  | 3.5E-06 | 4.7E-06 | 1.1E-06 | conf | conf | 2.1E-01 | 2.8E-01 | 1.1E+03 | -8.39 | -7.78 | -9.63  | -0.17 | 0.69 | 0.0% | 0.0%    | 6.6E-42 |
| 371 | 577-11-7   | dissolute sodium                                                                                     | 445 | 87   | 9.9E-03 | 1.3E-03 | 3.0E+02 | 1.40 | 3.5E-06 | 1.3E-07 | 6.6E-09 | conf | conf | 1.5E-01 | 2.1E-01 | 7.4E+02 | -5.84 | -6.16 | -7.82  | -1.44 | 0.26 | 0.0% | 0.0%    | 3.8E-20 |
| 372 | 120-80-9   | pyracetate                                                                                           | 10  | 46   | 1.5E-01 | 8.8E-04 | 1.1E+01 | 10.0 | 3.5E-06 | 1.1E-06 | 1.1E-06 | conf | conf | 2.0E-01 | 2.7E-01 | 1.0E+03 | -6.87 | -7.87 | -9.00  | -2.00 | 0.47 | 0.0% | 0.0%    | 1.0E-27 |
| 373 | 2432-99-7  | 11-aminododecanoic acid                                                                              | 203 | 304  | 2.1E-07 | 1.6E-01 | 6.9E+01 | 4.9  | 3.5E-06 | 1.1E-06 | 3.5E-07 | conf | conf | 1.9E-01 | 2.6E-01 | 9.6E+02 | -5.81 | -6.98 | -8.99  | -2.52 | 1.47 | 0.0% | 0.0%    | 1.1E-20 |
| 374 | 131-11-1   | dinitral phthalate                                                                                   | 194 | -23  | 6.2E-01 | 2.0E-04 | 4.4E+01 | 1.40 | 3.5E-06 | 7.9E-07 | 3.5E-07 | conf | conf | 1.8E-01 | 2.5E-01 | 9.3E+02 | -7.81 | -7.08 | -8.87  | -1.01 | 0.42 | 0.0% | 0.0%    | 1.4E-29 |
| 375 | 26533-78-4 | tris(trimethylsilyl) phosphite                                                                       | 689 | 317  | 1.6E-15 | 2.8E-13 | 1.1E+20 | 1.40 | 3.5E-06 | 1.1E-06 | 1.1E-06 | conf | conf | 1.4E-01 | 2.1E-01 | 8.1E+02 | -8.30 | -8.18 | -9.31  | -1.18 | 0.88 | 0.0% | 0.0%    | 8.4E-37 |
| 376 | 2316-51-5  | l-menthyl                                                                                            | 156 | -6   | 1.0E-06 | 9.4E-02 | 2.4E+03 | 1.40 | 3.5E-06 | 3.5E-07 | 3.5E-07 | conf | conf | 1.4E-01 | 2.2E-01 | 8.0E+02 | -7.21 | -6.97 | -8.53  | -1.88 | 0.13 | 0.0% | 0.0%    | 6.0E-23 |
| 377 | 540-91-5   | dichloromethylcyclohexanediol                                                                        | 345 | 45   | 4.7E-03 | 1.7E-01 | 1.2E+09 | 1.40 | 3.5E-06 | 3.5E-06 | 3.5E-06 | conf | conf | 1.3E-01 | 1.9E-01 | 5.3E+02 | -8.06 | -7.85 | -9.06  | -4.59 | 0.35 | 0.0% | 0.0%    | 6.0E-11 |
| 378 | 1367-84-5  | tri(2-chloro-1-methylethyl) phosphite                                                                | 328 | 72   | 7.6E-03 | 3.0E-01 | 7.8E+02 | 1.40 | 3.5E-06 | 3.5E-07 | 3.5E-07 | conf | conf | 1.4E-01 | 2.1E-01 | 8.1E+02 | -7.19 | -6.52 | -7.89  | -1.39 | 0.29 | 0.0% | 0.0%    | 6.7E-07 |
| 379 | 29329-71-3 | (1-hydroxyethoxy)bis(phosphonic acid, sodium salt)                                                   | 229 | 87   | 9.9E-03 | 1.6E-03 | 3.0E+02 | 1.40 | 3.5E-06 | 1.3E-07 | 6.6E-09 | conf | conf | 1.4E-01 | 2.0E-01 | 7.1E+02 | -5.87 | -6.16 | -7.83  | -4.09 | 0.50 | 0.0% | 0.0%    | 4.7E-26 |
| 380 | 112-29-0   | methyl palmitate                                                                                     | 270 | 245  | 6.2E-02 | 1.8E-02 | 2.5E+02 | 1.40 | 3.5E-06 | 3.5E-06 | 3.5E-06 | conf | conf | 1.4E-01 | 2.1E-01 | 8.1E+02 | -7.58 | -7.52 | -8.90  | -1.01 | 0.51 | 0.0% | 0.0%    | 1.0E-44 |
| 381 | 95-51-2    | 2-chloroethanol                                                                                      | 128 | 24   | 3.1E-01 | 1.8E-03 | 5.2E+01 | 3.0  | 3.5E-06 | 2.2E-05 | 3.5E-07 | conf | conf | 1.4E-01 | 1.5E-01 | 5.3E-02 | -5.65 | -6.09 | -7.04  | -1.96 | 0.73 | 0.0% | 0.0%    | 2.1E-13 |
| 382 | 108-46-3   | resorcinol                                                                                           | 110 | 46   | 1.6E-02 | 3.3E-05 | 1.1E+01 | 9.6  | 3.5E-06 | 5.1E-08 | 1.1E-06 | conf | conf | 1.2E-01 | 1.7E-01 | 6.2E+02 | -8.51 | -6.25 | -7.58  | -4.42 | 0.73 | 0.0% | 0.0%    | 1.4E-18 |
| 383 | 25021-41-6 | Methyl dec-8-enoate                                                                                  | 383 | 383  | 1.1E-01 | 1.1E-01 | 1.1E+01 | 1.40 | 3.5E-06 | 1.1E-06 | 6.6E-16 | conf | conf | 1.4E-01 | 2.1E-01 | 8.1E+02 | -6.96 | -6.96 | -8.30  | -1.18 | 0.88 | 0.0% | 0.0%    | 8.4E-37 |
| 384 | 505-328    | 3,7,11,15-tetramethylheptadec-1-en-3-ol                                                              | 297 | 70   | 1.9E-03 | 8.1E-02 | 1.7E+08 | 1.40 | 3.5E-06 | 3.5E-07 | 1.1E-07 | conf | conf | 1.1E-01 | 1.5E-01 | 5.2E-02 | -7.85 | -8.06 | -8.53  | -4.27 | 0.94 | 0.0% | 0.0%    | 5.9E-10 |
| 385 | 7680-73-1  | 1-methylpyridinium chloride                                                                          | 87  | 97   | 9.9E-03 | 9.9E-04 | 3.0E+02 | 1.40 | 3.5E-06 | 1.3E-07 | 6.6E-09 | conf | conf | 1.4E-01 | 1.9E-01 | 6.8E+02 | -5.90 | -6.20 | -7.84  | -1.84 | 0.64 | 0.0% | 0.0%    | 4.6E-18 |
| 386 | 100-02-7   | 4-antipyrone                                                                                         | 138 | 82   | 1.9E-02 | 3.8E-04 | 8.1E+01 | 7.2  | 3.5E-06 | 2.2E-07 | 3.5E-07 | conf | conf | 1.3E-01 | 1.9E-01 | 5.3E+02 | -8.02 | -6.15 | -7.20  | -0.31 | 0.58 | 0.0% | 0.0%    | 1.8E-14 |
| 387 | 629-96-9   | icosan-1-ol                                                                                          | 299 | 105  | 6.7E-05 | 9.0E-04 | 5.0E+08 | 1.40 | 3.5E-06 | 1.1E-06 | 1.1E-06 | conf | conf | 1.4E-01 | 1.5E-01 | 5.3E-02 | -7.90 | -8.25 | -8.63  | -5.51 | 0.50 | 0.0% | 0.0%    | 4.0E-06 |
| 388 | 75-20-3    | chloroethane                                                                                         | 65  | -111 | 6.2E-05 | 3.1E-03 | 8.8E+01 | 1.40 | 3.5E-06 | 1.1E-06 | 1.1E-06 | conf | conf | 1.4E-01 | 1.5E-01 | 5.3E-02 | -7.90 | -8.25 | -8.63  | -5.51 | 0.50 | 0.0% | 0.0%    | 4.0E-06 |
| 389 | 22042-96-2 | [[[bisphosphonothioimino]bis[ethylenetriamino]bis[methylthio]]tetrakis(phosphonic acid, sodium salt) | 595 | 87   | 9.9E-03 | 4.1E-03 | 3.0E+02 | 1.40 | 3.5E-06 | 1.3E-07 | 6.6E-09 | conf | conf | 1.4E-01 | 1.9E-01 | 6.8E+02 | -5.90 | -6.20 | -7.84  | -1.84 | 0.64 | 0.0% | 0.0%    | 4.6E-18 |
| 390 | 531-66-    |                                                                                                      |     |      |         |         |         |      |         |         |         |      |      |         |         |         |       |       |        |       |      |      |         |         |

|     |             |                                                                                                                |     |         |         |          |         |         |         |         |         |      |         |         |         |         |       |       |        |       |      |      |         |         |
|-----|-------------|----------------------------------------------------------------------------------------------------------------|-----|---------|---------|----------|---------|---------|---------|---------|---------|------|---------|---------|---------|---------|-------|-------|--------|-------|------|------|---------|---------|
| 525 | 108-32-7    | propylene carbonate                                                                                            | 102 | 5.6E-06 | 9.6E-02 | 1.2E-04  | 1.40    | 3.5E-06 | 3.5E-06 | 1.1E-06 | conf    | conf | 1.1E-01 | 1.5E-01 | 5.5E-02 | -8.31   | 8.19  | -9.75 | -1.41  | 1.08  | 0.0% | 0.0% | 5.2E-33 |         |
| 526 | 6386-64-1   | 4-chloro-2,5-dimethoxyaniline                                                                                  | 79  | 1.6E-03 | 1.2E-03 | 7.4E-01  | 1.33    | 3.5E-06 | 4.0E-07 | 1.1E-06 | conf    | conf | 7.1E-01 | 9.8E-01 | 3.6E-02 | -8.24   | 7.07  | -6.27 | -0.39  | 0.29  | 0.0% | 0.0% | 3.6E-27 |         |
| 527 | 2893-789    | troloxolone sodium                                                                                             | 220 | 87      | 9.9E-03 | 1.55E-03 | 3.0E-04 | 1.40    | 3.5E-06 | 1.3E-07 | 6.6E-09 | conf | conf    | 7.8E-02 | 1.1E-01 | 3.9E-01 | -6.13 | 6.44  | -8.09  | -2.56 | 1.42 | 0.0% | 0.0%    | 1.4E-15 |
| 528 | 109-61-5    | propryl chloroformate                                                                                          | 123 | 57      | 2.6E-03 | 6.5E-03  | 1.0E-04 | 1.40    | 3.5E-06 | 3.5E-06 | 1.1E-06 | conf | conf    | 1.0E-03 | 1.4E-01 | 5.2E-02 | -9.29 | 9.06  | -10.68 | -8.88 | 1.69 | 0.0% | 0.0%    | 1.0E-36 |
| 529 | 288-13-1    | pyrazole                                                                                                       | 65  | 3.3E-01 | 4.2E-03 | 1.1E-02  | 2.5     | 3.5E-06 | 4.0E-07 | 1.1E-06 | conf    | conf | 7.1E-01 | 9.8E-01 | 3.6E-02 | -8.24   | 7.07  | -6.27 | -0.39  | 0.29  | 0.0% | 0.0% | 1.0E-37 |         |
| 530 | 142-16-5    | isobutyl (3S)-2-methylthiothiophenyl malate                                                                    | 341 | 29      | 2.6E-01 | 9.8E-03  | 8.7E-07 | 1.40    | 3.5E-06 | 3.5E-07 | 1.1E-07 | conf | conf    | 6.1E-02 | 8.5E-02 | 2.9E-02 | -9.00 | 8.85  | -10.80 | -1.53 | 1.18 | 0.0% | 0.0%    | 2.9E-40 |
| 531 | 506-93-4    | guanidinium nitrate                                                                                            | 122 | 87      | 9.9E-03 | 8.4E-02  | 3.0E-02 | 1.40    | 3.5E-06 | 1.3E-07 | 6.6E-09 | conf | conf    | 7.8E-02 | 1.1E-01 | 3.9E-02 | -6.15 | 6.45  | -8.09  | -0.88 | 0.97 | 0.0% | 0.0%    | 3.5E-25 |
| 532 | 14433-76-2  | N,N-dimethyldecane-1-amine                                                                                     | 189 | 61      | 1.1E-01 | 1.3E-01  | 2.8E-03 | 2.5     | 3.5E-06 | 4.0E-07 | 1.1E-06 | conf | conf    | 7.1E-01 | 9.8E-01 | 3.6E-02 | -8.24 | 7.07  | -6.27  | -0.39 | 0.29 | 0.0% | 0.0%    | 2.1E-23 |
| 533 | 103-50-4    | diisobutyl ether                                                                                               | 198 | 56      | 2.9E-01 | 1.7E-01  | 3.0E-03 | 1.40    | 3.5E-06 | 1.1E-06 | 3.5E-07 | conf | conf    | 9.3E-02 | 1.3E-01 | 4.8E-02 | -8.49 | 8.27  | -9.50  | -2.56 | 5.00 | 0.0% | 0.0%    | 1.6E-23 |
| 534 | 77-90-7     | isobutyl (2S)-2-methylthiothiophenyl malate                                                                    | 194 | 65      | 1.1E-01 | 1.3E-01  | 2.8E-03 | 2.5     | 3.5E-06 | 4.0E-07 | 1.1E-06 | conf | conf    | 7.1E-01 | 9.8E-01 | 3.6E-02 | -8.24 | 7.07  | -6.27  | -0.39 | 0.29 | 0.0% | 0.0%    | 1.9E-23 |
| 535 | 83261-15-8  | isobutyl (3S)-2-chloropropionate                                                                               | 165 | 39      | 2.2E-02 | 1.2E-01  | 2.8E-02 | 1.40    | 3.5E-06 | 3.5E-06 | 1.1E-06 | conf | conf    | 9.8E-02 | 1.4E-01 | 5.0E-02 | -9.33 | 9.12  | -10.28 | -2.38 | 0.36 | 0.0% | 0.0%    | 8.9E-40 |
| 536 | 14806-75-5  | tris(2-hydroxyethyl)ammonium acetate                                                                           | 209 | 87      | 9.9E-03 | 1.4E-03  | 3.0E-02 | 1.40    | 3.5E-06 | 1.3E-07 | 6.6E-09 | conf | conf    | 7.8E-02 | 1.1E-01 | 3.8E-02 | -6.15 | 6.45  | -8.10  | -0.60 | 0.27 | 0.0% | 0.0%    | 6.8E-27 |
| 537 | 1477-55-0   | m-phenylenedibis(2-methylthiothiophenyl malate)                                                                | 180 | 60      | 1.0E-01 | 2.6E-03  | 1.4E-02 | 9.4     | 3.5E-06 | 3.5E-07 | 1.1E-06 | conf | conf    | 8.8E-02 | 1.3E-01 | 4.7E-02 | -8.34 | 8.19  | -9.50  | -2.56 | 5.00 | 0.0% | 0.0%    | 6.4E-25 |
| 538 | 106-99-4    | 1,2-dibromothane                                                                                               | 188 | 39      | 1.5E-03 | 3.7E-03  | 1.0E-02 | 1.40    | 3.5E-06 | 1.4E-06 | 1.1E-07 | conf | conf    | 6.0E-02 | 8.4E-02 | 2.9E-02 | -8.61 | 8.30  | -10.17 | -1.72 | 0.70 | 0.0% | 0.0%    | 6.8E-34 |
| 539 | 110-97-4    | 1,1'-mimodipropene-2-ol                                                                                        | 133 | 26      | 1.7E-01 | 1.2E-06  | 1.1E-01 | 9.0     | 3.5E-06 | 3.4E-07 | 3.5E-06 | conf | conf    | 8.7E-02 | 1.2E-01 | 4.4E-02 | -6.17 | 6.95  | -8.71  | -3.31 | 0.47 | 0.0% | 0.0%    | 1.8E-33 |
| 540 | 85-45-4     | phthalic acid                                                                                                  | 147 | 177     | 1.4E-03 | 3.4E-03  | 7.5E-03 | 9.3     | 3.5E-06 | 3.5E-07 | 1.1E-06 | conf | conf    | 9.8E-02 | 1.4E-01 | 5.0E-02 | -9.33 | 9.12  | -10.28 | -2.38 | 0.36 | 0.0% | 0.0%    | 2.2E-24 |
| 541 | 601-20-1    | sallylsalicylate                                                                                               | 119 | 54      | 3.7E-01 | 1.5E-01  | 4.3E-01 | 6.9     | 3.5E-06 | 1.1E-05 | 3.5E-06 | conf | conf    | 1.0E-02 | 1.4E-01 | 5.0E-02 | -8.22 | 8.94  | -10.34 | -1.49 | 0.32 | 0.0% | 0.0%    | 6.5E-37 |
| 542 | 149-73-5    | transethyl orthoformate                                                                                        | 166 | 135     | 4.0E-03 | 6.0E-03  | 9.3E-01 | 2.0     | 3.5E-06 | 1.2E-06 | 3.5E-07 | conf | conf    | 9.7E-02 | 1.4E-01 | 5.0E-02 | -9.39 | 7.83  | -9.78  | 1.51  | 1.42 | 0.0% | 0.0%    | 3.6E-30 |
| 543 | 86-56-6     | 4-chloro-u,u-a-trifluorothiolane                                                                               | 181 | 30      | 9.1E-02 | 4.1E-01  | 4.0E-03 | 1.40    | 3.5E-06 | 1.1E-07 | 3.5E-08 | conf | conf    | 5.9E-02 | 8.2E-02 | 2.8E-02 | -4.66 | 9.00  | -11.55 | -2.47 | 0.39 | 0.0% | 0.0%    | 9.8E-39 |
| 544 | 2524-03-0   | 4-methylthio phosphorothiothioate                                                                              | 161 | 98      | 4.0E-02 | 3.2E-03  | 2.5E-04 | 1.40    | 3.5E-06 | 1.1E-06 | 1.1E-06 | conf | conf    | 9.2E-02 | 1.3E-01 | 4.7E-02 | -8.90 | 8.67  | -10.33 | -0.33 | 0.39 | 0.0% | 0.0%    | 1.0E-35 |
| 545 | 141-79-7    | 4-methylthio 3-m-2-one                                                                                         | 98  | 24      | 1.6E-03 | 7.4E-03  | 2.3E-01 | 1.40    | 3.5E-06 | 1.1E-06 | 1.1E-06 | conf | conf    | 9.1E-02 | 1.3E-01 | 4.7E-02 | -8.98 | 8.74  | -10.07 | -0.69 | 0.20 | 0.0% | 0.0%    | 2.9E-41 |
| 546 | 4454-05-1   | 3,4-dihydro-2-methoxy-2H-pyran                                                                                 | 114 | 45      | 2.8E-03 | 1.9E-01  | 7.6E-04 | 1.40    | 3.5E-06 | 1.1E-06 | 3.5E-07 | conf | conf    | 9.2E-02 | 1.3E-01 | 4.7E-02 | -8.78 | 8.52  | -9.99  | -1.54 | 1.09 | 0.0% | 0.0%    | 8.0E-34 |
| 547 | 248-90-0    | 3,2-dimethylcta-1,6-diene                                                                                      | 138 | 45      | 6.7E-02 | 2.5E-07  | 7.6E-04 | 1.40    | 3.5E-06 | 1.1E-06 | 3.5E-07 | conf | conf    | 6.3E-02 | 8.8E-02 | 3.1E-02 | -9.79 | 8.49  | -12.43 | -2.80 | 0.26 | 0.0% | 0.0%    | 2.5E-43 |
| 548 | 128-39-2    | 3,2-difert-butylphenol                                                                                         | 176 | 77      | 9.4E-01 | 1.3E-01  | 1.9E-04 | 1.13    | 3.5E-06 | 3.5E-06 | 1.1E-06 | conf | conf    | 8.4E-02 | 1.2E-01 | 4.3E-02 | -9.33 | 9.14  | -10.31 | -0.73 | 0.52 | 0.0% | 0.0%    | 1.2E-37 |
| 549 | 24800-44-0  | [[methylthio]methyl(mimido)bis(phen-2-yl)bisphosphonate]                                                       | 192 | 46      | 6.4E-02 | 2.2E-04  | 3.2E-01 | 1.40    | 3.5E-06 | 3.5E-07 | 3.5E-07 | conf | conf    | 8.4E-02 | 1.2E-01 | 4.3E-02 | -9.09 | 6.75  | -8.65  | 0.74  | 0.60 | 0.0% | 0.0%    | 2.7E-41 |
| 550 | 526-98-7    | 1-ethoxy-2-hydroxy-3-oxo-1,4-dioxane                                                                           | 158 | 158     | 8.1E-08 | 2.0E-05  | 8.9E-04 | 1.6     | 3.5E-06 | 3.5E-06 | 1.1E-06 | conf | conf    | 9.7E-02 | 1.4E-01 | 5.0E-02 | -9.39 | 7.83  | -9.78  | 1.51  | 1.42 | 0.0% | 0.0%    | 3.6E-30 |
| 551 | 80-09-1     | 4,4'-sulphonyldiphenol                                                                                         | 250 | 176     | 6.3E-08 | 2.0E-03  | 4.5E-01 | 7.7     | 3.5E-06 | 7.4E-06 | 3.5E-07 | conf | conf    | 5.7E-02 | 8.0E-02 | 2.8E-02 | -6.83 | 6.39  | -7.39  | -1.78 | 0.87 | 0.0% | 0.0%    | 5.6E-16 |
| 552 | 52829-07-9  | bis(2,2,6,6-tetramethyl-4-piperidyl) sebacate                                                                  | 481 | 211     | 5.0E-08 | 1.3E-01  | 3.2E-06 | 9.9     | 3.5E-06 | 1.1E-06 | 3.5E-07 | conf | conf    | 6.5E-02 | 9.0E-02 | 3.2E-02 | -7.85 | 8.50  | -9.44  | -2.31 | 0.43 | 0.0% | 0.0%    | 1.2E-24 |
| 553 | 5696-52-0   | 5-chloro-2-[4-(4-dichlorophenoxy)aniline                                                                       | 289 | 137     | 2.3E-04 | 1.4E-02  | 1.7E-04 | 2.8     | 3.5E-06 | 1.1E-06 | 3.5E-08 | conf | conf    | 9.2E-02 | 1.3E-01 | 4.7E-02 | -8.70 | 8.49  | -9.65  | -2.04 | 0.58 | 0.0% | 0.0%    | 7.1E-28 |
| 554 | 99-88-7     | 4-isopropylaniline                                                                                             | 135 | 40      | 1.3E-01 | 1.3E-01  | 2.5E-03 | 1.40    | 3.5E-06 | 1.1E-06 | 3.5E-07 | conf | conf    | 9.2E-02 | 1.3E-01 | 4.7E-02 | -8.70 | 8.49  | -9.65  | -2.04 | 0.58 | 0.0% | 0.0%    | 7.1E-28 |
| 555 | 24549-06-2  | 6-ethyl-2-isuladine                                                                                            | 135 | 40      | 1.3E-01 | 1.3E-01  | 2.5E-03 | 1.40    | 3.5E-06 | 1.1E-06 | 3.5E-07 | conf | conf    | 9.2E-02 | 1.3E-01 | 4.7E-02 | -8.70 | 8.49  | -9.65  | -2.04 | 0.58 | 0.0% | 0.0%    | 7.1E-28 |
| 556 | 4193-55-9   | dichloro-4,4'-bis(4-anilino-1-[4-bis(2-hydroxythio)amino]-1,3,5-triazine-2-[4-amino]isobenzene-2'-disulphonate | 961 | 87      | 9.9E-03 | 6.6E-03  | 3.0E-02 | 1.40    | 3.5E-06 | 1.3E-07 | 6.6E-09 | conf | conf    | 7.8E-02 | 1.0E-01 | 3.6E-02 | -6.15 | 6.47  | -8.14  | -0.61 | 0.64 | 0.0% | 0.0%    | 2.8E-27 |
| 557 | 617-80-1    | 1,2,3,4-tetrahydro-1H-benzimidazole-2-one                                                                      | 136 | 33      | 1.7E-02 | 3.2E-02  | 2.4E-03 | 1.40    | 3.5E-06 | 1.1E-06 | 1.1E-06 | conf | conf    | 9.2E-02 | 1.3E-01 | 4.7E-02 | -8.07 | 7.90  | -9.35  | -2.54 | 0.38 | 0.0% | 0.0%    | 1.1E-22 |
| 558 | 93-84-5     | 1,3-dihydro-4-methyl-2H-benzimidazole-2-one                                                                    | 136 | 33      | 1.7E-02 | 3.2E-02  | 2.4E-03 | 1.40    | 3.5E-06 | 1.1E-06 | 1.1E-06 | conf | conf    | 9.2E-02 | 1.3E-01 | 4.7E-02 | -8.07 | 7.90  | -9.35  | -2.54 | 0.38 | 0.0% | 0.0%    | 1.1E-22 |
| 559 | 1003-52-7   | 4-methylazelaic-5-carboxitrile                                                                                 | 18  | 16      | 9.6E-01 | 1.5E-03  | 2.0E-04 | 1.40    | 3.5E-06 | 1.1E-06 | 3.5E-07 | conf | conf    | 9.2E-02 | 1.3E-01 | 4.7E-02 | -8.20 | 7.99  | -9.41  | -0.34 | 0.30 | 0.0% | 0.0%    | 1.1E-38 |
| 560 | 78-79-7     | lactonitrile                                                                                                   | 71  | 29      | 2.7E-01 | 1.5E-06  | 6.5E-01 | 1.40    | 3.5E-06 | 1.1E-06 | 3.5E-07 | conf | conf    | 9.2E-02 | 1.3E-01 | 4.7E-02 | -8.84 | 7.28  | -9.27  | -2.20 | 0.27 | 0.0% | 0.0%    | 2.1E-38 |
| 561 | 13043-55-5  | 7-methylpentadecanoic acid                                                                                     | 224 | 13      | 1.8E-04 | 1.4E-03  | 1.3E-04 | 1.3     | 3.5E-06 | 3.5E-07 | 1.1E-07 | conf | conf    | 9.8E-02 | 1.4E-01 | 5.0E-02 | -9.32 | 8.61  | -10.04 | -0.81 | 0.26 | 0.0% | 0.0%    | 6.8E-31 |
| 562 | 97-65-4     | itaconic acid                                                                                                  | 130 | 87      | 1.2E-02 | 4.5E-04  | 4.6E-01 | 3.9     | 3.5E-06 | 3.5E-06 | 1.1E-06 | conf | conf    | 9.4E-02 | 1.3E-01 | 4.8E-02 | -6.72 | 8.04  | -9.85  | -1.04 | 0.73 | 0.0% | 0.0%    | 1.2E-36 |
| 563 | 109-52-2    | valeric acid                                                                                                   | 130 | 87      | 1.2E-02 | 4.5E-04  | 4.6E-01 | 3.9     | 3.5E-06 | 3.5E-06 | 1.1E-06 | conf | conf    | 9.4E-02 | 1.3E-01 | 4.8E-02 | -6.72 | 8.04  | -9.85  | -1.04 | 0.73 | 0.0% | 0.0%    | 1.2E-36 |
| 564 | 79-94-7     | 2,2,6,6-tetramethoxy-4,4'-isopropoxydiphenol                                                                   | 544 | 206     | 4.6E-09 | 1.9E-03  | 1.6E-07 | 7.7     | 3.5E-06 | 4.1E-08 | 1.1E-06 | conf | conf    | 5.4E-02 | 7.6E-02 | 2.6E-02 | -7.52 | 8.43  | -8.52  | -3.43 | 0.73 | 0.0% | 0.0%    | 1.8E-13 |
| 565 | 37605-67-5  | 1,3,5-triazine-2,4,6-tris(1H-3H)triazine, compound with 1,3,5-triazine-2,4,6-triazine [1:1]                    | 255 | 87      | 9.9E-03 | 1.8E-03  | 3.0E-02 | 1.40    | 3.5E-06 | 1.3E-07 | 6.6E-09 | conf | conf    | 7.0E-02 | 9.7E-02 | 3.5E-02 | -6.18 | 6.49  | -8.14  | -0.31 | 0.64 | 0.0% | 0.0%    | 5.4E-33 |
| 566 | 6485-53-8   | 1,6-bis(2-methylthio)phenol                                                                                    | 134 | 45      | 2.8E-03 | 1.9E-01  | 7.6E-04 | 1.40    | 3.5E-06 | 1.1E-06 | 3.5E-07 | conf | conf    | 9.2E-02 | 1.3E-01 | 4.7E-02 | -8.78 | 8.52  | -9.99  | -1.54 | 1.09 | 0.0% | 0.0%    | 8.0E-34 |
| 567 | 15607-63-7  | 1-cyanallyl acetate                                                                                            | 125 | 158     | 1.6E-01 | 1.4E-04  | 1.5E-04 | 1.40    | 3.5E-06 | 3.5E-06 | 1.1E-06 | conf | conf    | 9.2E-02 | 1.3E-01 | 4.7E-02 | -8.01 | 8.82  | -10.29 | -3.62 | 0.63 | 0.0% | 0.0%    | 8.5E-22 |
| 568 | 2549-63-1   | tetradecyl methacrylate                                                                                        | 282 | 55      | 2.4E-02 | 1.3E-02  | 4.4E-04 | 1.40    | 3.5E-06 | 1.1E-06 | 3.5E-07 | conf | conf    | 5.7E-02 | 7.9E-02 | 2.8E-02 | -6.09 | 9.09  | -10.54 | -4.82 | 0.71 | 0.0% | 0.0%    | 1.5E-16 |
| 569 | 3543-19-1   | 5-amino-2,4,6-trinitrophenylsulfonic acid                                                                      | 159 | 232     | 1.0E-09 | 1.7E-02  | 1.4E-04 | 1.3     | 3.5E-06 | 3.5E-07 | 1.1E-06 | conf | conf    | 9.8E-02 | 1.4E-01 | 5.0E-02 | -9.32 | 8.61  | -10.04 | -0.81 | 0.26 | 0.0% | 0.0%    | 6.8E-31 |
| 570 | 75-08-1     | ethanethiol                                                                                                    | 62  | -102    | 6.9E-04 | 9.1E-01  | 1.9E-01 | 10.7    | 3.5E-06 | 2.8E-06 | 1.1E-06 | conf | conf    | 5.3E-02 | 7.4E-02 | 2.6E-02 | -9.30 | 8.98  | -11.09 | -2.95 | 0.93 | 0.0% | 0.0%    | 1.5E-31 |
| 571 | 3238-40-2   | form-2-ethylthio-1,3-dioxane                                                                                   | 158 | 158     | 8.1E-08 | 2.0E-05  | 8.9E-04 | 1.6     | 3.5E-06 | 3.5E-06 | 1.1E-06 | conf | conf    | 9.7E-02 | 1.4E-01 | 5.0E-02 | -9.39 | 7.83  | -9.78  | 1.51  | 1.42 | 0.0% | 0.0%    | 3.6E-30 |
| 572 | 167004-78-6 | 650-460-1                                                                                                      | 261 | 45      | 1.0     |          |         |         |         |         |         |      |         |         |         |         |       |       |        |       |      |      |         |         |

|     |            |                                                                                               |      |      |         |         |         |         |         |         |         |      |      |         |         |         |       |       |        |       |      |      |         |         |
|-----|------------|-----------------------------------------------------------------------------------------------|------|------|---------|---------|---------|---------|---------|---------|---------|------|------|---------|---------|---------|-------|-------|--------|-------|------|------|---------|---------|
| 708 | 122-52-1   | triethyl phosphite                                                                            | 166  | -21  | 3.7E-02 | 1.7E-09 | 5.5E-04 | 1.40    | 3.5E-06 | 3.5E-07 | 3.5E-07 | conf | conf | 4.2E-02 | 5.8E-06 | 2.1E-02 | -4.31 | -7.16 | -9.00  | -0.07 | 0.54 | 0.0% | 0.0%    | 1.5E-37 |
| 709 | 7179-62-8  | [2S]-9-octadecynylpropane-1,3-diamine                                                         | 122  | -02  | 1.5E-02 | 3.5E-04 | 3.0E-07 | 1.0     | 3.5E-06 | 3.5E-07 | 3.5E-07 | conf | conf | 4.2E-02 | 5.8E-06 | 2.1E-02 | -4.31 | -7.16 | -9.00  | -0.07 | 0.54 | 0.0% | 0.0%    | 4.8E-21 |
| 710 | 98-67-9    | trimethylselenophosphonic acid                                                                | 174  | 129  | 4.4E-05 | 2.5E-04 | 2.2E-10 | 1.0     | 3.5E-06 | 1.1E-05 | 3.5E-06 | conf | conf | 4.9E-02 | 6.9E-06 | 2.5E-02 | -7.42 | -9.00 | -10.61 | -0.82 | 0.67 | 0.0% | 0.0%    | 9.5E-45 |
| 711 | 121-43-7   | triethyl borate                                                                               | 104  | 83   | 2.0E-04 | 1.5E-06 | 1.3E-02 | 1.40    | 3.5E-06 | 1.1E-05 | 1.1E-06 | conf | conf | 4.6E-02 | 6.5E-04 | 2.4E-02 | -7.73 | -7.71 | -9.55  | -0.78 | 0.83 | 0.0% | 0.0%    | 2.2E-36 |
| 712 | 1241-84-7  | 2-ethylhexyl diethyl phosphate                                                                | 162  | -87  | 4.1E-03 | 9.0E-02 | 2.0E-06 | 1.40    | 3.5E-06 | 1.1E-05 | 1.1E-06 | conf | conf | 4.6E-02 | 6.5E-04 | 2.4E-02 | -7.73 | -7.71 | -9.55  | -0.78 | 0.83 | 0.0% | 0.0%    | 3.1E-22 |
| 713 | 2409-55-4  | 2-tert-butyl-4-cresol                                                                         | 164  | -52  | 1.7E-06 | 5.3E-02 | 9.3E-03 | 1.0     | 3.5E-06 | 3.5E-06 | 1.1E-06 | conf | conf | 4.4E-02 | 6.1E-06 | 2.2E-02 | -6.08 | -8.92 | -10.28 | -2.67 | 0.05 | 0.0% | 0.0%    | 7.6E-28 |
| 714 | 92-70-6    | triethyl 2-naphthoate                                                                         | 188  | 141  | 8.3E-06 | 4.8E-02 | 2.6E-03 | 1.0     | 3.5E-06 | 3.5E-06 | 3.5E-07 | conf | conf | 4.8E-02 | 6.6E-05 | 2.5E-02 | -7.42 | -8.22 | -11.02 | -1.26 | 0.25 | 0.0% | 0.0%    | 5.9E-37 |
| 715 | 106-22-9   | (triethyl)                                                                                    | 156  | -12  | 1.3E-04 | 3.5E-02 | 3.6E-03 | 1.40    | 3.5E-06 | 4.1E-07 | 1.0     | conf | conf | 4.0E-02 | 5.5E-02 | 2.0E-02 | -6.74 | -8.20 | -10.07 | -1.40 | 0.0% | 0.0% | 5.7E-26 |         |
| 716 | 2420-17-9  | 5,4-dihydroxyphenylindazole-2,4-dione                                                         | 192  | 198  | 5.1E-08 | 5.6E-03 | 1.0E-04 | 1.40    | 3.5E-06 | 1.1E-05 | 3.5E-06 | conf | conf | 4.8E-02 | 6.7E-05 | 2.5E-02 | -7.62 | -8.91 | -10.62 | -2.00 | 0.62 | 0.0% | 0.0%    | 3.9E-35 |
| 717 | 95-75-0    | 3,4-dichlorobenzylamine                                                                       | 154  | -54  | 1.1E-03 | 6.8E-03 | 1.3E-04 | 1.40    | 3.5E-06 | 3.5E-06 | 3.5E-07 | conf | conf | 4.8E-02 | 6.7E-05 | 2.5E-02 | -7.62 | -8.91 | -10.62 | -2.00 | 0.62 | 0.0% | 0.0%    | 3.9E-35 |
| 718 | 78-67-1    | 2,2-dimethyl-2-(2-oxopropionitrile                                                            | 164  | -44  | 1.9E-01 | 7.2E-03 | 7.4E-02 | 1.40    | 3.5E-06 | 3.5E-07 | 3.5E-07 | conf | conf | 4.0E-02 | 5.5E-05 | 2.0E-02 | -7.07 | -7.47 | -9.13  | -1.58 | 0.55 | 0.0% | 0.0%    | 1.8E-27 |
| 719 | 15307-99-7 | sodium [1,2-bis(dichlorophenyl)amino]phenylacetate                                            | 118  | 269  | 4.2E-12 | 4.6E-05 | 3.7E-04 | 1.4     | 3.5E-06 | 2.2E-05 | 3.5E-06 | conf | conf | 2.7E-02 | 3.8E-03 | 1.3E-02 | -5.71 | -6.54 | -7.48  | -1.47 | 0.64 | 0.0% | 0.0%    | 4.3E-18 |
| 720 | 991-27-5   | 3-aminophenol                                                                                 | 154  | -54  | 1.5E-03 | 9.3E-04 | 1.7E-04 | 1.40    | 3.5E-06 | 3.5E-06 | 1.1E-06 | conf | conf | 2.9E-02 | 4.0E-03 | 1.3E-02 | -6.74 | -8.20 | -10.07 | -1.40 | 0.0% | 0.0% | 1.1E-16 |         |
| 721 | 121-45-9   | triethyl phosphite                                                                            | 124  | -58  | 3.0E-03 | 8.7E-04 | 1.9E-01 | 1.40    | 3.5E-06 | 1.1E-05 | 1.1E-06 | conf | conf | 4.4E-02 | 6.2E-03 | 2.3E-02 | -8.80 | -8.58 | -9.92  | -0.08 | 0.39 | 0.0% | 0.0%    | 1.4E-46 |
| 722 | 106-48-9   | 4-chlorophenol                                                                                | 129  | -29  | 5.3E-01 | 1.1E-04 | 8.6E-03 | 1.40    | 3.5E-06 | 2.2E-05 | 3.5E-07 | conf | conf | 2.7E-02 | 3.8E-03 | 1.3E-02 | -7.12 | -6.85 | -7.48  | -1.02 | 0.53 | 0.0% | 0.0%    | 6.1E-17 |
| 723 | 1231-83-1  | 7-methyl-3-methoxy-1,6-octadecane                                                             | 115  | -45  | 1.2E-03 | 1.1E-01 | 7.6E-04 | 1.40    | 3.5E-06 | 1.1E-05 | 1.1E-06 | conf | conf | 4.4E-02 | 6.1E-03 | 2.3E-02 | -8.80 | -8.58 | -9.92  | -0.08 | 0.39 | 0.0% | 0.0%    | 1.0E-06 |
| 724 | 420-04-2   | cyanuric triazole                                                                             | 42   | -36  | 1.9E-03 | 2.5E-04 | 1.5E-01 | 1.0     | 3.5E-06 | 7.5E-05 | 3.5E-07 | conf | conf | 2.7E-02 | 3.8E-03 | 1.3E-02 | -5.98 | -6.67 | -7.67  | -1.04 | 0.73 | 0.0% | 0.0%    | 4.3E-16 |
| 725 | 108-74-7   | hexahydro-1,3,5-trimethyl-1,3,5-triazine                                                      | 129  | -17  | 8.1E-03 | 7.1E-03 | 5.1E-05 | 3.5E-06 | 3.5E-06 | 3.5E-06 | 3.5E-07 | conf | conf | 2.9E-02 | 4.0E-03 | 1.3E-02 | -7.02 | -8.95 | -10.13 | -2.16 | 0.86 | 0.0% | 0.0%    | 2.1E-30 |
| 726 | 116-37-0   | 1,1-isopropylidenedi(3-phenylenevinyl)poran-2-ol                                              | 344  | 175  | 6.8E-09 | 2.0E-03 | 1.1E-04 | 1.40    | 3.5E-06 | 3.5E-11 | 1.1E-07 | conf | conf | 3.7E-02 | 5.1E-06 | 1.9E-02 | -6.70 | -7.52 | -9.13  | -1.98 | 0.31 | 0.0% | 0.0%    | 8.8E-25 |
| 727 | 109-73-9   | butylamine                                                                                    | 73   | -59  | 1.3E-04 | 4.9E-05 | 6.8E-00 | 1.0     | 3.5E-06 | 4.1E-07 | 1.1E-06 | conf | conf | 4.0E-02 | 5.6E-06 | 2.0E-02 | -8.56 | -8.33 | -9.46  | -1.27 | 0.70 | 0.0% | 0.0%    | 6.2E-32 |
| 728 | 95-16-9    | benzothiazole                                                                                 | 138  | -57  | 9.8E-00 | 1.1E-03 | 1.5E-02 | 1.4     | 3.5E-06 | 4.8E-09 | 3.5E-07 | conf | conf | 2.7E-02 | 3.8E-03 | 1.3E-02 | -6.25 | -6.71 | -7.70  | -1.42 | 0.50 | 0.0% | 0.0%    | 1.6E-19 |
| 729 | 4511-42-6  | [3S-cis]-3,6-dimethyl-1,4-dioxane-2,5-dione                                                   | 144  | 26   | 2.1E-02 | 1.5E-07 | 4.5E-01 | 1.40    | 3.5E-06 | 3.5E-06 | 1.1E-06 | conf | conf | 4.6E-02 | 6.4E-06 | 2.4E-02 | -7.33 | -8.52 | -10.14 | -0.25 | 0.50 | 0.0% | 0.0%    | 1.1E-45 |
| 730 | 112-11-6   | isopropyl oleate                                                                              | 125  | -89  | 1.3E-03 | 2.3E-03 | 8.3E-08 | 1.40    | 3.5E-06 | 1.1E-05 | 3.5E-07 | conf | conf | 2.7E-02 | 3.8E-03 | 1.3E-02 | -8.67 | -8.83 | -9.73  | -1.49 | 0.78 | 0.0% | 0.0%    | 2.9E-12 |
| 731 | 54839-24-6 | 2-ethyl-1-methyl-ethyl acetate                                                                | 136  | -88  | 1.7E-02 | 1.6E-04 | 1.0E-01 | 1.40    | 3.5E-06 | 1.1E-05 | 1.1E-06 | conf | conf | 4.4E-02 | 6.1E-03 | 2.3E-02 | -8.84 | -8.65 | -9.87  | -0.12 | 0.24 | 0.0% | 0.0%    | 3.5E-08 |
| 732 | 126-58-9   | 2,2,2',2'-tetrakis(hydroxymethyl)-3,3'-oxydiprop-1-ol                                         | 254  | 192  | 2.3E-10 | 1.0E-06 | 2.5E-03 | 1.40    | 3.5E-06 | 1.1E-05 | 1.1E-06 | conf | conf | 4.4E-02 | 6.1E-03 | 2.3E-02 | -8.82 | -7.47 | -9.55  | -2.55 | 0.80 | 0.0% | 0.0%    | 1.6E-28 |
| 733 | 22818-40-2 | D-1,6-hydroxyphenylglycine                                                                    | 162  | -45  | 1.9E-03 | 2.5E-04 | 1.5E-01 | 1.0     | 3.5E-06 | 7.5E-05 | 3.5E-07 | conf | conf | 2.7E-02 | 3.8E-03 | 1.3E-02 | -5.98 | -6.67 | -7.67  | -1.04 | 0.73 | 0.0% | 0.0%    | 4.3E-16 |
| 734 | 10595-0-5  | N,N'-bis(1-dichlorobutylidene)-2,2'-imino(bis(amine))                                         | 267  | 1    | 8.3E-02 | 4.1E-01 | 4.3E-07 | 1.0E-06 | 3.5E-06 | 3.5E-06 | 1.1E-06 | conf | conf | 2.9E-02 | 4.1E-04 | 1.4E-02 | -6.33 | -9.21 | -9.92  | -2.95 | 0.27 | 0.0% | 0.0%    | 1.2E-23 |
| 735 | 38777-92-1 | N-butyl-2,2,6,6-tetramethylpiperidine-4-amine                                                 | 212  | 80   | 2.0E-01 | 1.6E-07 | 3.0E-02 | 1.0     | 3.5E-06 | 3.5E-07 | 3.5E-07 | conf | conf | 3.8E-02 | 5.3E-06 | 1.9E-02 | -6.73 | -7.46 | -9.13  | -1.52 | 0.74 | 0.0% | 0.0%    | 5.8E-28 |
| 736 | 74-91-1    | dibromomethane                                                                                | 174  | -52  | 6.5E-03 | 1.1E-04 | 3.3E-01 | 1.40    | 3.5E-06 | 2.0E-08 | 1.1E-07 | conf | conf | 2.6E-02 | 3.7E-03 | 1.3E-02 | -9.02 | -8.68 | -10.66 | -1.13 | 0.22 | 0.0% | 0.0%    | 1.9E-42 |
| 737 | 751-83-7   | 3-methyl-5-(2,6,6-trimethyl-1-cyclohexen-1-yl)-2,4-pentadienyl(triphenylphosphonium) sulphate | 1027 | 87   | 9.9E-03 | 1.1E-03 | 3.0E-02 | 1.40    | 3.5E-06 | 1.3E-07 | 6.6E-09 | conf | conf | 3.3E-02 | 4.6E-07 | 1.7E-02 | -6.48 | -8.81 | -8.47  | -4.22 | 0.64 | 0.1% | 0.0%    | 6.3E-10 |
| 738 | 103-09-1   | 2-ethyl-1-methyl acetate                                                                      | 127  | -30  | 1.9E-01 | 1.8E-01 | 2.5E-02 | 1.40    | 3.5E-06 | 1.1E-05 | 1.1E-06 | conf | conf | 4.2E-02 | 5.9E-06 | 2.4E-02 | -7.84 | -9.11 | -10.00 | -0.83 | 0.42 | 0.0% | 0.0%    | 3.7E-41 |
| 739 | 21542-96-1 | N,N-dimethylacrylamide                                                                        | 354  | 117  | 2.1E-04 | 5.0E-06 | 2.2E-10 | 1.0     | 3.5E-06 | 1.1E-05 | 3.5E-07 | conf | conf | 2.5E-02 | 3.5E-05 | 1.2E-02 | -8.61 | -8.51 | -9.50  | -1.83 | 2.15 | 0.0% | 0.0%    | 3.0E-16 |
| 740 | 17796-82-6 | N-cyclohexylmethylphthalimide                                                                 | 261  | 198  | 3.5E-03 | 1.0E-06 | 5.8E-03 | 1.40    | 3.5E-06 | 1.1E-05 | 3.5E-07 | conf | conf | 3.9E-02 | 5.5E-06 | 2.0E-02 | -7.09 | -8.13 | -9.69  | -2.27 | 0.51 | 0.0% | 0.0%    | 1.4E-26 |
| 741 | 78-51-3    | tri(2-butylmethyl) phosphate                                                                  | 186  | -86  | 1.4E-04 | 2.4E-02 | 1.0E-03 | 1.40    | 3.5E-06 | 1.1E-05 | 1.1E-06 | conf | conf | 4.2E-02 | 5.9E-06 | 2.4E-02 | -7.84 | -9.11 | -10.00 | -0.83 | 0.42 | 0.0% | 0.0%    | 3.7E-41 |
| 742 | 111-86-4   | octylamine                                                                                    | 129  | -10  | 1.3E-02 | 3.2E-02 | 6.3E-01 | 1.0     | 3.5E-06 | 5.0E-07 | 3.5E-07 | conf | conf | 3.6E-02 | 5.0E-06 | 1.8E-02 | -9.27 | -9.00 | -10.54 | -2.65 | 0.70 | 0.0% | 0.0%    | 8.3E-30 |
| 743 | 112-67-4   | palmitol triacetate                                                                           | 275  | -77  | 1.2E-03 | 1.3E-02 | 2.5E-04 | 1.40    | 3.5E-06 | 1.1E-05 | 3.5E-07 | conf | conf | 2.7E-02 | 3.8E-03 | 1.3E-02 | -5.98 | -6.67 | -7.67  | -1.04 | 0.73 | 0.0% | 0.0%    | 4.1E-44 |
| 744 | 5460-09-3  | sodium hydrogen 4-amino-5-hydroxyphenylacetate-2,7-disulphonate                               | 148  | -93  | 1.4E-03 | 2.4E-03 | 3.3E-01 | 1.40    | 3.5E-06 | 1.1E-05 | 1.1E-06 | conf | conf | 4.3E-02 | 5.7E-03 | 2.1E-02 | -8.02 | -8.91 | -9.78  | -1.57 | 0.32 | 0.0% | 0.0%    | 7.0E-07 |
| 745 | 97-36-9    | 2,4-dimethylacetoacetaldehyde                                                                 | 205  | 138  | 1.1E-03 | 7.5E-05 | 3.9E-01 | 0.6     | 3.5E-06 | 3.5E-07 | 1.1E-07 | conf | conf | 3.8E-02 | 5.3E-06 | 1.9E-02 | -6.24 | -7.12 | -9.01  | -2.28 | 0.91 | 0.0% | 0.0%    | 3.7E-22 |
| 746 | 36727-20-4 | 3,5-dimethylthianol chloride                                                                  | 173  | -60  | 1.6E-02 | 2.7E-03 | 1.0E-01 | 1.40    | 3.5E-06 | 1.1E-05 | 1.1E-06 | conf | conf | 4.2E-02 | 5.9E-06 | 2.4E-02 | -7.84 | -9.11 | -10.00 | -0.83 | 0.42 | 0.0% | 0.0%    | 3.7E-41 |
| 747 | 108-87-2   | methyldichloroacetate                                                                         | 98   | -74  | 5.5E-03 | 2.7E-01 | 3.9E-03 | 1.40    | 3.5E-06 | 2.1E-05 | 3.5E-07 | conf | conf | 2.5E-02 | 3.5E-05 | 1.2E-02 | -8.68 | -9.66 | -11.31 | -0.80 | 0.71 | 0.0% | 0.0%    | 1.6E-51 |
| 748 | 99-96-7    | 4-hydroxybenzoic acid                                                                         | 138  | 94   | 9.4E-04 | 1.2E-04 | 2.5E-01 | 4.6     | 3.5E-06 | 1.4E-06 | 1.1E-06 | conf | conf | 4.2E-02 | 5.9E-06 | 2.4E-02 | -7.86 | -8.90 | -9.77  | -1.40 | 0.52 | 0.0% | 0.0%    | 5.4E-36 |
| 749 | 108-45-2   | m phenylbenzoate                                                                              | 138  | 94   | 9.4E-04 | 1.2E-04 | 2.5E-01 | 4.6     | 3.5E-06 | 1.4E-06 | 1.1E-06 | conf | conf | 4.2E-02 | 5.9E-06 | 2.4E-02 | -7.86 | -8.90 | -9.77  | -1.40 | 0.52 | 0.0% | 0.0%    | 5.4E-36 |
| 750 | 105-56-6   | ethyl cyanacetate                                                                             | 113  | -11  | 2.9E-01 | 2.3E-04 | 1.0E-04 | 1.40    | 3.5E-06 | 1.1E-05 | 1.1E-06 | conf | conf | 4.4E-02 | 6.1E-03 | 2.3E-02 | -8.58 | -8.43 | -10.14 | -0.83 | 0.40 | 0.0% | 0.0%    | 1.0E-40 |
| 751 | 3137-72-6  | 15-naphthylene diisocyanate                                                                   | 210  | -77  | 4.6E-03 | 4.2E-02 | 2.3E-04 | 1.40    | 3.5E-06 | 1.1E-05 | 3.5E-06 | conf | conf | 3.7E-02 | 5.1E-06 | 1.9E-02 | -6.79 | -8.26 | -9.78  | -1.56 | 1.45 | 0.0% | 0.0%    | 4.2E-32 |
| 752 | 770-35-4   | 2-ethylhexyl propanoate-2-ol                                                                  | 171  | -7   | 7.8E-01 | 2.8E-03 | 3.3E-01 | 1.40    | 3.5E-06 | 1.1E-05 | 1.1E-06 | conf | conf | 4.4E-02 | 6.1E-03 | 2.3E-02 | -8.84 | -8.65 | -9.87  | -0.12 | 0.24 | 0.0% | 0.0%    | 3.5E-08 |
| 753 | 95-74-8    | 2,4-dichlorobenzene                                                                           | 161  | -4   | 4.6E-01 | 6.1E-01 | 6.8E-03 | 1.40    | 3.5E-06 | 1.1E-07 | 3.5E-08 | conf | conf | 2.7E-02 | 3.8E-03 | 1.3E-02 | -9.22 | -8.93 | -10.71 | -2.57 | 0.26 | 0.0% | 0.0%    | 1.5E-31 |
| 754 | 92-84-2    | phenol(1,2,2,2)                                                                               | 199  | -122 | 1.1E-04 | 6.6E-03 | 1.0E-01 | 1.40    | 3.5E-06 | 1.1E-05 | 1.1E-06 | conf | conf | 4.2E-02 | 5.9E-06 | 2.4E-02 | -7.84 | -9.11 | -10.00 | -0.83 | 0.42 | 0.0% | 0.0%    | 3.7E-41 |
| 755 | 85-40-5    | 1,2,3,6-tetrahydrophthalimide                                                                 | 151  | 172  | 1.6E-05 | 5.8E-04 | 2.0E-03 | 9.3     | 3.5E-06 | 3.5E-06 | 3.5E-07 | conf |      |         |         |         |       |       |        |       |      |      |         |         |

|     |            |                                                                                                                |      |       |          |          |          |         |         |         |         |      |      |          |          |          |        |       |        |       |       |      |         |         |         |
|-----|------------|----------------------------------------------------------------------------------------------------------------|------|-------|----------|----------|----------|---------|---------|---------|---------|------|------|----------|----------|----------|--------|-------|--------|-------|-------|------|---------|---------|---------|
| 891 | 109-83-1   | 2-methylaminoethanol                                                                                           | 75   | -36   | 1.11E-02 | 1.00E-06 | 7.01E-02 | 9.9     | 3.5E-06 | 3.5E-06 | 3.5E-06 | conf | conf | 3.0E-02  | 4.11E-06 | 1.55E-02 | -8.52  | 8.51  | -10.32 | -1.28 | 0.33  | 0.0% | 0.0%    | 1.9E-38 |         |
| 892 | 13879-25-4 | 2-methyl-2-(4-methylphenyl)pyridine                                                                            | 140  | -11   | 1.21E-02 | 1.18E-05 | 1.40E-01 | 3.5E-06 | 3.5E-06 | 3.5E-06 | 3.5E-06 | conf | conf | 1.57E-02 | 1.57E-02 | 1.11E-02 | -1.17  | -1.17 | -1.17  | -1.17 | 0.0%  | 0.0% | 1.5E-48 |         |         |
| 893 | 186817-80  | 609-097-1                                                                                                      | 202  | -28   | 1.12E-01 | 8.00E-02 | 4.2E-02  | 1.2E    | 3.5E-06 | 3.5E-06 | 3.5E-06 | conf | conf | 2.5E-02  | 4.00E-06 | 1.5E-02  | -0.94  | 8.92  | -10.41 | -1.24 | 0.59  | 0.0% | 0.0%    | 1.7E-39 |         |
| 894 | 67786-28   | tetrasodium 4,4'-bis[2-(bis(2-hydroxypropyl)amino)-6-(4-sulphatophenyl)amino]-1,3,5-triazin-2-ylamino]-sulfate | 1223 | 87    | 9.9E-03  | 8.48E-03 | 3.0E-02  | 1.40    | 3.5E-06 | 3.5E-06 | 3.5E-06 | conf | conf | 2.2E-02  | 3.0E-11  | 1.10E-02 | -6.66  | 6.69  | -8.66  | -0.63 | 0.58  | 0.0% | 0.0%    | 9.2E-31 |         |
| 895 | 872-84-2   | 3,3'-bis(2-hydroxypropyl)azobenzene                                                                            | 140  | -7    | 5.12E-02 | 1.88E-02 | 2.6E-02  | 1.40    | 3.5E-06 | 3.5E-06 | 3.5E-06 | conf | conf | 1.87E-02 | 1.20E-06 | 1.10E-02 | -6.66  | 6.69  | -8.66  | -0.63 | 0.58  | 0.0% | 0.0%    | 8.7E-35 |         |
| 896 | 1758-72    | 2-methyl-2-(4-methylphenyl)aminoethanol                                                                        | 87   | 9E-03 | 9.9E-03  | 3.0E-02  | 1.40     | 3.5E-06 | 3.5E-06 | 3.5E-06 | 3.5E-06 | conf | conf | 2.2E-02  | 3.0E-11  | 1.10E-02 | -6.66  | 6.69  | -8.66  | -0.63 | 0.58  | 0.0% | 0.0%    | 4.8E-43 |         |
| 897 | 85-68-7    | benzyl butyl phosphite                                                                                         | 112  | 61    | 5.9E-03  | 2.38E-03 | 6.0E-04  | 1.40    | 3.5E-06 | 3.5E-06 | 3.5E-06 | conf | conf | 2.3E-02  | 3.2E-11  | 1.10E-02 | -6.68  | 8.52  | -9.94  | -3.05 | 0.51  | 0.0% | 0.0%    | 3.5E-23 |         |
| 898 | 16111-42-9 | bis[2-ethylhexyl]peroxycarbonate                                                                               | 146  | 64    | 1.0E-04  | 1.30E-01 | 9.3E-04  | 1.40    | 3.5E-06 | 3.5E-06 | 3.5E-06 | conf | conf | 1.87E-02 | 2.35E-02 | 8.70E-02 | -8.78  | 8.78  | -9.17  | -0.48 | 0.0%  | 0.0% | 1.5E-31 |         |         |
| 899 | 894-86-0   | dimethyl (2,2'-bis-1H-indolyl-3,3'-diolate)                                                                    | 108  | 87    | 9.9E-03  | 2.11E-03 | 3.0E-02  | 1.40    | 3.5E-06 | 3.5E-06 | 3.5E-06 | conf | conf | 2.2E-02  | 3.0E-11  | 1.10E-02 | -6.68  | 7.00  | -8.65  | -4.00 | 0.64  | 0.0% | 0.0%    | 1.1E-22 |         |
| 900 | 599-64-1   | 4-(4-dimethylphenyl)-1,3,5-triazine                                                                            | 112  | 61    | 5.9E-03  | 2.38E-03 | 6.0E-04  | 1.40    | 3.5E-06 | 3.5E-06 | 3.5E-06 | conf | conf | 2.3E-02  | 3.2E-11  | 1.10E-02 | -6.68  | 8.52  | -9.94  | -3.05 | 0.51  | 0.0% | 0.0%    | 1.1E-20 |         |
| 901 | 55589-62-3 | 6-methyl-1,2,3-oxathiane-4(3H)-one-2,3-dioxide, potassium salt                                                 | 201  | 225   | 5.88E-09 | 8.88E-03 | 5.0E-03  | 8.2     | 3.5E-06 | 8.2E-07 | 3.5E-06 | conf | conf | 2.7E-02  | 3.88E-14 | 1.40E-02 | -6.64  | -7.75 | -6.63  | 0.36  | 0.64  | 0.0% | 0.0%    | 1.4E-46 |         |
| 902 | 4707-03-7  | 2-methylmethylpropylcarbamate                                                                                  | 134  | 86    | 1.7E-04  | 8.88E-05 | 8.5E-05  | 4.0     | 3.5E-06 | 3.5E-06 | 3.5E-06 | conf | conf | 2.9E-02  | 4.00E-15 | 1.50E-02 | -8.99  | 8.44  | -10.32 | 0.36  | 1.17  | 0.0% | 0.0%    | 7.7E-53 |         |
| 903 | 6209-76-3  | hexyl acetate                                                                                                  | 109  | 138   | 1.0E-03  | 1.18E-03 | 2.5E-03  | 1.40    | 3.5E-06 | 3.5E-06 | 3.5E-06 | conf | conf | 2.8E-02  | 3.88E-14 | 1.40E-02 | -6.64  | -8.52 | -9.17  | -0.48 | 0.0%  | 0.0% | 1.1E-22 |         |         |
| 904 | 4698-11-7  | 10-methyl-5H-dibenz[b,f]azepine                                                                                | 223  | 126   | 1.4E-01  | 1.18E-01 | 2.2E-03  | 0.8     | 3.5E-06 | 3.5E-06 | 3.5E-06 | conf | conf | 2.8E-02  | 3.88E-14 | 1.40E-02 | -6.64  | -7.75 | -9.96  | -9.86 | -2.70 | 0.80 | 0.0%    | 0.0%    | 7.4E-25 |
| 905 | 18845-90-2 | 4-bromo-1,2-dichlorobenzene                                                                                    | 226  | 37    | 7.2E-03  | 1.38E-01 | 5.5E-05  | 1.40    | 3.5E-06 | 3.5E-06 | 3.5E-06 | conf | conf | 1.8E-02  | 2.35E-02 | 8.90E-02 | -9.39  | -9.11 | -10.85 | -2.63 | 0.19  | 0.0% | 0.0%    | 3.6E-32 |         |
| 906 | 21232-52-3 | N-[3-amino-4-(methylthio)benzyl]N'-pyridin-2-yl-β-alanine                                                      | 184  | 206   | 1.1E-07  | 9.48E-01 | 8.70E-02 | 1.40    | 3.5E-06 | 3.5E-06 | 3.5E-06 | conf | conf | 2.8E-02  | 3.88E-14 | 1.40E-02 | -6.64  | -7.80 | -8.49  | -1.78 | 0.28  | 0.0% | 0.0%    | 1.4E-37 |         |
| 907 | 29518-11-4 | 4-phenylmorpholine-3-one                                                                                       | 177  | 102   | 1.1E-02  | 3.6E-02  | 3.5E-04  | 1.40    | 3.5E-06 | 3.5E-06 | 3.5E-06 | conf | conf | 2.8E-02  | 3.88E-14 | 1.40E-02 | -6.64  | -7.80 | -9.81  | -1.67 | 1.25  | 0.0% | 0.0%    | 1.3E-31 |         |
| 908 | 7334-84-3  | exo-1,7,7-trimethylbicyclo[2.2.1]hept-2-yl-methyl acetate                                                      | 122  | 54    | 1.4E-03  | 5.8E-04  | 1.40E-01 | 3.5E-06 | 3.5E-06 | 3.5E-06 | 3.5E-06 | conf | conf | 2.4E-02  | 3.88E-14 | 1.20E-02 | -9.12  | -9.12 | -10.72 | -2.82 | 0.20  | 0.0% | 0.0%    | 7.5E-30 |         |
| 909 | 682-09-7   | 2-bis(dihydroxyethyl)butan-1-ol                                                                                | 214  | 55    | 2.1E-02  | 3.0E-02  | 7.44E-01 | 1.40    | 3.5E-06 | 3.5E-06 | 3.5E-06 | conf | conf | 2.7E-02  | 3.88E-14 | 1.40E-02 | -6.66  | -8.06 | -9.87  | -2.26 | 0.38  | 0.0% | 0.0%    | 3.1E-43 |         |
| 910 | 112-02-7   | cetrimonium chloride                                                                                           | 230  | 213   | 3.7E-08  | 5.9E-03  | 1.5E-03  | 1.40    | 3.5E-06 | 4.6E-07 | 3.5E-06 | conf | conf | 2.5E-02  | 3.4E-02  | 1.2E-02  | -7.46  | -7.80 | -9.50  | -3.48 | 0.83  | 0.0% | 0.0%    | 4.3E-18 |         |
| 911 | 2842-59-8  | 2-chlorobenzoic acid                                                                                           | 158  | 95    | 1.6E-01  | 2.0E-03  | 9.8E-01  | 1.40    | 3.5E-06 | 3.5E-06 | 3.5E-07 | conf | conf | 2.7E-02  | 3.88E-14 | 1.40E-02 | -6.77  | -7.89 | -9.82  | -1.27 | 0.78  | 0.0% | 0.0%    | 1.3E-24 |         |
| 912 | 17689-77-9 | triazotomethylamine                                                                                            | 234  | -34   | 1.0E-01  | 3.7E-03  | 5.5E-01  | 1.40    | 3.5E-06 | 3.5E-06 | 3.5E-06 | conf | conf | 2.9E-02  | 4.00E-15 | 1.5E-02  | -8.98  | -8.85 | -10.40 | -0.37 | 0.92  | 0.0% | 0.0%    | 6.4E-47 |         |
| 913 | 1718-58-8  | chloromethylstyrylamine                                                                                        | 111  | -92   | 1.8E-04  | 3.0E-02  | 6.9E-02  | 1.40    | 3.5E-06 | 3.5E-06 | 3.5E-06 | conf | conf | 1.9E-02  | 2.7E-06  | 9.60E-02 | -10.18 | -9.50 | -11.54 | -4.48 | 0.26  | 0.0% | 0.0%    | 6.7E-67 |         |
| 914 | 1333-07-9  | toluenesulfonylacetate                                                                                         | 171  | 91    | 8.1E-03  | 3.8E-01  | 3.0E-01  | 1.40    | 3.5E-06 | 3.5E-07 | 3.5E-06 | conf | conf | 2.4E-02  | 3.4E-02  | 1.20E-02 | -6.65  | -7.39 | -9.19  | -0.78 | 0.28  | 0.0% | 0.0%    | 1.4E-37 |         |
| 915 | 24605-36-5 | sodium hydrogen 2-aminobenzoate-1,4-disulphonate                                                               | 297  | 87    | 9.9E-03  | 2.11E-03 | 3.0E-02  | 1.40    | 3.5E-06 | 3.5E-06 | 3.5E-06 | conf | conf | 2.2E-02  | 2.9E-06  | 1.0E-02  | -6.70  | -7.01 | -8.67  | -1.84 | 0.64  | 0.0% | 0.0%    | 8.7E-23 |         |
| 916 | 107-15-7   | prop-2-en-1-ol                                                                                                 | 56   | -49   | 1.0E-03  | 3.7E-05  | 3.8E-01  | 3.5E-06 | 3.5E-06 | 2.9E-06 | 3.5E-06 | conf | conf | 2.8E-02  | 3.88E-14 | 1.40E-02 | -6.65  | -8.77 | -10.22 | -4.43 | 0.41  | 0.0% | 0.0%    | 5.0E-29 |         |
| 917 | 2702-72-9  | sodium 2,4-dichloroacetate                                                                                     | 243  | 87    | 9.9E-03  | 1.7E-03  | 3.0E-02  | 1.40    | 3.5E-06 | 3.5E-06 | 3.5E-06 | conf | conf | 2.1E-02  | 2.9E-06  | 1.0E-02  | -6.70  | -7.01 | -8.67  | -0.76 | 1.00  | 0.0% | 0.0%    | 7.5E-30 |         |
| 918 | 2136-89-2  | alpha, zeta-tetrachlorobutane                                                                                  | 138  | 40    | 1.5E-03  | 7.7E-03  | 3.5E-04  | 1.40    | 3.5E-06 | 3.5E-06 | 3.5E-06 | conf | conf | 1.8E-02  | 2.35E-02 | 8.90E-02 | -9.22  | -8.95 | -10.45 | -4.33 | 0.64  | 0.0% | 0.0%    | 1.2E-47 |         |
| 919 | 79-29-4    | 2-chloropropane                                                                                                | 79   | -114  | 4.8E-04  | 4.38E-03 | 1.0E-02  | 1.40    | 3.5E-06 | 3.5E-07 | 3.5E-06 | conf | conf | 2.8E-02  | 3.88E-14 | 1.40E-02 | -6.77  | -9.89 | -11.98 | -0.89 | 0.25  | 0.0% | 0.0%    | 8.4E-59 |         |
| 920 | 79-141     | glycolic acid                                                                                                  | 76   | 23    | 2.8E-02  | 3.9E-05  | 8.5E-02  | 1.8     | 3.5E-06 | 3.5E-06 | 3.5E-06 | conf | conf | 2.8E-02  | 3.88E-14 | 1.40E-02 | -6.77  | -9.53 | -10.36 | -0.95 | 0.43  | 0.0% | 0.0%    | 1.9E-41 |         |
| 921 | 33319-83-6 | 2,4,5,6,7,8,10,11,12,13,14-dodecahydro-2H-cycloocta[b]pyran                                                    | 237  | 187   | 1.0E-02  | 7.00E-01 | 6.0E-01  | 3.5E-06 | 3.5E-06 | 3.5E-06 | 3.5E-06 | conf | conf | 2.2E-02  | 2.7E-06  | 1.10E-02 | -6.81  | -6.61 | -10.74 | -8.00 | 0.76  | 0.0% | 0.0%    | 2.0E-23 |         |
| 922 | 520-26-3   | hesperidin                                                                                                     | 611  | 350   | 1.6E-14  | 2.1E-01  | 1.9E-01  | 9.3     | 3.5E-06 | 3.5E-06 | 3.5E-06 | conf | conf | 2.7E-02  | 3.7E-14  | 1.40E-02 | -6.45  | -7.61 | -9.74  | -2.20 | 1.88  | 0.0% | 0.0%    | 1.2E-42 |         |
| 923 | 101-14-4   | 4-methylbenzyl-2-chloroamine                                                                                   | 267  | 157   | 5.2E-04  | 7.7E-03  | 3.0E-03  | 3.3     | 3.5E-06 | 3.5E-07 | 3.5E-06 | conf | conf | 2.4E-02  | 3.38E-12 | 1.2E-02  | -6.67  | -7.27 | -9.19  | -2.80 | 0.26  | 0.0% | 0.0%    | 3.5E-20 |         |
| 924 | 67-52-7    | barbituric acid                                                                                                | 128  | 199   | 1.5E-08  | 1.4E-04  | 5.6E-02  | 4.0     | 3.5E-06 | 3.5E-06 | 3.5E-06 | conf | conf | 2.4E-02  | 3.38E-12 | 1.2E-02  | -6.67  | -7.27 | -9.19  | -2.80 | 0.26  | 0.0% | 0.0%    | 3.5E-20 |         |
| 925 | 96-31-1    | 1,3-dimethylurea                                                                                               | 88   | 20    | 2.0E-01  | 1.7E-05  | 2.4E-01  | 0       | 3.5E-06 | 7.2E-09 | 3.5E-06 | conf | conf | 1.6E-02  | 2.3E-06  | 7.9E-01  | -6.10  | -6.88 | -7.89  | -0.61 | 0.66  | 0.0% | 0.0%    | 3.2E-34 |         |
| 926 | 122-60-1   | 2,3-epoxypropyl phenyl ether                                                                                   | 130  | 13    | 4.7E-03  | 1.1E-03  | 4.1E-01  | 1.40    | 3.5E-06 | 1.6E-07 | 3.5E-06 | conf | conf | 2.1E-02  | 3.0E-11  | 1.10E-02 | -6.05  | -7.80 | -9.13  | -1.42 | 0.13  | 0.0% | 0.0%    | 1.7E-28 |         |
| 927 | 108-18-9   | disopropylamine                                                                                                | 101  | -78   | 1.8E-01  | 6.0E-04  | 4.4E-01  | 1.40    | 3.5E-06 | 3.5E-07 | 3.5E-06 | conf | conf | 1.9E-02  | 2.7E-06  | 9.60E-02 | -9.37  | -8.80 | -10.67 | -1.89 | 0.23  | 0.0% | 0.0%    | 1.7E-28 |         |
| 928 | 110-44-1   | hexa-2,6-dienic acid                                                                                           | 112  | 25    | 1.3E-02  | 2.2E-03  | 4.2E-01  | 1.40    | 3.5E-06 | 3.5E-06 | 3.5E-06 | conf | conf | 2.8E-02  | 3.88E-14 | 1.40E-02 | -6.99  | -8.82 | -10.39 | -1.08 | 0.36  | 0.0% | 0.0%    | 1.1E-40 |         |
| 929 | 84-74-2    | diethyl phthalate                                                                                              | 278  | 4     | 1.0E-02  | 2.5E-03  | 6.0E-01  | 1.40    | 3.5E-06 | 3.5E-06 | 3.5E-06 | conf | conf | 2.8E-02  | 3.88E-14 | 1.40E-02 | -6.64  | -7.80 | -9.17  | -1.42 | 0.20  | 0.0% | 0.0%    | 2.5E-32 |         |
| 930 | 100-64-5   | but-2-ene-2,4-diol                                                                                             | 88   | -9    | 7.3E-01  | 2.5E-05  | 3.7E-01  | 1.40    | 3.5E-06 | 3.5E-06 | 3.5E-06 | conf | conf | 2.8E-02  | 3.88E-14 | 1.40E-02 | -6.68  | -8.61 | -9.37  | -1.70 | 0.43  | 0.0% | 0.0%    | 9.8E-44 |         |
| 931 | 7785-26-4  | 1-(n-31)-ene                                                                                                   | 136  | -14   | 5.4E-02  | 2.8E-01  | 1.9E-04  | 1.40    | 3.5E-06 | 9.7E-10 | 3.5E-06 | conf | conf | 1.6E-02  | 2.2E-06  | 7.8E-01  | -10.09 | -9.77 | -12.13 | -2.61 | 0.97  | 0.0% | 0.0%    | 1.8E-42 |         |
| 932 | 627-93-0   | dimethyl acetate                                                                                               | 174  | 138   | 1.7E-01  | 1.8E-01  | 2.5E-01  | 1.40    | 3.5E-06 | 3.5E-06 | 3.5E-06 | conf | conf | 2.7E-02  | 3.88E-14 | 1.40E-02 | -6.64  | -7.89 | -9.40  | -1.19 | 0.83  | 0.0% | 0.0%    | 1.8E-32 |         |
| 933 | 118-69-4   | 2,6-dichlorotoluene                                                                                            | 161  | 4     | 4.8E-01  | 6.1E-03  | 8.8E-03  | 1.40    | 3.5E-06 | 3.5E-07 | 3.5E-06 | conf | conf | 1.7E-02  | 2.4E-05  | 8.5E-01  | -9.43  | -9.14 | -10.92 | -2.20 | 0.36  | 0.0% | 0.0%    | 6.1E-36 |         |
| 934 | 34763-48-4 | 608-748-1                                                                                                      | 452  | 306   | 1.7E-14  | 9.7E-01  | 4.1E-06  | 1.40    | 3.5E-06 | 3.5E-06 | 3.5E-06 | conf | conf | 1.8E-02  | 2.35E-02 | 9.0E-01  | -9.22  | -9.08 | -9.97  | -1.30 | 1.02  | 0.0% | 0.0%    | 8.8E-22 |         |
| 935 | 104-74-6   | 2-ethylhexan-1-ol                                                                                              | 129  | -21   | 2.7E-02  | 3.6E-02  | 2.4E-02  | 1.40    | 3.5E-06 | 3.5E-06 | 3.5E-06 | conf | conf | 1.9E-02  | 2.7E-06  | 9.60E-02 | -9.37  | -8.80 | -10.67 | -1.89 | 0.23  | 0.0% | 0.0%    | 8.0E-37 |         |
| 936 | 1975-78-6  | decane-1,8-diol                                                                                                | 113  | 5     | 5.8E-01  | 1.1E-01  | 6.0E-03  | 1.40    | 3.5E-06 | 3.5E-07 | 3.5E-06 | conf | conf | 2.2E-02  | 3.0E-11  | 1.10E-02 | -6.01  | -8.76 | -9.93  | -2.79 | 0.72  | 0.0% | 0.0%    | 9.9E-25 |         |
| 937 | 5590-70-4  | titanium tetrabutoxide                                                                                         | 188  | 7     | 9.9E-03  | 2.78E-03 | 3.0E-02  | 1.40    | 3.5E-06 | 3.5E-06 | 3.5E-06 | conf | conf | 2.2E-02  | 3.0E-11  | 1.10E-02 | -6.64  | -7.80 | -9.17  | -1.42 | 0.20  | 0.0% | 0.0%    |         |         |

|      |             |                                                                                                             |     |     |         |          |          |      |         |         |         |      |      |         |         |          |        |        |        |       |       |      |         |         |         |
|------|-------------|-------------------------------------------------------------------------------------------------------------|-----|-----|---------|----------|----------|------|---------|---------|---------|------|------|---------|---------|----------|--------|--------|--------|-------|-------|------|---------|---------|---------|
| 1074 | 95-238      | 5-amino-1,3-dihydro-2H-benzimidazol-2-one                                                                   | 149 | 130 | 1.66-03 | 9.94E-03 | 1.9E-04  | 6.0  | 3.5E-06 | 3.5E-07 | 3.5E-07 | conf | conf | 1.7E-02 | 2.4E-06 | 8.88E-01 | -6.58  | -7.53  | -3.98  | -1.83 | 0.84  | 0.0% | 0.0%    | 2.1E-27 |         |
| 1075 | 112-42-3    | urea                                                                                                        | 171 | 171 | 1.8E-03 | 2.0E-07  | 1.2E-04  | 1.0  | 3.5E-06 | 3.5E-07 | 3.5E-07 | conf | conf | 1.7E-02 | 2.4E-06 | 8.88E-01 | -6.58  | -7.53  | -3.98  | -1.83 | 0.84  | 0.0% | 0.0%    | 1.5E-30 |         |
| 1076 | 81-25-4     | thiolic acid                                                                                                | 409 | 293 | 1.3E-12 | 1.1E-02  | 3.34E-03 | 4.9  | 3.5E-06 | 3.5E-07 | 3.5E-07 | conf | conf | 1.7E-02 | 2.4E-06 | 8.88E-01 | -6.58  | -7.53  | -3.98  | -1.83 | 0.84  | 0.0% | 0.0%    | 7.1E-36 |         |
| 1077 | 98-53-3     | anti-butylcyclohexanone                                                                                     | 154 | 8   | 2.3E-04 | 3.4E-02  | 8.31E-02 | 140  | 3.5E-06 | 3.5E-07 | 3.5E-07 | conf | conf | 1.8E-02 | 2.6E-06 | 9.44E-01 | -9.54  | -9.31  | -10.47 | -1.78 | 0.44  | 0.0% | 0.0%    | 1.1E-35 |         |
| 1078 | 90-00-2     | D-glucosyl-1,5-lactone                                                                                      | 178 | 137 | 3.1E-07 | 1.5E-05  | 1.1E-02  | 1.4  | 3.5E-06 | 3.5E-07 | 3.5E-07 | conf | conf | 1.8E-02 | 2.6E-06 | 9.44E-01 | -9.54  | -9.31  | -10.47 | -1.78 | 0.44  | 0.0% | 0.0%    | 8.8E-48 |         |
| 1079 | 6041-94-7   | 4-[2,5-dichlorophenyl]-3-hydroxy-N-phenyl-naphthalene-2-carboxamide                                         | 438 | 276 | 1.3E-04 | 1.1E-02  | 3.8E-03  | 9.3  | 3.5E-06 | 3.5E-07 | 3.5E-07 | conf | conf | 1.1E-02 | 1.6E-06 | 5.67E-01 | -3.99  | -8.49  | -8.75  | -0.93 | 1.38  | 0.0% | 0.0%    | 3.2E-29 |         |
| 1080 | 897-31-340  | Methyl 5-methyl-4-[(5-methylthio)pentyl]sulfanylmethylsulfonate-3-carboxylate                               | 261 | 152 | 1.7E-04 | 8.7E-02  | 1.0E-02  | 140  | 3.5E-06 | 3.5E-07 | 3.5E-07 | conf | conf | 1.9E-02 | 2.6E-06 | 9.77E-01 | -7.27  | -8.23  | -10.04 | -1.75 | 1.21  | 0.0% | 0.0%    | 1.1E-32 |         |
| 1081 | 500311-86-9 | 8-bromo-5-(1-chloropropyl)-2-[(1-pyrazol-5-yl)-3-pyrazole-5-carboxylic acid]                                | 393 | 171 | 1.8E-05 | 9.4E-02  | 1.1E-02  | 0.5  | 3.5E-06 | 3.5E-07 | 3.5E-07 | conf | conf | 1.9E-02 | 2.6E-06 | 9.77E-01 | -7.27  | -8.23  | -10.04 | -1.75 | 1.21  | 0.0% | 0.0%    | 1.3E-27 |         |
| 1082 | 5692-04-0   | 8-bromo-5-carboxylol                                                                                        | 207 | 56  | 4.0E-01 | 1.38E-01 | 1.14E-03 | 140  | 3.5E-06 | 3.5E-07 | 3.5E-07 | conf | conf | 1.8E-02 | 2.6E-06 | 9.44E-01 | -9.54  | -9.32  | -10.06 | -2.56 | 0.36  | 0.0% | 0.0%    | 4.3E-27 |         |
| 1083 | 7021-61-2   | calcium 4-[3-chloro-4-methyl-2-sulphonatophenyl]azo-3-hydroxy-2-naphthoate                                  | 459 | 87  | 1.8E-05 | 9.4E-02  | 1.1E-02  | 0.5  | 3.5E-06 | 3.5E-07 | 3.5E-07 | conf | conf | 1.9E-02 | 2.6E-06 | 9.77E-01 | -7.27  | -8.23  | -10.04 | -1.75 | 1.21  | 0.0% | 0.0%    | 1.2E-29 |         |
| 1084 | 5188-07-8   | 3-methyl methanethiolate                                                                                    | 70  | 87  | 9.9E-03 | 4.0E-02  | 3.0E-02  | 140  | 3.5E-06 | 3.5E-07 | 3.5E-07 | conf | conf | 1.5E-02 | 2.0E-06 | 7.41E-01 | -8.84  | -8.82  | -11.07 | -8.81 | -2.29 | 0.39 | 0.0%    | 0.0%    | 3.4E-20 |
| 1085 | 623-03-0    | 4-chlorobenzonitrile                                                                                        | 138 | 23  | 2.9E-06 | 2.5E-03  | 1.5E-02  | 140  | 3.5E-06 | 3.5E-07 | 3.5E-07 | conf | conf | 1.2E-02 | 1.6E-06 | 5.66E-01 | -7.56  | -7.28  | -8.32  | -1.32 | 0.34  | 0.0% | 0.0%    | 8.4E-24 |         |
| 1086 | 80286-58-4  | 2-[1(R,4(R),6(R),4-2-dimethyl-1,2,3,4,4,5,6,8a-octahydrophenanthro-1-yl)acetyl acid]                        | 124 | 4   | 1.2E-04 | 4.0E-01  | 3.4E-01  | 140  | 3.5E-06 | 3.5E-07 | 3.5E-07 | conf | conf | 1.9E-02 | 2.6E-06 | 9.77E-01 | -7.27  | -8.23  | -10.04 | -1.75 | 1.21  | 0.0% | 0.0%    | 1.3E-27 |         |
| 1087 | 6007-00-0   | ethyl 3-bromo-2-methylpropanoate                                                                            | 155 | -11 | 2.9E-02 | 1.5E-01  | 2.1E-02  | 140  | 3.5E-06 | 3.5E-07 | 3.5E-07 | conf | conf | 1.9E-02 | 2.6E-06 | 9.77E-01 | -7.27  | -8.23  | -10.04 | -1.75 | 1.21  | 0.0% | 0.0%    | 4.7E-44 |         |
| 1088 | 110-25-2    | [2-(N-methyl-N-1-oxo-9-pyridinyl)acetyl]glycine                                                             | 354 | 196 | 2.3E-07 | 6.0E-02  | 6.0E-02  | 5.3  | 3.5E-06 | 3.5E-07 | 3.5E-07 | conf | conf | 1.9E-02 | 2.6E-06 | 9.77E-01 | -7.27  | -8.23  | -10.04 | -1.75 | 1.21  | 0.0% | 0.0%    | 6.3E-27 |         |
| 1089 | 72714-63-9  | 1,3,5-tri-phenyl-4                                                                                          | 100 | 43  | 1.7E-05 | 1.6E-02  | 2.1E-05  | 140  | 3.5E-06 | 3.5E-07 | 3.5E-07 | conf | conf | 1.9E-02 | 2.6E-06 | 9.77E-01 | -7.27  | -8.23  | -10.04 | -1.75 | 1.21  | 0.0% | 0.0%    | 1.3E-29 |         |
| 1090 | 595-37-9    | 2,2-dimethylbutyric acid                                                                                    | 116 | 22  | 9.6E-01 | 1.3E-01  | 8.7E-01  | 140  | 3.5E-06 | 3.5E-07 | 3.5E-07 | conf | conf | 1.1E-02 | 1.6E-06 | 5.67E-01 | -3.99  | -7.91  | -7.63  | -8.71 | -1.03 | 0.37 | 0.0%    | 0.0%    | 2.5E-28 |
| 1091 | 76114-73-3  | Carbamic acid, N-butyl-, 2-propenyl-1-yl ester                                                              | 201 | 10  | 7.6E-04 | 4.4E-01  | 1.1E-02  | 140  | 3.5E-06 | 3.5E-07 | 3.5E-07 | conf | conf | 1.9E-02 | 2.6E-06 | 9.77E-01 | -7.27  | -8.23  | -10.04 | -1.75 | 1.21  | 0.0% | 0.0%    | 1.4E-44 |         |
| 1092 | 456-04-2    | o-chloro-4-fluorocyclohexanone                                                                              | 173 | 25  | 6.8E-06 | 1.6E-01  | 1.3E-02  | 140  | 3.5E-06 | 3.5E-07 | 3.5E-07 | conf | conf | 1.8E-02 | 2.6E-06 | 9.44E-01 | -9.89  | -8.67  | -10.11 | -3.75 | 0.47  | 0.0% | 0.0%    | 5.1E-20 |         |
| 1093 | 274693-15-7 | decyl oleate                                                                                                | 423 | 161 | 1.7E-06 | 2.3E-07  | 2.6E-12  | 140  | 3.5E-06 | 3.5E-07 | 3.5E-07 | conf | conf | 1.1E-02 | 1.5E-06 | 5.4E-01  | -6.64  | -9.64  | -6.52  | 1.44  | 0.0%  | 0.0% | 3.4E-29 |         |         |
| 1094 | 274693-15-7 | Benzyl 4-(2,4,6,8-tetrakis(6-ethyl-2,2-dimethyl-2-hydroxyethyl)-3-azido)cyclopentyl-3-[3-oxo-4-yl]carbamate | 307 | 155 | 6.1E-07 | 1.1E-03  | 1.5E-02  | 140  | 3.5E-06 | 3.5E-07 | 3.5E-07 | conf | conf | 1.8E-02 | 2.6E-06 | 9.44E-01 | -7.36  | -8.38  | -10.22 | 1.74  | 0.70  | 0.0% | 0.0%    | 1.5E-32 |         |
| 1095 | 59-67-6     | nitric acid                                                                                                 | 123 | 63  | 1.2E-02 | 4.1E-04  | 4.9E-02  | 2.0  | 3.5E-06 | 3.5E-07 | 3.5E-07 | conf | conf | 1.8E-02 | 2.5E-06 | 9.13E-01 | -6.78  | -7.80  | -9.71  | -0.71 | 0.61  | 0.0% | 0.0%    | 4.1E-38 |         |
| 1096 | 74860-00-7  | 3-[1,2-dibenzoyl-4-azabenz-5-ylmethyl]-3H-isoxazole-1,2(1H)-dione                                           | 152 | 254 | 6.4E-11 | 2.0E-01  | 1.9E-05  | 140  | 3.5E-06 | 3.5E-07 | 3.5E-07 | conf | conf | 1.8E-02 | 2.5E-06 | 9.13E-01 | -6.78  | -7.80  | -9.71  | -0.71 | 0.61  | 0.0% | 0.0%    | 2.5E-23 |         |
| 1097 | 366-64-5    | o-trifluoromethylbenzamide                                                                                  | 189 | 90  | 8.0E-02 | 4.2E-02  | 9.3E-01  | 1.27 | 3.5E-06 | 3.5E-07 | 3.5E-07 | conf | conf | 1.8E-02 | 2.5E-06 | 9.13E-01 | -6.78  | -7.80  | -9.71  | -0.71 | 0.61  | 0.0% | 0.0%    | 1.5E-30 |         |
| 1098 | 130723-99-4 | Ethyl N-(2-[(chloromethyl)-1-methyl-3H-benzimidazol-5-yl]carbamoyl)N-pyridin-2-yl-2-amine                   | 401 | 254 | 5.8E-11 | 1.5E-05  | 5.5E-03  | 140  | 3.5E-06 | 3.5E-07 | 3.5E-07 | conf | conf | 1.8E-02 | 2.5E-06 | 9.13E-01 | -6.71  | -8.45  | -10.02 | -2.86 | 0.64  | 0.0% | 0.0%    | 7.5E-25 |         |
| 1099 | 13290-96-5  | dimethyl 5-nitrososulfonate                                                                                 | 239 | 77  | 2.0E-02 | 1.6E-02  | 3.0E-01  | 140  | 3.5E-06 | 3.5E-07 | 3.5E-07 | conf | conf | 1.8E-02 | 2.5E-06 | 9.13E-01 | -6.88  | -8.39  | -10.03 | -1.93 | 0.64  | 0.0% | 0.0%    | 1.9E-31 |         |
| 1100 | 21535-43-3  | N-(2-benzoylmethyl)-2-chloroacetamide                                                                       | 260 | 170 | 5.5E-06 | 3.6E-01  | 1.4E-02  | 1.27 | 3.5E-06 | 3.5E-07 | 3.5E-07 | conf | conf | 1.8E-02 | 2.5E-06 | 9.13E-01 | -6.74  | -8.41  | -10.07 | -3.08 | 0.08  | 0.0% | 0.0%    | 8.3E-24 |         |
| 1101 | 96-99-1     | 4-chloro-3-bromobenzoic acid                                                                                | 202 | 126 | 5.8E-04 | 5.0E-02  | 2.2E-02  | 140  | 3.5E-06 | 3.5E-07 | 3.5E-07 | conf | conf | 1.8E-02 | 2.5E-06 | 9.13E-01 | -7.10  | -7.92  | -9.99  | -1.27 | 0.35  | 0.0% | 0.0%    | 4.2E-32 |         |
| 1102 | 87-40-5     | 3-chloro-o-toluidine                                                                                        | 142 | 42  | 4.7E-06 | 5.1E-02  | 1.9E-02  | 3.5  | 3.5E-06 | 3.5E-07 | 3.5E-07 | conf | conf | 1.8E-02 | 2.5E-06 | 9.13E-01 | -7.16  | -8.34  | -10.11 | -4.21 | 0.71  | 0.0% | 0.0%    | 2.0E-28 |         |
| 1103 | 102-77-2    | 1-methyl-2-methyl-4-phenylacetate                                                                           | 252 | 151 | 6.8E-04 | 9.6E-01  | 1.0E-01  | 140  | 3.5E-06 | 3.5E-07 | 3.5E-07 | conf | conf | 1.8E-02 | 2.5E-06 | 9.13E-01 | -6.78  | -7.10  | -8.74  | -2.63 | 0.56  | 0.0% | 0.0%    | 1.2E-18 |         |
| 1104 | 36768-04-4  | 2,2,6,6-tetraethyl-4-phenylacetate                                                                          | 156 | 52  | 6.1E-05 | 3.8E-01  | 8.7E-01  | 140  | 3.5E-06 | 3.5E-07 | 3.5E-07 | conf | conf | 1.8E-02 | 2.5E-06 | 9.13E-01 | -6.71  | -7.31  | -8.86  | -0.84 | 0.33  | 0.0% | 0.0%    | 1.2E-30 |         |
| 1105 | 123335-44-5 | 1(1,3-dimethyl-1H-2H-1-thienyl)propan-1-ol                                                                  | 185 | 70  | 1.7E-02 | 2.4E-04  | 1.0E-01  | 140  | 3.5E-06 | 3.5E-07 | 3.5E-07 | conf | conf | 1.8E-02 | 2.5E-06 | 9.13E-01 | -6.91  | -7.88  | -9.98  | -1.79 | 0.78  | 0.0% | 0.0%    | 7.0E-32 |         |
| 1106 | 2436-29-5   | 3,3-dimethyl-1,3-dihydro-2H-pyran-2-yl vinylpropanoate                                                      | 203 | 177 | 7.3E-06 | 2.1E-03  | 1.0E-01  | 140  | 3.5E-06 | 3.5E-07 | 3.5E-07 | conf | conf | 1.8E-02 | 2.5E-06 | 9.13E-01 | -6.97  | -8.03  | -10.00 | -1.61 | 1.19  | 0.0% | 0.0%    | 2.2E-33 |         |
| 1107 | 2009-06-1   | 2-oxopropenethanol                                                                                          | 148 | -44 | 1.0E-02 | 2.4E-05  | 2.5E-05  | 140  | 3.5E-06 | 3.5E-07 | 3.5E-07 | conf | conf | 1.9E-02 | 2.6E-06 | 9.77E-01 | -7.10  | -8.18  | -10.11 | -1.53 | 1.31  | 0.0% | 0.0%    | 1.5E-35 |         |
| 1108 | 98-04-2     | vinyl 2-ethylacetate                                                                                        | 170 | -22 | 5.5E-05 | 1.2E-02  | 4.0E-03  | 140  | 3.5E-06 | 3.5E-07 | 3.5E-07 | conf | conf | 1.7E-02 | 2.4E-06 | 8.88E-01 | -7.10  | -7.98  | -9.13  | -3.90 | 0.44  | 0.0% | 0.0%    | 7.8E-34 |         |
| 1109 | 2146-71-6   | vinyl butyrate                                                                                              | 226 | 24  | 7.1E-01 | 3.8E-02  | 4.4E-05  | 140  | 3.5E-06 | 3.5E-07 | 3.5E-07 | conf | conf | 1.4E-02 | 1.9E-06 | 6.68E-01 | -9.20  | -8.95  | -10.47 | -1.27 | 1.51  | 0.0% | 0.0%    | 9.5E-40 |         |
| 1110 | 85490-83-9  | [ethylenbis(2-ethylthiomethyl)]tetraethylphosphonic acid, calcium sodium salt                               | 218 | 54  | 4.5E-06 | 3.9E-02  | 7.3E-02  | 140  | 3.5E-06 | 3.5E-07 | 3.5E-07 | conf | conf | 1.9E-02 | 2.6E-06 | 9.77E-01 | -7.10  | -8.18  | -10.11 | -1.63 | 0.42  | 0.0% | 0.0%    | 2.3E-38 |         |
| 1111 | 1647-12-7   | Ethyl 2-methylbut-3-enolate                                                                                 | 128 | -57 | 1.2E-03 | 4.5E-03  | 1.3E-02  | 140  | 3.5E-06 | 3.5E-07 | 3.5E-07 | conf | conf | 1.8E-02 | 2.5E-06 | 9.13E-01 | -6.80  | -9.87  | -11.27 | -2.09 | 0.65  | 0.0% | 0.0%    | 1.3E-39 |         |
| 1112 | 109-77-3    | malonic acid                                                                                                | 121 | 69  | 1.8E-02 | 2.5E-05  | 1.1E-02  | 140  | 3.5E-06 | 3.5E-07 | 3.5E-07 | conf | conf | 1.9E-02 | 2.6E-06 | 9.77E-01 | -7.10  | -8.18  | -10.11 | -1.63 | 0.42  | 0.0% | 0.0%    | 1.4E-44 |         |
| 1113 | 116-02-9    | 3,3,5-trimethylcyclohexanol                                                                                 | 142 | 3   | 6.1E-06 | 3.9E-02  | 8.5E-02  | 140  | 3.5E-06 | 3.5E-07 | 3.5E-07 | conf | conf | 1.8E-02 | 2.5E-06 | 9.13E-01 | -6.84  | -8.73  | -10.11 | -1.24 | 0.29  | 0.0% | 0.0%    | 4.5E-37 |         |
| 1114 | 101-43-9    | cyclohexyl methacrylate                                                                                     | 168 | -13 | 2.9E-01 | 7.1E-03  | 3.5E-03  | 140  | 3.5E-06 | 3.5E-07 | 3.5E-07 | conf | conf | 1.8E-02 | 2.5E-06 | 9.13E-01 | -6.85  | -9.66  | -10.03 | -2.20 | 0.87  | 0.0% | 0.0%    | 2.6E-43 |         |
| 1115 | 15588-01-1  | disodium phthalate                                                                                          | 140 | 87  | 1.5E-06 | 3.5E-03  | 1.5E-02  | 140  | 3.5E-06 | 3.5E-07 | 3.5E-07 | conf | conf | 1.9E-02 | 2.6E-06 | 9.77E-01 | -7.10  | -8.18  | -10.11 | -1.63 | 0.42  | 0.0% | 0.0%    | 1.3E-30 |         |
| 1116 | 1843-05-6   | octabenzene                                                                                                 | 326 | 177 | 9.3E-06 | 3.2E-01  | 9.11E-06 | 9.7  | 3.5E-06 | 3.5E-07 | 3.5E-07 | conf | conf | 1.2E-02 | 1.7E-06 | 6.00E-01 | -8.79  | -9.31  | -10.08 | -3.95 | 0.51  | 0.0% | 0.0%    | 9.5E-19 |         |
| 1117 | 106-20-7    | bis(2-ethylhexyl)amine                                                                                      | 241 | 28  | 7.1E-01 | 1.7E-03  | 3.4E-06  | 10.9 | 3.5E-06 | 3.5E-07 | 3.5E-07 | conf | conf | 1.1E-02 | 1.5E-06 | 5.38E-01 | -10.38 | -10.14 | -12.81 | -1.71 | 0.51  | 0.0% | 0.0%    | 1.7E-47 |         |
| 1118 | 938063-69-9 | Methyl 3-[2-(2-methylbutan-1-ylthio)propanoate]                                                             | 154 | 54  | 4.5E-06 | 3.9E-02  | 7.3E-02  | 140  | 3.5E-06 | 3.5E-07 | 3.5E-07 | conf | conf | 1.9E-02 | 2.6E-06 | 9.77E-01 | -7.10  | -8.18  | -10.11 | -1.63 | 0.42  | 0.0% | 0.0%    | 2.3E-38 |         |
| 1119 | 123-92-2    | isopentyl acetate                                                                                           | 130 | -56 | 7.6E-02 | 3.3E-03  | 1.6E-02  | 140  | 3.5E-06 | 3.5E-07 | 3.5E-07 | conf | conf | 1.4E-02 | 2.2E-06 | 8.00E-01 | -9.56  | -9.30  | -10.73 | -1.00 | 0.38  | 0.0% | 0.0%    | 3.1E-44 |         |
| 1120 | 110-89-4    | glycidol                                                                                                    | 85  |     |         |          |          |      |         |         |         |      |      |         |         |          |        |        |        |       |       |      |         |         |         |

|      |             |                                                                                             |     |     |         |         |         |      |      |         |         |      |      |         |         |         |        |        |        |       |      |      |         |         |
|------|-------------|---------------------------------------------------------------------------------------------|-----|-----|---------|---------|---------|------|------|---------|---------|------|------|---------|---------|---------|--------|--------|--------|-------|------|------|---------|---------|
| 1257 | 10605-40    | chloro-3-chloropropylidimethylsilane                                                        | 171 | 44  | 6.4E-02 | 1.7E-02 | 5.2E-03 | 1.40 | 3.5E | 1.1E-07 | 3.5E-08 | conf | conf | 9.0E-01 | 1.3E-04 | 4.4E-01 | -10.05 | 9.70   | -11.87 | -1.91 | 0.16 | 0.0% | 0.0%    | 3.5E-46 |
| 1258 | 7651-02-7   | N-[3-dimethylamino]propylperamide                                                           | 171 | 44  | 1.6E-02 | 1.7E-02 | 5.2E-03 | 1.40 | 3.5E | 1.1E-07 | 3.5E-08 | conf | conf | 9.0E-01 | 1.3E-04 | 4.4E-01 | -10.05 | 9.70   | -11.87 | -1.91 | 0.16 | 0.0% | 0.0%    | 8.6E-21 |
| 1259 | 599-85-1    | dichloromethane                                                                             | 305 | 87  | 9.9E-03 | 1.2E-03 | 3.0E-02 | 1.40 | 3.5E | 1.1E-07 | 6.6E-09 | conf | conf | 1.1E-02 | 1.6E-06 | 5.6E-06 | -6.88  | -7.29  | -8.98  | 0.81  | 0.0% | 0.0% | 3.4E-34 |         |
| 1260 | 26722-90-2  | hexadecyl chloride                                                                          | 305 | 84  | 7.1E-03 | 5.7E-04 | 3.2E-02 | 1.40 | 3.5E | 1.1E-06 | 3.5E-07 | conf | conf | 9.0E-01 | 1.3E-04 | 4.4E-01 | -10.10 | -10.05 | -12.14 | -2.63 | 1.13 | 0.0% | 0.0%    | 2.0E-42 |
| 1261 | 7339-94-6   | dimethylsiloxane                                                                            | 344 | 96  | 2.2E-02 | 3.0E-02 | 1.1E-01 | 1.40 | 3.5E | 1.1E-07 | 1.1E-07 | conf | conf | 9.0E-01 | 1.3E-04 | 4.4E-01 | -10.02 | -9.88  | -11.02 | -1.86 | 0.0% | 0.0% | 7.2E-35 |         |
| 1262 | 95149-35-3  | 1,4-bis(trim-4-propylchlorophenyl)pentan-1-one                                              | 388 | 119 | 5.9E-04 | 7.4E-01 | 2.3E-02 | 1.40 | 3.5E | 1.1E-07 | 1.1E-07 | conf | conf | 9.0E-01 | 1.3E-04 | 4.4E-01 | -8.69  | -9.13  | -9.77  | -1.46 | 0.33 | 0.0% | 0.0%    | 5.9E-16 |
| 1263 | 644-97-3    | bis(2-chloroethyl)phosphine                                                                 | 179 | 5   | 1.3E-01 | 3.1E-02 | 1.0E-03 | 1.40 | 3.5E | 1.1E-07 | 1.1E-07 | conf | conf | 1.2E-02 | 1.7E-06 | 6.2E-01 | -9.21  | -8.97  | -10.21 | -1.63 | 0.21 | 0.0% | 0.0%    | 7.7E-35 |
| 1264 | 111-44-4    | bis(2-chloroethyl) ether                                                                    | 179 | 5   | 1.4E-02 | 4.2E-03 | 3.6E-03 | 1.40 | 3.5E | 1.1E-07 | 1.1E-07 | conf | conf | 9.0E-01 | 1.3E-04 | 4.4E-01 | -8.50  | -8.50  | -9.42  | -1.78 | 0.42 | 0.0% | 0.0%    | 2.8E-41 |
| 1265 | 34452-51-2  | potassium mercaptosulfate                                                                   | 247 | 8   | 9.9E-03 | 9.0E-02 | 3.0E-02 | 1.40 | 3.5E | 1.1E-07 | 6.6E-09 | conf | conf | 1.1E-02 | 1.6E-06 | 5.6E-06 | -6.89  | -6.99  | -7.29  | -8.93 | 0.89 | 0.0% | 0.0%    | 1.3E-30 |
| 1266 | 329-01-1    | o,n-o-fluoro-3-iodo-1,2-dichloroethane                                                      | 187 | 46  | 1.8E-02 | 3.5E-02 | 1.5E-02 | 1.40 | 3.5E | 1.1E-07 | 3.5E-08 | conf | conf | 9.0E-01 | 1.3E-04 | 4.4E-01 | -11.49 | -12.01 | -12.49 | -2.01 | 0.42 | 0.0% | 0.0%    | 4.3E-42 |
| 1267 | 135090-91-9 | 1,4-Dichlorophenyl 4,5-dihydro-5-methyl-1H-pyrazole-3,5-dicarboxylic acid 1,5-diethyl ester | 373 | 150 | 4.4E-04 | 2.4E-04 | 6.6E-04 | 1.40 | 3.5E | 1.1E-07 | 3.5E-07 | conf | conf | 9.8E-01 | 1.3E-04 | 4.8E-01 | -8.02  | -7.98  | -9.29  | -2.16 | 0.44 | 0.0% | 0.0%    | 1.1E-24 |
| 1268 | 927-07-1    | tert-butyl peroxylaldehyde                                                                  | 174 | -13 | 2.0E-02 | 2.2E-02 | 6.1E-02 | 1.40 | 3.5E | 1.1E-06 | 1.1E-06 | conf | conf | 1.2E-02 | 1.7E-06 | 6.2E-01 | -10.09 | -9.81  | -11.63 | -2.33 | 0.73 | 0.0% | 0.0%    | 1.4E-40 |
| 1269 | 402-31-3    | o,n-o-fluoro-3-iodo-1,2-dichloroethane                                                      | 187 | 46  | 2.1E-02 | 6.0E-01 | 1.1E-01 | 1.40 | 3.5E | 1.1E-07 | 1.1E-07 | conf | conf | 9.0E-01 | 1.3E-04 | 4.4E-01 | -10.03 | -11.21 | -11.66 | -1.66 | 0.47 | 0.0% | 0.0%    | 5.4E-47 |
| 1270 | 5421-46-5   | ammonium mercaptosulfate                                                                    | 194 | 87  | 9.9E-03 | 5.3E-02 | 3.0E-02 | 1.40 | 3.5E | 1.1E-07 | 6.6E-09 | conf | conf | 1.1E-02 | 1.5E-06 | 5.5E-06 | -7.00  | -7.29  | -8.94  | -0.93 | 0.89 | 0.0% | 0.0%    | 1.3E-30 |
| 1271 | 71242-40-8  | N-[3-bis(2-chloroethyl)amino]propan-1,3-diamine                                             | 272 | 105 | 3.7E-03 | 6.9E-01 | 7.9E-03 | 1.40 | 3.5E | 1.1E-06 | 1.1E-07 | conf | conf | 1.2E-02 | 1.7E-06 | 6.0E-01 | -8.09  | -8.45  | -9.82  | -1.73 | 0.51 | 0.0% | 0.0%    | 2.0E-24 |
| 1272 | 1558-34-4   | dichloro(bis(methylthio))methane                                                            | 174 | -13 | 1.2E-03 | 1.1E-03 | 1.1E-03 | 1.40 | 3.5E | 1.1E-07 | 1.1E-07 | conf | conf | 9.0E-01 | 1.3E-04 | 4.4E-01 | -8.81  | -8.81  | -11.57 | -1.89 | 0.64 | 0.0% | 0.0%    | 8.5E-48 |
| 1273 | 2629-68-7   | 1,4-bis(chlorodifluoromethyl)benzene                                                        | 247 | 3   | 1.2E-02 | 1.9E-01 | 3.5E-04 | 1.40 | 3.5E | 1.1E-07 | 1.1E-07 | conf | conf | 9.0E-01 | 1.3E-04 | 4.4E-01 | -10.30 | -10.01 | -12.30 | -2.76 | 0.64 | 0.0% | 0.0%    | 1.5E-42 |
| 1274 | 2082-81-7   | tetrachloroethene dimethacrylate                                                            | 162 | -16 | 3.5E-02 | 1.7E-02 | 1.5E-02 | 1.40 | 3.5E | 1.1E-06 | 3.5E-06 | conf | conf | 1.2E-02 | 1.7E-06 | 7.3E-01 | -9.37  | -9.37  | -10.71 | -4.0  | 0.51 | 0.0% | 0.0%    | 6.1E-40 |
| 1275 | 99-62-7     | 1,3-diisopropylbenzene                                                                      | 162 | -16 | 4.1E-01 | 1.2E-01 | 7.9E-04 | 1.40 | 3.5E | 1.1E-07 | 1.1E-07 | conf | conf | 8.9E-01 | 1.2E-06 | 4.3E-01 | -10.47 | -10.16 | -12.67 | -3.08 | 0.37 | 0.0% | 0.0%    | 4.8E-43 |
| 1276 | 89-04-3     | triethyl benzoate 2,3-tricarboxylate                                                        | 547 | 226 | 6.9E-10 | 2.0E-05 | 6.5E-11 | 1.40 | 3.5E | 1.1E-06 | 3.5E-07 | conf | conf | 8.4E-01 | 1.2E-06 | 4.1E-01 | -8.61  | -8.61  | -12.67 | -3.08 | 0.37 | 0.0% | 0.0%    | 1.8E-26 |
| 1277 | 4009-88-7   | (methoxymethyl)chlorophenylsodium chloride                                                  | 343 | 87  | 9.9E-03 | 2.4E-03 | 3.0E-02 | 1.40 | 3.5E | 1.1E-07 | 6.6E-09 | conf | conf | 1.1E-02 | 1.5E-06 | 5.5E-06 | -6.88  | -7.29  | -8.95  | -0.66 | 0.64 | 0.0% | 0.0%    | 1.5E-39 |
| 1278 | 110-83-8    | cyclohexene                                                                                 | 82  | -81 | 1.1E-04 | 2.6E-02 | 9.1E-01 | 1.40 | 3.5E | 1.1E-07 | 3.5E-08 | conf | conf | 8.6E-01 | 1.2E-06 | 4.2E-01 | -10.07 | -10.07 | -12.56 | -2.10 | 0.74 | 0.0% | 0.0%    | 8.1E-51 |
| 1279 | 2225-00-9   | 1-vinylheptyl-2H-zepin-2-one                                                                | 139 | 55  | 1.2E-03 | 1.0E-04 | 1.7E-01 | 0.4  | 3.5E | 1.1E-06 | 1.1E-06 | conf | conf | 1.4E-02 | 2.0E-06 | 7.2E-01 | -7.44  | -8.37  | -10.16 | -1.74 | 0.47 | 0.0% | 0.0%    | 1.6E-41 |
| 1280 | 106-63-6    | isobutyl acrylate                                                                           | 138 | 57  | 1.2E-03 | 4.0E-01 | 1.8E-02 | 1.40 | 3.5E | 1.1E-07 | 1.1E-06 | conf | conf | 1.2E-02 | 1.7E-06 | 6.1E-01 | -9.68  | -9.49  | -10.81 | -2.43 | 0.61 | 0.0% | 0.0%    | 2.7E-34 |
| 1281 | 49562-28-9  | fenofibrate                                                                                 | 361 | 158 | 8.3E-05 | 5.3E-02 | 1.5E-05 | 1.40 | 3.5E | 1.1E-06 | 1.1E-06 | conf | conf | 9.1E-01 | 1.3E-04 | 4.4E-01 | -8.29  | -8.24  | -9.44  | -1.58 | 1.04 | 0.0% | 0.0%    | 1.5E-29 |
| 1282 | 124-70-9    | dichloro(methylvinyl)silane                                                                 | 144 | -78 | 6.0E-03 | 7.0E-02 | 4.0E-02 | 1.40 | 3.5E | 1.1E-06 | 3.5E-06 | conf | conf | 1.0E-02 | 1.4E-06 | 5.1E-01 | -10.37 | -10.02 | -12.15 | -2.06 | 0.60 | 0.0% | 0.0%    | 6.6E-49 |
| 1283 | 422121-52-3 | 2,3,4,5-tetrachlorobenzoxychloride                                                          | 278 | 93  | 3.5E-02 | 1.9E-01 | 1.0E-04 | 1.40 | 3.5E | 1.1E-06 | 3.5E-06 | conf | conf | 9.1E-01 | 1.3E-04 | 4.4E-01 | -8.75  | -8.49  | -9.72  | -3.17 | 0.14 | 0.0% | 0.0%    | 4.1E-21 |
| 1284 | 119-53-9    | benzol                                                                                      | 212 | 107 | 7.7E-03 | 1.1E-03 | 6.9E-01 | 1.23 | 3.5E | 1.1E-06 | 3.5E-06 | conf | conf | 1.4E-02 | 1.9E-06 | 7.1E-01 | -7.34  | -8.33  | -10.17 | -1.08 | 0.22 | 0.0% | 0.0%    | 3.7E-34 |
| 1285 | 87-99-0     | wiret                                                                                       | 152 | 103 | 2.6E-01 | 1.0E-06 | 2.8E-03 | 1.40 | 3.5E | 1.1E-06 | 3.5E-06 | conf | conf | 1.5E-02 | 2.0E-06 | 7.5E-01 | -7.65  | -8.77  | -10.66 | -1.94 | 0.51 | 0.0% | 0.0%    | 9.9E-37 |
| 1286 | 111-83-0    | methyl laurate                                                                              | 214 | 21  | 1.1E-06 | 1.5E-06 | 1.9E-05 | 1.40 | 3.5E | 1.1E-07 | 3.5E-08 | conf | conf | 1.0E-02 | 1.4E-06 | 5.1E-01 | -10.30 | -11.67 | -12.33 | -1.51 | 0.23 | 0.0% | 0.0%    | 9.5E-42 |
| 1288 | 624-65-7    | 3-chlorophenyl                                                                              | 75  | -72 | 2.8E-04 | 1.1E-04 | 2.0E-01 | 1.40 | 3.5E | 1.1E-07 | 3.5E-08 | conf | conf | 9.1E-01 | 1.3E-04 | 4.4E-01 | -9.76  | -9.27  | -11.46 | -1.74 | 0.64 | 0.0% | 0.0%    | 4.3E-44 |
| 1289 | 5501-99-6   | di-sec-butylacryl, mixed isomers                                                            | 206 | 76  | 9.8E-01 | 5.4E-01 | 3.6E-04 | 1.13 | 3.5E | 1.1E-06 | 3.5E-07 | conf | conf | 1.2E-02 | 1.7E-06 | 6.0E-01 | -9.51  | -9.30  | -10.47 | -3.36 | 0.32 | 0.0% | 0.0%    | 1.4E-24 |
| 1290 | 4350-11-7   | cyclohexanecarboxylic acid                                                                  | 133 | 66  | 1.8E-04 | 2.2E-03 | 9.1E-01 | 1.6  | 3.5E | 1.1E-07 | 1.1E-07 | conf | conf | 1.4E-02 | 1.9E-06 | 7.1E-01 | -7.34  | -8.33  | -10.17 | -1.08 | 0.22 | 0.0% | 0.0%    | 3.7E-34 |
| 1291 | 92-84-6     | biphenyl-4,4'-diol                                                                          | 188 | 127 | 1.5E-06 | 2.2E-02 | 6.2E-02 | 8.9  | 3.5E | 1.1E-06 | 3.5E-08 | conf | conf | 9.8E-01 | 1.4E-06 | 4.9E-01 | -6.55  | -7.32  | -8.75  | -2.39 | 0.44 | 0.0% | 0.0%    | 5.0E-20 |
| 1292 | 88-99-3     | phthalic anhydride                                                                          | 186 | 127 | 1.0E-04 | 2.9E-03 | 1.2E-01 | 1.40 | 3.5E | 1.1E-06 | 1.1E-06 | conf | conf | 1.4E-02 | 1.9E-06 | 7.1E-01 | -7.41  | -8.36  | -10.16 | -1.74 | 0.47 | 0.0% | 0.0%    | 2.5E-44 |
| 1293 | 6643-21-5   | 6-amino-1,3-dimethylacryl                                                                   | 186 | 127 | 1.0E-04 | 5.5E-02 | 1.4E-01 | 1.40 | 3.5E | 1.1E-07 | 3.5E-07 | conf | conf | 9.0E-01 | 1.3E-04 | 4.4E-01 | -10.40 | -9.21  | -11.57 | -1.89 | 0.64 | 0.0% | 0.0%    | 8.5E-48 |
| 1294 | 434-83-4    | 2-chloro-6-fluorotoluene                                                                    | 145 | -22 | 4.4E-02 | 7.7E-01 | 2.5E-03 | 1.40 | 3.5E | 1.1E-07 | 1.1E-07 | conf | conf | 9.1E-01 | 1.3E-04 | 4.4E-01 | -10.21 | -9.88  | -12.09 | -2.14 | 0.11 | 0.0% | 0.0%    | 3.5E-46 |
| 1295 | 646-25-2    | decamethylenediamine                                                                        | 162 | -16 | 3.5E-02 | 1.7E-02 | 1.5E-02 | 1.40 | 3.5E | 1.1E-06 | 3.5E-06 | conf | conf | 1.2E-02 | 1.7E-06 | 6.2E-01 | -10.09 | -9.81  | -11.63 | -2.33 | 0.73 | 0.0% | 0.0%    | 1.4E-40 |
| 1296 | 51867-77-7  | 4(10,5-dichlorophenyl)azao-3-hydroxy-2-naphthoic acid                                       | 361 | 225 | 5.9E-02 | 3.7E-01 | 3.4E-07 | 1.40 | 3.5E | 1.1E-06 | 3.5E-06 | conf | conf | 9.0E-01 | 1.3E-04 | 4.4E-01 | -8.34  | -8.75  | -9.20  | -3.29 | 0.12 | 0.0% | 0.0%    | 1.5E-17 |
| 1297 | 130755-46-3 | 603-434                                                                                     | 704 | 340 | 6.6E-17 | 6.4E-06 | 6.8E-05 | 1.5  | 3.5E | 1.1E-06 | 3.5E-08 | conf | conf | 9.1E-01 | 1.3E-04 | 4.4E-01 | -10.20 | -10.20 | -12.10 | -3.61 | 1.06 | 0.0% | 0.0%    | 2.4E-21 |
| 1298 | 5884-60-0   | trichloro(hexadecyl)silane                                                                  | 360 | 90  | 3.9E-03 | 2.6E-01 | 2.3E-09 | 1.40 | 3.5E | 1.1E-07 | 3.5E-07 | conf | conf | 9.0E-01 | 1.3E-04 | 4.4E-01 | -10.30 | -10.02 | -12.40 | -2.40 | 0.64 | 0.0% | 0.0%    | 6.5E-21 |
| 1299 | 60728-03-0  | 612-012-9                                                                                   | 608 | 350 | 2.4E-22 | 6.0E-04 | 1.3E-05 | 1.40 | 3.5E | 1.1E-06 | 3.5E-08 | conf | conf | 9.0E-01 | 1.3E-04 | 4.4E-01 | -7.04  | -7.73  | -8.85  | -3.20 | 1.05 | 0.0% | 0.0%    | 3.2E-16 |
| 1300 | 2915-57-3   | bis(2-ethylhexyl) succinate                                                                 | 344 | -12 | 1.8E-02 | 2.9E-01 | 1.3E-01 | 1.40 | 3.5E | 1.1E-06 | 3.5E-06 | conf | conf | 9.1E-01 | 1.3E-04 | 4.4E-01 | -9.75  | -9.78  | -10.67 | -0.99 | 0.78 | 0.0% | 0.0%    | 9.4E-44 |
| 1301 | 2156-97-0   | isobutyl acrylate                                                                           | 138 | 57  | 1.2E-03 | 4.0E-01 | 1.8E-02 | 1.40 | 3.5E | 1.1E-07 | 1.1E-06 | conf | conf | 1.2E-02 | 1.7E-06 | 6.1E-01 | -9.68  | -9.49  | -10.81 | -2.43 | 0.61 | 0.0% | 0.0%    | 2.7E-34 |
| 1302 | 1322-18-4   | tert-butyl 3,5,5-trimethylpropylcarbamate                                                   | 230 | 21  | 7.0E-06 | 2.4E-06 | 4.9E-04 | 1.40 | 3.5E | 1.1E-06 | 1.1E-06 | conf | conf | 1.1E-02 | 1.5E-06 | 5.4E-01 | -10.64 | -10.36 | -12.48 | -2.94 | 0.80 | 0.0% | 0.0%    | 1.5E-42 |
| 1303 | 79-75-3     | nitrobenzene                                                                                | 61  | 79  | 7.9E-04 | 1.1E-01 | 7.9E-04 | 1.40 | 3.5E | 1.1E-07 | 3.5E-08 | conf | conf | 9.0E-01 | 1.3E-04 | 4.4E-01 | -10.02 | -9.88  | -11.02 | -1.86 | 0.47 | 0.0% | 0.0%    | 7.2E-35 |
| 1304 | 32768-54-3  | 2,3-dichlorotoluene                                                                         | 161 | 4   | 3.8E-01 | 1.6E-01 | 6.8E-03 | 1.40 | 3.5E | 1.1E-07 | 3.5E-08 | conf | conf | 9.1E-01 | 1.3E-04 | 4.4E-01 | -6.33  | -9.34  | -11.05 | -2.57 | 0.36 | 0.0% | 0.0%    | 4.4E-34 |
| 1305 | 396-78-0    | methylvinylchloride                                                                         | 67  | -69 | 7.3E-03 | 9.3E-04 | 5.8E-01 | 1.40 | 3.5E | 1.1E-07 | 3.5E-07 | conf | conf | 1.2E-02 | 1.7E-06 | 6.1E-01 | -9.26  | -9     |        |       |      |      |         |         |

|      |              |                                                                                                                                                                                                                                                                                                                                                                                                                                                                                                                                                                                                                                                                                                                                                                                                                                                                                                                                                                                                                                                                                                                                                                                                                                                                                                                                                                                                                                                                                                                                                                                                                                                                                                                                                                                                                                                                                                                                                                                                                                                                                                                                                                                                                                                                                                                                                                                                                                                                                                                                                                                                                                                                                                                                                                                                                                                                                                                                                                                                                                                                                                                                                                                                                                                                                                                                                                                                                                                                                                                                                                                                                                                                                                                                                                                                                                                                                                                                                                                                                                                                                                     |     |     |         |          |          |      |         |         |         |      |         |         |         |       |       |        |       |      |      |      |         |
|------|--------------|-----------------------------------------------------------------------------------------------------------------------------------------------------------------------------------------------------------------------------------------------------------------------------------------------------------------------------------------------------------------------------------------------------------------------------------------------------------------------------------------------------------------------------------------------------------------------------------------------------------------------------------------------------------------------------------------------------------------------------------------------------------------------------------------------------------------------------------------------------------------------------------------------------------------------------------------------------------------------------------------------------------------------------------------------------------------------------------------------------------------------------------------------------------------------------------------------------------------------------------------------------------------------------------------------------------------------------------------------------------------------------------------------------------------------------------------------------------------------------------------------------------------------------------------------------------------------------------------------------------------------------------------------------------------------------------------------------------------------------------------------------------------------------------------------------------------------------------------------------------------------------------------------------------------------------------------------------------------------------------------------------------------------------------------------------------------------------------------------------------------------------------------------------------------------------------------------------------------------------------------------------------------------------------------------------------------------------------------------------------------------------------------------------------------------------------------------------------------------------------------------------------------------------------------------------------------------------------------------------------------------------------------------------------------------------------------------------------------------------------------------------------------------------------------------------------------------------------------------------------------------------------------------------------------------------------------------------------------------------------------------------------------------------------------------------------------------------------------------------------------------------------------------------------------------------------------------------------------------------------------------------------------------------------------------------------------------------------------------------------------------------------------------------------------------------------------------------------------------------------------------------------------------------------------------------------------------------------------------------------------------------------------------------------------------------------------------------------------------------------------------------------------------------------------------------------------------------------------------------------------------------------------------------------------------------------------------------------------------------------------------------------------------------------------------------------------------------------------------------|-----|-----|---------|----------|----------|------|---------|---------|---------|------|---------|---------|---------|-------|-------|--------|-------|------|------|------|---------|
| 1440 | 119001-201   | [2]-benzyl-2-(phenylglycidyl)-1-phenyl(methanol [2E]-but-2-enedioate [1:1])                                                                                                                                                                                                                                                                                                                                                                                                                                                                                                                                                                                                                                                                                                                                                                                                                                                                                                                                                                                                                                                                                                                                                                                                                                                                                                                                                                                                                                                                                                                                                                                                                                                                                                                                                                                                                                                                                                                                                                                                                                                                                                                                                                                                                                                                                                                                                                                                                                                                                                                                                                                                                                                                                                                                                                                                                                                                                                                                                                                                                                                                                                                                                                                                                                                                                                                                                                                                                                                                                                                                                                                                                                                                                                                                                                                                                                                                                                                                                                                                                         | 475 | 87  | 9.9E-03 | 3.38E+02 | 3.00E+02 | 1.40 | 3.5E-06 | 1.3E-07 | 6.6E-09 | conf | 9.1E+01 | 1.3E+00 | 4.6E+01 | -7.05 | -7.37 | -9.03  | -1.84 | 0.64 | 0.0% | 0.0% | 4.5E-25 |
| 1441 | 114-49-8     | lysine hydrobromide                                                                                                                                                                                                                                                                                                                                                                                                                                                                                                                                                                                                                                                                                                                                                                                                                                                                                                                                                                                                                                                                                                                                                                                                                                                                                                                                                                                                                                                                                                                                                                                                                                                                                                                                                                                                                                                                                                                                                                                                                                                                                                                                                                                                                                                                                                                                                                                                                                                                                                                                                                                                                                                                                                                                                                                                                                                                                                                                                                                                                                                                                                                                                                                                                                                                                                                                                                                                                                                                                                                                                                                                                                                                                                                                                                                                                                                                                                                                                                                                                                                                                 | 124 | 87  | 9.9E-03 | 3.38E+02 | 3.00E+02 | 1.40 | 3.5E-06 | 1.3E-07 | 6.6E-09 | conf | 9.1E+01 | 1.3E+00 | 4.6E+01 | -7.05 | -7.37 | -9.03  | -1.84 | 0.64 | 0.0% | 0.0% | 4.5E-25 |
| 1442 | 7400-273     | tert-butylhydroxydimethylsiloxane                                                                                                                                                                                                                                                                                                                                                                                                                                                                                                                                                                                                                                                                                                                                                                                                                                                                                                                                                                                                                                                                                                                                                                                                                                                                                                                                                                                                                                                                                                                                                                                                                                                                                                                                                                                                                                                                                                                                                                                                                                                                                                                                                                                                                                                                                                                                                                                                                                                                                                                                                                                                                                                                                                                                                                                                                                                                                                                                                                                                                                                                                                                                                                                                                                                                                                                                                                                                                                                                                                                                                                                                                                                                                                                                                                                                                                                                                                                                                                                                                                                                   | 125 | 87  | 9.9E-03 | 3.38E+02 | 3.00E+02 | 1.40 | 3.5E-06 | 1.3E-07 | 6.6E-09 | conf | 9.1E+01 | 1.3E+00 | 4.6E+01 | -7.05 | -7.37 | -9.03  | -1.84 | 0.64 | 0.0% | 0.0% | 5.1E-25 |
| 1443 | 122627-17-6  | 6-(13,3-d-tert-butyl-2,5,5-dimethylphenyl)-2,2'-di(bisoxyl)[bis(benzodioxol-5,2,1,3-dioxaphosphine)]                                                                                                                                                                                                                                                                                                                                                                                                                                                                                                                                                                                                                                                                                                                                                                                                                                                                                                                                                                                                                                                                                                                                                                                                                                                                                                                                                                                                                                                                                                                                                                                                                                                                                                                                                                                                                                                                                                                                                                                                                                                                                                                                                                                                                                                                                                                                                                                                                                                                                                                                                                                                                                                                                                                                                                                                                                                                                                                                                                                                                                                                                                                                                                                                                                                                                                                                                                                                                                                                                                                                                                                                                                                                                                                                                                                                                                                                                                                                                                                                | 787 | 87  | 9.9E-03 | 3.38E+02 | 3.00E+02 | 1.40 | 3.5E-06 | 1.3E-07 | 6.6E-09 | conf | 9.1E+01 | 1.3E+00 | 4.6E+01 | -7.05 | -7.37 | -9.03  | -1.84 | 0.64 | 0.0% | 0.0% | 1.7E-26 |
| 1444 | 86645-75-3   | Pyridine-2-chloromethyl-4-methoxy-3,5-dimethyl-, hydrochloride [1:1]                                                                                                                                                                                                                                                                                                                                                                                                                                                                                                                                                                                                                                                                                                                                                                                                                                                                                                                                                                                                                                                                                                                                                                                                                                                                                                                                                                                                                                                                                                                                                                                                                                                                                                                                                                                                                                                                                                                                                                                                                                                                                                                                                                                                                                                                                                                                                                                                                                                                                                                                                                                                                                                                                                                                                                                                                                                                                                                                                                                                                                                                                                                                                                                                                                                                                                                                                                                                                                                                                                                                                                                                                                                                                                                                                                                                                                                                                                                                                                                                                                | 242 | 87  | 9.9E-03 | 3.38E+02 | 3.00E+02 | 1.40 | 3.5E-06 | 1.3E-07 | 6.6E-09 | conf | 9.1E+01 | 1.3E+00 | 4.6E+01 | -7.05 | -7.37 | -9.03  | -1.84 | 0.64 | 0.0% | 0.0% | 2.4E-25 |
| 1445 | 98231-71-1   | 615-328-6                                                                                                                                                                                                                                                                                                                                                                                                                                                                                                                                                                                                                                                                                                                                                                                                                                                                                                                                                                                                                                                                                                                                                                                                                                                                                                                                                                                                                                                                                                                                                                                                                                                                                                                                                                                                                                                                                                                                                                                                                                                                                                                                                                                                                                                                                                                                                                                                                                                                                                                                                                                                                                                                                                                                                                                                                                                                                                                                                                                                                                                                                                                                                                                                                                                                                                                                                                                                                                                                                                                                                                                                                                                                                                                                                                                                                                                                                                                                                                                                                                                                                           | 252 | 87  | 9.9E-03 | 3.38E+02 | 3.00E+02 | 1.40 | 3.5E-06 | 1.3E-07 | 6.6E-09 | conf | 9.1E+01 | 1.3E+00 | 4.6E+01 | -7.05 | -7.37 | -9.03  | -1.84 | 0.64 | 0.0% | 0.0% | 4.7E-25 |
| 1446 | 55-41-9      | N-methylthiosuccinimide                                                                                                                                                                                                                                                                                                                                                                                                                                                                                                                                                                                                                                                                                                                                                                                                                                                                                                                                                                                                                                                                                                                                                                                                                                                                                                                                                                                                                                                                                                                                                                                                                                                                                                                                                                                                                                                                                                                                                                                                                                                                                                                                                                                                                                                                                                                                                                                                                                                                                                                                                                                                                                                                                                                                                                                                                                                                                                                                                                                                                                                                                                                                                                                                                                                                                                                                                                                                                                                                                                                                                                                                                                                                                                                                                                                                                                                                                                                                                                                                                                                                             | 252 | 87  | 9.9E-03 | 3.38E+02 | 3.00E+02 | 1.40 | 3.5E-06 | 1.3E-07 | 6.6E-09 | conf | 9.1E+01 | 1.3E+00 | 4.6E+01 | -7.05 | -7.37 | -9.03  | -1.84 | 0.64 | 0.0% | 0.0% | 4.5E-25 |
| 1447 | 1124-64-7    | 020-035-3                                                                                                                                                                                                                                                                                                                                                                                                                                                                                                                                                                                                                                                                                                                                                                                                                                                                                                                                                                                                                                                                                                                                                                                                                                                                                                                                                                                                                                                                                                                                                                                                                                                                                                                                                                                                                                                                                                                                                                                                                                                                                                                                                                                                                                                                                                                                                                                                                                                                                                                                                                                                                                                                                                                                                                                                                                                                                                                                                                                                                                                                                                                                                                                                                                                                                                                                                                                                                                                                                                                                                                                                                                                                                                                                                                                                                                                                                                                                                                                                                                                                                           | 227 | 87  | 9.9E-03 | 3.38E+02 | 3.00E+02 | 1.40 | 3.5E-06 | 1.3E-07 | 6.6E-09 | conf | 9.1E+01 | 1.3E+00 | 4.6E+01 | -7.05 | -7.37 | -9.03  | -1.84 | 0.64 | 0.0% | 0.0% | 4.5E-25 |
| 1448 | 183335-47-8  | [3S]-N,N-dimethyl-3-(naphthalen-1-yl)-3-(thiophen-2-yl)propan-1-amine ethanedisulfate                                                                                                                                                                                                                                                                                                                                                                                                                                                                                                                                                                                                                                                                                                                                                                                                                                                                                                                                                                                                                                                                                                                                                                                                                                                                                                                                                                                                                                                                                                                                                                                                                                                                                                                                                                                                                                                                                                                                                                                                                                                                                                                                                                                                                                                                                                                                                                                                                                                                                                                                                                                                                                                                                                                                                                                                                                                                                                                                                                                                                                                                                                                                                                                                                                                                                                                                                                                                                                                                                                                                                                                                                                                                                                                                                                                                                                                                                                                                                                                                               | 401 | 87  | 9.9E-03 | 3.38E+02 | 3.00E+02 | 1.40 | 3.5E-06 | 1.3E-07 | 6.6E-09 | conf | 9.1E+01 | 1.3E+00 | 4.6E+01 | -7.05 | -7.37 | -9.03  | -1.84 | 0.64 | 0.0% | 0.0% | 4.5E-25 |
| 1449 | 15255-77-9   | [1S]-2-Oxotetrahydropyran-3-aminium bromide                                                                                                                                                                                                                                                                                                                                                                                                                                                                                                                                                                                                                                                                                                                                                                                                                                                                                                                                                                                                                                                                                                                                                                                                                                                                                                                                                                                                                                                                                                                                                                                                                                                                                                                                                                                                                                                                                                                                                                                                                                                                                                                                                                                                                                                                                                                                                                                                                                                                                                                                                                                                                                                                                                                                                                                                                                                                                                                                                                                                                                                                                                                                                                                                                                                                                                                                                                                                                                                                                                                                                                                                                                                                                                                                                                                                                                                                                                                                                                                                                                                         | 182 | 87  | 9.9E-03 | 3.38E+02 | 3.00E+02 | 1.40 | 3.5E-06 | 1.3E-07 | 6.6E-09 | conf | 9.1E+01 | 1.3E+00 | 4.6E+01 | -7.05 | -7.37 | -9.03  | -1.84 | 0.64 | 0.0% | 0.0% | 4.5E-25 |
| 1450 | 25217-48-9   | 607-657-8                                                                                                                                                                                                                                                                                                                                                                                                                                                                                                                                                                                                                                                                                                                                                                                                                                                                                                                                                                                                                                                                                                                                                                                                                                                                                                                                                                                                                                                                                                                                                                                                                                                                                                                                                                                                                                                                                                                                                                                                                                                                                                                                                                                                                                                                                                                                                                                                                                                                                                                                                                                                                                                                                                                                                                                                                                                                                                                                                                                                                                                                                                                                                                                                                                                                                                                                                                                                                                                                                                                                                                                                                                                                                                                                                                                                                                                                                                                                                                                                                                                                                           | 489 | 87  | 9.9E-03 | 3.38E+02 | 3.00E+02 | 1.40 | 3.5E-06 | 1.3E-07 | 6.6E-09 | conf | 9.1E+01 | 1.3E+00 | 4.6E+01 | -7.05 | -7.37 | -9.03  | -1.84 | 0.64 | 0.0% | 0.0% | 4.4E-25 |
| 1451 | 780280-5     | 1-naphthalenemethanamine, N-[2]-(6,6-dimethyl-2-hepten-4-yl)-N-1-yl-, N-methyl-, hydrochloride [1:1]                                                                                                                                                                                                                                                                                                                                                                                                                                                                                                                                                                                                                                                                                                                                                                                                                                                                                                                                                                                                                                                                                                                                                                                                                                                                                                                                                                                                                                                                                                                                                                                                                                                                                                                                                                                                                                                                                                                                                                                                                                                                                                                                                                                                                                                                                                                                                                                                                                                                                                                                                                                                                                                                                                                                                                                                                                                                                                                                                                                                                                                                                                                                                                                                                                                                                                                                                                                                                                                                                                                                                                                                                                                                                                                                                                                                                                                                                                                                                                                                | 328 | 87  | 9.9E-03 | 3.38E+02 | 3.00E+02 | 1.40 | 3.5E-06 | 1.3E-07 | 6.6E-09 | conf | 9.1E+01 | 1.3E+00 | 4.6E+01 | -7.05 | -7.37 | -9.03  | -1.84 | 0.64 | 0.0% | 0.0% | 3.2E-12 |
| 1452 | 106468-95-0  | N-(benzylmethyl-3-oxocyclohexanemethylidene) hydrochloride                                                                                                                                                                                                                                                                                                                                                                                                                                                                                                                                                                                                                                                                                                                                                                                                                                                                                                                                                                                                                                                                                                                                                                                                                                                                                                                                                                                                                                                                                                                                                                                                                                                                                                                                                                                                                                                                                                                                                                                                                                                                                                                                                                                                                                                                                                                                                                                                                                                                                                                                                                                                                                                                                                                                                                                                                                                                                                                                                                                                                                                                                                                                                                                                                                                                                                                                                                                                                                                                                                                                                                                                                                                                                                                                                                                                                                                                                                                                                                                                                                          | 172 | 87  | 9.9E-03 | 3.38E+02 | 3.00E+02 | 1.40 | 3.5E-06 | 1.3E-07 | 6.6E-09 | conf | 9.1E+01 | 1.3E+00 | 4.6E+01 | -7.05 | -7.37 | -9.03  | -1.84 | 0.64 | 0.0% | 0.0% | 4.8E-25 |
| 1453 | 83393-23-1   | 8-benzyl-3-oxo-8-azabicyclo[3.2.1]octane hydrochloride                                                                                                                                                                                                                                                                                                                                                                                                                                                                                                                                                                                                                                                                                                                                                                                                                                                                                                                                                                                                                                                                                                                                                                                                                                                                                                                                                                                                                                                                                                                                                                                                                                                                                                                                                                                                                                                                                                                                                                                                                                                                                                                                                                                                                                                                                                                                                                                                                                                                                                                                                                                                                                                                                                                                                                                                                                                                                                                                                                                                                                                                                                                                                                                                                                                                                                                                                                                                                                                                                                                                                                                                                                                                                                                                                                                                                                                                                                                                                                                                                                              | 252 | 87  | 9.9E-03 | 3.38E+02 | 3.00E+02 | 1.40 | 3.5E-06 | 1.3E-07 | 6.6E-09 | conf | 9.1E+01 | 1.3E+00 | 4.6E+01 | -7.05 | -7.37 | -9.03  | -1.84 | 0.64 | 0.0% | 0.0% | 4.7E-25 |
| 1454 | 859-18-7     | methyl (2S-trans)-2-amino-6-oxo-6-[[1-methyl-4-propylpyridin-2-yl]carbamoyl]-1-thio-erythro-D-glucal-4-ol                                                                                                                                                                                                                                                                                                                                                                                                                                                                                                                                                                                                                                                                                                                                                                                                                                                                                                                                                                                                                                                                                                                                                                                                                                                                                                                                                                                                                                                                                                                                                                                                                                                                                                                                                                                                                                                                                                                                                                                                                                                                                                                                                                                                                                                                                                                                                                                                                                                                                                                                                                                                                                                                                                                                                                                                                                                                                                                                                                                                                                                                                                                                                                                                                                                                                                                                                                                                                                                                                                                                                                                                                                                                                                                                                                                                                                                                                                                                                                                           | 443 | 87  | 9.9E-03 | 3.38E+02 | 3.00E+02 | 1.40 | 3.5E-06 | 1.3E-07 | 6.6E-09 | conf | 9.1E+01 | 1.3E+00 | 4.6E+01 | -7.05 | -7.37 | -9.03  | -1.84 | 0.64 | 0.0% | 0.0% | 2.8E-20 |
| 1455 | 888688-62-1  | 692                                                                                                                                                                                                                                                                                                                                                                                                                                                                                                                                                                                                                                                                                                                                                                                                                                                                                                                                                                                                                                                                                                                                                                                                                                                                                                                                                                                                                                                                                                                                                                                                                                                                                                                                                                                                                                                                                                                                                                                                                                                                                                                                                                                                                                                                                                                                                                                                                                                                                                                                                                                                                                                                                                                                                                                                                                                                                                                                                                                                                                                                                                                                                                                                                                                                                                                                                                                                                                                                                                                                                                                                                                                                                                                                                                                                                                                                                                                                                                                                                                                                                                 | 382 | 87  | 9.9E-03 | 3.38E+02 | 3.00E+02 | 1.40 | 3.5E-06 | 1.3E-07 | 6.6E-09 | conf | 9.1E+01 | 1.3E+00 | 4.6E+01 | -7.05 | -7.37 | -9.03  | -1.84 | 0.64 | 0.0% | 0.0% | 3.1E-26 |
| 1456 | 581076-677   | Benzamide, N-[3-[diminoimino(methylamino)-4-methylphenyl]-4-(6-methyl-1-piperazinyl)methyl]-                                                                                                                                                                                                                                                                                                                                                                                                                                                                                                                                                                                                                                                                                                                                                                                                                                                                                                                                                                                                                                                                                                                                                                                                                                                                                                                                                                                                                                                                                                                                                                                                                                                                                                                                                                                                                                                                                                                                                                                                                                                                                                                                                                                                                                                                                                                                                                                                                                                                                                                                                                                                                                                                                                                                                                                                                                                                                                                                                                                                                                                                                                                                                                                                                                                                                                                                                                                                                                                                                                                                                                                                                                                                                                                                                                                                                                                                                                                                                                                                        | 417 | 87  | 9.9E-03 | 3.38E+02 | 3.00E+02 | 1.40 | 3.5E-06 | 1.3E-07 | 6.6E-09 | conf | 9.1E+01 | 1.3E+00 | 4.6E+01 | -7.05 | -7.37 | -9.03  | -1.84 | 0.64 | 0.0% | 0.0% | 5.4E-29 |
| 1457 | 12346-46-3   | N,N,N-trimethyl-N-(2-oxo-1,3-dioxol-5-yl)-N-methyl-2-oxo-1,3-dioxol-5-yl-1-amine chloride                                                                                                                                                                                                                                                                                                                                                                                                                                                                                                                                                                                                                                                                                                                                                                                                                                                                                                                                                                                                                                                                                                                                                                                                                                                                                                                                                                                                                                                                                                                                                                                                                                                                                                                                                                                                                                                                                                                                                                                                                                                                                                                                                                                                                                                                                                                                                                                                                                                                                                                                                                                                                                                                                                                                                                                                                                                                                                                                                                                                                                                                                                                                                                                                                                                                                                                                                                                                                                                                                                                                                                                                                                                                                                                                                                                                                                                                                                                                                                                                           | 230 | 87  | 9.9E-03 | 3.38E+02 | 3.00E+02 | 1.40 | 3.5E-06 | 1.3E-07 | 6.6E-09 | conf | 9.1E+01 | 1.3E+00 | 4.6E+01 | -7.05 | -7.37 | -9.03  | -1.84 | 0.64 | 0.0% | 0.0% | 4.8E-25 |
| 1458 | 657-27-2     | lysine hydrochloride                                                                                                                                                                                                                                                                                                                                                                                                                                                                                                                                                                                                                                                                                                                                                                                                                                                                                                                                                                                                                                                                                                                                                                                                                                                                                                                                                                                                                                                                                                                                                                                                                                                                                                                                                                                                                                                                                                                                                                                                                                                                                                                                                                                                                                                                                                                                                                                                                                                                                                                                                                                                                                                                                                                                                                                                                                                                                                                                                                                                                                                                                                                                                                                                                                                                                                                                                                                                                                                                                                                                                                                                                                                                                                                                                                                                                                                                                                                                                                                                                                                                                | 183 | 87  | 9.9E-03 | 3.38E+02 | 3.00E+02 | 1.40 | 3.5E-06 | 1.3E-07 | 6.6E-09 | conf | 9.1E+01 | 1.3E+00 | 4.6E+01 | -7.05 | -7.37 | -9.03  | -1.84 | 0.64 | 0.0% | 0.0% | 4.9E-25 |
| 1459 | 10647-50-7   | 600-588-4                                                                                                                                                                                                                                                                                                                                                                                                                                                                                                                                                                                                                                                                                                                                                                                                                                                                                                                                                                                                                                                                                                                                                                                                                                                                                                                                                                                                                                                                                                                                                                                                                                                                                                                                                                                                                                                                                                                                                                                                                                                                                                                                                                                                                                                                                                                                                                                                                                                                                                                                                                                                                                                                                                                                                                                                                                                                                                                                                                                                                                                                                                                                                                                                                                                                                                                                                                                                                                                                                                                                                                                                                                                                                                                                                                                                                                                                                                                                                                                                                                                                                           | 292 | 87  | 9.9E-03 | 3.38E+02 | 3.00E+02 | 1.40 | 3.5E-06 | 1.3E-07 | 6.6E-09 | conf | 9.1E+01 | 1.3E+00 | 4.6E+01 | -7.05 | -7.37 | -9.03  | -1.84 | 0.64 | 0.0% | 0.0% | 4.7E-25 |
| 1460 | 68477-29-8   | 034-977-1                                                                                                                                                                                                                                                                                                                                                                                                                                                                                                                                                                                                                                                                                                                                                                                                                                                                                                                                                                                                                                                                                                                                                                                                                                                                                                                                                                                                                                                                                                                                                                                                                                                                                                                                                                                                                                                                                                                                                                                                                                                                                                                                                                                                                                                                                                                                                                                                                                                                                                                                                                                                                                                                                                                                                                                                                                                                                                                                                                                                                                                                                                                                                                                                                                                                                                                                                                                                                                                                                                                                                                                                                                                                                                                                                                                                                                                                                                                                                                                                                                                                                           | 119 | 87  | 9.9E-03 | 3.38E+02 | 3.00E+02 | 1.40 | 3.5E-06 | 1.3E-07 | 6.6E-09 | conf | 9.1E+01 | 1.3E+00 | 4.6E+01 | -7.05 | -7.37 | -9.03  | -1.84 | 0.64 | 0.0% | 0.0% | 4.1E-25 |
| 1461 | 1181651-55-1 | 1-(1-isopropyl-1,3-thiazol-4-yl)-N-methylmethanamine dihydrochloride                                                                                                                                                                                                                                                                                                                                                                                                                                                                                                                                                                                                                                                                                                                                                                                                                                                                                                                                                                                                                                                                                                                                                                                                                                                                                                                                                                                                                                                                                                                                                                                                                                                                                                                                                                                                                                                                                                                                                                                                                                                                                                                                                                                                                                                                                                                                                                                                                                                                                                                                                                                                                                                                                                                                                                                                                                                                                                                                                                                                                                                                                                                                                                                                                                                                                                                                                                                                                                                                                                                                                                                                                                                                                                                                                                                                                                                                                                                                                                                                                                | 243 | 87  | 9.9E-03 | 3.38E+02 | 3.00E+02 | 1.40 | 3.5E-06 | 1.3E-07 | 6.6E-09 | conf | 9.1E+01 | 1.3E+00 | 4.6E+01 | -7.05 | -7.37 | -9.03  | -1.84 | 0.64 | 0.0% | 0.0% | 4.8E-25 |
| 1462 | 66-84-2      | glucosamine hydrochloride                                                                                                                                                                                                                                                                                                                                                                                                                                                                                                                                                                                                                                                                                                                                                                                                                                                                                                                                                                                                                                                                                                                                                                                                                                                                                                                                                                                                                                                                                                                                                                                                                                                                                                                                                                                                                                                                                                                                                                                                                                                                                                                                                                                                                                                                                                                                                                                                                                                                                                                                                                                                                                                                                                                                                                                                                                                                                                                                                                                                                                                                                                                                                                                                                                                                                                                                                                                                                                                                                                                                                                                                                                                                                                                                                                                                                                                                                                                                                                                                                                                                           | 216 | 87  | 9.9E-03 | 3.38E+02 | 3.00E+02 | 1.40 | 3.5E-06 | 1.3E-07 | 6.6E-09 | conf | 9.1E+01 | 1.3E+00 | 4.6E+01 | -7.05 | -7.37 | -9.03  | -1.84 | 0.64 | 0.0% | 0.0% | 4.7E-25 |
| 1463 | 974-43-4     | 609-368-7                                                                                                                                                                                                                                                                                                                                                                                                                                                                                                                                                                                                                                                                                                                                                                                                                                                                                                                                                                                                                                                                                                                                                                                                                                                                                                                                                                                                                                                                                                                                                                                                                                                                                                                                                                                                                                                                                                                                                                                                                                                                                                                                                                                                                                                                                                                                                                                                                                                                                                                                                                                                                                                                                                                                                                                                                                                                                                                                                                                                                                                                                                                                                                                                                                                                                                                                                                                                                                                                                                                                                                                                                                                                                                                                                                                                                                                                                                                                                                                                                                                                                           | 128 | 87  | 9.9E-03 | 3.38E+02 | 3.00E+02 | 1.40 | 3.5E-06 | 1.3E-07 | 6.6E-09 | conf | 9.1E+01 | 1.3E+00 | 4.6E+01 | -7.05 | -7.37 | -9.03  | -1.84 | 0.64 | 0.0% | 0.0% | 5.1E-25 |
| 1464 | 33719-11-8   | [3aR,8aR,8bS]-1,3-Dibenzyl-2-oxodicyclohexenol-1,2,3,4,5,6,7,8,9,10,11,12,13,14,15,16,17,18,19,20,21,22,23,24,25,26,27,28,29,30,31,32,33,34,35,36,37,38,39,40,41,42,43,44,45,46,47,48,49,50,51,52,53,54,55,56,57,58,59,60,61,62,63,64,65,66,67,68,69,70,71,72,73,74,75,76,77,78,79,80,81,82,83,84,85,86,87,88,89,90,91,92,93,94,95,96,97,98,99,100,101,102,103,104,105,106,107,108,109,110,111,112,113,114,115,116,117,118,119,120,121,122,123,124,125,126,127,128,129,130,131,132,133,134,135,136,137,138,139,140,141,142,143,144,145,146,147,148,149,150,151,152,153,154,155,156,157,158,159,160,161,162,163,164,165,166,167,168,169,170,171,172,173,174,175,176,177,178,179,180,181,182,183,184,185,186,187,188,189,190,191,192,193,194,195,196,197,198,199,200,201,202,203,204,205,206,207,208,209,210,211,212,213,214,215,216,217,218,219,220,221,222,223,224,225,226,227,228,229,230,231,232,233,234,235,236,237,238,239,240,241,242,243,244,245,246,247,248,249,250,251,252,253,254,255,256,257,258,259,260,261,262,263,264,265,266,267,268,269,270,271,272,273,274,275,276,277,278,279,280,281,282,283,284,285,286,287,288,289,290,291,292,293,294,295,296,297,298,299,300,301,302,303,304,305,306,307,308,309,310,311,312,313,314,315,316,317,318,319,320,321,322,323,324,325,326,327,328,329,330,331,332,333,334,335,336,337,338,339,340,341,342,343,344,345,346,347,348,349,350,351,352,353,354,355,356,357,358,359,360,361,362,363,364,365,366,367,368,369,370,371,372,373,374,375,376,377,378,379,380,381,382,383,384,385,386,387,388,389,390,391,392,393,394,395,396,397,398,399,400,401,402,403,404,405,406,407,408,409,410,411,412,413,414,415,416,417,418,419,420,421,422,423,424,425,426,427,428,429,430,431,432,433,434,435,436,437,438,439,440,441,442,443,444,445,446,447,448,449,450,451,452,453,454,455,456,457,458,459,460,461,462,463,464,465,466,467,468,469,470,471,472,473,474,475,476,477,478,479,480,481,482,483,484,485,486,487,488,489,490,491,492,493,494,495,496,497,498,499,500,501,502,503,504,505,506,507,508,509,510,511,512,513,514,515,516,517,518,519,520,521,522,523,524,525,526,527,528,529,530,531,532,533,534,535,536,537,538,539,540,541,542,543,544,545,546,547,548,549,550,551,552,553,554,555,556,557,558,559,560,561,562,563,564,565,566,567,568,569,570,571,572,573,574,575,576,577,578,579,580,581,582,583,584,585,586,587,588,589,590,591,592,593,594,595,596,597,598,599,600,601,602,603,604,605,606,607,608,609,610,611,612,613,614,615,616,617,618,619,620,621,622,623,624,625,626,627,628,629,630,631,632,633,634,635,636,637,638,639,640,641,642,643,644,645,646,647,648,649,650,651,652,653,654,655,656,657,658,659,660,661,662,663,664,665,666,667,668,669,670,671,672,673,674,675,676,677,678,679,680,681,682,683,684,685,686,687,688,689,690,691,692,693,694,695,696,697,698,699,700,701,702,703,704,705,706,707,708,709,710,711,712,713,714,715,716,717,718,719,720,721,722,723,724,725,726,727,728,729,730,731,732,733,734,735,736,737,738,739,740,741,742,743,744,745,746,747,748,749,750,751,752,753,754,755,756,757,758,759,760,761,762,763,764,765,766,767,768,769,770,771,772,773,774,775,776,777,778,779,780,781,782,783,784,785,786,787,788,789,790,791,792,793,794,795,796,797,798,799,800,801,802,803,804,805,806,807,808,809,810,811,812,813,814,815,816,817,818,819,820,821,822,823,824,825,826,827,828,829,830,831,832,833,834,835,836,837,838,839,840,841,842,843,844,845,846,847,848,849,850,851,852,853,854,855,856,857,858,859,860,861,862,863,864,865,866,867,868,869,870,871,872,873,874,875,876,877,878,879,880,881,882,883,884,885,886,887,888,889,890,891,892,893,894,895,896,897,898,899,900,901,902,903,904,905,906,907,908,909,910,911,912,913,914,915,916,917,918,919,920,921,922,923,924,925,926,927,928,929,930,931,932,933,934,935,936,937,938,939,940,941,942,943,944,945,946,947,948,949,950,951,952,953,954,955,956,957,958,959,960,961,962,963,964,965,966,967,968,969,970,971,972,973,974,975,976,977,978,979,980,981,982,983,984,985,986,987,988,989,990,991,992,993,994,995,996,997,998,999,1000 | 245 | 87  | 9.9E-03 | 3.38E+02 | 3.00E+02 | 1.40 | 3.5E-06 | 1.3E-07 | 6.6E-09 | conf | 9.1E+01 | 1.3E+00 | 4.6E+01 | -7.05 | -7.37 | -9.03  | -1.84 | 0.64 | 0.0% | 0.0% | 6.2E-27 |
| 1465 | 10545-90-0   | valeryl diethanol ether                                                                                                                                                                                                                                                                                                                                                                                                                                                                                                                                                                                                                                                                                                                                                                                                                                                                                                                                                                                                                                                                                                                                                                                                                                                                                                                                                                                                                                                                                                                                                                                                                                                                                                                                                                                                                                                                                                                                                                                                                                                                                                                                                                                                                                                                                                                                                                                                                                                                                                                                                                                                                                                                                                                                                                                                                                                                                                                                                                                                                                                                                                                                                                                                                                                                                                                                                                                                                                                                                                                                                                                                                                                                                                                                                                                                                                                                                                                                                                                                                                                                             | 105 | 87  | 9.9E-03 | 3.38E+02 | 3.00E+02 | 1.40 | 3.5E-06 | 1.3E-07 | 6.6E-09 | conf | 9.1E+01 | 1.3E+00 | 4.6E+01 | -7.05 | -7.37 | -9.03  | -1.84 | 0.64 | 0.0% | 0.0% | 5.2E-25 |
| 1466 | 22252-43-8   | (6R-trans)-7-amino-3-methyl-8-oxo-2-thia-azabicyclo[4.2.0]oct-2-ene-2-carboxylic acid                                                                                                                                                                                                                                                                                                                                                                                                                                                                                                                                                                                                                                                                                                                                                                                                                                                                                                                                                                                                                                                                                                                                                                                                                                                                                                                                                                                                                                                                                                                                                                                                                                                                                                                                                                                                                                                                                                                                                                                                                                                                                                                                                                                                                                                                                                                                                                                                                                                                                                                                                                                                                                                                                                                                                                                                                                                                                                                                                                                                                                                                                                                                                                                                                                                                                                                                                                                                                                                                                                                                                                                                                                                                                                                                                                                                                                                                                                                                                                                                               | 214 | 298 | 1.1E-07 | 8.41E+01 | 1.36E+01 | 1.40 | 3.5E-06 | 1.1E-06 | 3.5E-07 | conf | 1.2E+02 | 1.6E+00 | 6.0E+01 | -6.81 | -7.96 | -10.10 | -9.01 | 1.11 | 0.0% | 0.0% | 1.1E-19 |
| 1467 | 13291-60-8   | d-sec-butylphthalol                                                                                                                                                                                                                                                                                                                                                                                                                                                                                                                                                                                                                                                                                                                                                                                                                                                                                                                                                                                                                                                                                                                                                                                                                                                                                                                                                                                                                                                                                                                                                                                                                                                                                                                                                                                                                                                                                                                                                                                                                                                                                                                                                                                                                                                                                                                                                                                                                                                                                                                                                                                                                                                                                                                                                                                                                                                                                                                                                                                                                                                                                                                                                                                                                                                                                                                                                                                                                                                                                                                                                                                                                                                                                                                                                                                                                                                                                                                                                                                                                                                                                 | 206 | 76  | 4.2E-02 | 4.38E+01 | 2.64E+05 | 1.40 | 3.5E-06 | 1.1E-06 | 3.5E-07 | conf | 9.1E+01 | 1.3E+00 | 4.6E+01 | -7.05 | -7.37 | -9.03  | -1.84 | 0.64 | 0.0% | 0.0% | 3.1E-17 |
| 1468 | 3452-97-9    | 3,5,5-trimethylhexan-3-ol                                                                                                                                                                                                                                                                                                                                                                                                                                                                                                                                                                                                                                                                                                                                                                                                                                                                                                                                                                                                                                                                                                                                                                                                                                                                                                                                                                                                                                                                                                                                                                                                                                                                                                                                                                                                                                                                                                                                                                                                                                                                                                                                                                                                                                                                                                                                                                                                                                                                                                                                                                                                                                                                                                                                                                                                                                                                                                                                                                                                                                                                                                                                                                                                                                                                                                                                                                                                                                                                                                                                                                                                                                                                                                                                                                                                                                                                                                                                                                                                                                                                           | 144 | -19 | 1.4E-01 | 1.21E+02 | 1.38E+01 | 1.40 | 3.5E-06 | 1.4E-07 | 3.5E-06 | conf | 8.8E+01 | 1.2E+00 | 4.4E+01 | -9.39 | -9.11 | -10.49 | -8.38 | 0.18 | 0.0% | 0.0% | 5.2E-16 |
| 1469 | 345-92-6     | bis(4-fluorophenyl) ketone                                                                                                                                                                                                                                                                                                                                                                                                                                                                                                                                                                                                                                                                                                                                                                                                                                                                                                                                                                                                                                                                                                                                                                                                                                                                                                                                                                                                                                                                                                                                                                                                                                                                                                                                                                                                                                                                                                                                                                                                                                                                                                                                                                                                                                                                                                                                                                                                                                                                                                                                                                                                                                                                                                                                                                                                                                                                                                                                                                                                                                                                                                                                                                                                                                                                                                                                                                                                                                                                                                                                                                                                                                                                                                                                                                                                                                                                                                                                                                                                                                                                          | 218 | 75  | 6.6E-02 | 5.15E+01 | 3.5E+01  | 1.40 | 3.5E-06 | 1.1E-06 | 3.5E-07 | conf | 1.1E+02 | 1.5E+00 | 5.6E+01 | -9.07 | -8.87 | -10.32 | -2.39 | 0.48 | 0.0% | 0.0% | 4.9E-30 |
| 1470 | 26756-46-5   | N-(2,3-dihydro-2H-benzofuran-5-yl)-N-isobutylamide                                                                                                                                                                                                                                                                                                                                                                                                                                                                                                                                                                                                                                                                                                                                                                                                                                                                                                                                                                                                                                                                                                                                                                                                                                                                                                                                                                                                                                                                                                                                                                                                                                                                                                                                                                                                                                                                                                                                                                                                                                                                                                                                                                                                                                                                                                                                                                                                                                                                                                                                                                                                                                                                                                                                                                                                                                                                                                                                                                                                                                                                                                                                                                                                                                                                                                                                                                                                                                                                                                                                                                                                                                                                                                                                                                                                                                                                                                                                                                                                                                                  | 233 | 189 | 3.7E-03 | 1.28E+04 | 1.70E+02 | 2.3  | 3.5E-06 | 3.5E-07 | 1.2E-07 | conf | 1.0E+02 | 1.5E+00 | 5.6E+01 | -6.49 | -7.60 | -9.01  | -1.33 | 0.61 | 0.0% | 0.0% | 9.7E-32 |
| 1471 | 62158-65-4   | 3-tert-butylphenyl-2-methylpropanedialdehyde                                                                                                                                                                                                                                                                                                                                                                                                                                                                                                                                                                                                                                                                                                                                                                                                                                                                                                                                                                                                                                                                                                                                                                                                                                                                                                                                                                                                                                                                                                                                                                                                                                                                                                                                                                                                                                                                                                                                                                                                                                                                                                                                                                                                                                                                                                                                                                                                                                                                                                                                                                                                                                                                                                                                                                                                                                                                                                                                                                                                                                                                                                                                                                                                                                                                                                                                                                                                                                                                                                                                                                                                                                                                                                                                                                                                                                                                                                                                                                                                                                                        | 204 | 46  | 4.8E-01 | 4.00E+01 | 2.38E+04 | 1.40 | 3.5E-06 | 3.5E-07 | 1.1E-07 | conf |         |         |         |       |       |        |       |      |      |      |         |

|      |             |                                                                                                                                                                          |     |         |          |          |         |         |         |         |         |         |         |          |          |        |        |        |       |        |      |         |         |
|------|-------------|--------------------------------------------------------------------------------------------------------------------------------------------------------------------------|-----|---------|----------|----------|---------|---------|---------|---------|---------|---------|---------|----------|----------|--------|--------|--------|-------|--------|------|---------|---------|
| 1623 | 693-98-1    | 2-methylimidazole                                                                                                                                                        | 82  | 36      | 9.82E-02 | 5.00E-04 | 3.1E-01 | 8.0     | 3.5E-06 | 5.0E-07 | 1.1E-07 | conf    | 9.5E-01 | 1.3E-08  | 4.88E-01 | -6.93  | -7.81  | 9.78   | -0.63 | 0.19   | 0.0% | 0.0%    | 2.4E-39 |
| 1624 | 52290-44-9  | 4-amino-5-dimethoxy-N-phenylbenzenesulphonamide                                                                                                                          | 308 | 35      | 4.62E-07 | 7.05E-07 | 1.7E-01 | 3.9     | 3.5E-06 | 1.1E-07 | 1.1E-07 | conf    | 1.0E-01 | 1.4E-08  | 2.96E-07 | -7.01  | -8.32  | -0.47  | -0.31 | 0.0%   | 0.0% | 5.3E-32 |         |
| 1625 | 78-26-2     | 2-methylpropylpropane-1,3-diol                                                                                                                                           | 132 | 21      | 3.32E-01 | 1.27E-04 | 1.4E-01 | 1.40    | 3.5E-06 | 1.1E-06 | 1.1E-06 | conf    | 1.0E-02 | 1.4E-08  | 5.26E-01 | -8.34  | -8.53  | -0.30  | -0.50 | 0.0%   | 0.0% | 2.9E-44 |         |
| 1626 | 941-69-5    | N-phenylmaleimide                                                                                                                                                        | 173 | 151     | 5.39E-04 | 4.97E-04 | 7.6E-01 | 1.40    | 3.5E-06 | 1.1E-06 | 1.1E-06 | conf    | 1.0E-02 | 1.4E-08  | 5.26E-01 | -7.51  | -8.49  | -0.30  | -0.13 | 0.0%   | 0.0% | 6.3E-25 |         |
| 1627 | 74-83-9     | bromobenzene                                                                                                                                                             | 134 | 105     | 2.11E-05 | 1.20E-05 | 1.4E-01 | 1.40    | 3.5E-06 | 1.1E-06 | 1.1E-06 | conf    | 1.0E-02 | 1.4E-08  | 5.26E-01 | -7.51  | -8.49  | -0.30  | -0.13 | 0.0%   | 0.0% | 5.4E-43 |         |
| 1628 | 114822-16-5 | 601-332-4                                                                                                                                                                | 355 | 193     | 8.95E-09 | 7.47E-04 | 1.2E-01 | 1.10    | 3.5E-06 | 1.1E-06 | 3.5E-07 | conf    | 9.2E-01 | 1.3E-08  | 4.71E-01 | -7.76  | -8.80  | -0.32  | -2.89 | 0.1%   | 0.0% | 1.2E-26 |         |
| 1629 | 3634-83-1   | 1,3-bis(methoxymethyl)benzene                                                                                                                                            | 188 | 82      | 1.22E-05 | 3.51E-05 | 1.0E-01 | 1.40    | 3.5E-06 | 1.1E-06 | 1.1E-06 | conf    | 1.0E-02 | 1.4E-08  | 5.33E-01 | -9.23  | -9.38  | -0.84  | -1.45 | 0.4%   | 0.0% | 2.7E-41 |         |
| 1630 | 102-56-7    | 2,5-dimethylpyridine                                                                                                                                                     | 134 | 105     | 2.44E-01 | 8.00E-01 | 1.7E-01 | 3.9     | 3.5E-06 | 1.1E-07 | 1.1E-07 | conf    | 1.0E-02 | 1.4E-08  | 5.33E-01 | -9.23  | -9.38  | -0.84  | -1.45 | 0.4%   | 0.0% | 7.4E-33 |         |
| 1631 | 49564-57-0  | 4-amino-5-methoxy-N,2-dimethylbenzenesulphonamide                                                                                                                        | 230 | 145     | 2.1E-04  | 1.28E-04 | 3.5E-01 | 1.7     | 3.5E-06 | 1.1E-06 | 1.1E-06 | conf    | 1.0E-02 | 1.4E-08  | 5.26E-01 | -7.34  | -8.47  | -0.29  | -1.61 | 0.8%   | 0.0% | 1.4E-35 |         |
| 1632 | 48145-04-6  | 2-phenethylacetic acid                                                                                                                                                   | 132 | 131     | 2.10E-05 | 2.14E-05 | 2.1E-01 | 1.40    | 3.5E-06 | 1.1E-06 | 1.1E-06 | conf    | 1.0E-02 | 1.4E-08  | 5.26E-01 | -7.34  | -8.47  | -0.29  | -1.61 | 0.8%   | 0.0% | 3.1E-30 |         |
| 1633 | 26317-19-9  | methyl 4-tert-butylbenzoate                                                                                                                                              | 192 | 35      | 2.4E-04  | 1.0E-01  | 5.5E-01 | 1.40    | 3.5E-06 | 1.1E-06 | 3.5E-07 | conf    | 9.2E-01 | 1.3E-08  | 4.71E-01 | -7.84  | -8.61  | -0.78  | -0.27 | 0.5%   | 0.0% | 4.4E-32 |         |
| 1634 | 1047-16-1   | 5,12-dihydroquinol[2,3-b]indoline-7,14-dione                                                                                                                             | 212 | 219     | 1.53E-08 | 2.4E-02  | 2.4E-01 | 5.9     | 3.5E-06 | 1.1E-06 | 1.1E-06 | conf    | 1.0E-02 | 1.4E-08  | 5.15E-01 | -7.61  | -8.54  | -0.33  | -0.82 | 0.7%   | 0.0% | 2.4E-42 |         |
| 1635 | 834-12-8    | anestrol (male)                                                                                                                                                          | 132 | 131     | 5.73E-01 | 1.88E-02 | 2.1E-01 | 1.40    | 3.5E-06 | 1.1E-06 | 1.1E-06 | conf    | 1.0E-02 | 1.4E-08  | 5.15E-01 | -7.61  | -8.54  | -0.33  | -0.82 | 0.7%   | 0.0% | 1.1E-34 |         |
| 1636 | 7065-46-5   | 3-dimethyl-2-thiobenzothiazole                                                                                                                                           | 355 | 166     | 1.4E-05  | 3.11E-01 | 2.4E-01 | 1.40    | 3.5E-06 | 1.1E-07 | 6.6E-08 | conf    | 9.1E-01 | 1.3E-08  | 4.55E-01 | -9.52  | -9.16  | -11.06 | -1.13 | 0.4%   | 0.0% | 1.5E-42 |         |
| 1637 | 3056-13-1   | 12,3,8,9,10,5-tetra-2,4,6,12,4,3,4-tetrahydroimidin-1-yl-2-[4-methylbenzoyloxy]methyl]oxadiaz-3-yl-4-amine                                                               | 479 | 305     | 2.0E-14  | 1.3E-02  | 7.9E-01 | 1.40    | 3.5E-06 | 1.1E-06 | 1.1E-06 | conf    | 9.2E-01 | 1.3E-08  | 4.71E-01 | -7.73  | -8.78  | -0.32  | -1.12 | 0.4%   | 0.0% | 4.2E-25 |         |
| 1638 | 94-96-2     | 2-methyl-2-oxo-1,3-dioxane                                                                                                                                               | 132 | 131     | 7.9E-02  | 4.95E-01 | 1.4E-01 | 1.40    | 3.5E-06 | 1.1E-06 | 1.1E-06 | conf    | 9.2E-01 | 1.3E-08  | 4.71E-01 | -8.22  | -8.97  | -0.49  | -0.40 | 0.0%   | 0.0% | 9.7E-46 |         |
| 1639 | 40306-70-0  | 3-acetamido-5-amino-4-hydroxybenzenesulphonic acid                                                                                                                       | 246 | 221     | 5.8E-11  | 3.9E-04  | 3.5E-01 | 0.3     | 3.5E-06 | 1.1E-06 | 1.1E-07 | conf    | 9.0E-01 | 1.4E-08  | 5.15E-01 | -7.79  | -7.99  | -10.16 | -0.61 | 0.2%   | 0.0% | 1.2E-42 |         |
| 1640 | 121-82-4    | perthio-3,5,5-dimethyl-1,3,5-triazine                                                                                                                                    | 133 | 133     | 1.8E-04  | 1.0E-06  | 4.8E-01 | 1.40    | 3.5E-06 | 1.3E-07 | 1.1E-07 | conf    | 9.0E-01 | 1.3E-08  | 4.65E-01 | -6.17  | -7.07  | -0.63  | -0.97 | 0.0%   | 0.0% | 1.4E-29 |         |
| 1641 | 2224-33-1   | butan-2-one O,O',O''-vinylsilylhydrazide                                                                                                                                 | 133 | 12      | 2.9E-02  | 9.5E-07  | 1.5E-01 | 1.40    | 3.5E-06 | 3.5E-07 | 3.5E-07 | conf    | 5.9E-01 | 1.3E-08  | 2.98E-01 | -2.96  | -9.17  | -10.33 | -4.09 | 1.0%   | 0.0% | 0.3E-45 |         |
| 1642 | 86-84-0     | 1-naphthyl isocyanate                                                                                                                                                    | 169 | 42      | 1.3E-06  | 1.7E-02  | 5.9E-01 | 1.40    | 3.5E-06 | 1.1E-06 | 3.5E-07 | conf    | 9.2E-01 | 1.3E-08  | 4.71E-01 | -9.33  | -9.12  | -10.45 | -1.90 | 0.8%   | 0.0% | 1.2E-34 |         |
| 1643 | 254673-04-8 | 2-chloro-2-[3,2,2-trifluoroethoxy]pyridine                                                                                                                               | 192 | 51      | 2.3E-02  | 2.3E-02  | 2.3E-01 | 1.40    | 3.5E-06 | 1.1E-06 | 3.5E-07 | conf    | 9.2E-01 | 1.3E-08  | 4.71E-01 | -9.38  | -9.74  | -11.27 | -1.78 | 0.3%   | 0.0% | 3.6E-42 |         |
| 1644 | 328-99-4    | 3-trifluoromethylpropanol/fluoride                                                                                                                                       | 192 | 5       | 1.5E-02  | 5.6E-02  | 2.1E-01 | 1.40    | 3.5E-06 | 1.1E-07 | 6.6E-09 | conf    | 9.1E-01 | 1.3E-08  | 4.5E-01  | -9.34  | -8.96  | -10.48 | -1.43 | 1.1%   | 0.0% | 1.4E-33 |         |
| 1645 | 58650-75-4  | 610-555-6                                                                                                                                                                | 222 | 62      | 3.4E-02  | 2.1E-01  | 1.2E-01 | 1.40    | 3.5E-06 | 1.1E-06 | 1.1E-06 | conf    | 9.2E-01 | 1.3E-08  | 4.71E-01 | -9.97  | -9.79  | -11.04 | -1.01 | 0.2%   | 0.0% | 8.6E-31 |         |
| 1646 | 118-83-2    | 5-chloro-2,4,6-trifluoro-2-nitrobenzene                                                                                                                                  | 232 | 52      | 7.9E-06  | 2.1E-02  | 2.1E-01 | 1.40    | 3.5E-06 | 1.1E-06 | 1.1E-07 | conf    | 9.2E-01 | 1.3E-08  | 4.71E-01 | -9.76  | -9.55  | -10.80 | -1.11 | 0.1%   | 0.0% | 1.0E-35 |         |
| 1647 | 17507-88-1  | 801-014-7                                                                                                                                                                | 206 | 45      | 5.0E-01  | 1.1E-01  | 1.3E-01 | 1.40    | 3.5E-06 | 1.1E-06 | 1.1E-06 | conf    | 7.9E-01 | 1.1E-08  | 3.9E-01  | -9.96  | -9.75  | -10.87 | -3.02 | 0.7%   | 0.0% | 1.8E-29 |         |
| 1648 | 14624-02-1  | potassium 4-isopropylbenzenesulphonate                                                                                                                                   | 238 | 87      | 9.9E-03  | 1.6E-03  | 3.0E-01 | 1.40    | 3.5E-06 | 1.3E-07 | 6.6E-09 | conf    | 7.6E-01 | 1.1E-08  | 3.76E-01 | -7.14  | -7.45  | -11.40 | -0.50 | 0.7%   | 0.0% | 5.4E-35 |         |
| 1649 | 66742-57-2  | 613-982-6                                                                                                                                                                | 238 | 99      | 9.0E-03  | 2.0E-01  | 5.0E-01 | 1.40    | 3.5E-06 | 1.1E-06 | 3.5E-07 | conf    | 9.2E-01 | 1.3E-08  | 4.71E-01 | -8.02  | -8.82  | -10.42 | -1.84 | 1.0%   | 0.0% | 1.0E-23 |         |
| 1650 | 6485-40-1   | 1-p-methyl-2,6,8-diene-2-one                                                                                                                                             | 130 | 10      | 1.7E-01  | 1.2E-01  | 2.2E-01 | 1.40    | 3.5E-07 | 1.6E-09 | 1.6E-09 | conf    | 8.2E-01 | 1.1E-08  | 4.11E-01 | -8.72  | -8.41  | -9.73  | -1.22 | 0.6%   | 0.0% | 2.3E-34 |         |
| 1651 | 18189-57-8  | trichlorodibutylsilane                                                                                                                                                   | 192 | 51      | 7.3E-02  | 4.8E-01  | 2.6E-01 | 1.40    | 3.5E-06 | 3.5E-06 | 3.5E-06 | conf    | 9.3E-01 | 1.3E-08  | 4.9E-01  | -10.43 | -10.19 | -11.55 | -0.84 | 0.6%   | 0.0% | 4.8E-40 |         |
| 1652 | 39489-75-3  | bis(2,4-dichloro-5-nitrophenyl) carbonate                                                                                                                                | 442 | 220     | 1.2E-08  | 1.4E-02  | 2.6E-01 | 1.40    | 3.5E-06 | 3.5E-07 | 3.5E-08 | conf    | 7.1E-01 | 9.9E-01  | 3.58E-07 | -7.77  | -8.46  | -9.90  | -0.97 | 0.8%   | 0.0% | 1.1E-37 |         |
| 1653 | 96-45-7     | imidazolidine-2-thione                                                                                                                                                   | 120 | 7       | 1.7E-01  | 3.2E-01  | 2.0     | 3.5E-06 | 3.5E-06 | 3.5E-06 | 3.5E-06 | conf    | 6.0E-01 | 8.1E-01  | 2.96E-01 | -7.42  | -8.42  | -10.21 | -1.22 | 0.1%   | 0.0% | 4.6E-32 |         |
| 1654 | 719-80-2    | ethyl diphenylphosphinite                                                                                                                                                | 230 | 69      | 2.7E-02  | 3.6E-06  | 4.0E-01 | 1.40    | 3.5E-06 | 1.1E-06 | 3.5E-07 | conf    | 9.2E-01 | 1.3E-08  | 4.71E-01 | -9.32  | -9.10  | -10.47 | -2.63 | 0.3%   | 0.0% | 2.1E-29 |         |
| 1655 | 142-62-1    | hexanoic acid                                                                                                                                                            | 116 | 26      | 3.7E-01  | 1.2E-04  | 1.1E-01 | 4.9     | 3.5E-06 | 4.0E-06 | 1.1E-06 | conf    | 1.0E-02 | 1.4E-08  | 5.33E-01 | -8.85  | -9.27  | -10.91 | -0.95 | 0.3%   | 0.0% | 2.8E-46 |         |
| 1656 | 3033-61-3   | N,N,N',N'-tetramethyl-2,2'-oxybis(ethylamine)                                                                                                                            | 132 | 105     | 2.1E-02  | 2.6E-02  | 2.6E-01 | 1.40    | 3.5E-06 | 1.1E-06 | 1.1E-06 | conf    | 9.2E-01 | 1.3E-08  | 4.71E-01 | -9.32  | -9.10  | -10.47 | -2.63 | 0.3%   | 0.0% | 1.5E-37 |         |
| 1657 | 96-23-5     | 1,3-dichloropropan-2-ol                                                                                                                                                  | 129 | -24     | 4.1E-01  | 3.9E-04  | 3.0E-01 | 13.1    | 3.5E-06 | 4.6E-07 | 1.1E-07 | conf    | 9.0E-01 | 1.3E-08  | 4.6E-01  | -8.32  | -8.06  | -8.92  | -0.27 | 0.3%   | 0.0% | 1.2E-42 |         |
| 1658 | 342-25-1    | 2,4-difluorobenzophenone                                                                                                                                                 | 75  | 1.3E-07 | 1.7E-01  | 6.0E-01  | 1.40    | 3.5E-06 | 1.1E-06 | 1.1E-07 | 1.1E-07 | conf    | 9.2E-01 | 1.3E-08  | 4.71E-01 | -9.26  | -9.07  | -10.43 | -1.17 | 0.1%   | 0.0% | 2.3E-32 |         |
| 1659 | 6246-46-6   | (2E,3E)-3,3'-dimethyl-2,6'-dien-1-amine                                                                                                                                  | 168 | 133     | 1.8E-01  | 8.2E-01  | 3.1E-01 | 1.7     | 3.5E-06 | 1.1E-06 | 1.1E-06 | conf    | 9.2E-01 | 1.3E-08  | 4.71E-01 | -8.70  | -8.93  | -10.25 | -0.94 | 0.6%   | 0.0% | 9.0E-36 |         |
| 1660 | 138-59-0    | (3R,4S,9R,3,4,5-trimethoxythiophen-4-yl)-1-ene-carboxylic acid                                                                                                           | 174 | 133     | 6.7E-07  | 9.9E-04  | 4.6E-02 | 4.1     | 3.5E-06 | 5.9E-07 | 1.1E-06 | conf    | 9.2E-01 | 1.3E-08  | 4.71E-01 | -8.83  | -8.10  | -9.94  | -1.07 | 0.7%   | 0.0% | 4.5E-37 |         |
| 1661 | 55974-25-9  | 7-methoxy-4,4'-dimethyl-2,2'-bis(phenoxymethyl)-3,3'-biphenyl-4,4'-diol                                                                                                  | 129 | 27      | 2.2E-02  | 2.2E-02  | 2.2E-01 | 1.40    | 3.5E-06 | 1.1E-06 | 1.1E-06 | conf    | 9.2E-01 | 1.3E-08  | 4.71E-01 | -8.83  | -8.10  | -9.94  | -1.07 | 0.7%   | 0.0% | 4.5E-37 |         |
| 1662 | 166E-20-4   | 4-azetidinophenol                                                                                                                                                        | 129 | 27      | 1.8E-01  | 2.3E-05  | 1.3E-01 | -1.0    | 3.5E-06 | 1.1E-06 | 1.1E-06 | conf    | 9.0E-01 | 1.3E-08  | 4.5E-01  | -7.22  | -8.46  | -10.30 | -0.41 | 0.9%   | 0.0% | 0.3E-35 |         |
| 1663 | 129-00-0    | pyrene                                                                                                                                                                   | 202 | 120     | 4.6E-05  | 2.8E-02  | 8.5E-01 | 1.40    | 3.5E-06 | 2.2E-09 | 1.1E-08 | conf    | 5.8E-01 | 8.1E-01  | 2.8E-01  | -8.11  | -7.88  | -8.83  | -4.05 | 0.7%   | 0.0% | 4.1E-32 |         |
| 1664 | 75-59-3     | triethylaluminum hydroxide                                                                                                                                               | 91  | 87      | 1.9E-01  | 6.8E-02  | 3.1E-01 | 1.40    | 3.5E-06 | 1.1E-06 | 1.1E-06 | conf    | 7.4E-01 | 1.0E-08  | 3.79E-01 | -7.14  | -7.46  | -9.12  | -1.84 | 0.6%   | 0.0% | 2.1E-45 |         |
| 1665 | 349-76-8    | 3-trifluoromethylacetophenone                                                                                                                                            | 188 | 6       | 5.1E-01  | 5.0E-02  | 4.4E-01 | 1.40    | 3.5E-06 | 1.1E-06 | 3.5E-07 | conf    | 9.2E-01 | 1.3E-08  | 4.71E-01 | -8.88  | -9.95  | -10.97 | -2.47 | 1.0%   | 0.0% | 3.7E-34 |         |
| 1666 | 107-20-0    | chloroacetaldehyde                                                                                                                                                       | 78  | -72     | 9.2E-03  | 5.7E-04  | 1.2E-01 | 1.40    | 3.5E-06 | 8.1E-07 | 3.5E-07 | conf    | 9.2E-01 | 1.3E-08  | 4.71E-01 | -9.66  | -9.35  | -10.81 | -0.30 | 0.0%   | 0.0% | 1.8E-33 |         |
| 1667 | 36888-90-9  | 5,5'-(1,1'-bis(isopropylidene-1,3,2(1H)-dithienylidene)bis(4-oxo-1,3,5-triazine-2,4,6-trisubstituted-5-ylidene))bis(4-oxo-1,3,5-triazine-2,4,6-trisubstituted-5-ylidene) | 144 | -3      | 4.4E-02  | 1.2E-01  | 2.2E-01 | 1.40    | 3.5E-06 | 3.8E-06 | 1.1E-06 | conf    | 9.0E-01 | 1.3E-08  | 4.9E-01  | -10.05 | -9.88  | -11.04 | -1.96 | 0.3%   | 0.0% | 8.4E-39 |         |
| 1668 | 5283-66-9   | octachlorobenzene                                                                                                                                                        | 132 | 132     | 8.8E-04  | 2.8E-04  | 2.8E-01 | 1.40    | 3.5E-06 | 1.1E-06 | 1.1E-06 | conf    | 9.2E-01 | 1.3E-08  | 4.71E-01 | -9.32  | -9.10  | -10.47 | -2.63 | 0.3%   | 0.0% | 7.1E-48 |         |
| 1669 | 447-61-0    | o-trifluoromethylbenzaldehyde                                                                                                                                            | 170 | 4       | 9.0E-01  | 9.1E-02  | 4.7E-01 | 1.40    | 3.5E-06 | 1.1E-06 | 1.1E-06 | conf    | 9.2E-01 | 1.3E-08  | 4.71E-01 | -9.93  | -9.69  | -10.95 | -2.33 | 0.7%   | 0.0% | 3.6E-35 |         |
| 1670 | 81-61-61    | o-trifluorodibenzoylacetone                                                                                                                                              | 240 | 181     | 9.5E-08  | 1.1E-01  | 8.7E-01 | 1.0     | 3.5E-06 | 3.5E-06 | 1.1E-06 | conf    | 9.2E-01 | 1.3E-08  | 4.71E-01 | -8.21  | -8.47  | -10.83 | -1.35 | 0.2%   | 0.0% | 6.0E-27 |         |
| 1671 | 760108-96-1 | 614-280-8                                                                                                                                                                | 87  | 1.9E-03 | 2.8E-01  | 3.1E-01  | 1.40    | 3.5E-06 | 1.3E-07 | 6.6E-09 | conf    | 7.4E-01 | 1.0E-08 | 3.79E-01 | -7.14    | -7.46  | -9.12  | -1.84  | 0.6%  | 0.0%</ |      |         |         |

|      |             |                                                                                                                |     |      |          |          |          |      |          |          |          |      |      |          |          |          |        |        |        |       |      |      |      |          |
|------|-------------|----------------------------------------------------------------------------------------------------------------|-----|------|----------|----------|----------|------|----------|----------|----------|------|------|----------|----------|----------|--------|--------|--------|-------|------|------|------|----------|
| 1806 | 265136.650  | 4-ethyl-3-oxo-4-oxo-1,2-epithalimidethoxyprotonate                                                             | 318 | 223  | 7.95E-09 | 2.21E-03 | 1.42E-10 | 1.40 | 3.56E-06 | 1.11E-06 | 3.56E-07 | conf | conf | 9.24E-01 | 1.38E+00 | 4.70E-01 | -7.07  | -8.22  | -10.24 | -2.25 | 0.64 | 0.0% | 0.0% | 1.79E-30 |
| 1807 | 92400.107   | 689-084-1                                                                                                      | 318 | 223  | 7.95E-09 | 2.21E-03 | 1.42E-10 | 1.40 | 3.56E-06 | 1.11E-06 | 3.56E-07 | conf | conf | 9.24E-01 | 1.38E+00 | 4.70E-01 | -7.07  | -8.22  | -10.24 | -2.25 | 0.64 | 0.0% | 0.0% | 4.4E-44  |
| 1808 | 98210.99-2  | 619-326-5                                                                                                      | 545 | 350  | 6.22E-23 | 4.43E-02 | 6.86E-02 | 1.40 | 3.56E-06 | 1.11E-06 | 3.56E-08 | conf | conf | 9.24E-01 | 1.38E+00 | 4.70E-01 | -6.81  | -7.96  | -11.07 | -1.22 | 0.64 | 0.0% | 0.0% | 9.76E-39 |
| 1809 | 13947.571   | 1-3,6-bis(2-aminopropyl)amino-4,13-dichloro-4,14-benzoxazino[2,3-b]phenoxazine-4,11-disulfonic acid            | 660 | 350  | 1.52E-25 | 4.86E-04 | 6.38E-02 | 1.40 | 3.56E-06 | 1.38E-07 | 6.68E-08 | conf | conf | 9.24E-01 | 1.38E+00 | 4.66E-01 | -6.32  | -7.30  | -8.96  | -2.25 | 0.64 | 0.0% | 0.0% | 4.8E-22  |
| 1810 | 1641512.4   | hexamethylenediamine                                                                                           | 140 | 174  | 2.18E-03 | 1.48E-06 | 1.40E-06 | 1.40 | 3.56E-06 | 1.11E-06 | 3.56E-07 | conf | conf | 9.24E-01 | 1.38E+00 | 4.70E-01 | -7.07  | -8.22  | -10.24 | -2.25 | 0.64 | 0.0% | 0.0% | 1.79E-30 |
| 1811 | 7529.160    | 616-206-4                                                                                                      | 111 | 63   | 7.26E-07 | 7.71E-04 | 2.86E-10 | 1.40 | 3.56E-06 | 1.11E-06 | 3.56E-07 | conf | conf | 9.24E-01 | 1.38E+00 | 4.70E-01 | -7.17  | -8.26  | -10.28 | -1.72 | 1.32 | 0.0% | 0.0% | 9.93E-35 |
| 1812 | 51-34-3     |                                                                                                                | 303 | 151  | 2.68E-07 | 7.55E-03 | 2.53E-10 | 1.40 | 3.56E-06 | 1.11E-06 | 3.56E-07 | conf | conf | 9.24E-01 | 1.38E+00 | 4.70E-01 | -7.03  | -8.18  | -10.24 | -1.36 | 0.58 | 0.0% | 0.0% | 3.5E-37  |
| 1813 | 88-13-3     | 3-aminio-5-chloro-2-hydroxybenzenesulfonic acid                                                                | 174 | 174  | 2.18E-07 | 5.66E-03 | 1.12E-02 | 1.40 | 3.56E-06 | 1.11E-06 | 3.56E-07 | conf | conf | 9.24E-01 | 1.38E+00 | 4.70E-01 | -7.07  | -8.22  | -10.24 | -1.36 | 0.58 | 0.0% | 0.0% | 3.5E-37  |
| 1814 | 90-20-0     | 4-amino-4-hydroxyphenylthalein-2,7-disulfonic acid                                                             | 193 | 261  | 9.96E-15 | 6.58E-04 | 2.70E-08 | 1.40 | 3.56E-06 | 1.11E-06 | 1.11E-06 | conf | conf | 9.24E-01 | 1.38E+00 | 4.70E-01 | -7.00  | -8.37  | -10.27 | -1.77 | 1.15 | 0.0% | 0.0% | 8.84E-40 |
| 1815 | 2964-69-1   |                                                                                                                | 120 | 195  | 6.06E-06 | 5.48E-02 | 2.09E-10 | 1.40 | 3.56E-06 | 1.11E-06 | 3.56E-07 | conf | conf | 9.24E-01 | 1.38E+00 | 4.70E-01 | -7.07  | -8.22  | -10.24 | -1.36 | 0.58 | 0.0% | 0.0% | 3.4E-32  |
| 1816 | 172529.93-0 | 605-637-3                                                                                                      | 328 | 201  | 2.08E-07 | 1.38E-04 | 4.07E-10 | 1.29 | 3.56E-06 | 1.11E-06 | 3.56E-07 | conf | conf | 9.24E-01 | 1.38E+00 | 4.70E-01 | -7.12  | -8.21  | -10.28 | -0.84 | 0.59 | 0.0% | 0.0% | 9.04E-42 |
| 1817 | 11702.02-1  | ethylmethanamine-N,N-bis(hydroxyphenylacetate)                                                                 | 360 | 324  | 1.23E-14 | 5.46E-01 | 3.31E-01 | 9.2  | 3.56E-06 | 1.11E-06 | 3.56E-07 | conf | conf | 9.24E-01 | 1.38E+00 | 4.70E-01 | -6.88  | -8.03  | -10.19 | -1.85 | 0.58 | 0.0% | 0.0% | 4.38E-33 |
| 1818 | 25157.464   | 607-978-9                                                                                                      | 350 | 296  | 1.96E-09 | 1.08E-06 | 1.08E-06 | 1.40 | 3.56E-06 | 1.11E-06 | 3.56E-07 | conf | conf | 9.24E-01 | 1.38E+00 | 4.70E-01 | -6.86  | -8.08  | -10.19 | -1.85 | 0.58 | 0.0% | 0.0% | 2.9E-24  |
| 1819 | 1194.65     | dichloromethane (reac)                                                                                         | 172 | 53   | 7.88E-02 | 6.38E-01 | 6.38E-01 | 1.40 | 3.56E-06 | 1.11E-06 | 3.56E-08 | conf | conf | 9.24E-01 | 1.38E+00 | 4.70E-01 | -7.91  | -7.63  | -8.65  | -2.03 | 0.58 | 0.0% | 0.0% | 1.54E-21 |
| 1820 | 4684.28-0   | 1705 (1a,2b,4b,5b,7b)-3-oxo-9-azastrioxo[3,1,1,0,2]apron-7-yl hydrogen sulphate                                | 289 | 158  | 5.76E-07 | 4.79E-03 | 1.55E-10 | 1.40 | 3.56E-06 | 1.11E-06 | 3.56E-07 | conf | conf | 9.24E-01 | 1.38E+00 | 4.70E-01 | -7.02  | -8.16  | -10.24 | -1.36 | 1.00 | 0.0% | 0.0% | 6.26E-38 |
| 1821 | 18063.61-1  | 3,4-diaminobenzenesulfonic acid                                                                                | 181 | 161  | 6.66E-07 | 5.29E-04 | 7.00E-03 | 1.40 | 3.56E-06 | 1.11E-06 | 1.11E-06 | conf | conf | 9.24E-01 | 1.38E+00 | 4.70E-01 | -7.00  | -8.13  | -10.23 | -1.71 | 0.93 | 0.0% | 0.0% | 6.64E-40 |
| 1822 | 12315.20-6  | 2-(2-[3-(3-aminobenzyl)amino]ethylsulfonyl)ethyl hydrazine                                                     | 252 | 265  | 2.05E-14 | 3.18E-03 | 3.85E-10 | 1.40 | 3.56E-06 | 1.11E-06 | 1.11E-06 | conf | conf | 9.24E-01 | 1.38E+00 | 4.70E-01 | -6.99  | -8.15  | -10.23 | -1.11 | 1.10 | 0.0% | 0.0% | 4.53E-39 |
| 1823 | 6860.97-5   | 4-hydroxy-5-[10-(3-hydroxyphenyl)amino]phenylthalein-2,7-disulfonic acid                                       | 174 | 234  | 6.06E-06 | 5.48E-02 | 2.09E-10 | 1.40 | 3.56E-06 | 1.11E-06 | 3.56E-07 | conf | conf | 9.24E-01 | 1.38E+00 | 4.70E-01 | -6.95  | -8.21  | -10.23 | -1.53 | 2.55 | 0.0% | 0.0% | 2.6E-39  |
| 1824 | 143382.03-0 | 5-(methoxymethyl)pyridine-2,3-dicarboxylic acid                                                                | 211 | 162  | 6.76E-05 | 4.68E-01 | 4.66E-01 | 1.40 | 3.56E-06 | 1.11E-06 | 3.56E-07 | conf | conf | 9.24E-01 | 1.38E+00 | 4.70E-01 | -7.10  | -8.17  | -10.27 | -0.51 | 0.64 | 0.0% | 0.0% | 1.6E-44  |
| 1825 | 9596.26-1   | Slane, (chloromethyl)trimethoxy-                                                                               | 171 | -27  | 3.47E-02 | 3.96E-06 | 3.86E-10 | 1.40 | 3.56E-06 | 1.11E-06 | 1.11E-06 | conf | conf | 9.24E-01 | 1.38E+00 | 4.70E-01 | -8.50  | -8.38  | -10.30 | 0.49  | 0.64 | 0.0% | 0.0% | 7.0E-54  |
| 1826 | 988.55-0    | methyl carbamate                                                                                               | 75  | 77   | 7.32E-01 | 4.56E-05 | 3.11E-01 | 1.40 | 3.56E-06 | 1.11E-06 | 1.11E-06 | conf | conf | 9.24E-01 | 1.38E+00 | 4.70E-01 | -8.46  | -8.38  | -10.27 | -0.98 | 1.27 | 0.0% | 0.0% | 1.8E-40  |
| 1827 | 132-57-0    | 7-hydroxyphenylthalein-1-sulfonic acid                                                                         | 224 | 173  | 1.1E-07  | 4.02E-03 | 3.40E-01 | 1.40 | 3.56E-06 | 1.38E-07 | 6.68E-08 | conf | conf | 9.24E-01 | 1.38E+00 | 4.66E-01 | -6.33  | -7.31  | -8.96  | -1.14 | 0.31 | 0.0% | 0.0% | 2.6E-29  |
| 1828 | 3977.63-7   | 5-hydroxyphenyltramic acid                                                                                     | 117 | 187  | 2.22E-08 | 1.75E-03 | 1.66E-10 | 1.40 | 3.56E-06 | 1.11E-06 | 3.56E-07 | conf | conf | 9.24E-01 | 1.38E+00 | 4.70E-01 | -6.88  | -8.04  | -10.20 | -1.37 | 1.00 | 0.0% | 0.0% | 9.7E-37  |
| 1829 | 7474.78-4   | 3,4-diaminobenzenesulfonic acid                                                                                | 181 | 161  | 6.66E-07 | 5.29E-04 | 7.00E-03 | 1.40 | 3.56E-06 | 1.11E-06 | 1.11E-06 | conf | conf | 9.24E-01 | 1.38E+00 | 4.70E-01 | -7.00  | -8.13  | -10.23 | -1.71 | 0.93 | 0.0% | 0.0% | 2.1E-39  |
| 1830 | 74124.79-1  | dimethyl(diphenyl)carbamate                                                                                    | 256 | 240  | 5.93E-10 | 1.00E-06 | 1.70E-10 | 1.40 | 3.56E-06 | 1.11E-06 | 1.11E-06 | conf | conf | 9.24E-01 | 1.38E+00 | 4.70E-01 | -6.99  | -8.15  | -10.23 | -1.13 | 1.84 | 0.0% | 0.0% | 6.26E-39 |
| 1831 | 9246.63-6   | dimethyl(diphenyl)carbamate                                                                                    | 87  | 82   | 2.12E-04 | 1.44E-05 | 1.05E-01 | 1.01 | 3.56E-06 | 1.11E-06 | 1.11E-06 | conf | conf | 9.24E-01 | 1.38E+00 | 4.68E-01 | -7.17  | -8.98  | -11.30 | -1.58 | 0.61 | 0.0% | 0.0% | 4.2E-44  |
| 1832 | 4090.51-1   | 2,2'-oxybis(5-dimethyl-1,3,2-dioxaphosphorinane) 2,2'-disulphide                                               | 346 | -20  | 3.66E-05 | 5.50E-04 | 3.38E-04 | 1.40 | 3.56E-06 | 3.56E-07 | 3.56E-07 | conf | conf | 7.84E-01 | 1.06E+00 | 3.76E-01 | -6.84  | -8.48  | -10.03 | -3.60 | 0.87 | 0.0% | 0.0% | 2.1E-20  |
| 1833 | 63589.25-3  | 4-diazo-3,4-dihydro-7-nitro-3-oxaphenylthalein-1-sulfonic acid                                                 | 295 | 300  | 3.00E-17 | 7.23E-01 | 5.11E-01 | 1.8  | 3.56E-06 | 1.11E-06 | 3.56E-07 | conf | conf | 9.64E-01 | 1.38E+00 | 4.98E-01 | -7.35  | -8.70  | -10.78 | -0.60 | 0.64 | 0.0% | 0.0% | 3.3E-48  |
| 1834 | 89-58-7     | 2-nitro-o-xylene                                                                                               | 151 | 53   | 6.02E-00 | 1.29E-02 | 8.11E-02 | 1.40 | 3.56E-06 | 1.38E-07 | 6.68E-09 | conf | conf | 9.31E-01 | 1.38E+00 | 4.54E-01 | -9.01  | -8.70  | -10.08 | -1.83 | 0.45 | 0.0% | 0.0% | 2.2E-32  |
| 1835 | 20193.20-8  | N-ethylpropanamine                                                                                             | 87  | 47   | 1.11E-04 | 1.18E-05 | 2.00E-01 | 1.09 | 3.56E-06 | 1.11E-06 | 1.11E-06 | conf | conf | 9.64E-01 | 1.38E+00 | 4.98E-01 | -10.33 | -10.23 | -11.52 | -0.80 | 0.92 | 0.0% | 0.0% | 2.9E-53  |
| 1836 | 15793.71-4  | 4,4'-(1,3'-bis(4'-chloro-1,1'-biphenyl)-4,4'-diyl)bis[2-oxo-4,4-dihydro-5-methyl-2-(p-tolyl)-3H-pyrazol-3-one] | 350 | 632  | 3.79E-03 | 3.12E-05 | 1.86E-01 | 0.7  | 3.56E-06 | 3.56E-07 | 3.56E-07 | conf | conf | 8.80E-01 | 1.11E+00 | 4.00E-01 | -9.97  | -9.97  | -10.41 | 0.49  | 0.57 | 0.0% | 0.0% | 3.5E-09  |
| 1837 | 89-87-2     | 4-nitro-o-xylene                                                                                               | 151 | 53   | 4.38E-00 | 1.29E-02 | 8.11E-02 | 1.40 | 3.56E-06 | 1.11E-06 | 1.11E-06 | conf | conf | 9.24E-01 | 1.38E+00 | 4.70E-01 | -9.83  | -9.90  | -11.00 | -1.87 | 0.46 | 0.0% | 0.0% | 3.8E-39  |
| 1838 | 107-98-4    | 3-chlorophenol                                                                                                 | 222 | 2    | 2.68E-02 | 1.25E-05 | 6.88E-10 | 1.40 | 3.56E-06 | 1.11E-06 | 1.11E-06 | conf | conf | 9.24E-01 | 1.38E+00 | 4.98E-01 | -9.75  | -9.16  | -10.89 | -0.80 | 0.65 | 0.0% | 0.0% | 1.8E-46  |
| 1839 | 93-12-5     | quinoline                                                                                                      | 98  | 19   | 3.22E-03 | 3.54E-02 | 3.48E-02 | 1.40 | 3.56E-06 | 1.11E-06 | 1.11E-06 | conf | conf | 9.24E-01 | 1.38E+00 | 4.98E-01 | -9.75  | -9.16  | -10.89 | -0.80 | 0.65 | 0.0% | 0.0% | 1.8E-46  |
| 1840 | 122731.59-3 | 602-891-7                                                                                                      | 716 | 295  | 9.71E-14 | 3.17E-02 | 3.86E-02 | 1.7  | 3.56E-06 | 1.11E-06 | 1.11E-06 | conf | conf | 9.06E-01 | 1.38E+00 | 4.66E-01 | -7.69  | -8.56  | -10.38 | -1.34 | 0.14 | 0.0% | 0.0% | 1.7E-37  |
| 1841 | 234-88-9    | dicaproyl succinate                                                                                            | 202 | -71  | 4.11E-01 | 2.46E-03 | 1.77E-10 | 1.40 | 3.56E-06 | 1.11E-06 | 1.11E-06 | conf | conf | 9.36E-01 | 1.38E+00 | 4.88E-01 | -9.92  | -9.76  | -11.00 | -1.08 | 0.88 | 0.0% | 0.0% | 9.4E-41  |
| 1842 | 111-70-6    | heptan-1-ol                                                                                                    | 116 | -116 | 1.15E-01 | 2.04E-02 | 2.14E-02 | 1.40 | 3.56E-06 | 1.11E-06 | 1.11E-06 | conf | conf | 9.36E-01 | 1.38E+00 | 4.70E-01 | -9.80  | -10.19 | -10.98 | -0.93 | 0.86 | 0.0% | 0.0% | 6.6E-40  |
| 1843 | 66-25-1     | hexanal                                                                                                        | 100 | -55  | 1.38E-03 | 5.26E-03 | 6.38E-01 | 1.40 | 3.56E-06 | 1.11E-06 | 1.11E-06 | conf | conf | 9.24E-01 | 1.38E+00 | 4.70E-01 | -10.35 | -10.16 | -11.49 | -1.76 | 0.75 | 0.0% | 0.0% | 2.8E-44  |
| 1844 | 454-21-9    | ethyl difluoroacetate                                                                                          | 126 | 92   | 1.62E-02 | 2.56E-03 | 2.56E-03 | 1.40 | 3.56E-06 | 1.11E-06 | 1.11E-06 | conf | conf | 9.24E-01 | 1.38E+00 | 4.70E-01 | -10.35 | -10.16 | -11.49 | -1.76 | 0.75 | 0.0% | 0.0% | 2.8E-44  |
| 1845 | 63986.64-9  | (3R,5S,8R,8S,9R,12S,12aR)-3,6,9-trimethylcyathro[9,12-c]epoxyoxa[4,3]b[1,2]benzodioxino[10H]-one               | 282 | 133  | 2.98E-05 | 1.54E-02 | 7.11E-10 | 1.40 | 3.56E-06 | 1.11E-06 | 1.11E-06 | conf | conf | 9.24E-01 | 1.38E+00 | 4.70E-01 | -8.54  | -9.41  | -10.90 | -1.25 | 1.12 | 0.0% | 0.0% | 4.1E-36  |
| 1846 | 3167.75-9   | 2-(2-benzoxazolin-2-yl)-4-(1,1,3,3-tetramethylbutyl)phenol                                                     | 523 | 191  | 1.55E-07 | 3.15E-01 | 1.64E-10 | 1.40 | 3.56E-06 | 1.11E-06 | 1.11E-06 | conf | conf | 8.06E-01 | 1.11E+00 | 4.15E-01 | -7.47  | -7.88  | -9.69  | -3.88 | 0.36 | 0.0% | 0.0% | 5.4E-17  |
| 1847 | 535-13-7    | ethyl 3-chloropropionate                                                                                       | 137 | 181  | 1.11E-01 | 5.08E-03 | 5.08E-03 | 1.40 | 3.56E-06 | 1.11E-06 | 1.11E-06 | conf | conf | 8.84E-01 | 1.11E+00 | 4.15E-01 | -7.40  | -7.88  | -9.69  | -3.88 | 0.36 | 0.0% | 0.0% | 5.4E-17  |
| 1848 | 4233.03-4   | N-1,1,3,3-tetramethylbutylacrylamide                                                                           | 188 | 84   | 8.88E-02 | 2.74E-02 | 7.40E-02 | 0.4  | 3.56E-06 | 1.11E-06 | 1.11E-06 | conf | conf | 8.84E-01 | 1.11E+00 | 4.15E-01 | -7.40  | -7.88  | -9.69  | -3.88 | 0.36 | 0.0% | 0.0% | 1.7E-38  |
| 1849 | 563.80-4    | 3-methylbutanoate                                                                                              | 68  | -79  | 7.97E-03 | 2.23E-04 | 4.70E-10 | 1.40 | 3.56E-06 | 1.11E-06 | 1.11E-06 | conf | conf | 8.84E-01 | 1.11E+00 | 4.15E-01 | -8.86  | -9.59  | -11.07 | -0.84 | 0.34 | 0.0% | 0.0% | 9.8E-49  |
| 1850 | 62-56-4     | thiourea                                                                                                       | 79  | 26   | 1.88E-02 | 1.08E-06 | 2.98E-02 | 1.40 | 3.56E-06 | 1.11E-06 | 1.11E-06 | conf | conf | 9.24E-01 | 1.38E+00 |          |        |        |        |       |      |      |      |          |

|      |             |                                                                                                                                                    |     |      |         |          |          |         |         |         |         |      |      |         |         |          |        |        |        |       |      |      |      |         |
|------|-------------|----------------------------------------------------------------------------------------------------------------------------------------------------|-----|------|---------|----------|----------|---------|---------|---------|---------|------|------|---------|---------|----------|--------|--------|--------|-------|------|------|------|---------|
| 1989 | 10109-952   | 2,5-diaminoterephthalic acid                                                                                                                       | 348 | 242  | 4.0E-10 | 1.12E-02 | 3.04E-04 | 0.5     | 3.5E-06 | 1.1E-16 | 1.1E-16 | conf | conf | 7.4E-01 | 1.0E-00 | 3.78E-01 | -7.87  | 8.70   | -10.40 | -2.95 | 0.65 | 0.0% | 0.0% | 9.9E-27 |
| 1990 | 54-117      | sodium salicylate                                                                                                                                  | 87  | 9    | 9.1E-03 | 3.1E-02  | 1.0E-02  | 3.5E-06 | 1.1E-07 | 6.6E-09 | 6.6E-09 | conf | conf | 5.1E-01 | 3.1E-01 | 2.1E-01  | -8.94  | -1.13  | -7.51  | -0.23 | 0.13 | 0.0% | 0.0% | 4.5E-41 |
| 1991 | 12286-667   | calcium bis[1-[(1-[(2-methylphenyl)amino]carbonyl)-2-oxopropyl]azo]-3-nitrobenzenesulphonate                                                       | 879 | 87   | 9.9E-03 | 6.1E-03  | 3.0E-02  | 1.40    | 3.5E-06 | 1.1E-07 | 6.6E-09 | conf | conf | 5.8E-01 | 8.0E-01 | 2.9E-01  | -7.24  | -7.57  | -9.23  | -2.31 | 1.39 | 0.0% | 0.0% | 2.5E-23 |
| 1992 | 29857-134   | sodium 4,10-dioxido-1-sulphonatophosphate                                                                                                          | 500 | 87   | 9.9E-03 | 3.5E-03  | 3.0E-02  | 1.40    | 3.5E-06 | 1.3E-07 | 6.6E-09 | conf | conf | 5.7E-01 | 8.0E-01 | 2.9E-01  | -7.25  | -7.57  | -9.23  | -2.34 | 0.83 | 0.0% | 0.0% | 3.5E-23 |
| 1993 | 87-745      | tetramethylammonium sulphate                                                                                                                       | 150 | 87   | 9.9E-03 | 1.6E-02  | 3.0E-02  | 1.40    | 3.5E-06 | 1.1E-07 | 6.6E-09 | conf | conf | 4.4E-01 | 5.7E-01 | 2.1E-01  | -8.94  | -1.13  | -7.51  | -0.23 | 0.80 | 0.0% | 0.0% | 1.8E-17 |
| 1994 | 104-55-2    | cinnaledic acid                                                                                                                                    | 132 | 0    | 4.5E-00 | 3.0E-02  | 6.6E-01  | 1.40    | 3.5E-06 | 1.2E-16 | 1.1E-16 | conf | conf | 7.3E-01 | 1.0E-00 | 3.8E-01  | -9.44  | -9.24  | -10.54 | -1.90 | 0.84 | 0.0% | 0.0% | 2.9E-35 |
| 1995 | 88-517      | 4-amino-6-chlorotoluene-3-sulphonic acid                                                                                                           | 222 | 150  | 2.1E-06 | 1.1E-03  | 1.3E-01  | 1.2     | 3.5E-06 | 1.1E-16 | 1.1E-16 | conf | conf | 7.4E-01 | 1.0E-00 | 3.8E-01  | -7.16  | -8.52  | -10.38 | 0.39  | 0.40 | 0.0% | 0.0% | 1.1E-53 |
| 1996 | 80-46-4     | p-1,1-dimethylpropylamine                                                                                                                          | 148 | 48   | 1.1E-01 | 7.1E-01  | 8.1E-03  | 10.0    | 3.5E-06 | 1.1E-16 | 1.1E-16 | conf | conf | 4.4E-01 | 4.2E-01 | 2.1E-01  | -8.94  | -1.13  | -7.51  | -0.23 | 0.78 | 0.0% | 0.0% | 3.1E-21 |
| 1997 | 563-780     | 2,3-dimethylbut-1-ene                                                                                                                              | 84  | -116 | 3.3E-04 | 2.5E-02  | 1.1E-03  | 1.40    | 3.5E-06 | 1.1E-16 | 1.1E-16 | conf | conf | 5.2E-01 | 7.2E-01 | 2.5E-01  | -10.25 | -10.83 | -10.40 | -2.05 | 0.15 | 0.0% | 0.0% | 2.2E-59 |
| 1998 | 131-17-9    | diethylamine                                                                                                                                       | 146 | 10   | 1.5E-01 | 9.3E-01  | 2.1E-01  | 1.40    | 3.5E-06 | 1.1E-16 | 1.1E-16 | conf | conf | 5.4E-01 | 7.4E-01 | 2.6E-01  | -9.24  | -9.73  | -10.40 | -2.34 | 0.17 | 0.0% | 0.0% | 4.1E-31 |
| 1999 | 1563-828    | sodium 2-methylprop-2-ene-1-sulphonate                                                                                                             | 158 | 87   | 9.9E-03 | 1.1E-03  | 3.0E-02  | 1.40    | 3.5E-06 | 1.3E-07 | 6.6E-09 | conf | conf | 5.7E-01 | 7.9E-01 | 2.8E-01  | -7.28  | -7.58  | -9.23  | -1.84 | 0.64 | 0.0% | 0.0% | 2.2E-26 |
| 2000 | 149-746     | dichloromethyl(phenyl)sulphate                                                                                                                     | 191 | 6    | 3.5E-01 | 3.0E-02  | 6.9E-03  | 1.40    | 3.5E-06 | 1.5E-07 | 1.1E-07 | conf | conf | 5.9E-01 | 8.2E-01 | 3.0E-01  | -8.90  | -9.54  | -10.91 | -0.99 | 0.70 | 0.0% | 0.0% | 6.6E-46 |
| 2001 | 138-82-1    | 2,2',6,6'-tetra-tert-butyl-4,4'-methylenebisphenol                                                                                                 | 485 | 168  | 1.0E-01 | 5.4E-01  | 9.1E-01  | 11.0    | 3.5E-06 | 1.1E-16 | 1.1E-16 | conf | conf | 5.6E-01 | 6.8E-01 | 2.6E-01  | -8.94  | -9.19  | -10.38 | -0.78 | 0.94 | 0.0% | 0.0% | 1.9E-14 |
| 2002 | 78-95-5     | chloroacetone                                                                                                                                      | 93  | -59  | 2.2E-03 | 3.8E-04  | 1.0E-00  | 1.40    | 3.5E-06 | 1.1E-17 | 1.1E-17 | conf | conf | 6.4E-01 | 8.9E-01 | 3.1E-01  | -9.37  | -9.05  | -10.43 | -1.64 | 0.21 | 0.0% | 0.0% | 1.4E-22 |
| 2003 | 2720-73-2   | potassium O-phenyl dicarbonate                                                                                                                     | 202 | 102  | 9.9E-03 | 1.4E-03  | 3.0E-02  | 1.40    | 3.5E-06 | 1.1E-08 | 6.6E-09 | conf | conf | 5.6E-01 | 7.8E-01 | 2.8E-01  | -7.29  | -7.59  | -9.24  | -1.82 | 0.62 | 0.0% | 0.0% | 1.7E-26 |
| 2004 | 1187-89-5   | trifluoromethylsulfonamethylethylene                                                                                                               | 166 | -133 | 4.2E-02 | 2.4E-02  | 1.0E-00  | 1.40    | 3.5E-06 | 1.1E-16 | 1.1E-16 | conf | conf | 5.3E-01 | 6.0E-01 | 2.1E-01  | -8.97  | -9.73  | -10.40 | -2.05 | 0.66 | 0.0% | 0.0% | 3.5E-40 |
| 2005 | 75-46-7     | trifluoromethylsulfonamethylethylene                                                                                                               | 70  | -171 | 2.3E-04 | 3.1E-02  | 3.0E-02  | 1.40    | 3.5E-06 | 3.5E-08 | 3.5E-08 | conf | conf | 4.3E-01 | 6.0E-01 | 2.1E-01  | -10.75 | -9.75  | -9.23  | -1.24 | 0.50 | 0.31 | 0.0% | 1.2E-65 |
| 2006 | 19347-16-1  | diphenylsulphate                                                                                                                                   | 134 | 37   | 9.1E-03 | 1.5E-03  | 3.0E-02  | 1.40    | 3.5E-06 | 1.1E-07 | 6.6E-09 | conf | conf | 5.6E-01 | 7.8E-01 | 2.8E-01  | -7.28  | -7.53  | -9.24  | -0.77 | 0.38 | 0.0% | 0.0% | 8.8E-32 |
| 2007 | 534-03-2    | 2-aminopropene-1,3-diol                                                                                                                            | 91  | 26   | 2.2E-00 | 5.6E-05  | 2.8E-02  | 8.8     | 3.5E-06 | 3.5E-06 | 3.5E-06 | conf | conf | 7.5E-01 | 1.0E-00 | 3.8E-01  | -8.19  | -9.06  | -10.93 | -0.40 | 0.83 | 0.0% | 0.0% | 6.6E-55 |
| 2008 | 21829-52-7  | carboxylic acid, compound with 2-aminoethanol (1:2)                                                                                                | 184 | 87   | 9.9E-03 | 1.3E-03  | 3.0E-02  | 1.40    | 3.5E-06 | 1.3E-07 | 6.6E-09 | conf | conf | 5.6E-01 | 7.7E-01 | 2.8E-01  | -7.29  | -7.59  | -9.24  | -1.28 | 0.59 | 0.0% | 0.0% | 3.2E-30 |
| 2009 | 4252-10-8   | (carboxymethyl)aminoethyl 3-[1-oxododecylamino]propylammonium hydroxide                                                                            | 343 | 783  | 6.4E-03 | 1.7E-02  | 4.5E-02  | 1.40    | 3.5E-06 | 1.1E-06 | 3.5E-07 | conf | conf | 7.1E-01 | 9.5E-01 | 3.6E-01  | -7.66  | -8.47  | -10.38 | -1.43 | 0.44 | 0.0% | 0.0% | 3.5E-30 |
| 2010 | 6915-15-7   | maleic acid                                                                                                                                        | 134 | 113  | 3.3E-04 | 2.4E-03  | 2.1E-02  | 3.6     | 3.5E-06 | 3.5E-06 | 1.1E-16 | conf | conf | 7.4E-01 | 1.0E-00 | 3.8E-01  | -7.61  | -9.04  | -10.92 | -0.49 | 0.25 | 0.0% | 0.0% | 1.5E-50 |
| 2011 | 76-19-9     | trichloroacetic acid                                                                                                                               | 169 | 27   | 2.6E-01 | 1.6E-02  | 2.8E-03  | 0.6     | 3.5E-06 | 5.8E-08 | 3.5E-07 | conf | conf | 5.6E-01 | 6.8E-01 | 2.6E-01  | -7.07  | -7.61  | -8.99  | -1.26 | 0.14 | 0.0% | 0.0% | 2.5E-35 |
| 2012 | 24544-04-5  | 2,6-disulphopropene                                                                                                                                | 177 | 51   | 1.5E-00 | 1.3E-01  | 3.0E-02  | 4.0     | 3.5E-06 | 6.1E-07 | 1.1E-07 | conf | conf | 4.3E-01 | 6.0E-01 | 2.1E-01  | -7.88  | -7.57  | -9.23  | -1.57 | 0.45 | 0.0% | 0.0% | 1.1E-37 |
| 2013 | 25091-09-6  | 2,4-dichloro-1,3-dinitro-5-(trifluoromethyl)benzene                                                                                                | 305 | 122  | 3.6E-03 | 1.0E-01  | 7.6E-03  | 1.40    | 3.5E-06 | 1.1E-16 | 1.1E-16 | conf | conf | 6.5E-01 | 9.1E-01 | 3.3E-01  | -9.12  | -8.91  | -10.57 | -0.35 | 0.99 | 0.0% | 0.0% | 3.2E-27 |
| 2014 | 3159-62-4   | calcium(2+)-12-hydroxyoctadecanoate                                                                                                                | 89  | 87   | 9.9E-03 | 4.4E-03  | 3.0E-02  | 1.40    | 3.5E-06 | 1.3E-07 | 6.6E-09 | conf | conf | 5.7E-01 | 7.6E-01 | 2.7E-01  | -7.27  | -7.59  | -9.25  | -1.26 | 1.14 | 0.0% | 0.0% | 4.6E-38 |
| 2015 | 542-28-9    | 6-valerolactone                                                                                                                                    | 100 | -32  | 1.8E-01 | 3.4E-04  | 1.5E-00  | 1.40    | 3.5E-06 | 3.5E-06 | 1.1E-16 | conf | conf | 7.4E-01 | 1.0E-00 | 3.8E-01  | -9.30  | -9.14  | -10.92 | -1.61 | 0.93 | 0.0% | 0.0% | 1.1E-40 |
| 2016 | 3699-54-4   | N-hydroxyethylimidazolidine-2-one                                                                                                                  | 130 | 93   | 2.1E-01 | 1.5E-05  | 3.2E-02  | 1.40    | 3.5E-06 | 3.5E-06 | 3.5E-06 | conf | conf | 7.4E-01 | 1.0E-00 | 3.8E-01  | -7.91  | -9.05  | -10.94 | -0.46 | 0.81 | 0.0% | 0.0% | 5.3E-40 |
| 2017 | 501-53-1    | 3-methylsulfonammonium                                                                                                                             | 89  | -32  | 2.1E-03 | 3.2E-05  | 3.4E-01  | 9.9     | 3.5E-06 | 3.5E-06 | 1.1E-16 | conf | conf | 7.3E-01 | 1.0E-00 | 3.8E-01  | -8.49  | -9.36  | -10.91 | -1.29 | 0.32 | 0.0% | 0.0% | 2.4E-41 |
| 2018 | 3288-764    | N-ethylbenzyl(1,4,5,6-tetraazabenzothiazine)                                                                                                       | 952 | 350  | 1.8E-11 | 5.4E-05  | 3.6E-03  | 1.40    | 3.5E-06 | 1.1E-16 | 3.5E-07 | conf | conf | 4.2E-01 | 5.8E-01 | 2.0E-01  | -10.83 | -10.83 | -10.83 | -0.83 | 0.58 | 0.0% | 0.0% | 5.1E-18 |
| 2019 | 85949-64-8  | diacetylbis(4-phenylthio) (2-ethyl-5-propyl phosphazene)                                                                                           | 480 | 87   | 9.9E-03 | 3.3E-03  | 3.0E-02  | 1.40    | 3.5E-06 | 1.3E-07 | 6.6E-09 | conf | conf | 5.4E-01 | 7.7E-01 | 2.8E-01  | -7.29  | -7.59  | -9.26  | -1.66 | 0.69 | 0.0% | 0.0% | 1.5E-35 |
| 2020 | 505-52-2    | tridecanoic acid                                                                                                                                   | 244 | 150  | 2.1E-10 | 3.1E-02  | 4.7E-03  | 4.6     | 3.5E-06 | 1.1E-16 | 3.5E-07 | conf | conf | 6.9E-01 | 9.6E-01 | 3.5E-01  | -7.98  | -8.64  | -10.47 | -2.87 | 0.54 | 0.0% | 0.0% | 8.5E-28 |
| 2021 | 412009-97-1 | 1,5-dichloro-2-(1-methylthioethyl)-4-nitrobenzene                                                                                                  | 250 | 102  | 1.9E-02 | 8.4E-00  | 1.2E-04  | 1.40    | 3.5E-06 | 1.1E-16 | 3.5E-07 | conf | conf | 6.3E-01 | 8.7E-01 | 3.2E-01  | -9.34  | -9.14  | -10.64 | -2.76 | 0.48 | 0.0% | 0.0% | 1.1E-39 |
| 2022 | 2514-21-8   | 1,2,1,6-tetrahydroimidazo[4,5-b]pyridine-4-methylthioanhydride                                                                                     | 102 | 19   | 1.8E-03 | 1.2E-03  | 2.1E-02  | 1.40    | 3.5E-06 | 1.1E-16 | 1.1E-16 | conf | conf | 6.1E-01 | 8.6E-01 | 3.1E-01  | -9.49  | -9.51  | -10.69 | -0.82 | 0.99 | 0.0% | 0.0% | 1.9E-39 |
| 2023 | 110-59-8    | valerolactone                                                                                                                                      | 83  | -86  | 8.0E-02 | 1.5E-04  | 2.1E-01  | 1.40    | 3.5E-06 | 3.5E-07 | 1.1E-17 | conf | conf | 6.1E-01 | 8.4E-01 | 3.1E-01  | -9.41  | -9.15  | -10.40 | -1.06 | 0.32 | 0.0% | 0.0% | 6.8E-41 |
| 2024 | 365-62-6    | 3-methylpent-3-en-1-ol                                                                                                                             | 88  | -46  | 2.3E-03 | 3.3E-03  | 2.3E-01  | 1.40    | 3.5E-06 | 1.1E-16 | 1.1E-16 | conf | conf | 6.4E-01 | 9.2E-01 | 3.4E-01  | -10.11 | -9.97  | -11.19 | -1.04 | 0.40 | 0.0% | 0.0% | 6.6E-48 |
| 2025 | 5123-82-2   | 1,2-bis(4-phenylthio) [6R-(6H)]-3-(acetoxyethyl)-1-[(5S)-amino-5-carboxy-1-oxopentyl(4S)-6-oxo-5-thia-1-az-2,2,2-trimethyl-1,3-dioxane-3-yl]ethane | 102 | 19   | 1.8E-03 | 1.2E-03  | 2.1E-02  | 1.40    | 3.5E-06 | 1.1E-16 | 1.1E-16 | conf | conf | 6.1E-01 | 8.6E-01 | 3.1E-01  | -9.49  | -9.51  | -10.69 | -0.82 | 0.99 | 0.0% | 0.0% | 1.9E-39 |
| 2026 | 89-79-2     | isopropyl                                                                                                                                          | 154 | -5   | 6.6E-01 | 1.4E-03  | 2.3E-03  | 1.40    | 3.5E-06 | 1.3E-07 | 6.6E-09 | conf | conf | 4.6E-01 | 6.3E-01 | 2.3E-01  | -8.55  | -7.87  | -9.42  | -1.38 | 0.26 | 0.0% | 0.0% | 7.8E-31 |
| 2027 | 26496-90-1  | bis(2,4-dichlorophenyl) carbonate                                                                                                                  | 126 | 17   | 1.5E-05 | 6.7E-07  | 2.1E-02  | 1.40    | 3.5E-06 | 1.1E-16 | 1.1E-16 | conf | conf | 4.6E-01 | 6.3E-01 | 2.3E-01  | -8.55  | -7.87  | -9.42  | -1.38 | 0.26 | 0.0% | 0.0% | 7.8E-31 |
| 2028 | 117-87-8    | octane-1,2-diol                                                                                                                                    | 146 | 24   | 2.2E-01 | 4.0E-03  | 4.7E-01  | 1.40    | 3.5E-06 | 3.5E-06 | 3.5E-06 | conf | conf | 7.0E-01 | 9.7E-01 | 3.6E-01  | -9.42  | -9.51  | -10.99 | -1.46 | 0.70 | 0.0% | 0.0% | 1.4E-42 |
| 2029 | 75-45-4     | 2-methyl-2-butanol                                                                                                                                 | 88  | -61  | 2.4E-03 | 1.1E-05  | 1.7E-01  | 1.40    | 3.5E-06 | 1.3E-07 | 6.6E-09 | conf | conf | 4.6E-01 | 6.4E-01 | 2.3E-01  | -8.51  | -8.85  | -10.07 | -0.27 | 0.70 | 0.0% | 0.0% | 3.2E-49 |
| 2030 | 631-67-5    | 1,4-bis-(4-dimethyl-2-oxoethyl)                                                                                                                    | 137 | 17   | 1.0E-01 | 4.8E-04  | 2.1E-02  | 1.40    | 3.5E-06 | 1.1E-16 | 1.1E-16 | conf | conf | 5.6E-01 | 7.0E-01 | 2.6E-01  | -7.47  | -8.62  | -10.37 | -1.07 | 0.47 | 0.0% | 0.0% | 4.7E-42 |
| 2031 | 6574-99-8   | 3,4-dichlorobenzotrifluoride                                                                                                                       | 172 | 53   | 1.8E-00 | 6.3E-01  | 6.8E-02  | 1.40    | 3.5E-06 | 1.1E-17 | 3.5E-08 | conf | conf | 5.0E-01 | 7.0E-01 | 2.5E-01  | -9.16  | -8.90  | -10.17 | -2.53 | 0.53 | 0.0% | 0.0% | 5.1E-28 |
| 2032 | 104-93-2    | propan-2-ol                                                                                                                                        | 158 | 87   | 9.9E-03 | 1.1E-03  | 3.0E-02  | 1.40    | 3.5E-06 | 1.3E-07 | 6.6E-09 | conf | conf | 5.2E-01 | 7.2E-01 | 2.6E-01  | -7.22  | -7.62  | -9.27  | -1.84 | 0.91 | 0.0% | 0.0% | 1.3E-26 |
| 2033 | 2280-49-1   | N-phenyl-N-[trichloromethyl]thio]benzenesulphonamide                                                                                               | 183 | 186  | 1.7E-01 | 3.1E-04  | 1.40     | 3.5E-06 | 3.5E-06 | 1.1E-16 | 1.1E-16 | conf | conf | 6.0E-01 | 8.3E-01 | 3.0E-01  | -9.08  | -9.68  | -11.09 | -0.33 | 0.93 | 0.0% | 0.0% | 6.3E-54 |
| 2034 | 624-03-3    | thiazole-1,2-dipalmitate                                                                                                                           | 359 | 165  | 2.0E-07 | 1.2E-08  | 1.4E-14  | 1.40    | 3.5E-06 | 1.1E-16 | 3.5E-07 | conf | conf | 3.9E-01 | 5.5E-01 | 1.9E-01  | -10.93 | -10.93 | -10.93 | -1.64 | 1.15 | 0.0% | 0.0% | 1.9E-40 |
| 2035 | 4539-86-8   | 2-methyl-2-butanol                                                                                                                                 | 264 | 109  | 2.4E-03 | 1.1E-05  | 1.7E-01  | 1.40    | 3.5E-06 | 1.3E-07 | 6.6E-09 | conf | conf | 5.2E-01 | 7.2E-01 | 2.       |        |        |        |       |      |      |      |         |

|      |             |                                                                                                                                |      |     |         |          |          |      |         |         |         |      |          |         |          |        |        |        |        |       |      |           |         |
|------|-------------|--------------------------------------------------------------------------------------------------------------------------------|------|-----|---------|----------|----------|------|---------|---------|---------|------|----------|---------|----------|--------|--------|--------|--------|-------|------|-----------|---------|
| 2172 | 1120-714    | 1,3-propanesultone                                                                                                             | 122  | 26  | 3.2E-01 | 1.44E-05 | 3.20E-01 | 1.40 | 3.5E-06 | 1.1E-05 | 3.5E-06 | conf | 4.9E-01  | 6.9E-01 | 2.50E-01 | -10.08 | -9.97  | -11.65 | -0.76  | 0.67  | 0.0% | 8.3E-55   |         |
| 2173 | 111-49-9    | perhydroazepine                                                                                                                | 99   | 68  | 6.6E-04 | 1.86E-01 | 4.6E-01  | 11.0 | 3.5E-06 | 3.5E-07 | 3.5E-07 | conf | 4.9E-01  | 6.9E-01 | 2.50E-01 | -10.08 | -9.97  | -11.65 | -0.76  | 0.67  | 0.0% | 8.3E-57   |         |
| 2174 | 5922-690    | N-[3]-(dimethylamino)propylformamide                                                                                           | 130  | 68  | 5.9E-01 | 1.00E-10 | 1.1E-01  | 9.4  | 3.5E-06 | 3.5E-06 | 3.5E-06 | conf | 4.8E-01  | 6.7E-01 | 2.50E-01 | -8.25  | -9.30  | -11.14 | -0.27  | 0.53  | 0.0% | 1.0E-38   |         |
| 2175 | 107-93-7    | trans-crotonic acid                                                                                                            | 86   | 2   | 3.3E-01 | 1.20E-05 | 7.14E-01 | 140  | 3.5E-06 | 4.2E-06 | 1.1E-06 | conf | 4.8E-01  | 6.7E-01 | 2.50E-01 | -8.63  | -9.49  | -11.20 | -0.75  | 0.79  | 0.0% | 1.1E-50   |         |
| 2176 | 34396-03-7  | 1-isothexyl-2,4-bis(trimethylsilyl)benzylamine                                                                                 | 140  | 7   | 1.1E-01 | 1.1E-01  | 3.3E-01  | 140  | 3.5E-06 | 1.1E-06 | 1.1E-06 | conf | 4.8E-01  | 6.7E-01 | 2.50E-01 | -8.25  | -9.30  | -11.14 | -0.27  | 0.53  | 0.0% | 1.1E-50   |         |
| 2177 | 367-25-4    | 2,4-difluorobenzoic acid                                                                                                       | 129  | 4   | 2.1E-02 | 1.25E-05 | 3.0E-01  | 0    | 3.5E-06 | 1.1E-06 | 3.5E-07 | conf | 4.6E-01  | 6.4E-01 | 2.4E-01  | -7.70  | -7.70  | -8.68  | -10.62 | -3.30 | 0.47 | 0.0%      | 6.8E-33 |
| 2178 | 300-82-9    | pseudobutadiene                                                                                                                | 105  | 41  | 1.4E-01 | 1.4E-04  | 3.0E-01  | 9.4  | 3.5E-06 | 1.1E-06 | 3.5E-07 | conf | 4.6E-01  | 6.4E-01 | 2.4E-01  | -8.76  | -8.63  | -10.39 | -0.87  | 0.55  | 0.0% | 4.3E-44   |         |
| 2179 | 111-231-7   | 2,2'-(ethane-1,2-diylbis(oxy))bis(ethyl diacetate)                                                                             | 124  | 10  | 5.5E-01 | 5.1E-04  | 7.1E-01  | 140  | 3.5E-06 | 3.5E-06 | 3.5E-06 | conf | 4.6E-01  | 6.4E-01 | 2.4E-01  | -8.76  | -8.63  | -10.39 | -0.87  | 0.55  | 0.0% | 4.3E-44   |         |
| 2180 | 1889-67-4   | 1,1,1,1,2,2,2,2-tetrahydroethylenedibenzene                                                                                    | 128  | 74  | 4.2E-02 | 6.1E-02  | 3.0E-01  | 140  | 3.5E-06 | 1.1E-06 | 3.5E-07 | conf | 3.11E-01 | 4.4E-01 | 1.5E-01  | -10.78 | -10.40 | -11.99 | -0.22  | 0.24  | 0.0% | 1.8E-68   |         |
| 2181 | 3031-66-1   | hex-3-ene-2,1-diol                                                                                                             | 114  | 39  | 1.3E-01 | 1.5E-17  | 7.0E-01  | 0    | 3.5E-06 | 1.1E-06 | 3.5E-07 | conf | 3.11E-01 | 4.4E-01 | 1.5E-01  | -10.78 | -10.40 | -11.99 | -0.22  | 0.24  | 0.0% | 3.7E-41   |         |
| 2182 | 2077-01-6   | 608-20-5                                                                                                                       | 159  | 45  | 4.5E-01 | 1.9E-05  | 1.1E-01  | 8.2  | 3.5E-06 | 1.1E-06 | 1.1E-07 | conf | 4.6E-01  | 6.4E-01 | 2.3E-01  | -7.90  | -8.70  | -10.62 | -1.68  | 0.85  | 0.0% | 1.1E-31-7 |         |
| 2183 | 76018-0-2   | sodium 1,2-dihydro-2-oxo-1H-benzimidazol-5-yl-3-hydroxyphenylacetate-2-carboxamate                                             | 342  | 87  | 9.9E-03 | 2.4E-03  | 3.0E-02  | 140  | 3.5E-06 | 1.8E-07 | 6.6E-09 | conf | 3.1E-01  | 5.0E-01 | 1.8E-01  | -7.47  | -7.78  | -9.44  | -1.84  | 0.64  | 0.0% | 9.1E-28   |         |
| 2184 | 39072-03-3  | N,N'-hexane-1,6-diylbis(1H-benzimidazole)                                                                                      | 284  | 10  | 1.2E-01 | 1.4E-01  | 3.0E-01  | 8.8  | 3.5E-06 | 1.1E-06 | 1.1E-06 | conf | 3.1E-01  | 5.0E-01 | 1.8E-01  | -7.47  | -7.78  | -9.44  | -1.84  | 0.64  | 0.0% | 9.1E-28   |         |
| 2185 | 43555-78-2  | tetrasodium 2,2',2'',2'''-ethene-1,2'-diylbis[4,4'-(diethylamino)-4,4'-bis(sulfonatophenylamino)-1,3,5-triazine-2-yl]viaminols | 1102 | 87  | 9.9E-03 | 7.6E-03  | 3.0E-02  | 140  | 3.5E-06 | 1.8E-07 | 6.6E-09 | conf | 3.1E-01  | 5.0E-01 | 1.8E-01  | -7.47  | -7.78  | -9.44  | -1.84  | 0.64  | 0.0% | 8.0E-28   |         |
| 2186 | 123-75-1    | pyrididine                                                                                                                     | 171  | 96  | 8.8E-03 | 3.9E-03  | 5.0E-03  | 103  | 3.5E-06 | 1.1E-06 | 1.1E-06 | conf | 4.8E-01  | 6.7E-01 | 2.50E-01 | -10.30 | -10.22 | -11.61 | -1.09  | 0.26  | 0.0% | 2.5E-51   |         |
| 2187 | 97-79-9     | N-isopropylaziridine                                                                                                           | 271  | 149 | 8.8E-03 | 3.9E-03  | 5.0E-03  | 103  | 3.5E-06 | 1.1E-06 | 1.1E-06 | conf | 4.8E-01  | 6.7E-01 | 2.50E-01 | -10.30 | -10.22 | -11.61 | -1.09  | 0.26  | 0.0% | 2.5E-51   |         |
| 2188 | 93-04-9     | methyl-1-naphthyl ether                                                                                                        | 138  | 34  | 3.6E-01 | 7.9E-01  | 1.0E-01  | 3.40 | 3.5E-06 | 1.1E-06 | 3.5E-07 | conf | 2.8E-01  | 3.9E-01 | 1.4E-01  | -8.64  | -8.37  | -9.51  | -2.23  | 0.33  | 0.0% | 1.3E-25   |         |
| 2189 | 17766-26-6  | 1,3,5-triazine-2,4,6-tris(1H-1h3-trishino, trisodium salt                                                                      | 343  | 87  | 9.9E-03 | 1.7E-03  | 3.0E-02  | 140  | 3.5E-06 | 1.8E-07 | 6.6E-09 | conf | 3.1E-01  | 5.0E-01 | 1.8E-01  | -7.48  | -7.48  | -9.44  | -1.73  | 0.55  | 0.0% | 7.8E-26   |         |
| 2190 | 3626-25-4   | 800-188-1                                                                                                                      | 138  | -25 | 2.9E-02 | 5.4E-04  | 2.2E-01  | 140  | 3.5E-06 | 3.5E-07 | 1.1E-07 | conf | 2.8E-01  | 4.0E-01 | 1.4E-01  | -10.5E | -10.5E | -10.62 | -13.24 | -2.43 | 0.23 | 0.0%      | 3.9E-54 |
| 2191 | 6362-80-7   | 1,1,1,1-tetrakis(3-methylene-1,3-propenyl)bisbenzene                                                                           | 236  | 67  | 3.0E-02 | 1.8E-01  | 3.2E-02  | 140  | 3.5E-06 | 1.1E-06 | 3.5E-07 | conf | 3.3E-01  | 4.3E-01 | 1.5E-01  | -10.00 | -10.46 | -11.54 | -3.74  | 0.19  | 0.0% | 3.8E-29   |         |
| 2192 | 108-16-7    | 1-(dimethylamino)propan-2-ol                                                                                                   | 103  | 41  | 6.7E-02 | 8.2E-05  | 3.0E-01  | 8.8  | 3.5E-06 | 3.5E-06 | 3.5E-06 | conf | 4.7E-01  | 6.5E-01 | 2.4E-01  | -9.64  | -9.49  | -11.13 | -1.03  | 0.34  | 0.0% | 1.1E-47   |         |
| 2193 | 104-38-1    | 2,2'-p-phenylenediethanol                                                                                                      | 188  | 103 | 8.8E-05 | 1.1E-05  | 4.1E-01  | 140  | 3.5E-06 | 1.1E-06 | 1.1E-06 | conf | 4.5E-01  | 6.2E-01 | 2.3E-01  | -7.45  | -8.56  | -10.58 | -1.09  | 0.43  | 0.0% | 9.6E-54   |         |
| 2194 | 2212-11-5   | 606-938-2                                                                                                                      | 155  | -45 | 5.9E-02 | 1.0E-05  | 6.9E-01  | 140  | 3.5E-06 | 1.1E-06 | 3.5E-07 | conf | 4.4E-01  | 6.2E-01 | 2.3E-01  | -8.62  | -9.43  | -10.75 | -1.84  | 0.64  | 0.0% | 2.0E-37   |         |
| 2195 | 930-02-9    | 1-vinylpyrrolidone                                                                                                             | 297  | 75  | 1.1E-01 | 1.9E-04  | 3.9E-01  | 140  | 3.5E-06 | 1.1E-06 | 3.5E-07 | conf | 2.7E-01  | 3.8E-01 | 1.3E-01  | -9.84  | -9.97  | -11.63 | -3.84  | 0.07  | 0.0% | 6.5E-37   |         |
| 2196 | 86-73-7     | fluorene                                                                                                                       | 166  | 64  | 4.4E-02 | 4.1E-04  | 2.0E-01  | 140  | 3.5E-06 | 8.9E-06 | 3.5E-08 | conf | 3.1E-01  | 4.4E-01 | 1.6E-01  | -9.04  | -8.79  | -9.97  | -2.62  | 0.78  | 0.0% | 4.2E-26   |         |
| 2197 | 86-18-4     | 2-tert-butylphenol                                                                                                             | 150  | 37  | 7.1E-01 | 3.9E-03  | 2.4E-01  | 10.8 | 3.5E-06 | 2.2E-06 | 1.1E-06 | conf | 2.7E-01  | 3.7E-01 | 1.3E-01  | -8.77  | -8.50  | -9.45  | -2.44  | 0.84  | 0.0% | 3.3E-25   |         |
| 2198 | 20749-82-0  | 1,3-bis(1H-1h3-trishino)-1,2H-phenolphthalein-2-one                                                                            | 408  | 231 | 2.3E-09 | 3.7E-01  | 6.1E-05  | 7.2  | 3.5E-06 | 1.1E-06 | 3.5E-07 | conf | 2.7E-01  | 3.7E-01 | 1.3E-01  | -7.87  | -8.18  | -9.09  | -1.17  | 1.00  | 0.0% | 3.0E-40   |         |
| 2199 | 462-94-2    | pentamethylenediamine                                                                                                          | 102  | 13  | 1.3E-02 | 1.0E-08  | 7.1E-01  | 10.7 | 3.5E-06 | 1.1E-06 | 1.1E-06 | conf | 4.4E-01  | 6.1E-01 | 2.3E-01  | -8.85  | -8.72  | -10.01 | -0.82  | 1.06  | 0.0% | 9.3E-45   |         |
| 2200 | 1746-21-2   | p-tert-butylbenzene                                                                                                            | 160  | 0   | 3.0E-01 | 5.9E-02  | 6.1E-01  | 140  | 3.5E-06 | 3.5E-07 | 1.1E-07 | conf | 2.8E-01  | 4.0E-01 | 1.4E-01  | -10.80 | -10.32 | -11.56 | -2.41  | 0.21  | 0.0% | 3.7E-46   |         |
| 2201 | 78-16-0     | 2-ethyl-2H-1,1'-oxoethoxy[ethyl(methyl)propane-1,3-diy]bisacetate                                                              | 471  | 130 | 2.4E-05 | 3.0E-03  | 1.5E-01  | 0    | 3.5E-06 | 1.1E-06 | 3.5E-07 | conf | 2.7E-01  | 3.8E-01 | 1.4E-01  | -8.01  | -8.14  | -10.82 | -4.53  | 0.54  | 0.0% | 1.2E-10   |         |
| 2202 | 54112-23-1  | N,N'-methylbis(p-phenylenebis(hydroxy-2-oxo-1H-azapine-1-carboxamide) cholestanes                                              | 387  | 162 | 2.4E-05 | 4.1E-04  | 5.5E-01  | 140  | 3.5E-06 | 1.1E-06 | 3.5E-07 | conf | 2.7E-01  | 3.8E-01 | 1.3E-01  | -9.34  | -9.68  | -9.99  | -5.26  | 0.48  | 0.0% | 7.4E-12   |         |
| 2203 | 2124-24-2   | hexahydro-2H-azepin-2-one, sodium salt                                                                                         | 135  | 87  | 9.9E-03 | 9.3E-02  | 3.0E-02  | 140  | 3.5E-06 | 1.8E-07 | 6.6E-09 | conf | 3.4E-01  | 4.7E-01 | 1.7E-01  | -7.51  | -7.81  | -9.45  | -1.18  | 0.42  | 0.0% | 2.1E-43   |         |
| 2204 | 760-93-0    | methacrylic anhydride                                                                                                          | 154  | 164 | 1.2E-03 | 4.0E-03  | 7.1E-01  | 140  | 3.5E-06 | 1.1E-06 | 1.1E-06 | conf | 4.3E-01  | 5.9E-01 | 2.2E-01  | -8.03  | -8.03  | -9.44  | -1.84  | 0.64  | 0.0% | 1.1E-48   |         |
| 2205 | 470-87-6    | cineole                                                                                                                        | 154  | 8   | 2.1E-02 | 1.7E-01  | 1.3E-01  | 140  | 3.5E-06 | 4.4E-06 | 1.1E-07 | conf | 2.6E-01  | 3.6E-01 | 1.3E-01  | -10.83 | -10.44 | -12.93 | -1.03  | 0.70  | 0.0% | 4.4E-65   |         |
| 2206 | 75-57-0     | triethyltetraammonium chloride                                                                                                 | 110  | 40  | 9.9E-03 | 7.6E-02  | 3.0E-02  | 140  | 3.5E-06 | 1.8E-07 | 6.6E-09 | conf | 3.4E-01  | 4.7E-01 | 1.7E-01  | -7.51  | -7.81  | -9.45  | -1.18  | 0.42  | 0.0% | 2.1E-43   |         |
| 2207 | 1847-67-8   | 2,2'-azobis(2-methylbutyronitrile)                                                                                             | 126  | 64  | 1.2E-01 | 1.4E-02  | 7.1E-01  | 140  | 3.5E-06 | 1.1E-06 | 1.1E-06 | conf | 2.7E-01  | 3.8E-01 | 1.3E-01  | -8.71  | -8.85  | -10.62 | -1.44  | 0.64  | 0.0% | 2.5E-40   |         |
| 2208 | 104-66-5    | 1,2-diphenylethane                                                                                                             | 214  | 71  | 2.2E-02 | 2.8E-01  | 6.5E-01  | 140  | 3.5E-06 | 3.5E-07 | 3.5E-07 | conf | 3.7E-01  | 5.1E-01 | 1.8E-01  | -8.88  | -8.66  | -10.25 | -2.94  | 0.25  | 0.0% | 7.6E-26   |         |
| 2209 | 123000-75-5 | 2-methylbenzene-1,4-diy bis[4-(4-acyloxy[butoxy]benzoate)]                                                                     | 120  | 75  | 1.2E-01 | 1.0E-04  | 7.5E-01  | 140  | 3.5E-06 | 1.1E-06 | 1.1E-06 | conf | 3.7E-01  | 5.1E-01 | 1.8E-01  | -8.88  | -8.66  | -10.25 | -2.94  | 0.25  | 0.0% | 7.6E-26   |         |
| 2210 | 2031-67-6   | triethylmethoxyamine                                                                                                           | 178  | -23 | 7.7E-02 | 1.7E-01  | 6.3E-01  | 140  | 3.5E-06 | 1.1E-06 | 1.1E-06 | conf | 3.9E-01  | 5.5E-01 | 2.0E-01  | -10.40 | -10.12 | -11.91 | -2.55  | 1.08  | 0.0% | 6.6E-68   |         |
| 2211 | 133-66-4    | dioxane-4,4'-bis[4,5-diamino-1,9,10,10'-tetrahydrop-9,10,10'-trioxo-1,1'-bianthracene]-3,3'-disulphonate                       | 937  | 87  | 9.9E-03 | 6.5E-03  | 3.0E-02  | 140  | 3.5E-06 | 1.8E-07 | 6.6E-09 | conf | 3.3E-01  | 4.6E-01 | 1.7E-01  | -7.48  | -7.81  | -9.47  | -0.37  | 0.25  | 0.0% | 5.8E-39   |         |
| 2212 | 6246-51-9   | 3,3'-oxybis(ethylenediamine)bis(azepan-2-one)                                                                                  | 277  | 197 | 1.3E-01 | 9.9E-01  | 3.5E-02  | 140  | 3.5E-06 | 1.1E-06 | 1.1E-06 | conf | 4.2E-01  | 5.8E-01 | 2.1E-01  | -7.33  | -8.48  | -10.63 | -1.44  | 0.31  | 0.0% | 3.7E-46   |         |
| 2213 | 107-11-9    | allylamine                                                                                                                     | 57   | -73 | 3.4E-04 | 1.0E-06  | 1.6E-01  | 100  | 3.5E-06 | 4.2E-07 | 1.1E-07 | conf | 3.9E-01  | 5.4E-01 | 2.0E-01  | -9.60  | -9.37  | -10.49 | -1.59  | 0.54  | 0.0% | 2.3E-37   |         |
| 2214 | 2691-41-9   | octadecyl-1,3,5,7-tetrakis-1,3,5,7-tetrazine                                                                                   | 286  | 183 | 3.2E-05 | 1.2E-06  | 6.6E-01  | 140  | 3.5E-06 | 1.0E-07 | 1.1E-07 | conf | 3.2E-01  | 4.5E-01 | 1.6E-01  | -8.45  | -8.55  | -7.77  | -9.14  | -1.52 | 0.10 | 0.0%      | 3.1E-29 |
| 2215 | 545147-3    | 3,9-bis(2,4-di-tert-butylphenyl)-2,4,8,10-tetraoxa-3,9-diphosphaspiro[5.5]undecane                                             | 238  | 147 | 3.6E-04 | 1.2E-01  | 2.4E-01  | 140  | 3.5E-06 | 1.1E-06 | 3.5E-07 | conf | 3.7E-01  | 5.2E-01 | 1.9E-01  | -9.60  | -9.40  | -10.87 | -4.45  | 0.22  | 0.0% | 1.6E-26   |         |
| 2216 | 84-15-1     | 2-ethylanthracene                                                                                                              | 236  | 147 | 3.6E-04 | 1.2E-01  | 2.4E-01  | 140  | 3.5E-06 | 1.1E-06 | 3.5E-07 | conf | 3.7E-01  | 5.2E-01 | 1.9E-01  | -9.60  | -9.40  | -10.87 | -4.45  | 0.22  | 0.0% | 1.6E-26   |         |
| 2217 | 5746-19-2   | 2-methylphenylacetate                                                                                                          | 152  | 103 | 8.8E-03 | 3.9E-03  | 5.0E-03  | 103  | 3.5E-06 | 1.1E-06 | 1.1E-06 | conf | 4.8E-01  | 6.7E-01 | 2.50E-01 | -10.30 | -10.22 | -11.61 | -1.09  | 0.26  | 0.0% | 2.5E-51   |         |
| 2218 | 6022-22-6   | dioxane-4,4'-bis[4,5-diamino-1,9,10,10'-tetrahydrop-9,10,10'-trioxo-1,1'-bianthracene]-3,3'-disulphonate                       | 937  | 87  | 9.9E-03 | 6.5E-03  | 3.0E-02  | 140  | 3.5E-06 | 1.8E-07 | 6.6E-09 | conf | 3.3E-01  | 4.6E-01 | 1.7E-01  | -7.48  | -7.81  | -9.47  | -0.37  | 0.25  | 0.0% | 5.8E-39   |         |
| 2219 | 450-161-1   | 4-oxo-1H-fluoreno-9-sulfoxide                                                                                                  | 161  | 10  | 5.5E-01 | 4.5E-01  | 3.0E-02  | 140  | 3.5E-06 | 1.1E-06 | 1.1E-06 | conf | 4.2E-01  | 5.8E-01 | 2.1E-01  | -7.95  | -8.97  | -10.76 | -2.23  | 0.61  | 0.0% | 1.8E-34   |         |
| 2220 | 104-23-4    | 4-aminooxazoline-5-sulphonic acid                                                                                              | 277  | 197 | 1.3E-01 | 9.9E-01  | 3.5E-02  | 140  | 3.5E-06 | 1.1E-06 | 1.1E-06 | conf | 4.2E-0   |         |          |        |        |        |        |       |      |           |         |







|      |             |                                                                                                                                    |     |     |         |         |         |      |         |         |         |      |      |         |         |         |        |       |        |       |      |      |      |         |
|------|-------------|------------------------------------------------------------------------------------------------------------------------------------|-----|-----|---------|---------|---------|------|---------|---------|---------|------|------|---------|---------|---------|--------|-------|--------|-------|------|------|------|---------|
| 2904 | 1035.694    | Androst-4,9(11)-diene-3,17-dione                                                                                                   | 284 | 151 | 2.3E-04 | 1.4E-01 | 4.7E-02 | 0    | 3.5E-06 | 3.5E-07 | 3.5E-07 | conf | conf | 9.2E+00 | 1.3E-01 | 4.7E+00 | -8.35  | 8.89  | -10.70 | -1.64 | 0.17 | 0.0% | 0.0% | 1.3E-38 |
| 2905 | 104372.318  | 1-(benz[1,3-benzodioxol-5-yl]-2-methyl-4-methoxy-2-oxopropyl)-3,4-dioxole                                                          | 229 | 121 | 1.4E-02 | 6.5E-03 | 4.5E-03 | 0    | 3.5E-06 | 3.5E-07 | 3.5E-07 | conf | conf | 9.2E+00 | 1.3E-01 | 4.7E+00 | -8.35  | 8.89  | -10.70 | -1.64 | 0.17 | 0.0% | 0.0% | 8.5E-40 |
| 2906 | 1638.864    | dimethylphenylphosphonite                                                                                                          | 128 | 26  | 1.9E-07 | 1.7E-02 | 1.5E-02 | 0    | 3.5E-06 | 3.5E-07 | 1.1E-07 | conf | conf | 9.2E+00 | 1.3E-01 | 4.7E+00 | -8.01  | 8.75  | -10.03 | -1.74 | 0.19 | 0.0% | 0.0% | 2.8E-37 |
| 2907 | 4079.987    | 4-(4-methylbenzylidene-2-ylidene)                                                                                                  | 254 | 163 | 2.0E-05 | 6.8E-02 | 2.3E-04 | 0    | 3.5E-06 | 3.5E-07 | 1.1E-07 | conf | conf | 9.2E+00 | 1.3E-01 | 4.6E+00 | -8.43  | 8.80  | -10.65 | -2.0  | 1.63 | 0.0% | 0.0% | 1.4E-34 |
| 2908 | 3886.699    | O-methylbenzoylamino                                                                                                               | 120 | 41  | 1.2E-01 | 3.7E-01 | 3.1E-01 | 0    | 3.5E-06 | 3.5E-07 | 1.1E-07 | conf | conf | 9.2E+00 | 1.3E-01 | 4.6E+00 | -8.43  | 8.80  | -10.65 | -2.0  | 1.63 | 0.0% | 0.0% | 1.1E-34 |
| 2909 | 2627.863    | 1-methylbenzoylamino                                                                                                               | 121 | 0   | 7.2E-01 | 3.7E-01 | 3.1E-01 | 0    | 3.5E-06 | 3.5E-07 | 6.6E-08 | conf | conf | 9.1E+00 | 1.3E-01 | 4.6E+00 | -8.77  | 9.50  | -10.76 | -1.73 | 0.21 | 0.0% | 0.0% | 2.1E-38 |
| 2910 | 27472.15    | 1,4-dimethoxyphenylacetone                                                                                                         | 205 | 95  | 1.4E-02 | 1.6E-02 | 1.5E-02 | 0    | 3.5E-06 | 3.5E-07 | 6.6E-09 | conf | conf | 9.2E+00 | 1.3E-01 | 4.6E+00 | -8.62  | 8.40  | -10.03 | -1.13 | 0.32 | 0.0% | 0.0% | 3.3E-33 |
| 2911 | 7575.217    | pentamethyltetrahydro-2-mercaptopyranate                                                                                           | 121 | 121 | 4.4E-09 | 2.1E-01 | 3.9E-02 | 0    | 3.5E-06 | 3.5E-07 | 1.1E-07 | conf | conf | 9.2E+00 | 1.3E-01 | 4.6E+00 | -8.62  | 8.40  | -10.03 | -1.13 | 0.32 | 0.0% | 0.0% | 1.1E-34 |
| 2912 | 201234.531  | 4-methyl-1-acetamido-5-iodo-2-methoxybenzene                                                                                       | 149 | 177 | 6.1E-06 | 1.6E-02 | 1.0E-02 | 0    | 3.5E-06 | 3.5E-07 | 6.6E-09 | conf | conf | 9.1E+00 | 1.3E-01 | 4.6E+00 | -7.49  | 8.35  | -10.01 | -1.89 | 1.09 | 0.0% | 0.0% | 1.8E-31 |
| 2913 | 7139.166    | 615-927-1                                                                                                                          | 12  | 201 | 1.4E-04 | 6.1E-04 | 2.2E-04 | 0    | 3.5E-06 | 3.5E-07 | 1.1E-07 | conf | conf | 9.2E+00 | 1.3E-01 | 4.6E+00 | -8.60  | 8.51  | -10.67 | -1.75 | 0.64 | 0.0% | 0.0% | 5.4E-30 |
| 2914 | 3071.372    | 1-phenylethyl hydroperoxide                                                                                                        | 128 | 21  | 1.7E-01 | 8.2E-01 | 5.0E-01 | 0    | 3.5E-06 | 3.5E-07 | 1.1E-07 | conf | conf | 9.2E+00 | 1.3E-01 | 4.6E+00 | -9.07  | 10.73 | -12.99 | -0.88 | 0.08 | 0.0% | 0.0% | 1.3E-31 |
| 2915 | 877179.049  | 3,4-dichloro-5-fluorophenyl-2-amine                                                                                                | 225 | 123 | 9.7E-04 | 1.7E-01 | 2.1E-01 | 0    | 3.5E-06 | 3.5E-07 | 3.5E-08 | conf | conf | 9.2E+00 | 1.3E-01 | 4.6E+00 | -8.16  | 8.72  | -10.64 | -2.38 | 0.32 | 0.0% | 0.0% | 3.6E-26 |
| 2916 | 1183232.314 | 5-amine-2,4-diol-tert-butylmethyl carbamate                                                                                        | 256 | 129 | 1.4E-01 | 1.4E-01 | 1.4E-01 | 0    | 3.5E-06 | 3.5E-07 | 1.1E-07 | conf | conf | 9.2E+00 | 1.3E-01 | 4.6E+00 | -8.16  | 8.72  | -10.64 | -2.38 | 0.32 | 0.0% | 0.0% | 3.6E-26 |
| 2917 | 84713.177   | 2,2-Axi-2,4,4-trimethylphenylcarbamate                                                                                             | 150 | 39  | 1.1E-06 | 2.0E-04 | 4.4E-01 | 0    | 3.5E-06 | 3.5E-07 | 6.6E-08 | conf | conf | 9.1E+00 | 1.3E-01 | 4.6E+00 | -8.61  | 8.46  | -10.07 | -0.85 | 0.39 | 0.0% | 0.0% | 6.0E-40 |
| 2918 | 37750.291   | 609-474-9                                                                                                                          | 236 | 125 | 7.6E-06 | 9.0E-01 | 8.0E-04 | 1.3  | 3.5E-06 | 3.5E-07 | 1.1E-07 | conf | conf | 9.2E+00 | 1.3E-01 | 4.6E+00 | -8.41  | 8.82  | -10.07 | -1.74 | 0.55 | 0.0% | 0.0% | 5.1E-30 |
| 2919 | 42872.297   | 3-((1-cyanoethyl)benzoyl) chloride                                                                                                 | 129 | 44  | 3.8E-02 | 1.1E-01 | 2.1E-01 | 0    | 3.5E-06 | 3.5E-07 | 1.1E-07 | conf | conf | 9.2E+00 | 1.3E-01 | 4.6E+00 | -8.74  | 9.61  | -11.34 | -0.84 | 0.04 | 0.0% | 0.0% | 2.5E-29 |
| 2920 | 1881.171    | 5-phenyl-o-aminidine                                                                                                               | 139 | 110 | 2.5E-03 | 5.0E-01 | 1.3E-01 | 0    | 3.5E-06 | 3.5E-07 | 1.1E-07 | conf | conf | 9.2E+00 | 1.3E-01 | 4.7E+00 | -8.21  | 8.77  | -10.64 | -2.30 | 0.50 | 0.0% | 0.0% | 5.2E-33 |
| 2921 | 221208.04   | 606-964                                                                                                                            | 266 | 208 | 1.5E-02 | 2.4E-02 | 1.0E-01 | 0    | 3.5E-06 | 3.5E-07 | 1.1E-07 | conf | conf | 9.2E+00 | 1.3E-01 | 4.6E+00 | -8.00  | 8.51  | -10.67 | -1.75 | 0.64 | 0.0% | 0.0% | 5.4E-30 |
| 2922 | 81.834      | naphthalene-1,8-dicarboximide                                                                                                      | 197 | 210 | 5.1E-08 | 2.0E-02 | 9.8E-01 | 0    | 3.5E-06 | 3.5E-07 | 6.6E-09 | conf | conf | 9.1E+00 | 1.3E-01 | 4.6E+00 | -7.34  | 8.31  | -9.97  | -1.21 | 1.03 | 0.0% | 0.0% | 1.6E-29 |
| 2923 | 566142.0    | 3,4-Dichloro-1,2-dichloro-5-carbonyl chloride                                                                                      | 216 | 86  | 2.5E-02 | 6.1E-01 | 5.4E-01 | 0    | 3.5E-06 | 3.5E-07 | 1.1E-07 | conf | conf | 9.2E+00 | 1.3E-01 | 4.6E+00 | -9.51  | 9.28  | -10.80 | -2.15 | 0.46 | 0.0% | 0.0% | 2.1E-35 |
| 2924 | 111.691     | 4-(6-amine-1-hydroxy-9-substito-2-naphthyl)-3-hydroxy-7-nitronaphthalene-1-sulphonic acid                                          | 254 | 359 | 3.4E-05 | 9.1E-06 | 5.0E-01 | 0    | 3.5E-06 | 3.5E-07 | 1.1E-07 | conf | conf | 9.2E+00 | 1.3E-01 | 4.6E+00 | -8.04  | 8.78  | -10.60 | -1.13 | 0.69 | 0.0% | 0.0% | 5.3E-34 |
| 2925 | 4137.568    | 609-920-2                                                                                                                          | 338 | 186 | 2.0E-06 | 2.0E-02 | 1.2E-01 | 0    | 3.5E-06 | 3.5E-07 | 1.1E-07 | conf | conf | 9.2E+00 | 1.3E-01 | 4.7E+00 | -7.78  | 8.73  | -10.03 | -1.47 | 0.87 | 0.0% | 0.0% | 1.9E-39 |
| 2926 | 151121.159  | 4-gluconiccarboxylic acid, 1-cyclopropyl-4,8-difluoro-1,4-dihydro-7-[(4aS,7S)-octahydro-6H-pyrrolo-[3,4-b]pyridin-2-ylidene]       | 389 | 321 | 5.8E-12 | 1.0E-02 | 1.2E-01 | 8.7  | 3.5E-06 | 3.5E-07 | 3.5E-07 | conf | conf | 9.2E+00 | 1.3E-01 | 4.7E+00 | -7.82  | 8.82  | -10.63 | -1.09 | 0.64 | 0.0% | 0.0% | 2.4E-27 |
| 2927 | 100385.144  | Unknow                                                                                                                             | 207 | 46  | 3.9E-00 | 8.6E-01 | 3.5E-04 | 5.9  | 3.5E-06 | 3.5E-07 | 1.1E-07 | conf | conf | 9.2E+00 | 1.3E-01 | 4.7E+00 | -8.00  | 8.78  | -10.03 | -1.62 | 1.07 | 0.0% | 0.0% | 2.5E-29 |
| 2928 | 39255.32    | ethyl 2-methylacetate                                                                                                              | 144 | 44  | 3.8E-02 | 1.4E-01 | 5.0E-01 | 0    | 3.5E-06 | 3.5E-07 | 1.1E-07 | conf | conf | 1.0E+01 | 1.4E-01 | 5.2E+00 | -9.13  | 10.18 | -11.88 | -2.27 | 0.63 | 0.0% | 0.0% | 5.0E-43 |
| 2929 | 1385.06     | cis-propenylphosphonic acid                                                                                                        | 122 | 12  | 2.3E-02 | 1.4E-01 | 5.0E-01 | 0    | 3.5E-06 | 3.5E-07 | 3.5E-07 | conf | conf | 9.2E+00 | 1.3E-01 | 4.7E+00 | -7.81  | 8.73  | -10.61 | -0.32 | 1.29 | 0.0% | 0.0% | 3.3E-40 |
| 2930 | 698.29      | 4-amine-2-methylpyridine-5-carbonitrile                                                                                            | 134 | 99  | 8.0E-02 | 4.6E+04 | 4.7E-01 | 14.0 | 3.5E-06 | 3.5E-07 | 3.5E-07 | conf | conf | 9.2E+00 | 1.3E-01 | 4.7E+00 | -7.95  | 8.72  | -10.61 | -1.79 | 0.97 | 0.0% | 0.0% | 1.1E-36 |
| 2931 | 239956.54   | 607-301-1                                                                                                                          | 121 | 77  | 8.7E-02 | 4.7E+04 | 1.3E+00 | 0    | 3.5E-06 | 3.5E-07 | 1.1E-07 | conf | conf | 9.2E+00 | 1.3E-01 | 4.7E+00 | -7.75  | 8.69  | -10.59 | -2.09 | 1.28 | 0.0% | 0.0% | 3.2E-34 |
| 2932 | 2231.521    | O,2-diisobutyl hydrogen dithiophosphate                                                                                            | 192 | 39  | 6.4E-01 | 1.6E-01 | 1.1E+04 | 14.0 | 3.5E-06 | 3.5E-07 | 1.1E-07 | conf | conf | 9.2E+00 | 1.3E-01 | 4.7E+00 | -10.80 | 10.36 | -11.76 | -2.21 | 1.21 | 0.0% | 0.0% | 2.0E-27 |
| 2933 | 580959.561  | (8E-trans)-7-amine-8-oxo-1-[(1,2,5,6-tetrahydro-2-methyl-5,6-dioxo-1,2,4-triazin-3-ylthio)methyl]-5-thia-1-azabicyclo[3.3.0]octane | 371 | 339 | 2.0E-15 | 8.7E+04 | 1.1E+04 | 2.4  | 3.5E-06 | 3.5E-07 | 3.5E-07 | conf | conf | 9.2E+00 | 1.3E-01 | 4.7E+00 | -7.54  | 8.69  | -10.57 | -3.9  | 2.86 | 0.0% | 0.0% | 5.1E-25 |
| 2934 | 101090.467  | 600-261-1                                                                                                                          | 209 | 88  | 1.1E-01 | 4.3E-01 | 4.6E-01 | 9.5  | 3.5E-06 | 3.5E-07 | 1.1E-07 | conf | conf | 9.2E+00 | 1.3E-01 | 4.6E+00 | -8.00  | 8.51  | -10.67 | -1.75 | 0.64 | 0.0% | 0.0% | 5.4E-30 |
| 2935 | 95.923      | 4-amine-2-methylpyridine-5-methylamine                                                                                             | 138 | 101 | 1.0E-01 | 1.0E-06 | 1.9E-02 | 14.0 | 3.5E-06 | 3.5E-07 | 1.1E-07 | conf | conf | 9.2E+00 | 1.3E-01 | 4.7E+00 | -7.74  | 8.68  | -10.59 | -1.60 | 1.10 | 0.0% | 0.0% | 5.0E-38 |
| 2936 | 1154308.86  | 800-884-5                                                                                                                          | 201 | 119 | 7.6E-05 | 3.5E-02 | 3.8E-07 | 0    | 3.5E-06 | 3.5E-07 | 1.1E-07 | conf | conf | 1.0E+01 | 1.4E-01 | 5.2E+00 | -8.49  | 9.48  | -11.25 | -1.42 | 0.54 | 0.0% | 0.0% | 4.2E-45 |
| 2937 | 96.860      | 3-into-1-toluic acid                                                                                                               | 181 | 112 | 4.5E-03 | 1.3E-01 | 2.1E-02 | 0    | 3.5E-06 | 3.5E-07 | 1.1E-07 | conf | conf | 9.2E+00 | 1.3E-01 | 4.6E+00 | -8.16  | 8.72  | -10.64 | -2.38 | 0.32 | 0.0% | 0.0% | 3.6E-26 |
| 2938 | 116.75      | 1,4-bisdimethylaminomethanquinone                                                                                                  | 475 | 280 | 9.8E-13 | 3.8E-06 | 7.4E+00 | 14.0 | 3.5E-06 | 3.5E-07 | 1.1E-07 | conf | conf | 6.2E+00 | 8.6E-02 | 3.2E+00 | -4.42  | 9.61  | -10.12 | -3.26 | 1.49 | 0.0% | 0.0% | 2.0E-35 |
| 2939 | 1758.84.0   | 1,2-dimethylimidazole                                                                                                              | 86  | 26  | 3.6E-03 | 1.7E-01 | 3.1E-01 | 8.2  | 3.5E-06 | 3.5E-07 | 1.1E-07 | conf | conf | 9.1E+00 | 1.3E-01 | 4.6E+00 | -8.20  | 8.95  | -10.65 | -1.12 | 0.31 | 0.0% | 0.0% | 1.6E-42 |
| 2940 | 61636.066   | 2-ethoxy-4-hydroxypyrimidin-4(2H)-one                                                                                              | 156 | 66  | 1.6E-08 | 1.6E-01 | 6.9E-01 | 4.6  | 3.5E-06 | 3.5E-07 | 1.1E-07 | conf | conf | 9.2E+00 | 1.3E-01 | 4.6E+00 | -8.16  | 8.72  | -10.64 | -2.38 | 0.32 | 0.0% | 0.0% | 3.6E-26 |
| 2941 | 4637.245    | 1,1-dimethylpyrrolidine                                                                                                            | 119 | -58 | 3.7E-03 | 4.9E-01 | 3.1E-01 | 4.7  | 3.5E-06 | 3.5E-07 | 1.1E-07 | conf | conf | 1.0E+01 | 1.4E-01 | 5.2E+00 | -8.90  | 9.38  | -11.27 | -1.42 | 0.67 | 0.0% | 0.0% | 1.1E-41 |
| 2942 | 591.22.0    | 2,5-dimethylpyridine                                                                                                               | 120 | 58  | 5.4E-02 | 3.5E-01 | 2.1E-01 | 6.2  | 3.5E-06 | 3.5E-07 | 1.1E-07 | conf | conf | 9.2E+00 | 1.3E-01 | 4.6E+00 | -8.00  | 8.51  | -10.67 | -1.75 | 0.64 | 0.0% | 0.0% | 5.4E-30 |
| 2943 | 62899.75    | cyclohexylmethylcarbamoyl chloride                                                                                                 | 190 | 58  | 5.4E-02 | 3.5E-01 | 2.1E-01 | 6.2  | 3.5E-06 | 3.5E-07 | 1.1E-07 | conf | conf | 9.2E+00 | 1.3E-01 | 4.6E+00 | -8.16  | 8.72  | -10.64 | -2.38 | 0.32 | 0.0% | 0.0% | 3.6E-26 |
| 2944 | 35786.84    | 4,5-dimethyl-2-(propan-2-ylidene)                                                                                                  | 154 | 53  | 6.3E-01 | 7.2E-01 | 2.1E-01 | 14.0 | 3.5E-06 | 3.5E-07 | 1.1E-07 | conf | conf | 9.2E+00 | 1.3E-01 | 4.7E+00 | -10.07 | 9.88  | -11.42 | -1.73 | 0.30 | 0.0% | 0.0% | 1.0E-35 |
| 2945 | 8243.07     | 3-(1-ethyl-2-oxo-1,2-dihydro-3H-benzothiazol-3-ylidene)-1,3,6-trisubstituted                                                       | 205 | 87  | 4.0E-03 | 4.0E-01 | 3.0E-02 | 14.0 | 3.5E-06 | 3.5E-07 | 6.6E-09 | conf | conf | 7.7E+00 | 1.1E-01 | 3.8E-01 | -8.22  | 8.44  | -10.01 | -0.21 | 0.72 | 0.0% | 0.0% | 8.5E-38 |
| 2946 | 927.628     | N,N-dimethylacetamide                                                                                                              | 101 | -71 | 6.2E-01 | 2.9E+04 | 3.1E+01 | 10.0 | 3.5E-06 | 3.5E-07 | 1.1E-07 | conf | conf | 9.2E+00 | 1.3E-01 | 4.7E+00 | -10.82 | 10.56 | -11.95 | -1.52 | 0.70 | 0.0% | 0.0% | 2.0E-50 |
| 2947 | 13360.419   | butylmethylamine                                                                                                                   | 101 | -54 | 3.4E-03 | 7.5E+04 | 6.2E+01 | 10.9 | 3.5E-06 | 3.5E-07 | 3.5E-07 | conf | conf | 1.0E+01 | 1.4E-01 | 5.3E+00 | -8.16  | 8.72  | -10.64 | -2.38 | 0.32 | 0.0% | 0.0% | 2.5E-48 |
| 2948 | 9915.42.7   | Unknow                                                                                                                             | 121 | 88  | 1.9E-04 | 2.1E-01 | 3.1E-01 | 0    | 3.5E-06 | 3.5E-07 | 1.1E-07 | conf | conf | 9.2E+00 | 1.3E-01 | 4.7E+00 | -8.16  | 8.72  | -10.64 | -2.38 | 0.32 | 0.0% | 0.0% | 3.6E-26 |
| 2949 | 8234.144    | 1,5-dimethyl-2-oxo-1,2-dihydro-3H-benzothiazol-3-ylidene)-1,3,6-trisubstituted                                                     | 205 | 47  | 2.0E-04 | 2.4E+04 | 9.2E+01 | 14.0 | 3.5E-06 | 3.5E-07 | 3.5E-07 | conf | conf | 9.2E+00 | 1.3E-01 | 4.7E+00 | -8.74  | 9.78  | -11.32 | -2.13 | 0.42 | 0.0% | 0.0% | 1.1E-39 |
| 2950 | 160280.108  | 4-(1-cyclopropanecarbonylmethyl)-2-methylpropanoate                                                                                | 260 | 107 | 4.4E-03 | 2.1E-01 | 8.1E-01 | 0    | 3.5E-06 | 3.5E-07 | 1.1E-07 | conf |      |         |         |         |        |       |        |       |      |      |      |         |





|      |              |                                                                                                                 |     |     |         |         |         |      |         |         |         |      |      |         |         |         |        |        |        |        |       |      |      |         |
|------|--------------|-----------------------------------------------------------------------------------------------------------------|-----|-----|---------|---------|---------|------|---------|---------|---------|------|------|---------|---------|---------|--------|--------|--------|--------|-------|------|------|---------|
| 3453 | 119-40-4     | 7-amino-4-hydroxy-naphthalene-2-sulphonic acid                                                                  | 315 | 228 | 1.76-11 | 2.06-10 | 3.16-02 | 0-4  | 3.56-06 | 3.56-07 | 1.16-07 | conf | conf | 9.26-01 | 1.36-02 | 4.76-01 | -8.60  | -9.67  | -11.56 | -11.21 | 0.27  | 0.00 | 0.00 | 8.26-42 |
| 3454 | 2022-85-7    | fluoropyr                                                                                                       | 120 | 89  | 2.02-04 | 2.52-03 | 1.16-02 | 0.3  | 3.56-06 | 3.56-07 | 1.16-07 | conf | conf | 9.26-01 | 1.36-02 | 4.76-01 | -8.60  | -9.67  | -11.56 | -11.21 | 0.27  | 0.00 | 0.00 | 7.56-50 |
| 3455 | 101-41-7     | methyl phenylacetate                                                                                            | 150 | -1  | 2.11-01 | 3.06-04 | 1.26-02 | 1.40 | 3.56-06 | 3.56-07 | 6.66-09 | conf | conf | 1.06-10 | 1.46-02 | 5.06-06 | -8.00  | -9.49  | -11.06 | -10.89 | 0.49  | 0.00 | 0.00 | 3.46-48 |
| 3456 | 61832-41-5   | n-methyl-1-(methoxybutyl)-2-nitrovinylamine                                                                     | 129 | 40  | 5.46-00 | 2.86-05 | 4.46-01 | 7.6  | 3.56-06 | 3.56-07 | 3.56-07 | conf | conf | 9.26-01 | 1.36-02 | 4.76-01 | -9.50  | -9.74  | -11.61 | -9.36  | 0.64  | 0.00 | 0.00 | 4.16-28 |
| 3457 | 53-64-9      | naftale                                                                                                         | 90  | 90  | 1.76-09 | 2.36-05 | 1.56-01 | 0.3  | 3.56-06 | 3.56-07 | 1.16-07 | conf | conf | 9.26-01 | 1.36-02 | 4.76-01 | -9.50  | -9.74  | -11.61 | -9.36  | 0.64  | 0.00 | 0.00 | 6.76-62 |
| 3458 | 94753-66-4   | 2-ethylhexyl-2-cyano-3-(4-methoxyphenyl)-3-phenylpropanoate                                                     | 392 | 199 | 6.66-08 | 2.56-02 | 9.16-06 | 1.40 | 3.56-06 | 3.56-07 | 3.56-07 | conf | conf | 6.96-01 | 9.66-03 | 3.46-01 | -9.50  | -9.55  | -11.55 | -12.31 | -4.84 | 0.79 | 0.00 | 7.06-27 |
| 3459 | 184022-27-2  | 678-409-4                                                                                                       | 332 | 71  | 4.66-02 | 1.46-02 | 2.56-08 | 1.40 | 3.56-06 | 3.56-07 | 3.56-07 | conf | conf | 6.96-01 | 8.86-03 | 3.16-01 | -11.21 | -11.50 | -11.99 | -13.35 | 0.73  | 0.00 | 0.00 | 2.56-35 |
| 3460 | 252385-02-2  | 2-(4-(4-ethoxyphenyl)-6-phenyl-1,3,5-triazin-2-yl)-2-phenol                                                     | 344 | 110 | 1.76-11 | 1.16-01 | 1.96-04 | 1.3  | 3.56-06 | 3.56-07 | 1.16-07 | conf | conf | 9.16-01 | 1.36-02 | 4.66-01 | -9.66  | -9.66  | -11.41 | -11.61 | 0.00  | 0.00 | 0.00 | 8.36-28 |
| 3461 | 1195231-90-4 | 2-methyl-1-nitrosophenylaminolactate-1-(3-ethoxyethyl)propylcarbamate                                           | 442 | 194 | 6.66-07 | 1.66-01 | 1.16-03 | 4.5  | 3.56-06 | 3.56-07 | 1.16-07 | conf | conf | 9.16-01 | 1.36-02 | 4.66-01 | -9.24  | -9.80  | -11.67 | -12.73 | 0.82  | 0.00 | 0.00 | 1.26-37 |
| 3462 | 378-44-9     | batemastat                                                                                                      | 212 | 77  | 1.76-12 | 1.16-01 | 2.56-02 | 1.3  | 3.56-06 | 3.56-07 | 1.16-07 | conf | conf | 9.26-01 | 1.36-02 | 4.76-01 | -9.50  | -9.74  | -11.61 | -9.36  | 0.64  | 0.00 | 0.00 | 2.46-47 |
| 3463 | 1624-02      | 3-methyl-1-(2,3-dihydro-1H-imidazol-1-yl)-tri-1-en-1-ol                                                         | 248 | 141 | 2.26-04 | 1.86-01 | 9.86-03 | 1.40 | 3.56-06 | 3.56-07 | 6.66-09 | conf | conf | 9.16-01 | 1.36-02 | 4.66-01 | -9.67  | -9.40  | -11.07 | -12.48 | 0.10  | 0.00 | 0.00 | 1.36-34 |
| 3464 | 3439-73-4    | 4-(4-chlorobenzoylthio)phenylmethanone                                                                          | 261 | 120 | 6.36-04 | 5.36-00 | 9.16-03 | 0    | 3.56-06 | 3.56-07 | 1.16-07 | conf | conf | 9.26-01 | 1.36-02 | 4.76-01 | -9.78  | -10.27 | -12.31 | -12.54 | 0.19  | 0.00 | 0.00 | 1.06-44 |
| 3465 | 88952-12-6   | 3-(9-ethylthio)acetylaldehyde                                                                                   | 312 | 120 | 1.26-04 | 6.86-01 | 1.16-02 | 1.40 | 3.56-06 | 3.56-07 | 1.16-07 | conf | conf | 9.26-01 | 1.36-02 | 4.76-01 | -9.50  | -9.41  | -11.41 | -11.61 | 0.00  | 0.00 | 0.00 | 3.46-28 |
| 3466 | 846-40-0     | boldenone                                                                                                       | 286 | 145 | 1.66-06 | 1.16-01 | 1.16-03 | 1.40 | 3.56-06 | 3.56-07 | 1.16-07 | conf | conf | 9.06-01 | 1.36-02 | 4.66-01 | -9.80  | -10.74 | -12.34 | -11.91 | 0.46  | 0.00 | 0.00 | 1.76-50 |
| 3467 | 58861-48-6   | 2-(4-fluorophenyl)propane                                                                                       | 178 | 62  | 4.06-01 | 2.16-01 | 6.06-03 | 0    | 3.56-06 | 3.56-07 | 3.56-07 | conf | conf | 9.26-01 | 1.36-02 | 4.76-01 | -9.67  | -10.40 | -12.34 | -12.53 | 0.12  | 0.00 | 0.00 | 7.06-45 |
| 3468 | 52086-46-1   | 1,1,1-trimethoxy-2-methylpropane                                                                                | 164 | 125 | 3.06-03 | 3.86-01 | 1.16-02 | 1.40 | 3.56-06 | 3.56-07 | 1.16-07 | conf | conf | 9.26-01 | 1.36-02 | 4.76-01 | -9.50  | -9.74  | -11.61 | -9.36  | 0.64  | 0.00 | 0.00 | 5.46-71 |
| 3469 | 3889-09-1    | 3-(10-thiano-9(10H)-anthracen-9-ylidene)acetaldehyde                                                            | 260 | 135 | 2.66-04 | 1.56-01 | 6.66-03 | 1.40 | 3.56-06 | 3.56-07 | 3.56-07 | conf | conf | 9.26-01 | 1.36-02 | 4.76-01 | -11.11 | -10.90 | -12.46 | -11.33 | 0.52  | 0.00 | 0.00 | 7.06-21 |
| 3470 | 50272-1-7    | 1-(5-ethoxy-2H-pyrid-2-yl)phenylmethanone                                                                       | 312 | 130 | 1.76-18 | 5.26-02 | 6.56-02 | 1.40 | 3.56-06 | 3.56-07 | 1.16-07 | conf | conf | 9.26-01 | 1.36-02 | 4.76-01 | -10.87 | -11.09 | -12.49 | -11.51 | 0.55  | 0.00 | 0.00 | 1.06-45 |
| 3471 | 87428-99-7   | Benzy N-(2-benzoylthio)phenylmethanone                                                                          | 309 | 194 | 3.56-07 | 1.16-01 | 4.66-03 | 1.28 | 3.56-06 | 3.56-07 | 3.56-07 | conf | conf | 9.26-01 | 1.36-02 | 4.76-01 | -9.86  | -10.77 | -12.38 | -12.70 | 0.67  | 0.00 | 0.00 | 8.96-44 |
| 3472 | 927426-92-1  | (66,68,118,16)-fluoro-17-hydroxy-16-methyl-3,20-dioxo-11-β-epoxyergane-1,4-dien-21-yl benzoate                  | 495 | 242 | 1.36-12 | 1.76-02 | 3.46-03 | 1.30 | 3.56-06 | 3.56-07 | 3.56-07 | conf | conf | 9.26-01 | 1.36-02 | 4.76-01 | -9.69  | -10.73 | -12.32 | -12.01 | 0.15  | 0.00 | 0.00 | 2.26-49 |
| 3473 | 92336-15-3   | N-[3-(R)-1-(4-benzyl-4-methylpiperidin-3-yl)-2-chloro-N-methyl-3-(6-propyl)-3-ethylurea]-4-amine                | 370 | 234 | 1.46-09 | 5.16-01 | 2.96-03 | 1.40 | 3.56-06 | 3.56-07 | 6.66-09 | conf | conf | 9.16-01 | 1.36-02 | 4.56-01 | -9.48  | -9.43  | -11.03 | -11.39 | 0.30  | 0.00 | 0.00 | 5.56-28 |
| 3474 | 27566-05-8   | 4-(2-benzamyl)azobenzene                                                                                        | 241 | 125 | 1.86-04 | 1.86-03 | 2.86-08 | 7.7  | 3.56-06 | 3.56-07 | 1.16-07 | conf | conf | 9.26-01 | 1.36-02 | 4.76-01 | -9.64  | -10.62 | -12.35 | -12.81 | 0.27  | 0.00 | 0.00 | 1.46-42 |
| 3475 | 18109-08-9   | butaminate                                                                                                      | 311 | 115 | 6.56-03 | 3.06-01 | 2.56-02 | 1.40 | 3.56-06 | 3.56-07 | 6.66-09 | conf | conf | 9.16-01 | 1.36-02 | 4.66-01 | -9.81  | -9.53  | -11.12 | -12.37 | 0.80  | 0.00 | 0.00 | 4.46-36 |
| 3476 | 2321-07-5    | 2-6-hydroxy-3-oxo-3H-xanthen-9-ylbenzoic acid                                                                   | 322 | 227 | 2.46-12 | 2.56-03 | 2.76-03 | 0.9  | 3.56-06 | 3.56-07 | 3.56-07 | conf | conf | 9.26-01 | 1.36-02 | 4.76-01 | -9.67  | -10.71 | -12.31 | -12.07 | 0.00  | 0.00 | 0.00 | 1.56-46 |
| 3477 | 7148-78-9    | 3,3-dihydroxy-1-propenylbenzene                                                                                 | 206 | 23  | 8.16-01 | 6.96-02 | 1.56-03 | 1.40 | 3.56-06 | 3.56-07 | 3.56-07 | conf | conf | 9.26-01 | 1.36-02 | 4.76-01 | -11.04 | -10.82 | -12.42 | -12.87 | 0.54  | 0.00 | 0.00 | 2.16-27 |
| 3478 | 1132940-51-1 | 1-tert-butyl-3,5-dioxo-2-methoxybenzene                                                                         | 126 | 105 | 4.26-05 | 1.56-01 | 2.16-06 | 1.40 | 3.56-06 | 3.56-07 | 3.56-07 | conf | conf | 6.86-01 | 8.96-03 | 3.16-01 | -11.76 | -11.65 | -12.67 | -13.03 | 0.12  | 0.00 | 0.00 | 1.96-43 |
| 3479 | 197721-70-3  | 5-hydroxypropanone                                                                                              | 385 | 210 | 3.96-10 | 3.46-01 | 1.06-03 | 1.40 | 3.56-06 | 3.56-07 | 3.56-07 | conf | conf | 9.26-01 | 1.36-02 | 4.76-01 | -9.61  | -10.66 | -12.31 | -12.88 | 0.29  | 0.00 | 0.00 | 2.76-51 |
| 3480 | 15675-236-2  | 6-BROMO-4-PHENYLCYCLOHEXAN-2-ONE                                                                                | 303 | 145 | 4.26-05 | 2.56-03 | 9.56-05 | 1.40 | 3.56-06 | 3.56-07 | 6.66-09 | conf | conf | 9.16-01 | 1.36-02 | 4.66-01 | -9.36  | -9.40  | -11.05 | -12.85 | 0.51  | 0.00 | 0.00 | 5.96-32 |
| 3481 | 5292-53-5    | diethyl (phenylthio)phenylmethanone                                                                             | 248 | 3   | 1.26-01 | 6.06-01 | 8.76-02 | 1.40 | 3.56-06 | 3.56-07 | 6.66-09 | conf | conf | 9.16-01 | 1.36-02 | 4.66-01 | -10.10 | -9.83  | -11.29 | -12.38 | 0.26  | 0.00 | 0.00 | 3.16-36 |
| 3482 | 60803-26-1   | 2-tert-butyl-4,6-disulphophenol                                                                                 | 402 | 123 | 4.06-05 | 2.46-01 | 5.56-05 | 7.8  | 3.56-06 | 3.56-07 | 1.16-07 | conf | conf | 7.86-01 | 1.06-02 | 3.66-01 | -11.63 | -11.79 | -12.00 | -12.96 | 0.31  | 0.00 | 0.00 | 6.26-47 |
| 3483 | 16633-62-3   | 2-phenylmethyl-2-cyanosuccinate                                                                                 | 31  | 7   | 1.76-02 | 1.16-01 | 2.56-02 | 1.40 | 3.56-06 | 3.56-07 | 1.16-07 | conf | conf | 9.26-01 | 1.36-02 | 4.76-01 | -9.80  | -10.44 | -12.47 | -12.27 | 0.00  | 0.00 | 0.00 | 2.26-45 |
| 3484 | 575-61-1     | 3-benzylbenzenesulphide                                                                                         | 222 | 121 | 6.06-04 | 6.26-01 | 5.06-02 | 1.40 | 3.56-06 | 3.56-07 | 3.56-07 | conf | conf | 9.26-01 | 1.36-02 | 4.76-01 | -10.29 | -10.66 | -12.37 | -12.70 | 0.40  | 0.00 | 0.00 | 1.16-41 |
| 3485 | 84852-49-3   | [[[bis(phenylthio)imino]bis[diethylenetriamino]bis[ethylenetriamino]]bis[terakis(hydroxyacetate, potassium salt | 612 | 87  | 9.96-03 | 4.26-01 | 3.66-02 | 0    | 3.56-06 | 3.56-07 | 6.66-09 | conf | conf | 7.86-01 | 1.06-02 | 3.76-01 | -9.59  | -9.43  | -11.10 | -12.39 | 1.21  | 0.00 | 0.00 | 3.06-53 |
| 3486 | 101-97-1     | 1-phenylacetate                                                                                                 | 120 | 11  | 1.26-01 | 1.16-01 | 1.16-02 | 1.40 | 3.56-06 | 3.56-07 | 1.16-07 | conf | conf | 9.26-01 | 1.36-02 | 4.76-01 | -9.50  | -9.41  | -11.41 | -11.61 | 0.00  | 0.00 | 0.00 | 3.46-43 |
| 3487 | 88690-46-5   | 4-(decafluorobenzoyl)acetic acid                                                                                | 292 | 151 | 3.16-05 | 1.16-02 | 2.56-05 | 4.2  | 3.56-06 | 3.56-07 | 3.56-07 | conf | conf | 9.36-01 | 1.36-02 | 4.86-01 | -9.89  | -10.40 | -12.36 | -11.59 | 0.95  | 0.00 | 0.00 | 9.76-54 |
| 3488 | 908146-87-8  | Diethyl 4-(4'-oxybutyl)benzoate-1-L-glutamate                                                                   | 377 | 444 | 4.66-08 | 1.76-01 | 5.16-02 | 1.40 | 3.56-06 | 3.56-07 | 6.66-09 | conf | conf | 9.26-01 | 1.36-02 | 4.76-01 | -9.50  | -9.57  | -11.03 | -12.25 | 0.80  | 0.00 | 0.00 | 2.56-36 |
| 3489 | 92878-80-0   | 618-883                                                                                                         | 115 | 126 | 1.16-05 | 1.26-02 | 4.86-04 | 1.40 | 3.56-06 | 3.56-07 | 1.16-07 | conf | conf | 9.26-01 | 1.36-02 | 4.76-01 | -9.50  | -9.74  | -11.61 | -9.36  | 0.64  | 0.00 | 0.00 | 1.06-46 |
| 3490 | 117231-64-1  | 2-amino-3-propyl-4-(4-((4-fluorobenzyl)carbamoyl)-1-methyl-6-oxo-1,4-dihydropyridin-5-yl) alivate               | 418 | 253 | 7.06-11 | 3.76-03 | 3.36-02 | 1.26 | 3.56-06 | 3.56-07 | 3.56-07 | conf | conf | 9.26-01 | 1.36-02 | 4.76-01 | -9.52  | -10.59 | -12.30 | -13.05 | 0.64  | 0.00 | 0.00 | 3.46-40 |
| 3491 | 145438-09-9  | 604-964-1                                                                                                       | 212 | 105 | 4.26-05 | 2.56-03 | 9.56-05 | 1.40 | 3.56-06 | 3.56-07 | 6.66-09 | conf | conf | 9.16-01 | 1.36-02 | 4.66-01 | -9.36  | -9.40  | -11.05 | -12.85 | 0.51  | 0.00 | 0.00 | 5.96-32 |
| 3492 | 76-89-1      | methyl benzoate                                                                                                 | 242 | 110 | 1.76-04 | 1.16-01 | 1.66-02 | 1.40 | 3.56-06 | 3.56-07 | 3.56-07 | conf | conf | 9.26-01 | 1.36-02 | 4.76-01 | -9.65  | -10.58 | -12.36 | -12.40 | 0.32  | 0.00 | 0.00 | 1.06-31 |
| 3493 | 261933-36-0  | 6-iodo indazole                                                                                                 | 126 | 110 | 2.36-02 | 4.56-02 | 2.16-02 | 1.40 | 3.56-06 | 3.56-07 | 3.56-07 | conf | conf | 9.26-01 | 1.36-02 | 4.76-01 | -9.65  | -10.40 | -12.33 | -12.41 | 0.28  | 0.00 | 0.00 | 4.46-32 |
| 3494 | 151-97-6     | fluorocitrate                                                                                                   | 236 | 120 | 1.26-01 | 5.46-01 | 1.16-02 | 1.40 | 3.56-06 | 3.56-07 | 1.16-07 | conf | conf | 9.26-01 | 1.36-02 | 4.76-01 | -9.50  | -9.41  | -11.41 | -11.61 | 0.00  | 0.00 | 0.00 | 3.46-28 |
| 3495 | 877399-00-3  | 5-Bromo-3-[1R]-2,6-dichloro-3-fluorophenylethoxypropyl-2-amine                                                  | 388 | 172 | 1.76-01 | 4.36-01 | 1.36-05 | 1.40 | 3.56-06 | 3.56-07 | 3.56-07 | conf | conf | 9.16-01 | 1.36-02 | 4.66-01 | -10.91 | -11.01 | -12.41 | -12.66 | 1.08  | 0.00 | 0.00 | 2.16-44 |
| 3496 | 61010-04-6   | 2-chloro-3-hydroxyoctamethylbenzocyclohexene-1-one-1-carbaldehyde                                               | 173 | 74  | 7.26-03 | 8.26-03 | 7.96-01 | 1.40 | 3.56-06 | 3.56-07 | 1.16-07 | conf | conf | 9.26-01 | 1.36-02 | 4.76-01 | -9.85  | -10.67 | -12.36 | -12.77 | 0.74  | 0.00 | 0.00 | 2.46-48 |
| 3497 | 146328-05-4  | 2-methylcyclohex-1,4-diene                                                                                      | 160 | 173 | 1.26-01 | 2.46-01 | 2.46-01 | 0    | 3.56-06 | 3.56-07 | 3.56-07 | conf | conf | 9.26-01 | 1.36-02 | 4.76-01 | -9.50  | -9.74  | -11.61 | -9.36  | 0.64  | 0.00 | 0.00 | 2.46-67 |
| 3498 | 18656-19-1   | 2-chloro-N-cyclohexyl-N-(cyclohexylcarbamoyl)acetaldehyde                                                       | 301 | 198 | 3.16-07 | 4.46-01 | 6.26-04 | 0.9  |         |         |         |      |      |         |         |         |        |        |        |        |       |      |      |         |



[illegible]

[illegible]

|      |              |                                                                                                                  |      |    |         |         |         |      |         |         |         |      |      |         |         |         |       |      |       |       |      |
|------|--------------|------------------------------------------------------------------------------------------------------------------|------|----|---------|---------|---------|------|---------|---------|---------|------|------|---------|---------|---------|-------|------|-------|-------|------|
| 4169 | 68647-86-9   | Charcoal, coconut shell                                                                                          | 2328 | 87 | 9.9E-03 | 1.5E-03 | 3.0E-02 | 1.40 | 3.5E-06 | 1.3E-07 | 6.6E-09 | conf | conf | 1.0E-04 | 1.5E-02 | 5.2E-03 | -5.01 | 5.31 | 6.97  | -1.84 | 0.64 |
| 4170 | 68515-40-0   | 1,2-Benzenedithiocarbonyl acid, di-C9-10-branched alkyl esters, C9-rich                                          | 2328 | 87 | 9.9E-03 | 1.5E-03 | 3.0E-02 | 1.40 | 3.5E-06 | 1.3E-07 | 6.6E-09 | conf | conf | 1.0E-04 | 1.4E-02 | 5.2E-03 | -5.01 | 5.31 | 6.97  | -1.84 | 0.64 |
| 4171 | 67017-06-8   | Fatty acids, C14-18 and C18-unsatd.                                                                              | 2328 | 87 | 9.9E-03 | 1.5E-03 | 3.0E-02 | 1.40 | 3.5E-06 | 1.3E-07 | 6.6E-09 | conf | conf | 1.0E-04 | 1.4E-02 | 5.0E-03 | -5.03 | 5.33 | 6.99  | -0.33 | 0.38 |
| 4172 | 90640-84-9   | Crotonic acid, azeotrophenic fraction                                                                            | 2328 | 87 | 9.9E-03 | 1.5E-03 | 3.0E-02 | 1.40 | 3.5E-06 | 1.3E-07 | 6.6E-09 | conf | conf | 9.9E-03 | 1.4E-02 | 4.9E-03 | -5.03 | 5.34 | 6.99  | -2.06 | 0.95 |
| 4173 | 68262-94-1   | Alcohols, C8-10-unsat, C9-rich                                                                                   | 2328 | 87 | 9.9E-03 | 1.5E-03 | 3.0E-02 | 1.40 | 3.5E-06 | 1.3E-07 | 6.6E-09 | conf | conf | 9.9E-03 | 1.3E-02 | 4.8E-03 | -5.04 | 5.34 | 6.99  | -2.06 | 0.95 |
| 4174 | 66071-94-1   | Con. steep liquor                                                                                                | 2328 | 87 | 9.9E-03 | 1.5E-03 | 3.0E-02 | 1.40 | 3.5E-06 | 1.3E-07 | 6.6E-09 | conf | conf | 9.6E-03 | 1.3E-02 | 4.8E-03 | -5.04 | 5.35 | -7.00 | -1.23 | 0.56 |
| 4175 | 68425-17-2   | Synaps, con, hydrogenated                                                                                        | 2328 | 87 | 9.9E-03 | 1.5E-03 | 3.0E-02 | 1.40 | 3.5E-06 | 1.3E-07 | 6.6E-09 | conf | conf | 9.5E-03 | 1.3E-02 | 4.8E-03 | -5.05 | 5.35 | -7.01 | -1.84 | 0.64 |
| 4176 | 68037-02-4   | Dec-1-ene, homopolymer, hydrogenated Dec-1-ene, oligomers, hydrogenated                                          | 2328 | 87 | 9.9E-03 | 1.5E-03 | 3.0E-02 | 1.40 | 3.5E-06 | 1.3E-07 | 6.6E-09 | conf | conf | 9.3E-03 | 1.3E-02 | 4.7E-03 | -5.06 | 5.37 | -7.02 | -1.84 | 0.64 |
| 4177 | 68333-89-1   | Benzene, (1-methylthioethyl)-, oxidized, polyphenyl residues                                                     | 2328 | 87 | 9.9E-03 | 1.5E-03 | 3.0E-02 | 1.40 | 3.5E-06 | 1.3E-07 | 6.6E-09 | conf | conf | 9.2E-03 | 1.3E-02 | 4.6E-03 | -5.06 | 5.37 | -7.02 | -1.07 | 0.64 |
| 4178 | 85335-86-9   | Alkanes, C14-17, chloro                                                                                          | 2328 | 87 | 9.9E-03 | 1.5E-03 | 3.0E-02 | 1.40 | 3.5E-06 | 1.3E-07 | 6.6E-09 | conf | conf | 9.1E-03 | 1.3E-02 | 4.5E-03 | -5.07 | 5.38 | -7.04 | -2.84 | 1.40 |
| 4179 | 64742-91-2   | Disulfates (petroleum)-, steam-cracked                                                                           | 2328 | 87 | 9.9E-03 | 1.5E-03 | 3.0E-02 | 1.40 | 3.5E-06 | 1.3E-07 | 6.6E-09 | conf | conf | 8.8E-03 | 1.2E-02 | 4.4E-03 | -5.08 | 5.39 | -7.04 | -2.70 | 0.22 |
| 4180 | 103116-84-1  | Tar, brown, cool, low-temp.                                                                                      | 2328 | 87 | 9.9E-03 | 1.5E-03 | 3.0E-02 | 1.40 | 3.5E-06 | 1.3E-07 | 6.6E-09 | conf | conf | 8.7E-03 | 1.2E-02 | 4.3E-03 | -5.09 | 5.40 | -7.05 | -1.99 | 0.64 |
| 4181 | 9049-71-2    | Sucrose, propanolated                                                                                            | 2328 | 87 | 9.9E-03 | 1.5E-03 | 3.0E-02 | 1.40 | 3.5E-06 | 1.3E-07 | 6.6E-09 | conf | conf | 8.5E-03 | 1.2E-02 | 4.3E-03 | -5.10 | 5.48 | -7.10 | -1.84 | 0.64 |
| 4182 | 51000-52-3   | vinyl neodecanoate                                                                                               | 2328 | 87 | 9.9E-03 | 1.5E-03 | 3.0E-02 | 1.40 | 3.5E-06 | 1.3E-07 | 6.6E-09 | conf | conf | 8.3E-03 | 1.2E-02 | 4.2E-03 | -5.11 | 5.41 | -7.07 | -2.68 | 0.91 |
| 4183 | 74037-83-8   | Alcohols, C12-13-branched and linear                                                                             | 2328 | 87 | 9.9E-03 | 1.5E-03 | 3.0E-02 | 1.40 | 3.5E-06 | 1.3E-07 | 6.6E-09 | conf | conf | 8.0E-03 | 1.1E-02 | 4.0E-03 | -5.12 | 5.43 | -7.08 | -1.04 | 0.64 |
| 4184 | 102242-12-4  | Fatty acids, C8-24 and C8-24-unsatd. Me esters, distn. residues                                                  | 2328 | 87 | 9.9E-03 | 1.5E-03 | 3.0E-02 | 1.40 | 3.5E-06 | 1.3E-07 | 6.6E-09 | conf | conf | 7.9E-03 | 1.1E-02 | 3.9E-03 | -5.12 | 5.43 | -7.10 | -1.04 | 0.64 |
| 4185 | 52625-13-5   | D-glucitol, propionated                                                                                          | 2328 | 87 | 9.9E-03 | 1.5E-03 | 3.0E-02 | 1.40 | 3.5E-06 | 1.3E-07 | 6.6E-09 | conf | conf | 7.6E-03 | 1.1E-02 | 3.8E-03 | -5.14 | 5.45 | -7.10 | -1.84 | 0.64 |
| 4186 | 92128-68-2   | Hydrocarbons, C5, ethylene-manuf., by-product, hydrogenated                                                      | 2328 | 87 | 9.9E-03 | 1.5E-03 | 3.0E-02 | 1.40 | 3.5E-06 | 1.3E-07 | 6.6E-09 | conf | conf | 7.4E-03 | 1.1E-02 | 3.8E-03 | -5.15 | 5.46 | -7.11 | -1.93 | 0.38 |
| 4187 | 25791-86-2   | Glycerol, propionated                                                                                            | 2328 | 87 | 9.9E-03 | 1.5E-03 | 3.0E-02 | 1.40 | 3.5E-06 | 1.3E-07 | 6.6E-09 | conf | conf | 7.4E-03 | 1.0E-02 | 3.7E-03 | -5.16 | 5.46 | -7.11 | -1.84 | 0.64 |
| 4188 | 71089-39-4   | Fatty acids, C16-18 and C18-unsatd., dimerized                                                                   | 2328 | 87 | 9.9E-03 | 1.5E-03 | 3.0E-02 | 1.40 | 3.5E-06 | 1.3E-07 | 6.6E-09 | conf | conf | 7.2E-03 | 1.0E-02 | 3.6E-03 | -5.17 | 5.48 | -7.13 | -0.07 | 1.05 |
| 4189 | 84649-86-3   | Amines, C12-14-alkyldimethyl                                                                                     | 2328 | 87 | 9.9E-03 | 1.5E-03 | 3.0E-02 | 1.40 | 3.5E-06 | 1.3E-07 | 6.6E-09 | conf | conf | 7.1E-03 | 9.8E-03 | 3.5E-03 | -5.18 | 5.48 | -7.14 | -1.88 | 0.66 |
| 4190 | 8013-07-8    | Soybean oil, epoxidized                                                                                          | 2328 | 87 | 9.9E-03 | 1.5E-03 | 3.0E-02 | 1.40 | 3.5E-06 | 1.3E-07 | 6.6E-09 | conf | conf | 6.7E-03 | 9.4E-03 | 3.4E-03 | -5.20 | 5.50 | -7.16 | -0.96 | 0.64 |
| 4191 | 61388-89-4   | Fatty acids, C18-unsatd., dimers                                                                                 | 2328 | 87 | 9.9E-03 | 1.5E-03 | 3.0E-02 | 1.40 | 3.5E-06 | 1.3E-07 | 6.6E-09 | conf | conf | 6.1E-03 | 8.3E-03 | 3.1E-03 | -5.24 | 5.55 | -7.20 | -1.84 | 0.64 |
| 4192 | 91959-60-7   | Ethers, C5-6-branched alkyl                                                                                      | 2328 | 87 | 9.9E-03 | 1.5E-03 | 3.0E-02 | 1.40 | 3.5E-06 | 1.3E-07 | 6.6E-09 | conf | conf | 5.9E-03 | 8.2E-03 | 2.7E-03 | -5.26 | 5.57 | -7.22 | -0.96 | 0.64 |
| 4193 | 6837-58-6    | Pitch, petroleum, aro.                                                                                           | 2328 | 87 | 9.9E-03 | 1.5E-03 | 3.0E-02 | 1.40 | 3.5E-06 | 1.3E-07 | 6.6E-09 | conf | conf | 5.6E-03 | 7.8E-03 | 2.8E-03 | -5.28 | 5.59 | -7.24 | -1.27 | 0.64 |
| 4194 | 68477-35-0   | Disulfates (petroleum)-, C8-6, piperylene-rich                                                                   | 2328 | 87 | 9.9E-03 | 1.5E-03 | 3.0E-02 | 1.40 | 3.5E-06 | 1.3E-07 | 6.6E-09 | conf | conf | 5.5E-03 | 7.6E-03 | 2.7E-03 | -5.29 | 5.60 | -7.25 | -1.93 | 0.38 |
| 4195 | 42978-66-5   | 1-methyl-1,2-ethanediol(bis(methyl-2,1-ethanediol) diacrylate)                                                   | 2328 | 87 | 9.9E-03 | 1.5E-03 | 3.0E-02 | 1.40 | 3.5E-06 | 1.3E-07 | 6.6E-09 | conf | conf | 5.4E-03 | 7.6E-03 | 2.7E-03 | -5.29 | 5.60 | -7.25 | -1.47 | 0.61 |
| 4196 | 9003-29-6    | Butene, homopolymer [products derived from either/or But-1-ene/But-2-ene]                                        | 2328 | 87 | 9.9E-03 | 1.5E-03 | 3.0E-02 | 1.40 | 3.5E-06 | 1.3E-07 | 6.6E-09 | conf | conf | 5.3E-03 | 7.4E-03 | 2.6E-03 | -5.30 | 5.61 | -7.26 | -4.28 | 0.64 |
| 4197 | 68015-38-8   | Cyclohexane, oxidized, alkylated                                                                                 | 2328 | 87 | 9.9E-03 | 1.5E-03 | 3.0E-02 | 1.40 | 3.5E-06 | 1.3E-07 | 6.6E-09 | conf | conf | 5.2E-03 | 7.2E-03 | 2.6E-03 | -5.31 | 5.62 | -7.27 | -0.33 | 0.31 |
| 4198 | 67701-07-7   | Fatty acids, C18-18 and C18-unsatd.                                                                              | 2328 | 87 | 9.9E-03 | 1.5E-03 | 3.0E-02 | 1.40 | 3.5E-06 | 1.3E-07 | 6.6E-09 | conf | conf | 5.0E-03 | 7.0E-03 | 2.5E-03 | -5.32 | 5.63 | -7.28 | -1.51 | 0.64 |
| 4199 | 8006-64-2    | Turpentine oil                                                                                                   | 2328 | 87 | 9.9E-03 | 1.5E-03 | 3.0E-02 | 1.40 | 3.5E-06 | 1.3E-07 | 6.6E-09 | conf | conf | 4.9E-03 | 6.8E-03 | 2.5E-03 | -5.34 | 5.64 | -7.29 | -1.80 | 0.27 |
| 4200 | 85586-07-8   | Sulfuric acid, mono-C12-14-alkyl esters, sodium salts                                                            | 2328 | 87 | 9.9E-03 | 1.5E-03 | 3.0E-02 | 1.40 | 3.5E-06 | 1.3E-07 | 6.6E-09 | conf | conf | 4.9E-03 | 6.8E-03 | 2.4E-03 | -5.34 | 5.64 | -7.30 | -2.09 | 0.57 |
| 4201 | 84961-70-6   | Benzene, mono-C12-14-alkyl derivs., distn. residues                                                              | 2328 | 87 | 9.9E-03 | 1.5E-03 | 3.0E-02 | 1.40 | 3.5E-06 | 1.3E-07 | 6.6E-09 | conf | conf | 4.9E-03 | 6.8E-03 | 2.4E-03 | -5.34 | 5.65 | -7.30 | -1.84 | 0.64 |
| 4202 | 274630-0-0   | Isopropylidene-1,3                                                                                               | 2328 | 87 | 9.9E-03 | 1.5E-03 | 3.0E-02 | 1.40 | 3.5E-06 | 1.3E-07 | 6.6E-09 | conf | conf | 4.8E-03 | 6.7E-03 | 2.4E-03 | -5.35 | 5.65 | -7.31 | -1.84 | 0.64 |
| 4203 | 846502-0-2   | Disulfates (coal tar), benzole fraction                                                                          | 2328 | 87 | 9.9E-03 | 1.5E-03 | 3.0E-02 | 1.40 | 3.5E-06 | 1.3E-07 | 6.6E-09 | conf | conf | 4.6E-03 | 6.5E-03 | 2.3E-03 | -5.36 | 5.67 | -7.32 | -1.88 | 0.38 |
| 4204 | 85566-29-3   | Disulfates, C8-18, Me esters                                                                                     | 2328 | 87 | 9.9E-03 | 1.5E-03 | 3.0E-02 | 1.40 | 3.5E-06 | 1.3E-07 | 6.6E-09 | conf | conf | 4.5E-03 | 6.3E-03 | 2.2E-03 | -5.37 | 5.68 | -7.33 | -1.99 | 0.73 |
| 4205 | 8002-26-8    | Resin acids and Resin acids, esters with pentaerythritol                                                         | 2328 | 87 | 9.9E-03 | 1.5E-03 | 3.0E-02 | 1.40 | 3.5E-06 | 1.3E-07 | 6.6E-09 | conf | conf | 4.3E-03 | 6.2E-03 | 2.0E-03 | -5.42 | 5.72 | -7.38 | -2.18 | 0.63 |
| 4206 | 846503-0-3   | Disulfates (coal tar), light oils                                                                                | 2328 | 87 | 9.9E-03 | 1.5E-03 | 3.0E-02 | 1.40 | 3.5E-06 | 1.3E-07 | 6.6E-09 | conf | conf | 4.5E-03 | 6.2E-03 | 2.2E-03 | -5.38 | 5.68 | -7.34 | -1.96 | 0.64 |
| 4207 | 151074-79-9  | Alcohols, C12-13, branched and linear, ethoxylated, sulfates, sodium salts                                       | 2328 | 87 | 9.9E-03 | 1.5E-03 | 3.0E-02 | 1.40 | 3.5E-06 | 1.3E-07 | 6.6E-09 | conf | conf | 4.5E-03 | 6.2E-03 | 2.2E-03 | -5.38 | 5.68 | -7.34 | -1.96 | 0.64 |
| 4208 | 68937-75-7   | Fatty acids, C8-20                                                                                               | 2328 | 87 | 9.9E-03 | 1.5E-03 | 3.0E-02 | 1.40 | 3.5E-06 | 1.3E-07 | 6.6E-09 | conf | conf | 4.4E-03 | 6.1E-03 | 2.2E-03 | -5.38 | 5.69 | -7.34 | -2.01 | 0.66 |
| 4209 | 972803-86    | Dodecane, hydrogenation products                                                                                 | 2328 | 87 | 9.9E-03 | 1.5E-03 | 3.0E-02 | 1.40 | 3.5E-06 | 1.3E-07 | 6.6E-09 | conf | conf | 4.3E-03 | 6.0E-03 | 2.1E-03 | -5.39 | 5.70 | -7.35 | -3.76 | 1.03 |
| 4210 | 91051-01-3   | Fatty acids, C16-18, zinc salts                                                                                  | 2328 | 87 | 9.9E-03 | 1.5E-03 | 3.0E-02 | 1.40 | 3.5E-06 | 1.3E-07 | 6.6E-09 | conf | conf | 4.3E-03 | 6.0E-03 | 2.1E-03 | -5.40 | 5.70 | -7.36 | -1.84 | 0.64 |
| 4211 | 1234684-02-1 | 1234684-02-0                                                                                                     | 2328 | 87 | 9.9E-03 | 1.5E-03 | 3.0E-02 | 1.40 | 3.5E-06 | 1.3E-07 | 6.6E-09 | conf | conf | 4.3E-03 | 6.0E-03 | 2.1E-03 | -5.40 | 5.70 | -7.36 | -0.26 | 0.64 |
| 4212 | 26789-86-1   | 1,2-Dithio-2,2-methylthio-2,2-hydroxyethyl-N,N-dimethyl-, esters with C16-18 and C18-unsatd. fatty acids, chloro | 2328 | 87 | 9.9E-03 | 1.5E-03 | 3.0E-02 | 1.40 | 3.5E-06 | 1.3E-07 | 6.6E-09 | conf | conf | 4.1E-03 | 5.7E-03 | 2.0E-03 | -5.42 | 5.72 | -7.38 | -1.03 | 0.86 |
| 4213 | 107184-43-3  | Ethanolamine, 2-hydroxy-N-(2-hydroxyethyl)-N,N-dimethyl-, esters with C16-18 and C18-unsatd. fatty acids, chloro | 2328 | 87 | 9.9E-03 | 1.5E-03 | 3.0E-02 | 1.40 | 3.5E-06 | 1.3E-07 | 6.6E-09 | conf | conf | 4.1E-03 | 5.7E-03 | 2.0E-03 | -5.42 | 5.72 | -7.38 | -1.03 | 0.86 |
| 4214 | 34590-84-8   | Fatty acids, C12-14 and C18-unsatd., 2-ethoxyethyl esters, sodium salts                                          | 2328 | 87 | 9.9E-03 | 1.5E-03 | 3.0E-02 | 1.40 | 3.5E-06 | 1.3E-07 | 6.6E-09 | conf | conf | 4.0E-03 | 5.5E-03 | 2.0E-03 | -5.43 | 5.74 | -7.39 | -0.71 | 0.48 |
| 4215 | 65997-03-7   | Fatty acids, tall oil, low-boiling                                                                               | 2328 | 87 | 9.9E-03 | 1.5E-03 | 3.0E-02 | 1.40 | 3.5E-06 | 1.3E-07 | 6.6E-09 | conf | conf | 3.9E-03 | 5.4E-03 | 1.9E-03 | -5.45 | 5.75 | -7.40 | -1.05 | 1.05 |
| 4216 | 97489-15-1   | Sulfuric acid, C14-17-sev-alkane, sodium salts                                                                   | 2328 | 87 | 9.9E-03 | 1.5E-03 | 3.0E-02 | 1.40 | 3.5E-06 | 1.3E-07 | 6.6E-09 | conf | conf | 3.8E-03 | 5.3E-03 | 1.9E-03 | -5.45 | 5.75 | -7.40 | -1.70 | 0.54 |
| 4217 | 25666-26-6   | 4-Methylpentenyl glycidylates, oligomers                                                                         | 2328 | 87 | 9.9E-03 | 1.5E-03 | 3.0E-02 | 1.40 | 3.5E-06 | 1.3E-07 | 6.6E-09 | conf | conf | 3.7E-03 | 5.2E-03 | 1.9E-03 | -5.46 | 5.77 | -7.42 | -0.37 | 0.26 |
| 4218 | 5392-40-5    | trial                                                                                                            | 2328 | 87 | 9.9E-03 | 1.5E-03 | 3.0E-02 | 1.40 | 3.5E-06 | 1.3E-07 | 6.6E-09 | conf | conf | 3.7E-03 | 5.2E-03 | 1.9E-03 | -5.46 | 5.77 | -7.42 | -1.31 | 0.81 |
| 4219 | 121158-58-5  | Phenol, decarboxyl-, branched                                                                                    | 2328 | 87 | 9.9E-03 | 1.5E-03 | 3.0E-02 | 1.40 | 3.5E-06 | 1.3E-07 | 6.6E-09 | conf | conf | 3.5E-03 | 4.9E-03 | 1.8E-03 | -5.48 | 5.79 | -7.44 | -2.50 | 1.32 |
| 4220 | 68002-71-1   | Glycerides, C16-18                                                                                               | 2328 | 87 | 9.9E-03 | 1.5E-03 | 3.0E-02 | 1.40 | 3.5E-06 | 1.3E-07 | 6.6E-09 | conf | conf | 3.5E-03 | 4       |         |       |      |       |       |      |

|      |             |                                                                       |     |    |         |         |         |      |         |         |         |      |      |         |         |         |       |       |      |       |      |
|------|-------------|-----------------------------------------------------------------------|-----|----|---------|---------|---------|------|---------|---------|---------|------|------|---------|---------|---------|-------|-------|------|-------|------|
| 4354 | 8955-14-1   | anthracene oil, anthracene paste, dist. lights                        | 232 | 87 | 9.9E-03 | 1.5E-03 | 3.0E-02 | 14.0 | 3.5E-06 | 1.3E-07 | 6.6E-09 | conf | conf | 9.1E-02 | 1.3E-01 | 4.6E-02 | -6.07 | -6.37 | 8.03 | -1.30 | 0.64 |
| 4355 | 68551-11-1  | 1-Propene, hydroformylation products, high-boiling                    | 232 | 87 | 9.9E-03 | 1.5E-03 | 3.0E-02 | 14.0 | 3.5E-06 | 1.3E-07 | 6.6E-09 | conf | conf | 9.1E-02 | 1.3E-01 | 4.6E-02 | -6.07 | -6.37 | 8.03 | -1.35 | 0.64 |
| 4356 | 8529-91-9   | Alkyl oxides, C8-14, u-perfluoro                                      | 232 | 87 | 9.9E-03 | 1.5E-03 | 3.0E-02 | 14.0 | 3.5E-06 | 1.3E-07 | 6.6E-09 | conf | conf | 9.1E-02 | 1.3E-01 | 4.6E-02 | -6.07 | -6.37 | 8.03 | -1.84 | 0.64 |
| 4357 | 8529-91-9   | Alkenes, C10-12, C13-15                                               | 232 | 87 | 9.9E-03 | 1.5E-03 | 3.0E-02 | 14.0 | 3.5E-06 | 1.3E-07 | 6.6E-09 | conf | conf | 9.1E-02 | 1.3E-01 | 4.6E-02 | -6.07 | -6.37 | 8.03 | -1.84 | 0.64 |
| 4358 | 8529-91-9   | Alkenes, C6-10, hydroformylation products, high-boiling               | 232 | 87 | 9.9E-03 | 1.5E-03 | 3.0E-02 | 14.0 | 3.5E-06 | 1.3E-07 | 6.6E-09 | conf | conf | 9.1E-02 | 1.3E-01 | 4.6E-02 | -6.07 | -6.37 | 8.03 | -1.84 | 0.64 |
| 4359 | 8529-91-9   | 2-dimethylphenylamine                                                 | 232 | 87 | 9.9E-03 | 1.5E-03 | 3.0E-02 | 14.0 | 3.5E-06 | 1.3E-07 | 6.6E-09 | conf | conf | 9.1E-02 | 1.3E-01 | 4.6E-02 | -6.07 | -6.37 | 8.03 | -1.84 | 0.64 |
| 4358 | 38640-62-9  | bis(isopropyl)azaphthalene                                            | 232 | 87 | 9.9E-03 | 1.5E-03 | 3.0E-02 | 14.0 | 3.5E-06 | 1.3E-07 | 6.6E-09 | conf | conf | 9.0E-02 | 1.3E-01 | 4.5E-02 | -6.07 | -6.38 | 8.03 | -2.11 | 0.70 |
| 4359 | 50586-59-9  | Polysilyltrimethylmethanol, ethylated                                 | 232 | 87 | 9.9E-03 | 1.5E-03 | 3.0E-02 | 14.0 | 3.5E-06 | 1.3E-07 | 6.6E-09 | conf | conf | 8.9E-02 | 1.2E-01 | 4.5E-02 | -6.08 | -6.38 | 8.03 | -2.07 | 1.00 |
| 4360 | 9000-17-1   | Terpenol                                                              | 232 | 87 | 9.9E-03 | 1.5E-03 | 3.0E-02 | 14.0 | 3.5E-06 | 1.3E-07 | 6.6E-09 | conf | conf | 8.9E-02 | 1.2E-01 | 4.5E-02 | -6.08 | -6.38 | 8.03 | -2.07 | 1.00 |
| 4361 | 27138-31-4  | oxydipropyl ether                                                     | 232 | 87 | 9.9E-03 | 1.5E-03 | 3.0E-02 | 14.0 | 3.5E-06 | 1.3E-07 | 6.6E-09 | conf | conf | 8.9E-02 | 1.2E-01 | 4.5E-02 | -6.08 | -6.38 | 8.03 | -2.07 | 1.00 |
| 4362 | 11188-10-1  | Protein oils, sulfonated, unperfumed                                  | 232 | 87 | 9.9E-03 | 1.5E-03 | 3.0E-02 | 14.0 | 3.5E-06 | 1.3E-07 | 6.6E-09 | conf | conf | 8.9E-02 | 1.2E-01 | 4.5E-02 | -6.08 | -6.38 | 8.03 | -2.07 | 1.00 |
| 4363 | 119345-04-0 | Benzene, 1,1'-oxybis-, tetraaryloxy derivs., sulfonated, sodium salts | 232 | 87 | 9.9E-03 | 1.5E-03 | 3.0E-02 | 14.0 | 3.5E-06 | 1.3E-07 | 6.6E-09 | conf | conf | 8.8E-02 | 1.2E-01 | 4.3E-02 | -6.09 | -6.40 | 8.05 | -1.55 | 1.01 |
| 4364 | 12764-11-1  | Benzene, ethenyl-, or arylene derivs.                                 | 232 | 87 | 9.9E-03 | 1.5E-03 | 3.0E-02 | 14.0 | 3.5E-06 | 1.3E-07 | 6.6E-09 | conf | conf | 8.8E-02 | 1.2E-01 | 4.3E-02 | -6.10 | -6.40 | 8.05 | -2.14 | 0.25 |
| 4365 | 11851-07-1  | methyl 3-oxo-2-oxopropylphosphonate                                   | 232 | 87 | 9.9E-03 | 1.5E-03 | 3.0E-02 | 14.0 | 3.5E-06 | 1.3E-07 | 6.6E-09 | conf | conf | 8.8E-02 | 1.2E-01 | 4.3E-02 | -6.10 | -6.40 | 8.05 | -2.14 | 0.25 |
| 4366 | 17601-71-4  | 4-methyl-2-oxopropylphosphonate                                       | 232 | 87 | 9.9E-03 | 1.5E-03 | 3.0E-02 | 14.0 | 3.5E-06 | 1.3E-07 | 6.6E-09 | conf | conf | 8.8E-02 | 1.2E-01 | 4.3E-02 | -6.10 | -6.40 | 8.05 | -2.14 | 0.25 |
| 4367 | 3303-01-3   | disodium adipate                                                      | 232 | 87 | 9.9E-03 | 1.5E-03 | 3.0E-02 | 14.0 | 3.5E-06 | 1.3E-07 | 6.6E-09 | conf | conf | 8.8E-02 | 1.2E-01 | 4.3E-02 | -6.10 | -6.40 | 8.05 | -2.14 | 0.25 |
| 4368 | 10281-57-1  | Roan, reaction products with formaldehyde                             | 232 | 87 | 9.9E-03 | 1.5E-03 | 3.0E-02 | 14.0 | 3.5E-06 | 1.3E-07 | 6.6E-09 | conf | conf | 8.8E-02 | 1.2E-01 | 4.3E-02 | -6.10 | -6.40 | 8.05 | -2.14 | 0.25 |
| 4369 | 27299-41-4  | dihydrol ether                                                        | 232 | 87 | 9.9E-03 | 1.5E-03 | 3.0E-02 | 14.0 | 3.5E-06 | 1.3E-07 | 6.6E-09 | conf | conf | 8.8E-02 | 1.2E-01 | 4.3E-02 | -6.10 | -6.40 | 8.05 | -2.14 | 0.25 |
| 4370 | 113709-63-1 | C16-18 olefin monomers, saturated and unsaturated alkylamines         | 232 | 87 | 9.9E-03 | 1.5E-03 | 3.0E-02 | 14.0 | 3.5E-06 | 1.3E-07 | 6.6E-09 | conf | conf | 8.8E-02 | 1.2E-01 | 4.3E-02 | -6.10 | -6.40 | 8.05 | -2.14 | 0.25 |
| 4371 | 68440-01-2  | Amines, oxo-, N,N'-bis-(2-dimethylamino)ethyl                         | 232 | 87 | 9.9E-03 | 1.5E-03 | 3.0E-02 | 14.0 | 3.5E-06 | 1.3E-07 | 6.6E-09 | conf | conf | 8.8E-02 | 1.2E-01 | 4.3E-02 | -6.10 | -6.40 | 8.05 | -2.14 | 0.25 |
| 4372 | 68440-01-2  | Amines, oxo-, N,N'-bis-(2-dimethylamino)ethyl                         | 232 | 87 | 9.9E-03 | 1.5E-03 | 3.0E-02 | 14.0 | 3.5E-06 | 1.3E-07 | 6.6E-09 | conf | conf | 8.8E-02 | 1.2E-01 | 4.3E-02 | -6.10 | -6.40 | 8.05 | -2.14 | 0.25 |
| 4373 | 68440-01-2  | Amines, oxo-, N,N'-bis-(2-dimethylamino)ethyl                         | 232 | 87 | 9.9E-03 | 1.5E-03 | 3.0E-02 | 14.0 | 3.5E-06 | 1.3E-07 | 6.6E-09 | conf | conf | 8.8E-02 | 1.2E-01 | 4.3E-02 | -6.10 | -6.40 | 8.05 | -2.14 | 0.25 |
| 4374 | 68440-01-2  | Amines, oxo-, N,N'-bis-(2-dimethylamino)ethyl                         | 232 | 87 | 9.9E-03 | 1.5E-03 | 3.0E-02 | 14.0 | 3.5E-06 | 1.3E-07 | 6.6E-09 | conf | conf | 8.8E-02 | 1.2E-01 | 4.3E-02 | -6.10 | -6.40 | 8.05 | -2.14 | 0.25 |
| 4375 | 68440-01-2  | Amines, oxo-, N,N'-bis-(2-dimethylamino)ethyl                         | 232 | 87 | 9.9E-03 | 1.5E-03 | 3.0E-02 | 14.0 | 3.5E-06 | 1.3E-07 | 6.6E-09 | conf | conf | 8.8E-02 | 1.2E-01 | 4.3E-02 | -6.10 | -6.40 | 8.05 | -2.14 | 0.25 |
| 4376 | 68440-01-2  | Amines, oxo-, N,N'-bis-(2-dimethylamino)ethyl                         | 232 | 87 | 9.9E-03 | 1.5E-03 | 3.0E-02 | 14.0 | 3.5E-06 | 1.3E-07 | 6.6E-09 | conf | conf | 8.8E-02 | 1.2E-01 | 4.3E-02 | -6.10 | -6.40 | 8.05 | -2.14 | 0.25 |
| 4377 | 68440-01-2  | Amines, oxo-, N,N'-bis-(2-dimethylamino)ethyl                         | 232 | 87 | 9.9E-03 | 1.5E-03 | 3.0E-02 | 14.0 | 3.5E-06 | 1.3E-07 | 6.6E-09 | conf | conf | 8.8E-02 | 1.2E-01 | 4.3E-02 | -6.10 | -6.40 | 8.05 | -2.14 | 0.25 |
| 4378 | 68440-01-2  | Amines, oxo-, N,N'-bis-(2-dimethylamino)ethyl                         | 232 | 87 | 9.9E-03 | 1.5E-03 | 3.0E-02 | 14.0 | 3.5E-06 | 1.3E-07 | 6.6E-09 | conf | conf | 8.8E-02 | 1.2E-01 | 4.3E-02 | -6.10 | -6.40 | 8.05 | -2.14 | 0.25 |
| 4379 | 68440-01-2  | Amines, oxo-, N,N'-bis-(2-dimethylamino)ethyl                         | 232 | 87 | 9.9E-03 | 1.5E-03 | 3.0E-02 | 14.0 | 3.5E-06 | 1.3E-07 | 6.6E-09 | conf | conf | 8.8E-02 | 1.2E-01 | 4.3E-02 | -6.10 | -6.40 | 8.05 | -2.14 | 0.25 |
| 4380 | 68440-01-2  | Amines, oxo-, N,N'-bis-(2-dimethylamino)ethyl                         | 232 | 87 | 9.9E-03 | 1.5E-03 | 3.0E-02 | 14.0 | 3.5E-06 | 1.3E-07 | 6.6E-09 | conf | conf | 8.8E-02 | 1.2E-01 | 4.3E-02 | -6.10 | -6.40 | 8.05 | -2.14 | 0.25 |
| 4381 | 68440-01-2  | Amines, oxo-, N,N'-bis-(2-dimethylamino)ethyl                         | 232 | 87 | 9.9E-03 | 1.5E-03 | 3.0E-02 | 14.0 | 3.5E-06 | 1.3E-07 | 6.6E-09 | conf | conf | 8.8E-02 | 1.2E-01 | 4.3E-02 | -6.10 | -6.40 | 8.05 | -2.14 | 0.25 |
| 4382 | 68440-01-2  | Amines, oxo-, N,N'-bis-(2-dimethylamino)ethyl                         | 232 | 87 | 9.9E-03 | 1.5E-03 | 3.0E-02 | 14.0 | 3.5E-06 | 1.3E-07 | 6.6E-09 | conf | conf | 8.8E-02 | 1.2E-01 | 4.3E-02 | -6.10 | -6.40 | 8.05 | -2.14 | 0.25 |
| 4383 | 68440-01-2  | Amines, oxo-, N,N'-bis-(2-dimethylamino)ethyl                         | 232 | 87 | 9.9E-03 | 1.5E-03 | 3.0E-02 | 14.0 | 3.5E-06 | 1.3E-07 | 6.6E-09 | conf | conf | 8.8E-02 | 1.2E-01 | 4.3E-02 | -6.10 | -6.40 | 8.05 | -2.14 | 0.25 |
| 4384 | 68440-01-2  | Amines, oxo-, N,N'-bis-(2-dimethylamino)ethyl                         | 232 | 87 | 9.9E-03 | 1.5E-03 | 3.0E-02 | 14.0 | 3.5E-06 | 1.3E-07 | 6.6E-09 | conf | conf | 8.8E-02 | 1.2E-01 | 4.3E-02 | -6.10 | -6.40 | 8.05 | -2.14 | 0.25 |
| 4385 | 68440-01-2  | Amines, oxo-, N,N'-bis-(2-dimethylamino)ethyl                         | 232 | 87 | 9.9E-03 | 1.5E-03 | 3.0E-02 | 14.0 | 3.5E-06 | 1.3E-07 | 6.6E-09 | conf | conf | 8.8E-02 | 1.2E-01 | 4.3E-02 | -6.10 | -6.40 | 8.05 | -2.14 | 0.25 |
| 4386 | 68440-01-2  | Amines, oxo-, N,N'-bis-(2-dimethylamino)ethyl                         | 232 | 87 | 9.9E-03 | 1.5E-03 | 3.0E-02 | 14.0 | 3.5E-06 | 1.3E-07 | 6.6E-09 | conf | conf | 8.8E-02 | 1.2E-01 | 4.3E-02 | -6.10 | -6.40 | 8.05 | -2.14 | 0.25 |
| 4387 | 68440-01-2  | Amines, oxo-, N,N'-bis-(2-dimethylamino)ethyl                         | 232 | 87 | 9.9E-03 | 1.5E-03 | 3.0E-02 | 14.0 | 3.5E-06 | 1.3E-07 | 6.6E-09 | conf | conf | 8.8E-02 | 1.2E-01 | 4.3E-02 | -6.10 | -6.40 | 8.05 | -2.14 | 0.25 |
| 4388 | 68440-01-2  | Amines, oxo-, N,N'-bis-(2-dimethylamino)ethyl                         | 232 | 87 | 9.9E-03 | 1.5E-03 | 3.0E-02 | 14.0 | 3.5E-06 | 1.3E-07 | 6.6E-09 | conf | conf | 8.8E-02 | 1.2E-01 | 4.3E-02 | -6.10 | -6.40 | 8.05 | -2.14 | 0.25 |
| 4389 | 68440-01-2  | Amines, oxo-, N,N'-bis-(2-dimethylamino)ethyl                         | 232 | 87 | 9.9E-03 | 1.5E-03 | 3.0E-02 | 14.0 | 3.5E-06 | 1.3E-07 | 6.6E-09 | conf | conf | 8.8E-02 | 1.2E-01 | 4.3E-02 | -6.10 | -6.40 | 8.05 | -2.14 | 0.25 |
| 4390 | 68440-01-2  | Amines, oxo-, N,N'-bis-(2-dimethylamino)ethyl                         | 232 | 87 | 9.9E-03 | 1.5E-03 | 3.0E-02 | 14.0 | 3.5E-06 | 1.3E-07 | 6.6E-09 | conf | conf | 8.8E-02 | 1.2E-01 | 4.3E-02 | -6.10 | -6.40 | 8.05 | -2.14 | 0.25 |
| 4391 | 68440-01-2  | Amines, oxo-, N,N'-bis-(2-dimethylamino)ethyl                         | 232 | 87 | 9.9E-03 | 1.5E-03 | 3.0E-02 | 14.0 | 3.5E-06 | 1.3E-07 | 6.6E-09 | conf | conf | 8.8E-02 | 1.2E-01 | 4.3E-02 | -6.10 | -6.40 | 8.05 | -2.14 | 0.25 |
| 4392 | 68440-01-2  | Amines, oxo-, N,N'-bis-(2-dimethylamino)ethyl                         | 232 | 87 | 9.9E-03 | 1.5E-03 | 3.0E-02 | 14.0 | 3.5E-06 | 1.3E-07 | 6.6E-09 | conf | conf | 8.8E-02 | 1.2E-01 | 4.3E-02 | -6.10 | -6.40 | 8.05 | -2.14 | 0.25 |
| 4393 | 68440-01-2  | Amines, oxo-, N,N'-bis-(2-dimethylamino)ethyl                         | 232 | 87 | 9.9E-03 | 1.5E-03 | 3.0E-02 | 14.0 | 3.5E-06 | 1.3E-07 | 6.6E-09 | conf | conf | 8.8E-02 | 1.2E-01 | 4.3E-02 | -6.10 | -6.40 | 8.05 | -2.14 | 0.25 |
| 4394 | 68440-01-2  | Amines, oxo-, N,N'-bis-(2-dimethylamino)ethyl                         | 232 | 87 | 9.9E-03 | 1.5E-03 | 3.0E-02 | 14.0 | 3.5E-06 | 1.3E-07 | 6.6E-09 | conf | conf | 8.8E-02 | 1.2E-01 | 4.3E-02 | -6.10 | -6.40 | 8.05 | -2.14 | 0.25 |
| 4395 | 68440-01-2  | Amines, oxo-, N,N'-bis-(2-dimethylamino)ethyl                         | 232 | 87 | 9.9E-03 | 1.5E-03 | 3.0E-02 | 14.0 | 3.5E-06 | 1.3E-07 | 6.6E-09 | conf | conf | 8.8E-02 | 1.2E-01 | 4.3E-02 | -6.10 | -6.40 | 8.05 | -2.14 | 0.25 |
| 4396 | 68440-01-2  | Amines, oxo-, N,N'-bis-(2-dimethylamino)ethyl                         | 232 | 87 | 9.9E-03 | 1.5E-03 | 3.0E-02 | 14.0 | 3.5E-06 | 1.3E-07 | 6.6E-09 | conf | conf | 8.8E-02 | 1.2E-01 | 4.3E-02 | -6.10 | -6.40 | 8.05 | -2.14 | 0.25 |
| 4397 | 68440-01-2  | Amines, oxo-, N,N'-bis-(2-dimethylamino)ethyl                         | 232 | 87 | 9.9E-03 | 1.5E-03 | 3.0E-02 | 14.0 | 3.5E-06 | 1.3E-07 | 6.6E-09 | conf | conf | 8.8E-02 | 1.2E-01 | 4.3E-02 | -6.10 | -6.40 | 8.05 | -2.14 | 0.25 |
| 4398 | 68440-01-2  | Amines, oxo-, N,N'-bis-(2-dimethylamino)ethyl                         | 232 | 87 | 9.9E-03 | 1.5E-03 | 3.0E-02 | 14.0 | 3.5E-06 | 1.3E-07 | 6.6E-09 | conf | conf | 8.8E-02 | 1.2E-01 | 4.3E-02 | -6.10 | -6.40 | 8.05 | -2.14 | 0.25 |
| 4399 | 68440-01-2  | Amines, oxo-, N,N'-bis-(2-dimethylamino)ethyl                         | 232 | 87 | 9.9E-03 | 1.5E-03 | 3.0E-02 | 14.0 | 3.5E-06 | 1.3E-07 | 6.6E-09 | conf | conf | 8.8E-02 | 1.2E-01 | 4.3E-02 | -6.10 | -6.40 | 8.05 | -2.14 | 0.25 |
| 4400 | 68440-01-2  | Amines, oxo-, N,N'-bis-(2-dimethylamino)ethyl                         | 232 | 87 | 9.9E-03 | 1.5E-03 | 3.0E-02 | 14.0 | 3.5E-06 | 1.3E-07 | 6.6E-09 | conf | conf | 8.8E-02 | 1.2E-01 | 4.3E-02 | -6.10 | -6.40 | 8.05 | -2.14 | 0.25 |
| 4401 | 68440-01-2  | Amines, oxo-, N,N'-bis-(2-dimethylamino)ethyl                         | 232 | 87 | 9.9E-03 | 1.5E-03 | 3.0E-02 | 14.0 | 3.5E-06 | 1.3E-07 | 6.6E-09 | conf | conf | 8.8E-02 | 1.2E-01 | 4.3E-02 | -6.10 | -6.40 | 8.05 | -2.14 | 0.25 |
| 4402 | 68440-01-2  | Amines, oxo-, N,N'-bis-(2-dimethylamino)ethyl                         | 232 | 87 | 9.9E-03 | 1.5E-03 | 3.0E-02 | 14.0 | 3.5E-06 | 1.3E-07 | 6.6E-09 | conf | conf | 8.8E-02 | 1.2E-01 | 4.3E-02 | -6.10 | -6.40 | 8.05 | -2.14 | 0.25 |
| 4403 | 68440-01-2  | Amines, oxo-, N,N'-bis-(2-dimethylamino)ethyl                         | 232 | 87 | 9.9E-03 | 1.5E-03 | 3.0E-02 | 14.0 | 3.5E-06 | 1.3E-07 | 6.6E-09 | conf | conf | 8.8E-02 | 1.2E-01 | 4.3E-02 | -6.10 | -6.40 | 8.05 | -2.14 |      |

|      |              |                                                                                                                              |     |    |         |         |         |      |         |         |         |      |      |         |         |         |       |       |      |       |      |
|------|--------------|------------------------------------------------------------------------------------------------------------------------------|-----|----|---------|---------|---------|------|---------|---------|---------|------|------|---------|---------|---------|-------|-------|------|-------|------|
| 4535 | 1330-78.5    | tris(methylphenyl) phosphite                                                                                                 | 233 | 87 | 9.9E-03 | 1.5E-03 | 3.0E-02 | 1.40 | 3.5E-06 | 1.3E-07 | 6.6E-09 | conf | conf | 2.0E-02 | 2.8E-06 | 1.0E-02 | -4.72 | -7.03 | 8.68 | -2.70 | 1.18 |
| 4536 | 6802-29.1    | 1,4-bis(methylphenyl)-1,3-butadiene, dimers, oligomeric reaction products with tall-oil fatty acids and triethylenetetramine | 233 | 87 | 9.9E-03 | 1.5E-03 | 3.0E-02 | 1.40 | 3.5E-06 | 1.3E-07 | 6.6E-09 | conf | conf | 2.0E-02 | 2.8E-06 | 1.0E-02 | -4.72 | -7.03 | 8.68 | -2.70 | 1.18 |
| 4537 | 26896-48.0   | tricyclocandianmethanol                                                                                                      | 233 | 87 | 9.9E-03 | 1.5E-03 | 3.0E-02 | 1.40 | 3.5E-06 | 1.3E-07 | 6.6E-09 | conf | conf | 2.0E-02 | 2.8E-06 | 1.0E-02 | -4.72 | -7.03 | 8.68 | -2.70 | 1.18 |
| 4538 | 68391-0.9    | Quaternary ammonium compounds, di-C12-18-alkylmethyl, chlorides                                                              | 233 | 87 | 9.9E-03 | 1.5E-03 | 3.0E-02 | 1.40 | 3.5E-06 | 1.3E-07 | 6.6E-09 | conf | conf | 2.0E-02 | 2.8E-06 | 1.0E-02 | -4.72 | -7.03 | 8.68 | -2.70 | 1.18 |
| 4539 | 6802-86.0    | Fatty acids, C16-22                                                                                                          | 233 | 87 | 9.9E-03 | 1.5E-03 | 3.0E-02 | 1.40 | 3.5E-06 | 1.3E-07 | 6.6E-09 | conf | conf | 2.0E-02 | 2.8E-06 | 1.0E-02 | -4.72 | -7.03 | 8.68 | -2.70 | 1.18 |
| 4540 | 947990-0.0   | Oils, animal, sulfated, sodium salts                                                                                         | 233 | 87 | 9.9E-03 | 1.5E-03 | 3.0E-02 | 1.40 | 3.5E-06 | 1.3E-07 | 6.6E-09 | conf | conf | 1.9E-02 | 2.7E-06 | 9.7E-04 | -4.74 | -7.05 | 8.70 | -2.57 | 0.55 |
| 4541 | 67390-19.0   | Oils, vegetable, sulfated                                                                                                    | 233 | 87 | 9.9E-03 | 1.5E-03 | 3.0E-02 | 1.40 | 3.5E-06 | 1.3E-07 | 6.6E-09 | conf | conf | 1.9E-02 | 2.7E-06 | 9.7E-04 | -4.74 | -7.05 | 8.70 | -2.57 | 0.55 |
| 4542 | 68201-37.6   | Oxidocacetic acids, branched and linear                                                                                      | 233 | 87 | 9.9E-03 | 1.5E-03 | 3.0E-02 | 1.40 | 3.5E-06 | 1.3E-07 | 6.6E-09 | conf | conf | 1.9E-02 | 2.7E-06 | 9.7E-04 | -4.74 | -7.05 | 8.70 | -2.57 | 0.55 |
| 4543 | 68441-66.7   | Glyceric acid, mixed esters with dipenterythritol, octanoic acid and valeric acid                                            | 233 | 87 | 9.9E-03 | 1.5E-03 | 3.0E-02 | 1.40 | 3.5E-06 | 1.3E-07 | 6.6E-09 | conf | conf | 1.9E-02 | 2.7E-06 | 9.7E-04 | -4.74 | -7.05 | 8.70 | -2.57 | 0.55 |
| 4544 | 67146-08.1   | Unsated oil, polymeric                                                                                                       | 233 | 87 | 9.9E-03 | 1.5E-03 | 3.0E-02 | 1.40 | 3.5E-06 | 1.3E-07 | 6.6E-09 | conf | conf | 1.9E-02 | 2.7E-06 | 9.7E-04 | -4.74 | -7.05 | 8.70 | -2.57 | 0.55 |
| 4545 | 6802-70.0    | Dicacids, C16-22                                                                                                             | 233 | 87 | 9.9E-03 | 1.5E-03 | 3.0E-02 | 1.40 | 3.5E-06 | 1.3E-07 | 6.6E-09 | conf | conf | 1.8E-02 | 2.6E-06 | 9.2E-04 | -4.76 | -7.07 | 8.72 | -2.61 | 0.55 |
| 4546 | 1228892-64.1 | Fatty acids C18 unsat., reaction products with tetraethylenepentamine                                                        | 233 | 87 | 9.9E-03 | 1.5E-03 | 3.0E-02 | 1.40 | 3.5E-06 | 1.3E-07 | 6.6E-09 | conf | conf | 1.8E-02 | 2.6E-06 | 9.2E-04 | -4.76 | -7.07 | 8.72 | -2.61 | 0.55 |
| 4547 | 27970-79.2   | 1-hydroxy-2-methylhexan-3-ol                                                                                                 | 233 | 87 | 9.9E-03 | 1.5E-03 | 3.0E-02 | 1.40 | 3.5E-06 | 1.3E-07 | 6.6E-09 | conf | conf | 1.8E-02 | 2.6E-06 | 9.2E-04 | -4.76 | -7.07 | 8.72 | -2.61 | 0.55 |
| 4548 | 161292-61.3  | 615-322-0                                                                                                                    | 233 | 87 | 9.9E-03 | 1.5E-03 | 3.0E-02 | 1.40 | 3.5E-06 | 1.3E-07 | 6.6E-09 | conf | conf | 1.8E-02 | 2.6E-06 | 9.2E-04 | -4.76 | -7.07 | 8.72 | -2.61 | 0.55 |
| 4549 | 116086-44.1  | Reaction mass of ethyl (2S,3S)-4,4-dibromo-2-methylpentanoate and ethyl (2R,3R)-3,4-dibromo-2-methylbutanoate                | 233 | 87 | 9.9E-03 | 1.5E-03 | 3.0E-02 | 1.40 | 3.5E-06 | 1.3E-07 | 6.6E-09 | conf | conf | 1.8E-02 | 2.6E-06 | 9.2E-04 | -4.76 | -7.07 | 8.72 | -2.61 | 0.55 |
| 4550 | 68411-44.9   | Benzene, butyl-, branched and linear                                                                                         | 233 | 87 | 9.9E-03 | 1.5E-03 | 3.0E-02 | 1.40 | 3.5E-06 | 1.3E-07 | 6.6E-09 | conf | conf | 1.8E-02 | 2.6E-06 | 9.2E-04 | -4.76 | -7.07 | 8.72 | -2.61 | 0.55 |
| 4551 | 65311-69.1   | 1,4-anhydro-2,5-dibromo-2-(methoxycarbonyl)-1-phenoxi-3-ol                                                                   | 233 | 87 | 9.9E-03 | 1.5E-03 | 3.0E-02 | 1.40 | 3.5E-06 | 1.3E-07 | 6.6E-09 | conf | conf | 1.8E-02 | 2.6E-06 | 9.2E-04 | -4.76 | -7.07 | 8.72 | -2.61 | 0.55 |
| 4552 | 68593-9.8    | Benzeneisobutyl alcohol, mono-C12-13-branched alkyl esters, calcium salts                                                    | 233 | 87 | 9.9E-03 | 1.5E-03 | 3.0E-02 | 1.40 | 3.5E-06 | 1.3E-07 | 6.6E-09 | conf | conf | 1.8E-02 | 2.6E-06 | 9.2E-04 | -4.76 | -7.07 | 8.72 | -2.61 | 0.55 |
| 4553 | 59512-87.1   | Fatty acids, C16-18, C12-18-alkyl esters                                                                                     | 233 | 87 | 9.9E-03 | 1.5E-03 | 3.0E-02 | 1.40 | 3.5E-06 | 1.3E-07 | 6.6E-09 | conf | conf | 1.8E-02 | 2.6E-06 | 9.2E-04 | -4.76 | -7.07 | 8.72 | -2.61 | 0.55 |
| 4554 | 95912-8.2    | Fatty acids, C16-18, isobutyl esters                                                                                         | 233 | 87 | 9.9E-03 | 1.5E-03 | 3.0E-02 | 1.40 | 3.5E-06 | 1.3E-07 | 6.6E-09 | conf | conf | 1.8E-02 | 2.6E-06 | 9.2E-04 | -4.76 | -7.07 | 8.72 | -2.61 | 0.55 |
| 4555 | 122386-15.1  | N-butyl-N-C16-18 [even numbered]-allyl-N-methyl-C16-18 [even numbered]-allyl-1-aminium chloride                              | 233 | 87 | 9.9E-03 | 1.5E-03 | 3.0E-02 | 1.40 | 3.5E-06 | 1.3E-07 | 6.6E-09 | conf | conf | 1.8E-02 | 2.6E-06 | 9.2E-04 | -4.76 | -7.07 | 8.72 | -2.61 | 0.55 |
| 4556 | 84649-98.9   | Cinnamum zeolium, conf.                                                                                                      | 233 | 87 | 9.9E-03 | 1.5E-03 | 3.0E-02 | 1.40 | 3.5E-06 | 1.3E-07 | 6.6E-09 | conf | conf | 1.8E-02 | 2.6E-06 | 9.2E-04 | -4.76 | -7.07 | 8.72 | -2.61 | 0.55 |
| 4557 | 124568-61.1  | 2-Propenoic acid, reaction products with pentaerythritol                                                                     | 233 | 87 | 9.9E-03 | 1.5E-03 | 3.0E-02 | 1.40 | 3.5E-06 | 1.3E-07 | 6.6E-09 | conf | conf | 1.8E-02 | 2.6E-06 | 9.2E-04 | -4.76 | -7.07 | 8.72 | -2.61 | 0.55 |
| 4558 | 1338-39.2    | isobutyl laurate                                                                                                             | 233 | 87 | 9.9E-03 | 1.5E-03 | 3.0E-02 | 1.40 | 3.5E-06 | 1.3E-07 | 6.6E-09 | conf | conf | 1.8E-02 | 2.6E-06 | 9.2E-04 | -4.76 | -7.07 | 8.72 | -2.61 | 0.55 |
| 4559 | 94899-06.0   | Tar acids, xylenol fraction                                                                                                  | 233 | 87 | 9.9E-03 | 1.5E-03 | 3.0E-02 | 1.40 | 3.5E-06 | 1.3E-07 | 6.6E-09 | conf | conf | 1.7E-02 | 2.4E-06 | 8.7E-04 | -4.79 | -7.09 | 8.74 | -2.71 | 0.35 |
| 4560 | 77445-66.5   | tris(isobutyl) phosphite                                                                                                     | 233 | 87 | 9.9E-03 | 1.5E-03 | 3.0E-02 | 1.40 | 3.5E-06 | 1.3E-07 | 6.6E-09 | conf | conf | 1.7E-02 | 2.4E-06 | 8.7E-04 | -4.79 | -7.09 | 8.74 | -2.71 | 0.35 |
| 4561 | 97925-95.6   | Ethanol, 2,2'-imino-, N-C13-15-branched and linear alkyl derivs.                                                             | 233 | 87 | 9.9E-03 | 1.5E-03 | 3.0E-02 | 1.40 | 3.5E-06 | 1.3E-07 | 6.6E-09 | conf | conf | 1.7E-02 | 2.4E-06 | 8.7E-04 | -4.79 | -7.10 | 8.75 | -2.79 | 0.91 |
| 4562 | 27253-26.8   | disulfoxide phthalate                                                                                                        | 233 | 87 | 9.9E-03 | 1.5E-03 | 3.0E-02 | 1.40 | 3.5E-06 | 1.3E-07 | 6.6E-09 | conf | conf | 1.7E-02 | 2.4E-06 | 8.6E-04 | -4.79 | -7.10 | 8.75 | -2.83 | 0.52 |
| 4563 | 29385-43.1   | methyl-H-benzotriazene                                                                                                       | 233 | 87 | 9.9E-03 | 1.5E-03 | 3.0E-02 | 1.40 | 3.5E-06 | 1.3E-07 | 6.6E-09 | conf | conf | 1.7E-02 | 2.4E-06 | 8.6E-04 | -4.79 | -7.10 | 8.75 | -2.83 | 0.52 |
| 4564 | 25504-98.5   | disulfoxide phenyl phosphite                                                                                                 | 233 | 87 | 9.9E-03 | 1.5E-03 | 3.0E-02 | 1.40 | 3.5E-06 | 1.3E-07 | 6.6E-09 | conf | conf | 1.7E-02 | 2.4E-06 | 8.6E-04 | -4.80 | -7.11 | 8.76 | -2.40 | 0.64 |
| 4565 | 26544-36.7   | oligine-3-tetrapropyleneurea-2,5-dione                                                                                       | 233 | 87 | 9.9E-03 | 1.5E-03 | 3.0E-02 | 1.40 | 3.5E-06 | 1.3E-07 | 6.6E-09 | conf | conf | 1.7E-02 | 2.4E-06 | 8.3E-04 | -4.80 | -7.11 | 8.76 | -2.41 | 0.64 |
| 4566 | 126-86.3     | 2,4,7-Triisobutyl-5-nor-4-n-2-diol                                                                                           | 233 | 87 | 9.9E-03 | 1.5E-03 | 3.0E-02 | 1.40 | 3.5E-06 | 1.3E-07 | 6.6E-09 | conf | conf | 1.7E-02 | 2.4E-06 | 8.3E-04 | -4.81 | -7.11 | 8.77 | -4.13 | 0.32 |
| 4567 | 68187-76.8   | Castor oil, sulfated, sodium salt                                                                                            | 233 | 87 | 9.9E-03 | 1.5E-03 | 3.0E-02 | 1.40 | 3.5E-06 | 1.3E-07 | 6.6E-09 | conf | conf | 1.7E-02 | 2.4E-06 | 8.3E-04 | -4.81 | -7.12 | 8.77 | -4.09 | 0.44 |
| 4568 | 1218787-32.4 | 2,2'-(C16-18 [even numbered]-C18 unsaturated allyl imino) diethanol                                                          | 233 | 87 | 9.9E-03 | 1.5E-03 | 3.0E-02 | 1.40 | 3.5E-06 | 1.3E-07 | 6.6E-09 | conf | conf | 1.6E-02 | 2.3E-06 | 8.2E-04 | -4.83 | -7.13 | 8.80 | -4.01 | 0.40 |
| 4569 | 68657-79.4   | Phosphordibutyl acid, mixed O,O-bis(hio-Br and pentyl) esters, zinc salts                                                    | 233 | 87 | 9.9E-03 | 1.5E-03 | 3.0E-02 | 1.40 | 3.5E-06 | 1.3E-07 | 6.6E-09 | conf | conf | 1.6E-02 | 2.3E-06 | 8.2E-04 | -4.81 | -7.12 | 8.77 | -4.17 | 0.37 |
| 4570 | 32102-21.4   | 4-tert-butylcyclohexyl acetate                                                                                               | 233 | 87 | 9.9E-03 | 1.5E-03 | 3.0E-02 | 1.40 | 3.5E-06 | 1.3E-07 | 6.6E-09 | conf | conf | 1.6E-02 | 2.3E-06 | 8.1E-04 | -4.82 | -7.12 | 8.77 | -4.19 | 0.23 |
| 4571 | 68686-69.2   | Acetic acid, chloro-, branched and linear                                                                                    | 233 | 87 | 9.9E-03 | 1.5E-03 | 3.0E-02 | 1.40 | 3.5E-06 | 1.3E-07 | 6.6E-09 | conf | conf | 1.5E-02 | 2.1E-06 | 8.1E-04 | -4.82 | -7.13 | 8.80 | -4.17 | 0.78 |
| 4572 | 25550-51.0   | hexamethylenephthalic anhydride                                                                                              | 233 | 87 | 9.9E-03 | 1.5E-03 | 3.0E-02 | 1.40 | 3.5E-06 | 1.3E-07 | 6.6E-09 | conf | conf | 1.6E-02 | 2.2E-06 | 8.0E-04 | -4.82 | -7.13 | 8.78 | -4.07 | 0.29 |
| 4573 | 68402-9.9    | 614-668-1                                                                                                                    | 233 | 87 | 9.9E-03 | 1.5E-03 | 3.0E-02 | 1.40 | 3.5E-06 | 1.3E-07 | 6.6E-09 | conf | conf | 1.6E-02 | 2.2E-06 | 8.0E-04 | -4.82 | -7.13 | 8.78 | -4.07 | 0.29 |
| 4574 | 68583-51.7   | Deanoic acid, mixed diesters with octanoic acid and propylene glycol                                                         | 233 | 87 | 9.9E-03 | 1.5E-03 | 3.0E-02 | 1.40 | 3.5E-06 | 1.3E-07 | 6.6E-09 | conf | conf | 1.6E-02 | 2.2E-06 | 8.0E-04 | -4.82 | -7.13 | 8.78 | -4.07 | 0.29 |
| 4575 | 94793-75.1   | Hexane, chlorinated, epoxidized, distn. residues                                                                             | 233 | 87 | 9.9E-03 | 1.5E-03 | 3.0E-02 | 1.40 | 3.5E-06 | 1.3E-07 | 6.6E-09 | conf | conf | 1.6E-02 | 2.2E-06 | 7.9E-04 | -4.83 | -7.13 | 8.78 | -4.04 | 0.64 |
| 4576 | 1338-41.6    | isobutyl stearate                                                                                                            | 233 | 87 | 9.9E-03 | 1.5E-03 | 3.0E-02 | 1.40 | 3.5E-06 | 1.3E-07 | 6.6E-09 | conf | conf | 1.6E-02 | 2.2E-06 | 7.8E-04 | -4.83 | -7.13 | 8.78 | -4.04 | 0.64 |
| 4577 | 9012-08.0    | Amlyase, gluc-                                                                                                               | 233 | 87 | 9.9E-03 | 1.5E-03 | 3.0E-02 | 1.40 | 3.5E-06 | 1.3E-07 | 6.6E-09 | conf | conf | 1.6E-02 | 2.2E-06 | 7.8E-04 | -4.84 | -7.14 | 8.79 | -3.98 | 0.28 |
| 4578 | 1160164-88.1 | Alcohol, C18, 22, dist. residues                                                                                             | 233 | 87 | 9.9E-03 | 1.5E-03 | 3.0E-02 | 1.40 | 3.5E-06 | 1.3E-07 | 6.6E-09 | conf | conf | 1.5E-02 | 2.2E-06 | 7.7E-04 | -4.84 | -7.14 | 8.80 | -4.50 | 0.64 |
| 4579 | 68439-75.8   | Amides, di-C12-18 alkyl esters                                                                                               | 233 | 87 | 9.9E-03 | 1.5E-03 | 3.0E-02 | 1.40 | 3.5E-06 | 1.3E-07 | 6.6E-09 | conf | conf | 1.5E-02 | 2.2E-06 | 7.7E-04 | -4.84 | -7.14 | 8.80 | -4.50 | 0.64 |
| 4580 | 68855-4.8    | Phenol, dehydrated, calcium salts                                                                                            | 233 | 87 | 9.9E-03 | 1.5E-03 | 3.0E-02 | 1.40 | 3.5E-06 | 1.3E-07 | 6.6E-09 | conf | conf | 1.5E-02 | 2.2E-06 | 7.7E-04 | -4.85 | -7.16 | 8.81 | -2.21 | 0.41 |
| 4581 | 14062-65.8   | extract residues (acid lab. high temperature, naphthalene oil alkaline, distn. overheads                                     | 233 | 87 | 9.9E-03 | 1.5E-03 | 3.0E-02 | 1.40 | 3.5E-06 | 1.3E-07 | 6.6E-09 | conf | conf | 1.5E-02 | 2.2E-06 | 7.7E-04 | -4.85 | -7.16 | 8.81 | -2.21 | 0.41 |
| 4582 | 9000-90.2    | Amlyase, n-                                                                                                                  | 233 | 87 | 9.9E-03 | 1.5E-03 | 3.0E-02 | 1.40 | 3.5E-06 | 1.3E-07 | 6.6E-09 | conf | conf | 1.5E-02 | 2.2E-06 | 7.7E-04 | -4.85 | -7.16 | 8.81 | -2.21 | 0.41 |
| 4583 | 71786-0.2    | Ethanol, 2,2'-imino-, N-C12-18 alkyl derivs.                                                                                 | 233 | 87 | 9.9E-03 | 1.5E-03 | 3.0E-02 | 1.40 | 3.5E-06 | 1.3E-07 | 6.6E-09 | conf | conf | 1.5E-02 | 2.2E-06 | 7.7E-04 | -4.85 | -7.16 | 8.81 | -2.21 | 0.41 |
| 4584 | 67762-40.4   | Fatty acids, tall-oil, Bu. esters                                                                                            | 233 | 87 | 9.9E-03 | 1.5E-03 | 3.0E-02 | 1.40 | 3.5E-06 | 1.3E-07 | 6.6E-09 | conf | conf | 1.5E-02 | 2.2E-06 | 7.7E-04 | -4.85 | -7.16 | 8.81 | -2.21 | 0.41 |
| 4585 | 163206-13.3  | Hexane, 1,6-disulfoxanate, homopolymer, 3,5-dimethyl-H-pyrazole-blocked                                                      | 233 | 87 | 9.9E-03 | 1.5E-03 | 3.0E-02 | 1.40 | 3.5E-06 | 1.3E-07 | 6.6E-09 | conf | conf | 1.5E-02 | 2.2E-06 | 7.7E-04 | -4.86 | -7.16 | 8.81 | -2.25 | 0.64 |
| 4586 | 68201-40.5   | Rosin acids and Rosin acids, mono-C12-18 alkyl esters                                                                        | 233 | 87 | 9.9E-03 | 1.5E-03 | 3.0E-02 | 1.40 | 3.5E-06 | 1.3E-07 | 6.6E-09 | conf | conf | 1.5E-02 | 2.2E-06 | 7.7E-04 |       |       |      |       |      |

|      |             |                                                                                                                                |     |    |         |         |         |      |         |         |         |      |      |         |         |         |       |       |       |       |      |
|------|-------------|--------------------------------------------------------------------------------------------------------------------------------|-----|----|---------|---------|---------|------|---------|---------|---------|------|------|---------|---------|---------|-------|-------|-------|-------|------|
| 4718 | 68938-00    | Soybean oil, deodorized distillate                                                                                             | 223 | 87 | 9.9E-03 | 1.5E-03 | 3.0E-02 | 1.40 | 3.5E-06 | 1.3E-07 | 6.6E-09 | conf | conf | 7.5E-01 | 1.1E+00 | 3.8E-01 | -7.15 | -7.46 | -9.11 | -1.00 | 0.64 |
| 4719 | 27230-01-8  | 0,2,4-tri-tert-butylphenyl ether, diol                                                                                         | 223 | 87 | 9.9E-03 | 1.5E-03 | 3.0E-02 | 1.40 | 3.5E-06 | 1.3E-07 | 6.6E-09 | conf | conf | 7.5E-01 | 1.1E+00 | 3.8E-01 | -7.15 | -7.46 | -9.11 | -0.41 | 0.60 |
| 4720 | 68603-75-8  | Amines, N-tallow alkylthioethylenedi-, propargylated                                                                           | 223 | 87 | 9.9E-03 | 1.5E-03 | 3.0E-02 | 1.40 | 3.5E-06 | 1.3E-07 | 6.6E-09 | conf | conf | 7.4E-01 | 1.0E+00 | 3.7E-01 | -7.16 | -7.46 | -9.11 | -0.99 | 0.45 |
| 4721 | 91050-08-3  | Fatty acids, C16-18, triesters with trimethylolpropane                                                                         | 223 | 87 | 9.9E-03 | 1.5E-03 | 3.0E-02 | 1.40 | 3.5E-06 | 1.3E-07 | 6.6E-09 | conf | conf | 7.4E-01 | 1.0E+00 | 3.7E-01 | -7.16 | -7.46 | -9.11 | -1.84 | 0.64 |
| 4722 | 64147-0-6   | Castor oil, dehydrated                                                                                                         | 223 | 87 | 9.9E-03 | 1.5E-03 | 3.0E-02 | 1.40 | 3.5E-06 | 1.3E-07 | 6.6E-09 | conf | conf | 7.4E-01 | 1.0E+00 | 3.7E-01 | -7.16 | -7.47 | -9.12 | -0.41 | 0.64 |
| 4723 | 172322-64-1 | C16-18even numberedalkylthioethylenediol acetate                                                                               | 223 | 87 | 9.9E-03 | 1.5E-03 | 3.0E-02 | 1.40 | 3.5E-06 | 1.3E-07 | 6.6E-09 | conf | conf | 7.4E-01 | 1.0E+00 | 3.7E-01 | -7.16 | -7.46 | -9.12 | -0.47 | 0.49 |
| 4724 | 73037-34-0  | disodium dimethylthioethylenesulphonate                                                                                        | 223 | 87 | 9.9E-03 | 1.5E-03 | 3.0E-02 | 1.40 | 3.5E-06 | 1.3E-07 | 6.6E-09 | conf | conf | 7.3E-01 | 1.0E+00 | 3.7E-01 | -7.16 | -7.47 | -9.12 | -0.95 | 0.64 |
| 4725 | 80939-02-4  | Amines, C11-14-branched alkyl-, monoether and diethyl phosphates                                                               | 223 | 87 | 9.9E-03 | 1.5E-03 | 3.0E-02 | 1.40 | 3.5E-06 | 1.3E-07 | 6.6E-09 | conf | conf | 7.3E-01 | 1.0E+00 | 3.7E-01 | -7.16 | -7.47 | -9.12 | -0.40 | 0.64 |
| 4726 | 158138-67-3 | Fatty acids, C16-18 and C18 unsat., Me esters, epoxidized                                                                      | 223 | 87 | 9.9E-03 | 1.5E-03 | 3.0E-02 | 1.40 | 3.5E-06 | 1.3E-07 | 6.6E-09 | conf | conf | 7.3E-01 | 1.0E+00 | 3.6E-01 | -7.16 | -7.47 | -9.12 | -0.25 | 0.74 |
| 4727 | 118000-30-9 | Quaternary ammonium salts, with fatty acids with 2-ethyl-2-(hydroxymethyl) 1,3-propanediol (3:1), 2-propanoate                 | 223 | 87 | 9.9E-03 | 1.5E-03 | 3.0E-02 | 1.40 | 3.5E-06 | 1.3E-07 | 6.6E-09 | conf | conf | 6.9E-01 | 9.5E-01 | 3.6E-01 | -7.17 | -7.47 | -9.12 | -1.87 | 0.64 |
| 4728 | 10089-41-6  | Aromatic hydrocarbons, C10, C18-ch                                                                                             | 223 | 87 | 9.9E-03 | 1.5E-03 | 3.0E-02 | 1.40 | 3.5E-06 | 1.3E-07 | 6.6E-09 | conf | conf | 7.3E-01 | 1.0E+00 | 3.6E-01 | -7.17 | -7.47 | -9.12 | -0.70 | 0.22 |
| 4729 | 85049-3-8   | Fatty acids, C18 and C18 unsat., esters with pentaerythritol                                                                   | 223 | 87 | 9.9E-03 | 1.5E-03 | 3.0E-02 | 1.40 | 3.5E-06 | 1.3E-07 | 6.6E-09 | conf | conf | 7.2E-01 | 1.0E+00 | 3.6E-01 | -7.17 | -7.47 | -9.13 | -1.84 | 0.64 |
| 4730 | 160001-09-7 | Alcohols, C9-11, branched and linear, polyoxetolated                                                                           | 223 | 87 | 9.9E-03 | 1.5E-03 | 3.0E-02 | 1.40 | 3.5E-06 | 1.3E-07 | 6.6E-09 | conf | conf | 7.1E-01 | 9.8E-01 | 3.6E-01 | -7.17 | -7.48 | -9.13 | -0.16 | 0.64 |
| 4731 | 67989-52-0  | 4-Isopropylphenylphosphonol, oligomeric reaction products with 1-chloro-2-epoxypropane, reaction products with                 | 223 | 87 | 9.9E-03 | 1.5E-03 | 3.0E-02 | 1.40 | 3.5E-06 | 1.3E-07 | 6.6E-09 | conf | conf | 7.0E-01 | 9.8E-01 | 3.5E-01 | -7.18 | -7.49 | -9.14 | -1.84 | 0.64 |
| 4732 | 138485-91-3 | 2-Propanoic acid, reaction products with pentaerythritol                                                                       | 223 | 87 | 9.9E-03 | 1.5E-03 | 3.0E-02 | 1.40 | 3.5E-06 | 1.3E-07 | 6.6E-09 | conf | conf | 7.0E-01 | 9.7E-01 | 3.5E-01 | -7.18 | -7.49 | -9.14 | -1.75 | 0.22 |
| 4733 | 91722-14-4  | Soybean oil, epoxidized, acinar                                                                                                | 223 | 87 | 9.9E-03 | 1.5E-03 | 3.0E-02 | 1.40 | 3.5E-06 | 1.3E-07 | 6.6E-09 | conf | conf | 6.9E-01 | 9.7E-01 | 3.5E-01 | -7.19 | -7.50 | -9.15 | -0.59 | 0.64 |
| 4734 | 2616-40-5   | Ethylendiamine, ethoxylated and propoxylated                                                                                   | 223 | 87 | 9.9E-03 | 1.5E-03 | 3.0E-02 | 1.40 | 3.5E-06 | 1.3E-07 | 6.6E-09 | conf | conf | 6.9E-01 | 9.6E-01 | 3.4E-01 | -7.19 | -7.50 | -9.15 | -0.26 | 1.16 |
| 4735 | 25359-01-3  | decane                                                                                                                         | 223 | 87 | 9.9E-03 | 1.5E-03 | 3.0E-02 | 1.40 | 3.5E-06 | 1.3E-07 | 6.6E-09 | conf | conf | 6.8E-01 | 9.5E-01 | 3.4E-01 | -7.20 | -7.50 | -9.15 | -0.68 | 1.28 |
| 4736 | 31851-53-5  | 2-Oxepanone, polymer with 1,4-butanediol                                                                                       | 223 | 87 | 9.9E-03 | 1.5E-03 | 3.0E-02 | 1.40 | 3.5E-06 | 1.3E-07 | 6.6E-09 | conf | conf | 6.8E-01 | 9.4E-01 | 3.4E-01 | -7.20 | -7.50 | -9.16 | -0.82 | 0.30 |
| 4737 | 68931-0E-2  | Alcohols, C9-14, w-perfluoro                                                                                                   | 223 | 87 | 9.9E-03 | 1.5E-03 | 3.0E-02 | 1.40 | 3.5E-06 | 1.3E-07 | 6.6E-09 | conf | conf | 6.7E-01 | 9.4E-01 | 3.4E-01 | -7.20 | -7.50 | -9.16 | -1.30 | 0.28 |
| 4738 | 25448-25-3  | Triisopropyl phosphite                                                                                                         | 223 | 87 | 9.9E-03 | 1.5E-03 | 3.0E-02 | 1.40 | 3.5E-06 | 1.3E-07 | 6.6E-09 | conf | conf | 6.7E-01 | 9.4E-01 | 3.4E-01 | -7.20 | -7.51 | -9.16 | -1.84 | 0.64 |
| 4739 | 61789-45-5  | Fatty acids, dehydrated castor oil                                                                                             | 223 | 87 | 9.9E-03 | 1.5E-03 | 3.0E-02 | 1.40 | 3.5E-06 | 1.3E-07 | 6.6E-09 | conf | conf | 6.7E-01 | 9.3E-01 | 3.3E-01 | -7.20 | -7.51 | -9.16 | -0.22 | 1.19 |
| 4740 | 6310-16-7   | 9-Carabazenoic acid-10-, monoester with 1,2,3-propanetriol ester with boric acid [BBOCO]                                       | 223 | 87 | 9.9E-03 | 1.5E-03 | 3.0E-02 | 1.40 | 3.5E-06 | 1.3E-07 | 6.6E-09 | conf | conf | 6.6E-01 | 9.3E-01 | 3.3E-01 | -7.20 | -7.51 | -9.16 | -0.60 | 0.40 |
| 4741 | 41637-18-1  | Poly(2,2-ethynyl-1,3-bis[4-(10-methylphenyl)butyl-5-phenyl]bis[4-(10-methyl-5-oxo-2-pyeno-1-yl)]-1,3-ethylenediol              | 223 | 87 | 9.9E-03 | 1.5E-03 | 3.0E-02 | 1.40 | 3.5E-06 | 1.3E-07 | 6.6E-09 | conf | conf | 6.6E-01 | 9.2E-01 | 3.3E-01 | -7.21 | -7.51 | -9.17 | -0.17 | 0.64 |
| 4742 | 68425-34-3  | Petroleum [petroleum], oxidized, calcium salt                                                                                  | 223 | 87 | 9.9E-03 | 1.5E-03 | 3.0E-02 | 1.40 | 3.5E-06 | 1.3E-07 | 6.6E-09 | conf | conf | 6.6E-01 | 9.2E-01 | 3.3E-01 | -7.21 | -7.52 | -9.17 | -0.17 | 1.10 |
| 4743 | 68565-56-9  | Hydrocarbons, C10-18, branched and linear, polyoxetolated                                                                      | 223 | 87 | 9.9E-03 | 1.5E-03 | 3.0E-02 | 1.40 | 3.5E-06 | 1.3E-07 | 6.6E-09 | conf | conf | 6.6E-01 | 9.2E-01 | 3.3E-01 | -7.21 | -7.52 | -9.17 | -0.44 | 0.64 |
| 4744 | 68122-64-5  | Soybean oil, polyind.                                                                                                          | 223 | 87 | 9.9E-03 | 1.5E-03 | 3.0E-02 | 1.40 | 3.5E-06 | 1.3E-07 | 6.6E-09 | conf | conf | 6.6E-01 | 9.2E-01 | 3.3E-01 | -7.21 | -7.52 | -9.17 | -0.55 | 1.28 |
| 4745 | 94607-31-1  | Poly(2,2-1,2-ethynyl-1,3-bis[4-(10-methylphenyl)butyl-5-phenyl]bis[4-(10-methyl-5-oxo-2-pyeno-1-yl)]-1,3-ethylenediol          | 223 | 87 | 9.9E-03 | 1.5E-03 | 3.0E-02 | 1.40 | 3.5E-06 | 1.3E-07 | 6.6E-09 | conf | conf | 6.6E-01 | 9.2E-01 | 3.3E-01 | -7.21 | -7.52 | -9.17 | -1.68 | 0.40 |
| 4746 | 67762-53-2  | Fatty acids, C9-9, tetraesters with pentaerythritol                                                                            | 223 | 87 | 9.9E-03 | 1.5E-03 | 3.0E-02 | 1.40 | 3.5E-06 | 1.3E-07 | 6.6E-09 | conf | conf | 6.6E-01 | 9.1E-01 | 3.3E-01 | -7.22 | -7.53 | -9.17 | -1.34 | 1.14 |
| 4747 | 71662-46-9  | 1,2-Benzenedicarboxylic acid, di-C18-alkyl esters                                                                              | 223 | 87 | 9.9E-03 | 1.5E-03 | 3.0E-02 | 1.40 | 3.5E-06 | 1.3E-07 | 6.6E-09 | conf | conf | 6.4E-01 | 8.9E-01 | 3.2E-01 | -7.22 | -7.53 | -9.18 | -0.29 | 0.77 |
| 4748 | 75782-01-5  | Alcohols, C14-15                                                                                                               | 223 | 87 | 9.9E-03 | 1.5E-03 | 3.0E-02 | 1.40 | 3.5E-06 | 1.3E-07 | 6.6E-09 | conf | conf | 6.4E-01 | 8.9E-01 | 3.2E-01 | -7.22 | -7.53 | -9.18 | -0.88 | 0.64 |
| 4749 | 65996-87-4  | Extract residues (coal), tar oil, alk.                                                                                         | 223 | 87 | 9.9E-03 | 1.5E-03 | 3.0E-02 | 1.40 | 3.5E-06 | 1.3E-07 | 6.6E-09 | conf | conf | 6.4E-01 | 8.9E-01 | 3.2E-01 | -7.22 | -7.53 | -9.18 | -1.64 | 0.64 |
| 4750 | 3010-96-6   | 2,2,4,4-tetrahydroxybutane-1,3-diol, mixed isomers                                                                             | 223 | 87 | 9.9E-03 | 1.5E-03 | 3.0E-02 | 1.40 | 3.5E-06 | 1.3E-07 | 6.6E-09 | conf | conf | 6.4E-01 | 8.9E-01 | 3.2E-01 | -7.22 | -7.53 | -9.18 | -0.46 | 0.64 |
| 4751 | 96152-43-1  | Phenol, decetyl-, sulfonated                                                                                                   | 223 | 87 | 9.9E-03 | 1.5E-03 | 3.0E-02 | 1.40 | 3.5E-06 | 1.3E-07 | 6.6E-09 | conf | conf | 6.3E-01 | 8.8E-01 | 3.2E-01 | -7.22 | -7.53 | -9.18 | -0.16 | 0.64 |
| 4752 | 122-32-7    | 1,2,3-Propanetriol triacetate                                                                                                  | 223 | 87 | 9.9E-03 | 1.5E-03 | 3.0E-02 | 1.40 | 3.5E-06 | 1.3E-07 | 6.6E-09 | conf | conf | 6.3E-01 | 8.8E-01 | 3.2E-01 | -7.23 | -7.53 | -9.18 | -1.84 | 0.64 |
| 4753 | 93129-58-8  | Resin acids and rosin acids, reaction products with formaldehyde, potassium salt                                               | 223 | 87 | 9.9E-03 | 1.5E-03 | 3.0E-02 | 1.40 | 3.5E-06 | 1.3E-07 | 6.6E-09 | conf | conf | 6.3E-01 | 8.8E-01 | 3.2E-01 | -7.23 | -7.53 | -9.19 | -1.87 | 1.14 |
| 4754 | 61791-12-6  | Castor oil, ethoxylated                                                                                                        | 223 | 87 | 9.9E-03 | 1.5E-03 | 3.0E-02 | 1.40 | 3.5E-06 | 1.3E-07 | 6.6E-09 | conf | conf | 6.3E-01 | 8.8E-01 | 3.2E-01 | -7.23 | -7.54 | -9.19 | -0.24 | 0.64 |
| 4755 | 85586-34-1  | Soybean oil, epoxidized, ester with ethylene glycol                                                                            | 223 | 87 | 9.9E-03 | 1.5E-03 | 3.0E-02 | 1.40 | 3.5E-06 | 1.3E-07 | 6.6E-09 | conf | conf | 6.3E-01 | 8.7E-01 | 3.1E-01 | -7.23 | -7.54 | -9.19 | -0.92 | 1.15 |
| 4756 | 100476-00-4 | Reaction products of amine, 4-diamine and methyl 2,2,4,4-tetrafluoro-6-carbamate and sodium methanols                          | 223 | 87 | 9.9E-03 | 1.5E-03 | 3.0E-02 | 1.40 | 3.5E-06 | 1.3E-07 | 6.6E-09 | conf | conf | 6.3E-01 | 8.7E-01 | 3.1E-01 | -7.23 | -7.54 | -9.19 | -0.50 | 0.64 |
| 4757 | 85029-52-3  | Acacia meansi, ester-, reaction products with ammonium chloride and formaldehyde                                               | 223 | 87 | 9.9E-03 | 1.5E-03 | 3.0E-02 | 1.40 | 3.5E-06 | 1.3E-07 | 6.6E-09 | conf | conf | 6.2E-01 | 8.6E-01 | 3.1E-01 | -7.24 | -7.54 | -9.19 | -1.64 | 0.33 |
| 4758 | 85836-92-1  | Fatty acids, C18 and C18 unsat., mixed esters with neopentyl glycol and trimethylolpropane                                     | 223 | 87 | 9.9E-03 | 1.5E-03 | 3.0E-02 | 1.40 | 3.5E-06 | 1.3E-07 | 6.6E-09 | conf | conf | 6.1E-01 | 8.5E-01 | 3.1E-01 | -7.24 | -7.55 | -9.20 | -0.17 | 0.76 |
| 4759 | 90506-0-9   | Phenol, decetyl-, sulfonated                                                                                                   | 223 | 87 | 9.9E-03 | 1.5E-03 | 3.0E-02 | 1.40 | 3.5E-06 | 1.3E-07 | 6.6E-09 | conf | conf | 6.1E-01 | 8.5E-01 | 3.1E-01 | -7.24 | -7.55 | -9.20 | -0.19 | 0.79 |
| 4760 | 94109-97-1  | 2-[2,2-bis[4-(10-oxo-1,3-bis[4-(10-methylphenyl)butyl-5-phenyl]bis[4-(10-methyl-5-oxo-2-pyeno-1-yl)]-1,3-ethylenediol]acrylate | 223 | 87 | 9.9E-03 | 1.5E-03 | 3.0E-02 | 1.40 | 3.5E-06 | 1.3E-07 | 6.6E-09 | conf | conf | 6.1E-01 | 8.5E-01 | 3.0E-01 | -7.24 | -7.55 | -9.20 | -2.90 | 0.64 |
| 4761 | 122689-49-8 | Fatty acids, C18-unsaturated, reaction products with amines, polyethylene glycol, [trimethylenetetramine, pentaerythritol]     | 223 | 87 | 9.9E-03 | 1.5E-03 | 3.0E-02 | 1.40 | 3.5E-06 | 1.3E-07 | 6.6E-09 | conf | conf | 6.1E-01 | 8.4E-01 | 3.0E-01 | -7.24 | -7.55 | -9.20 | -0.06 | 0.54 |
| 4762 | 67762-53-2  | Fatty acids, C9-9, tetraesters with pentaerythritol                                                                            | 223 | 87 | 9.9E-03 | 1.5E-03 | 3.0E-02 | 1.40 | 3.5E-06 | 1.3E-07 | 6.6E-09 | conf | conf | 6.0E-01 | 8.4E-01 | 3.0E-01 | -7.24 | -7.55 | -9.20 | -0.18 | 0.64 |
| 4763 | 81511-46-2  | Fatty acids, C18-18 and C18 unsat., maleated                                                                                   | 223 | 87 | 9.9E-03 | 1.5E-03 | 3.0E-02 | 1.40 | 3.5E-06 | 1.3E-07 | 6.6E-09 | conf | conf | 6.0E-01 | 8.4E-01 | 3.0E-01 | -7.25 | -7.56 | -9.21 | -1.04 | 0.83 |
| 4764 | 68111-40-8  | Alcohols, C11-15, branched and linear, polyoxetolated                                                                          | 223 | 87 | 9.9E-03 | 1.5E-03 | 3.0E-02 | 1.40 | 3.5E-06 | 1.3E-07 | 6.6E-09 | conf | conf | 5.9E-01 | 8.3E-01 | 3.0E-01 | -7.25 | -7.56 | -9.21 | -0.45 | 0.64 |
| 4765 | 68111-72-6  | Polysiloxanes, alcohols, esters with triethanolamine, sodium salts                                                             | 223 | 87 | 9.9E-03 | 1.5E-03 | 3.0E-02 | 1.40 | 3.5E-06 | 1.3E-07 | 6.6E-09 | conf | conf | 5.8E-01 | 8.1E-01 | 2.9E-01 | -7.26 | -7.57 | -9.22 | -0.15 | 0.79 |
| 4766 | 68187-8-8   | Castor oil, oxidized                                                                                                           | 223 | 87 | 9.9E-03 | 1.5E-03 | 3.0E-02 | 1.40 | 3.5E-06 | 1.3E-07 | 6.6E-09 | conf | conf | 5.8E-01 | 8.1E-01 | 2.9E-01 | -7.26 | -7.57 | -9.22 | -0.87 | 0.72 |
| 4767 | 144086-02-2 | 2-Propanoic acid, polymer with 2,2-bis(hydroxymethyl) 1,3-propanediol, methoxylated and oxetane                                | 223 | 87 | 9.9E-03 | 1.5E-03 | 3.0E-02 | 1.40 | 3.5E-06 | 1.3E-07 | 6.6E-09 | conf | conf | 5.7E-01 | 8.0E-01 | 2.9E-01 | -7.27 | -7.58 | -9.23 | -0.49 | 0.79 |
| 4768 | 68002-46-2  | 4-Isopropylphenylphosphonol, oligomeric reaction products with 1-chloro-2-epoxypropane, reaction products with                 | 223 | 87 | 9.9E-03 | 1.5E-03 | 3.0E-02 | 1.40 | 3.5E-06 | 1.3E-07 | 6.6E-09 | conf |      |         |         |         |       |       |       |       |      |

|      |              |                                                                                                                                                                     |      |    |         |         |         |      |         |         |         |      |      |         |         |         |       |       |       |       |      |
|------|--------------|---------------------------------------------------------------------------------------------------------------------------------------------------------------------|------|----|---------|---------|---------|------|---------|---------|---------|------|------|---------|---------|---------|-------|-------|-------|-------|------|
| 4901 | 26301-10-0   | Oxirane, 2-methyl-, polymer with oxirane, ether with 8-O- <i>tert</i> -butylfuranosyl- <i>o</i> -D-glucopyranoside                                                  | 2323 | 87 | 9.9E-03 | 1.5E-03 | 3.0E-02 | 1.40 | 3.5E-06 | 1.3E-07 | 6.6E-09 | conf | conf | 2.9E-01 | 4.0E-01 | 1.4E-01 | -7.57 | -7.88 | -9.53 | 0.04  | 0.81 |
| 4902 | 29253-39-9   | Isopropylmethane                                                                                                                                                    | 2323 | 87 | 9.9E-03 | 1.5E-03 | 3.0E-02 | 1.40 | 3.5E-06 | 1.3E-07 | 6.6E-09 | conf | conf | 2.9E-01 | 4.0E-01 | 1.4E-01 | -7.57 | -7.88 | -9.53 | 0.04  | 0.81 |
| 4903 | 84082-70-2   | Peppermint, etc.                                                                                                                                                    | 2323 | 87 | 9.9E-03 | 1.5E-03 | 3.0E-02 | 1.40 | 3.5E-06 | 1.3E-07 | 6.6E-09 | conf | conf | 2.9E-01 | 4.0E-01 | 1.4E-01 | -7.57 | -7.88 | -9.53 | -2.54 | 0.64 |
| 4904 | 92128-40-0   | Glycerides, C10-20 and C10-20-unsat., oxidized                                                                                                                      | 2323 | 87 | 9.9E-03 | 1.5E-03 | 3.0E-02 | 1.40 | 3.5E-06 | 1.3E-07 | 6.6E-09 | conf | conf | 2.9E-01 | 3.9E-01 | 1.4E-01 | -7.57 | -7.88 | -9.53 | -0.44 | 0.64 |
| 4905 | 68821-51-7   | 2-Butenedioic acid (E), di-C18-18-alkyl esters                                                                                                                      | 2323 | 87 | 9.9E-03 | 1.5E-03 | 3.0E-02 | 1.40 | 3.5E-06 | 1.3E-07 | 6.6E-09 | conf | conf | 2.9E-01 | 3.9E-01 | 1.4E-01 | -7.58 | -7.88 | -9.53 | -0.44 | 0.64 |
| 4906 | 84418-71-3   | Phosphoric acid, mono- and bis-branched and linear pentyl esters                                                                                                    | 2323 | 87 | 9.9E-03 | 1.5E-03 | 3.0E-02 | 1.40 | 3.5E-06 | 1.3E-07 | 6.6E-09 | conf | conf | 2.9E-01 | 3.9E-01 | 1.4E-01 | -7.58 | -7.88 | -9.54 | -0.93 | 0.33 |
| 4907 | 68133-91-1   | Benzene, 1,2-dicarboxylic acid 1,2-anhydride, oligomeric reaction products with ethane-1,2-diol and glycerol                                                        | 2323 | 87 | 9.9E-03 | 1.5E-03 | 3.0E-02 | 1.40 | 3.5E-06 | 1.3E-07 | 6.6E-09 | conf | conf | 2.9E-01 | 3.9E-01 | 1.4E-01 | -7.58 | -7.89 | -9.54 | -1.84 | 0.64 |
| 4908 | 68440-25-5   | Phosphoric acid, mono- and bis-branched and linear pentyl esters                                                                                                    | 2323 | 87 | 9.9E-03 | 1.5E-03 | 3.0E-02 | 1.40 | 3.5E-06 | 1.3E-07 | 6.6E-09 | conf | conf | 2.9E-01 | 3.9E-01 | 1.4E-01 | -7.58 | -7.89 | -9.54 | -1.84 | 0.64 |
| 4909 | 68517-10-2   | 1,6-Hexadecane                                                                                                                                                      | 2323 | 87 | 9.9E-03 | 1.5E-03 | 3.0E-02 | 1.40 | 3.5E-06 | 1.3E-07 | 6.6E-09 | conf | conf | 2.71    | 3.8E-01 | 1.4E-01 | -7.59 | -7.90 | -9.55 | -1.84 | 0.64 |
| 4910 | 160901-12-2  | Fatty acids, C18-unsat., dimers, hydroperoxide, dimethyl esters                                                                                                     | 2323 | 87 | 9.9E-03 | 1.5E-03 | 3.0E-02 | 1.40 | 3.5E-06 | 1.3E-07 | 6.6E-09 | conf | conf | 2.71    | 3.8E-01 | 1.4E-01 | -7.59 | -7.90 | -9.55 | -1.84 | 0.64 |
| 4911 | 81457-65-0   | Copper, [29H,31H-phthaloylanilato-2]-N(29,30,N(31,N(32)), [3-[(1-methylthio)propyl]amino]sulfonol deriv.                                                            | 2323 | 87 | 9.9E-03 | 1.5E-03 | 3.0E-02 | 1.40 | 3.5E-06 | 1.3E-07 | 6.6E-09 | conf | conf | 2.71    | 3.8E-01 | 1.4E-01 | -7.59 | -7.90 | -9.55 | -1.84 | 0.64 |
| 4912 | 101896-72-9  | Disulfates (cont. tal), naphthalene alkyl, methylphthalate fraction                                                                                                 | 2323 | 87 | 9.9E-03 | 1.5E-03 | 3.0E-02 | 1.40 | 3.5E-06 | 1.3E-07 | 6.6E-09 | conf | conf | 2.71    | 3.8E-01 | 1.4E-01 | -7.59 | -7.90 | -9.55 | -1.89 | 0.88 |
| 4913 | 161149-28-8  | Unknown                                                                                                                                                             | 2323 | 87 | 9.9E-03 | 1.5E-03 | 3.0E-02 | 1.40 | 3.5E-06 | 1.3E-07 | 6.6E-09 | conf | conf | 2.71    | 3.8E-01 | 1.4E-01 | -7.59 | -7.90 | -9.55 | -1.89 | 0.88 |
| 4914 | 1229648-881  | Condensation prod. of N-C18-alkylpropane-1,3-diamine, N-1-aminopropyl-N-C12-C18-alkylpropane-1,3-diamin                                                             | 2323 | 87 | 9.9E-03 | 1.5E-03 | 3.0E-02 | 1.40 | 3.5E-06 | 1.3E-07 | 6.6E-09 | conf | conf | 2.71    | 3.8E-01 | 1.4E-01 | -7.59 | -7.90 | -9.55 | -1.88 | 0.60 |
| 4915 | 25360-10-5   | 1,1-dimethylphosphazene                                                                                                                                             | 2323 | 87 | 9.9E-03 | 1.5E-03 | 3.0E-02 | 1.40 | 3.5E-06 | 1.3E-07 | 6.6E-09 | conf | conf | 2.71    | 3.8E-01 | 1.4E-01 | -7.59 | -7.90 | -9.55 | -1.87 | 0.60 |
| 4916 | 85114-00-7   | 2-methylhexanoic acid, monomer with propane-1,2-diol                                                                                                                | 2323 | 87 | 9.9E-03 | 1.5E-03 | 3.0E-02 | 1.40 | 3.5E-06 | 1.3E-07 | 6.6E-09 | conf | conf | 2.71    | 3.8E-01 | 1.3E-01 | -7.61 | -7.92 | -9.57 | -1.31 | 0.58 |
| 4917 | 6811-04-1    | Copper, [29H,31H-phthaloylanilato-2]-N(29,30,N(31,N(32)), [3-dimethylamino]propyl]amino]sulfonol deriv.                                                             | 2323 | 87 | 9.9E-03 | 1.5E-03 | 3.0E-02 | 1.40 | 3.5E-06 | 1.3E-07 | 6.6E-09 | conf | conf | 2.71    | 3.7E-01 | 1.3E-01 | -7.60 | -7.90 | -9.56 | -1.84 | 0.64 |
| 4918 | 91022-07-2   | Fatty acids, C16-18, branched salts                                                                                                                                 | 2323 | 87 | 9.9E-03 | 1.5E-03 | 3.0E-02 | 1.40 | 3.5E-06 | 1.3E-07 | 6.6E-09 | conf | conf | 2.71    | 3.7E-01 | 1.3E-01 | -7.60 | -7.91 | -9.56 | -1.58 | 0.53 |
| 4919 | 25640-78-2   | 1-methylthio-1,1'-biphenyl                                                                                                                                          | 2323 | 87 | 9.9E-03 | 1.5E-03 | 3.0E-02 | 1.40 | 3.5E-06 | 1.3E-07 | 6.6E-09 | conf | conf | 2.7E-01 | 3.7E-01 | 1.3E-01 | -7.60 | -7.91 | -9.56 | -3.61 | 0.20 |
| 4920 | 68213-2-0    | Alcohols, C12-18, ethoxylated                                                                                                                                       | 2323 | 87 | 9.9E-03 | 1.5E-03 | 3.0E-02 | 1.40 | 3.5E-06 | 1.3E-07 | 6.6E-09 | conf | conf | 2.6E-01 | 3.7E-01 | 1.3E-01 | -7.61 | -7.91 | -9.56 | -1.39 | 0.37 |
| 4921 | 1419212-76   | Reaction products of oil of fatty acids with diethylenetriamine and maleic anhydride                                                                                | 2323 | 87 | 9.9E-03 | 1.5E-03 | 3.0E-02 | 1.40 | 3.5E-06 | 1.3E-07 | 6.6E-09 | conf | conf | 2.6E-01 | 3.7E-01 | 1.3E-01 | -7.61 | -7.91 | -9.56 | -1.84 | 0.64 |
| 4922 | 61791-39-7   | 11-imidazole-1-ethanol, 4,5-dihydro-, 2-ortho-alkyl deriv.                                                                                                          | 2323 | 87 | 9.9E-03 | 1.5E-03 | 3.0E-02 | 1.40 | 3.5E-06 | 1.3E-07 | 6.6E-09 | conf | conf | 2.6E-01 | 3.7E-01 | 1.3E-01 | -7.61 | -7.92 | -9.57 | -3.38 | 0.60 |
| 4923 | 63705-03-9   | 1,2,3-Propanetriol, homopolymer, disulfide, decanoate                                                                                                               | 2323 | 87 | 9.9E-03 | 1.5E-03 | 3.0E-02 | 1.40 | 3.5E-06 | 1.3E-07 | 6.6E-09 | conf | conf | 2.6E-01 | 3.7E-01 | 1.3E-01 | -7.61 | -7.92 | -9.57 | -4.39 | 0.83 |
| 4924 | 85336-06-7   | Glycerides, C18                                                                                                                                                     | 2323 | 87 | 9.9E-03 | 1.5E-03 | 3.0E-02 | 1.40 | 3.5E-06 | 1.3E-07 | 6.6E-09 | conf | conf | 2.6E-01 | 3.7E-01 | 1.3E-01 | -7.61 | -7.92 | -9.57 | -1.31 | 0.58 |
| 4925 | 86002-61-9   | Quaternary ammonium compounds, (C16-18 and C18-unsat., alkyl)trimethyl, chlorides                                                                                   | 2323 | 87 | 9.9E-03 | 1.5E-03 | 3.0E-02 | 1.40 | 3.5E-06 | 1.3E-07 | 6.6E-09 | conf | conf | 2.6E-01 | 3.6E-01 | 1.3E-01 | -7.61 | -7.92 | -9.57 | -4.03 | 0.87 |
| 4926 | 8007-43-0    | Sorbitan, (2)-8-oxadecanoate (2:3)                                                                                                                                  | 2323 | 87 | 9.9E-03 | 1.5E-03 | 3.0E-02 | 1.40 | 3.5E-06 | 1.3E-07 | 6.6E-09 | conf | conf | 2.6E-01 | 3.6E-01 | 1.3E-01 | -7.62 | -7.92 | -9.57 | -0.79 | 0.59 |
| 4927 | 147900-93-4  | Fatty acids, C18-unsat., trimers, comuls. with olefinamine                                                                                                          | 2323 | 87 | 9.9E-03 | 1.5E-03 | 3.0E-02 | 1.40 | 3.5E-06 | 1.3E-07 | 6.6E-09 | conf | conf | 2.6E-01 | 3.6E-01 | 1.3E-01 | -7.62 | -7.92 | -9.57 | -1.19 | 0.49 |
| 4928 | 68137-30-4   | 1-Glutamic acid, N-coo alkyl deriv., disodium salts                                                                                                                 | 2323 | 87 | 9.9E-03 | 1.5E-03 | 3.0E-02 | 1.40 | 3.5E-06 | 1.3E-07 | 6.6E-09 | conf | conf | 2.6E-01 | 3.6E-01 | 1.3E-01 | -7.62 | -7.92 | -9.57 | -1.16 | 0.30 |
| 4929 | 91144-39-7   | Glycerides, C18 mono-, di- and tri-, hydrogenated, strates, sodium salts                                                                                            | 2323 | 87 | 9.9E-03 | 1.5E-03 | 3.0E-02 | 1.40 | 3.5E-06 | 1.3E-07 | 6.6E-09 | conf | conf | 2.6E-01 | 3.6E-01 | 1.3E-01 | -7.62 | -7.92 | -9.57 | -4.50 | 0.84 |
| 4930 | 36425-16-8   | 4-4'-isopropylidenebis(hydroxy), oligomeric reaction products with 1-chloro-2,3-epoxypropane, reaction products with glycerides, polyol mono- and di-, hydrogenated | 2323 | 87 | 9.9E-03 | 1.5E-03 | 3.0E-02 | 1.40 | 3.5E-06 | 1.3E-07 | 6.6E-09 | conf | conf | 2.6E-01 | 3.6E-01 | 1.3E-01 | -7.62 | -7.93 | -9.58 | -0.07 | 1.21 |
| 4931 | 85865-09-6   | Fatty acids, C16-18, iso-Eu-esters                                                                                                                                  | 2323 | 87 | 9.9E-03 | 1.5E-03 | 3.0E-02 | 1.40 | 3.5E-06 | 1.3E-07 | 6.6E-09 | conf | conf | 2.6E-01 | 3.6E-01 | 1.3E-01 | -7.62 | -7.93 | -9.58 | -0.16 | 1.15 |
| 4932 | 85940-40-5   | Fatty acids, tail, iso-, reaction products with pentaerythritolhexamine                                                                                             | 2323 | 87 | 9.9E-03 | 1.5E-03 | 3.0E-02 | 1.40 | 3.5E-06 | 1.3E-07 | 6.6E-09 | conf | conf | 2.5E-01 | 3.6E-01 | 1.3E-01 | -7.62 | -7.93 | -9.58 | -2.56 | 0.20 |
| 4934 | 85146-10-3   | Fatty acids, C14-18 and C18-unsat., branched and linear, Am-esters                                                                                                  | 2323 | 87 | 9.9E-03 | 1.5E-03 | 3.0E-02 | 1.40 | 3.5E-06 | 1.3E-07 | 6.6E-09 | conf | conf | 2.5E-01 | 3.5E-01 | 1.3E-01 | -7.63 | -7.93 | -9.59 | -0.43 | 0.84 |
| 4935 | 61617-00-3   | 1,3-dihydro-4-oxo-1-methyl-2H-benzimidazole-2-thione, zinc salt                                                                                                     | 2323 | 87 | 9.9E-03 | 1.5E-03 | 3.0E-02 | 1.40 | 3.5E-06 | 1.3E-07 | 6.6E-09 | conf | conf | 2.5E-01 | 3.5E-01 | 1.3E-01 | -7.63 | -7.93 | -9.59 | -0.40 | 0.37 |
| 4936 | 68509-18-2   | Pyridinium, 2-(phenylmethyl)-, ethyl, dimethyl, zinc salts, chlorides                                                                                               | 2323 | 87 | 9.9E-03 | 1.5E-03 | 3.0E-02 | 1.40 | 3.5E-06 | 1.3E-07 | 6.6E-09 | conf | conf | 2.5E-01 | 3.4E-01 | 1.2E-01 | -7.64 | -7.93 | -9.59 | -2.39 | 1.78 |
| 4937 | 85711-44-1   | Fatty acids, C16-18 and C18-unsat., esters with pentaerythritol                                                                                                     | 2323 | 87 | 9.9E-03 | 1.5E-03 | 3.0E-02 | 1.40 | 3.5E-06 | 1.3E-07 | 6.6E-09 | conf | conf | 2.4E-01 | 3.3E-01 | 1.2E-01 | -7.65 | -7.93 | -9.60 | -2.31 | 0.68 |
| 4938 | 1219450-14-1 | N-3-methylpropan-1-ol-N-C16-18 (evennumbered), C18 unsaturated alkyl -propane-1,3-diamine                                                                           | 2323 | 87 | 9.9E-03 | 1.5E-03 | 3.0E-02 | 1.40 | 3.5E-06 | 1.3E-07 | 6.6E-09 | conf | conf | 2.4E-01 | 3.4E-01 | 1.2E-01 | -7.64 | -7.95 | -9.60 | -3.73 | 0.61 |
| 4939 | 2579-20-6    | 1,2-Cyclohexanediol                                                                                                                                                 | 2323 | 87 | 9.9E-03 | 1.5E-03 | 3.0E-02 | 1.40 | 3.5E-06 | 1.3E-07 | 6.6E-09 | conf | conf | 2.4E-01 | 3.4E-01 | 1.2E-01 | -7.64 | -7.95 | -9.60 | -1.84 | 0.64 |
| 4940 | 68153-02-6   | Nitriles, C12-22                                                                                                                                                    | 2323 | 87 | 9.9E-03 | 1.5E-03 | 3.0E-02 | 1.40 | 3.5E-06 | 1.3E-07 | 6.6E-09 | conf | conf | 2.4E-01 | 3.4E-01 | 1.2E-01 | -7.64 | -7.95 | -9.60 | -1.84 | 0.64 |
| 4941 | 218651-68-4  | Reaction products of coconut oil with polyethyleneimine and 2-ethyl-2-(hydroxymethyl)propane-1,3-diol                                                               | 2323 | 87 | 9.9E-03 | 1.5E-03 | 3.0E-02 | 1.40 | 3.5E-06 | 1.3E-07 | 6.6E-09 | conf | conf | 2.4E-01 | 3.4E-01 | 1.2E-01 | -7.64 | -7.95 | -9.60 | -1.36 | 0.39 |
| 4942 | 68308-74-7   | Aliphatic fatty acids, N,N-di-Me                                                                                                                                    | 2323 | 87 | 9.9E-03 | 1.5E-03 | 3.0E-02 | 1.40 | 3.5E-06 | 1.3E-07 | 6.6E-09 | conf | conf | 2.4E-01 | 3.4E-01 | 1.2E-01 | -7.65 | -7.97 | -9.62 | -1.84 | 0.64 |
| 4943 | 68081-91-4   | Alcohols, C12-18, ethoxylated, sulfates, sodium salts                                                                                                               | 2323 | 87 | 9.9E-03 | 1.5E-03 | 3.0E-02 | 1.40 | 3.5E-06 | 1.3E-07 | 6.6E-09 | conf | conf | 2.4E-01 | 3.3E-01 | 1.2E-01 | -7.65 | -7.96 | -9.61 | -2.04 | 0.50 |
| 4944 | 61791-42-2   | Ethanesulfonic acid, 2-(methylamino), N-coo alkyl deriv., sodium salts                                                                                              | 2323 | 87 | 9.9E-03 | 1.5E-03 | 3.0E-02 | 1.40 | 3.5E-06 | 1.3E-07 | 6.6E-09 | conf | conf | 2.4E-01 | 3.3E-01 | 1.2E-01 | -7.65 | -7.96 | -9.61 | -1.89 | 0.50 |
| 4945 | 122682-09-7  | Amines, fatty acids C18 unsat., reaction products with polyethylene amines                                                                                          | 2323 | 87 | 9.9E-03 | 1.5E-03 | 3.0E-02 | 1.40 | 3.5E-06 | 1.3E-07 | 6.6E-09 | conf | conf | 2.4E-01 | 3.3E-01 | 1.2E-01 | -7.65 | -7.96 | -9.61 | -1.89 | 0.50 |
| 4946 | 15927-73-8   | Fatty acids, C18-unsat., dimers, oligomeric reaction products with fatty acids, C16-18 and C18-unsat., branched a                                                   | 2323 | 87 | 9.9E-03 | 1.5E-03 | 3.0E-02 | 1.40 | 3.5E-06 | 1.3E-07 | 6.6E-09 | conf | conf | 2.4E-01 | 3.3E-01 | 1.2E-01 | -7.65 | -7.96 | -9.61 | -2.22 | 0.64 |
| 4947 | 61791-19-3   | Fatty acids, C18-unsat., dimers, reaction products with ethylene glycol, ethoxylated                                                                                | 2323 | 87 | 9.9E-03 | 1.5E-03 | 3.0E-02 | 1.40 | 3.5E-06 | 1.3E-07 | 6.6E-09 | conf | conf | 2.4E-01 | 3.3E-01 | 1.2E-01 | -7.65 | -7.96 | -9.61 | -2.22 | 0.64 |
| 4948 | 9525-22-8    | Phosphoric acid, mixed C12-18-alkyl and C14-18-unsat. alkyl deriv.                                                                                                  | 2323 | 87 | 9.9E-03 | 1.5E-03 | 3.0E-02 | 1.40 | 3.5E-06 | 1.3E-07 | 6.6E-09 | conf | conf | 2.4E-01 | 3.3E-01 | 1.2E-01 | -7.65 | -7.96 | -9.61 | -0.50 | 0.64 |
| 4949 | 93246-39-N   | N-methylthio-1,1'-biphenyl (3-hydroxyethyl)-2,2-dioxoacetic acid-4-ylureas                                                                                          | 2323 | 87 | 9.9E-03 | 1.5E-03 | 3.0E-02 | 1.40 | 3.5E-06 | 1.3E-07 | 6.6E-09 | conf | conf | 2.3E-01 | 3.2E-01 | 1.2E-01 | -7.66 | -7.97 | -9.62 | -1.29 | 0.67 |
| 4950 | 15447-08-2   | 2-ethylhexyl diglycol phosphate                                                                                                                                     | 2323 | 87 | 9.9E-03 | 1.5E-03 | 3.0E-02 | 1.40 | 3.5E-06 | 1.3E-07 | 6.6E-09 | conf | conf | 2.3E-01 | 3.2E-01 | 1.2E-01 | -7.66 | -7.97 | -9.62 | -1.84 | 0.64 |
| 4951 | 68988-45-4   | Phosphordithioic acid, mixed O-6-bis(2-ethylhexyl- and iso-Bu and pentyl) esters, zinc salts                                                                        | 2323 | 87 | 9.9E-03 | 1.5E-03 | 3.0E-02 | 1.40 | 3.5E-06 | 1.3E-07 | 6.6E-09 | conf | conf | 2.3E-01 | 3.2E-01 | 1.2E-01 | -7.66 | -7.97 | -9.62 | -2.27 | 0.50 |
| 4952 | 27614-17-7   |                                                                                                                                                                     |      |    |         |         |         |      |         |         |         |      |      |         |         |         |       |       |       |       |      |



|                                   |              |                                                         |     |     |         |         |         |      |         |         |         |      |      |         |         |         |        |         |         |         |      |
|-----------------------------------|--------------|---------------------------------------------------------|-----|-----|---------|---------|---------|------|---------|---------|---------|------|------|---------|---------|---------|--------|---------|---------|---------|------|
| 5267                              | 101541-04-2  | N-palmitoyloleucine                                     | 223 | 87  | 9.9E-03 | 1.5E-03 | 3.0E-02 | 1.40 | 3.5E-06 | 1.3E-07 | 6.6E-09 | conf | conf | 3.6E-02 | 5.1E-04 | 1.8E-02 | -10.46 | -10.77  | -12.42  | -1.84   | 0.64 |
| 5268                              | 1254940-85-1 | 3-(3-hydroxyethylthio)propanal                          | 223 | 87  | 9.9E-03 | 1.5E-03 | 3.0E-02 | 1.40 | 3.5E-06 | 1.3E-07 | 6.6E-09 | conf | conf | 3.5E-02 | 4.4E-04 | 1.7E-02 | -10.49 | -10.73  | -12.41  | -1.84   | 0.64 |
| 5269                              | 90480-71-0   | Pentadecanal, branched and linear                       | 223 | 87  | 9.9E-03 | 1.5E-03 | 3.0E-02 | 1.40 | 3.5E-06 | 1.3E-07 | 6.6E-09 | conf | conf | 1.2E-02 | 1.7E-04 | 5.9E-03 | -10.95 | -11.26  | -12.91  | -1.84   | 0.64 |
| 5270                              | 10305-38-1   | 3-(hexyloxy)propane-1,2-diol                            | 223 | 87  | 9.9E-03 | 1.5E-03 | 3.0E-02 | 1.40 | 3.5E-06 | 1.3E-07 | 6.6E-09 | conf | conf | 9.1E-04 | 1.3E-05 | 4.6E-04 | -12.07 | -12.37  | -14.03  | -1.84   | 0.64 |
| <b>BEACH - petroleum products</b> |              |                                                         |     |     |         |         |         |      |         |         |         |      |      |         |         |         |        |         |         |         |      |
| sum                               |              |                                                         | 326 | 326 | 326     | 326     | 326     | 326  | 326     | 326     | 326     | 326  | 326  | 326     | 326     | 326     | 326    | 326     | 326     | 326     | 326  |
| oil                               |              |                                                         |     |     |         |         |         |      |         |         |         |      |      |         |         |         |        |         |         |         |      |
| 2.5 p                             |              |                                                         |     |     |         |         |         |      |         |         |         |      |      |         |         |         |        |         |         |         |      |
| 50 p                              |              |                                                         |     |     |         |         |         |      |         |         |         |      |      |         |         |         |        |         |         |         |      |
| 87.5 p                            |              |                                                         |     |     |         |         |         |      |         |         |         |      |      |         |         |         |        |         |         |         |      |
| 5272                              | 68134-30-5   | Fuel, diesel                                            | 223 | 87  | 9.9E-03 | 1.5E-03 | 3.0E-02 |      | 3.5E-06 | 1.3E-07 | 6.6E-09 | conf | conf | 2.4E-02 | 1.1E-07 | 2.1E-04 |        |         |         |         |      |
| 5273                              | 68476-31-5   | Fuel oil, residual                                      | 223 | 87  | 9.9E-03 | 1.5E-03 | 3.0E-02 | 1.40 | 3.5E-06 | 1.3E-07 | 6.6E-09 | conf | conf | 1.8E-02 | 1.5E-03 | 3.0E-02 | 1.40   | 3.5E-06 | 1.3E-07 | 6.6E-09 | conf |
| 5274                              | 86290-81-5   | Gasoline                                                | 223 | 87  | 9.9E-03 | 1.5E-03 | 3.0E-02 | 1.40 | 3.5E-06 | 1.3E-07 | 6.6E-09 | conf | conf | 1.8E-02 | 1.5E-03 | 3.0E-02 | 1.40   | 3.5E-06 | 1.3E-07 | 6.6E-09 | conf |
| 5275                              | 800-20-6     | Kerosene (petroleum)                                    | 223 | 87  | 9.9E-03 | 1.5E-03 | 3.0E-02 | 1.40 | 3.5E-06 | 1.3E-07 | 6.6E-09 | conf | conf | 2.0E-02 | 1.6E-03 | 3.0E-02 | 1.40   | 3.5E-06 | 1.3E-07 | 6.6E-09 | conf |
| 5276                              | 68132-22-2   | Residues (petroleum), atmospheric                       | 223 | 87  | 9.9E-03 | 1.5E-03 | 3.0E-02 | 1.40 | 3.5E-06 | 1.3E-07 | 6.6E-09 | conf | conf | 8.7E-04 | 1.2E-03 | 2.1E-04 | -4.11  | -4.48   | -6.10   | -1.84   | 0.68 |
| 5277                              | 67411-45-3   | Residues (petroleum), atm. tower                        | 223 | 87  | 9.9E-03 | 1.5E-03 | 3.0E-02 | 1.40 | 3.5E-06 | 1.3E-07 | 6.6E-09 | conf | conf | 2.2E-05 | 2.9E-03 | 5.4E-04 | -3.71  | -4.09   | -5.71   | -1.84   | 0.98 |
| 5278                              | 6881487-9    | Distillates (petroleum), full-range straight-run middle | 223 | 87  | 9.9E-03 | 1.5E-03 | 3.0E-02 | 1.40 | 3.5E-06 | 1.3E-07 | 6.6E-09 | conf | conf | 1.9E-05 | 2.6E-03 | 5.1E-04 | -3.76  | -4.13   | -5.75   | -1.74   | 0.61 |
| 5279                              | 67413-577    | Gas oils (petroleum), heavy vacuum                      | 223 | 87  | 9.9E-03 | 1.5E-03 | 3.0E-02 | 1.40 | 3.5E-06 | 1.3E-07 | 6.6E-09 | conf | conf | 2.0E-05 | 2.6E-03 | 4.8E-04 | -3.75  | -4.13   | -5.75   | -1.84   | 0.98 |
| 5280                              | 67411-42-0   | Naphtha (petroleum), full-range straight-run            | 223 | 87  | 9.9E-03 | 1.5E-03 | 3.0E-02 | 1.40 | 3.5E-06 | 1.3E-07 | 6.6E-09 | conf | conf | 1.9E-05 | 2.6E-03 | 5.0E-04 | -3.76  | -4.13   | -5.75   | -1.87   | 0.46 |
| 5281                              | 67411-56-6   | Residues (petroleum), vacuum                            | 223 | 87  | 9.9E-03 | 1.5E-03 | 3.0E-02 | 1.40 | 3.5E-06 | 1.3E-07 | 6.6E-09 | conf | conf | 1.7E-05 | 2.2E-03 | 4.3E-04 | -3.82  | -4.19   | -5.81   | -1.84   | 0.64 |
| 5282                              | 67422-81-0   | Kerosene (petroleum), hydrosulfurized                   | 223 | 87  | 9.9E-03 | 1.5E-03 | 3.0E-02 | 1.40 | 3.5E-06 | 1.3E-07 | 6.6E-09 | conf | conf | 1.6E-05 | 2.2E-03 | 4.1E-04 | -3.83  | -4.21   | -5.83   | -1.89   | 0.65 |
| 5283                              | 67422-80-9   | Distillates (petroleum), hydrosulfurized middle         | 223 | 87  | 9.9E-03 | 1.5E-03 | 3.0E-02 | 1.40 | 3.5E-06 | 1.3E-07 | 6.6E-09 | conf | conf | 1.6E-05 | 2.1E-03 | 4.2E-04 | -3.84  | -4.21   | -5.83   | -1.75   | 0.61 |
| 5284                              | 7050-78-8    | Distillates (petroleum), vacuum                         | 223 | 87  | 9.9E-03 | 1.5E-03 | 3.0E-02 | 1.40 | 3.5E-06 | 1.3E-07 | 6.6E-09 | conf | conf | 8.7E-04 | 1.2E-03 | 2.1E-04 | -4.11  | -4.48   | -6.10   | -1.84   | 0.68 |
| 5285                              | 91770-15-9   | Kerosene (petroleum), sweetened                         | 223 | 87  | 9.9E-03 | 1.5E-03 | 3.0E-02 | 1.40 | 3.5E-06 | 1.3E-07 | 6.6E-09 | conf | conf | 8.6E-04 | 1.1E-03 | 1.6E-04 | -4.11  | -4.49   | -6.11   | -1.99   | 0.65 |
| 5286                              | 67411-58-8   | Gas oils (petroleum), light vacuum                      | 223 | 87  | 9.9E-03 | 1.5E-03 | 3.0E-02 | 1.40 | 3.5E-06 | 1.3E-07 | 6.6E-09 | conf | conf | 8.0E-04 | 1.1E-03 | 1.9E-04 | -4.14  | -4.52   | -6.14   | -1.72   | 0.58 |
| 5287                              | 68955-35-1   | Naphtha (petroleum), catalytic reformed                 | 223 | 87  | 9.9E-03 | 1.5E-03 | 3.0E-02 | 1.40 | 3.5E-06 | 1.3E-07 | 6.6E-09 | conf | conf | 7.3E-04 | 9.7E-04 | 1.9E-04 | -4.18  | -4.55   | -6.18   | -1.87   | 0.46 |
| 5288                              | 68955-27-1   | Distillates (petroleum), petroleum residues vacuum      | 223 | 87  | 9.9E-03 | 1.5E-03 | 3.0E-02 | 1.40 | 3.5E-06 | 1.3E-07 | 6.6E-09 | conf | conf | 7.1E-04 | 9.5E-04 | 1.8E-04 | -4.19  | -4.56   | -6.19   | -1.84   | 0.98 |
| 5289                              | 67411-43-1   | Gas oils (petroleum), straight-run                      | 223 | 87  | 9.9E-03 | 1.5E-03 | 3.0E-02 | 1.40 | 3.5E-06 | 1.3E-07 | 6.6E-09 | conf | conf | 7.0E-04 | 9.4E-04 | 1.8E-04 | -4.20  | -4.57   | -6.20   | -1.74   | 0.60 |
| 5290                              | 8052-42-4    | Asphalt                                                 | 223 | 87  | 9.9E-03 | 1.5E-03 | 3.0E-02 | 1.40 | 3.5E-06 | 1.3E-07 | 6.6E-09 | conf | conf | 6.6E-04 | 8.7E-04 | 1.8E-04 | -4.23  | -4.59   | -6.22   | -1.84   | 0.64 |
| 5291                              | 67413-59-9   | Distillates (petroleum), light catalytic cracked        | 223 | 87  | 9.9E-03 | 1.5E-03 | 3.0E-02 | 1.40 | 3.5E-06 | 1.3E-07 | 6.6E-09 | conf | conf | 6.6E-04 | 8.7E-04 | 1.7E-04 | -4.23  | -4.60   | -6.22   | -3.82   | 0.62 |
| 5292                              | 67413-60-6   | Residues (petroleum), thermal cracked                   | 223 | 87  | 9.9E-03 | 1.5E-03 | 3.0E-02 | 1.40 | 3.5E-06 | 1.3E-07 | 6.6E-09 | conf | conf | 6.5E-04 | 8.7E-04 | 1.6E-04 | -4.23  | -4.60   | -6.22   | -3.82   | 0.62 |
| 5293                              | 68919-37-9   | Naphtha (petroleum), full-range reformed                | 223 | 87  | 9.9E-03 | 1.5E-03 | 3.0E-02 | 1.40 | 3.5E-06 | 1.3E-07 | 6.6E-09 | conf | conf | 5.9E-04 | 7.8E-04 | 1.7E-04 | -4.27  | -4.64   | -6.26   | -1.87   | 0.46 |
| 5294                              | 67411-55-5   | Naphtha (petroleum), light catalytic cracked            | 223 | 87  | 9.9E-03 | 1.5E-03 | 3.0E-02 | 1.40 | 3.5E-06 | 1.3E-07 | 6.6E-09 | conf | conf | 5.9E-04 | 7.8E-04 | 1.5E-04 | -4.27  | -4.64   | -6.27   | -1.87   | 0.46 |
| 5295                              | 67411-46-4   | Naphtha (petroleum), light straight-run                 | 223 | 87  | 9.9E-03 | 1.5E-03 | 3.0E-02 | 1.40 | 3.5E-06 | 1.3E-07 | 6.6E-09 | conf | conf | 5.8E-04 | 7.7E-04 | 1.5E-04 | -4.28  | -4.65   | -6.28   | -1.87   | 0.45 |
| 5296                              | 67422-70-9   | Naphtha (petroleum), hydrosulfurized light              | 223 | 87  | 9.9E-03 | 1.5E-03 | 3.0E-02 | 1.40 | 3.5E-06 | 1.3E-07 | 6.6E-09 | conf | conf | 5.5E-04 | 7.3E-04 | 1.3E-04 | -4.31  | -4.68   | -6.31   | -1.72   | 0.48 |
| 5297                              | 68476-34-6   | Fuel, diesel, no. 2                                     | 223 | 87  | 9.9E-03 | 1.5E-03 | 3.0E-02 | 1.40 | 3.5E-06 | 1.3E-07 | 6.6E-09 | conf | conf | 5.2E-04 | 6.8E-04 | 1.4E-04 | -4.32  | -4.69   | -6.32   | -1.87   | 0.46 |
| 5298                              | 67411-41-9   | Naphtha (petroleum), heavy straight-run                 | 223 | 87  | 9.9E-03 | 1.5E-03 | 3.0E-02 | 1.40 | 3.5E-06 | 1.3E-07 | 6.6E-09 | conf | conf | 4.9E-04 | 6.5E-04 | 1.4E-04 | -4.35  | -4.72   | -6.34   | -1.87   | 0.46 |
| 5299                              | 67413-57-9   | Residues (petroleum), hydrocracked                      | 223 | 87  | 9.9E-03 | 1.5E-03 | 3.0E-02 | 1.40 | 3.5E-06 | 1.3E-07 | 6.6E-09 | conf | conf | 4.7E-04 | 6.2E-04 | 1.1E-04 | -4.37  | -4.75   | -6.37   | -1.84   | 0.57 |
| 5300                              | 74869-22-0   | Lubricating oils                                        | 223 | 87  | 9.9E-03 | 1.5E-03 | 3.0E-02 | 1.40 | 3.5E-06 | 1.3E-07 | 6.6E-09 | conf | conf | 4.5E-04 | 6.0E-04 | 1.1E-04 | -4.41  | -4.79   | -6.41   | -1.89   | 0.52 |
| 5301                              | 67422-86-5   | Gas oils (petroleum), hydrosulfurized heavy vacuum      | 223 | 87  | 9.9E-03 | 1.5E-03 | 3.0E-02 | 1.40 | 3.5E-06 | 1.3E-07 | 6.6E-09 | conf | conf | 4.2E-04 | 5.6E-04 | 1.0E-04 | -4.42  | -4.80   | -6.42   | -1.84   | 0.98 |
| 5302                              | 67422-48-9   | Naphtha (petroleum), hydrosulfurized heavy              | 223 | 87  | 9.9E-03 | 1.5E-03 | 3.0E-02 | 1.40 | 3.5E-06 | 1.3E-07 | 6.6E-09 | conf | conf | 4.2E-04 | 5.5E-04 | 1.0E-04 | -4.43  | -4.80   | -6.43   | -1.87   | 0.48 |
| 5303                              | 67422-46-7   | Distillates (petroleum), hydrocracked middle            | 223 | 87  | 9.9E-03 | 1.5E-03 | 3.0E-02 | 1.40 | 3.5E-06 | 1.3E-07 | 6.6E-09 | conf | conf | 4.2E-04 | 5.5E-04 | 9.9E-05 | -4.43  | -4.79   | -6.43   | -1.75   | 0.43 |
| 5304                              | 67422-79-6   | Gas oils (petroleum), hydrocracked                      | 223 | 87  | 9.9E-03 | 1.5E-03 | 3.0E-02 | 1.40 | 3.5E-06 | 1.3E-07 | 6.6E-09 | conf | conf | 3.6E-04 | 4.8E-04 | 9.2E-05 | -4.49  | -4.86   | -6.48   | -1.75   | 0.61 |
| 5305                              | 67413-70-4   | Naphtha (petroleum), vacuum                             | 223 | 87  | 9.9E-03 | 1.5E-03 | 3.0E-02 | 1.40 | 3.5E-06 | 1.3E-07 | 6.6E-09 | conf | conf | 3.5E-04 | 4.6E-04 | 9.1E-05 | -4.50  | -4.87   | -6.49   | -1.84   | 0.98 |
| 5306                              | 92045-59-5   | Naphtha (petroleum), light catalytic cracked sweetened  | 223 | 87  | 9.9E-03 | 1.5E-03 | 3.0E-02 | 1.40 | 3.5E-06 | 1.3E-07 | 6.6E-09 | conf | conf | 3.1E-04 | 4.1E-04 | 7.5E-05 | -4.56  | -4.93   | -6.55   | -1.87   | 0.46 |
| 5307                              | 67413-54-4   | Naphtha (petroleum), heavy catalytic cracked            | 223 | 87  | 9.9E-03 | 1.5E-03 | 3.0E-02 | 1.40 | 3.5E-06 | 1.3E-07 | 6.6E-09 | conf | conf | 2.8E-04 | 3.7E-04 | 6.1E-05 | -4.59  | -4.96   | -6.58   | -1.87   | 0.46 |
| 5308                              | 67413-77-1   | Distillates (petroleum), light hydrocracked             | 223 | 87  | 9.9E-03 | 1.5E-03 | 3.0E-02 | 1.40 | 3.5E-06 | 1.3E-07 | 6.6E-09 | conf | conf | 2.8E-04 | 3.7E-04 | 7.1E-05 | -4.60  | -4.97   | -6.60   | -1.87   | 0.46 |
| 5309                              | 67413-68-0   | Naphtha (petroleum), heavy catalytic reformed           | 223 | 87  | 9.9E-03 | 1.5E-03 | 3.0E-02 | 1.40 | 3.5E-06 | 1.3E-07 | 6.6E-09 | conf | conf | 2.6E-04 | 3.4E-04 | 7.0E-05 | -4.64  | -5.04   | -6.63   | -1.87   | 0.46 |
| 5310                              | 92062-01-0   | Residues (petroleum), thermal cracked                   | 223 | 87  | 9.9E-03 | 1.5E-03 | 3.0E-02 | 1.40 | 3.5E-06 | 1.3E-07 | 6.6E-09 | conf | conf | 2.4E-04 | 3.2E-04 | 7.1E-05 | -4.65  | -5.04   | -6.66   | -1.84   | 0.98 |
| 5311                              | 67413-63-5   | Distillates (petroleum), light catalytic reformed       | 223 | 87  | 9.9E-03 | 1.5E-03 | 3.0E-02 | 1.40 | 3.5E-06 | 1.3E-07 | 6.6E-09 | conf | conf | 2.3E-04 | 3.4E-05 | 5.6E-05 | -4.64  | -5.01   | -6.64   | -1.87   | 0.46 |
| 5312                              | 68915-96-8   | Distillates (petroleum), heavy straight-run             | 223 | 87  | 9.9E-03 | 1.5E-03 | 3.0E-02 | 1.40 | 3.5E-06 | 1.3E-07 | 6.6E-09 | conf | conf | 2.2E-04 | 3.3E-04 | 6.1E-05 | -4.65  | -5.02   | -6.64   | -1.74   | 0.61 |
| 5313                              | 67413-46-2   | Distillates (petroleum), straight-run middle            | 223 | 87  | 9.9E-03 | 1.5E-03 | 3.0E-02 | 1.40 | 3.5E-06 | 1.3E-07 | 6.6E-09 | conf | conf | 2.4E-04 | 3.2E-04 | 6.7E-05 | -4.66  | -5.04   | -6.66   | -1.84   | 0.98 |
| 5314                              | 67412-82-8   | Distillates (petroleum), light thermal cracked          | 223 | 87  | 9.9E-03 | 1.5E-03 | 3.0E-02 | 1.40 | 3.5E-06 | 1.3E-07 | 6.6E-09 | conf | conf | 2.4E-04 | 3.2E-04 | 6.4E-05 | -4.66  | -5.03   | -6.66   | -3.82   | 0.62 |
| 5315                              | 67422-49-9   | Naphtha (petroleum), hydrocracked light                 | 223 | 87  | 9.9E-03 | 1.5E-03 | 3.0E-02 | 1.40 | 3.5E-06 | 1.3E-07 | 6.6E-09 | conf | conf | 2.4E-04 | 3.2E-04 | 5.4E-05 | -4.66  | -5.04   | -6.66   | -1.88   | 0.44 |
| 5316                              | 92062-01-0   | Residues (petroleum), thermal cracked                   | 223 | 87  | 9.9E-03 | 1.5E-03 | 3.0E-02 | 1.40 | 3.5E-06 | 1.3E-07 | 6.6E-09 | conf | conf | 2.2E-04 | 2.9E-04 | 5.4E-05 | -4.71  | -5.08   | -6.70   | -1.87   | 0.46 |
| 5317                              | 68793-12-0   | Naphtha (petroleum), unseparated                        | 223 | 87  | 9.9E-03 | 1.5E-03 | 3.0E-02 | 1.40 | 3.5E-06 | 1.3E-07 | 6.6E-09 | conf | conf | 2.2E-04 | 2.9E-   |         |        |         |         |         |      |

|      |            |                                                                                        |     |    |         |         |         |      |         |         |         |      |      |         |         |         |       |       |      |       |      |
|------|------------|----------------------------------------------------------------------------------------|-----|----|---------|---------|---------|------|---------|---------|---------|------|------|---------|---------|---------|-------|-------|------|-------|------|
| 5442 | 64742.05.8 | Extracts (petroleum), light paraffinic distillate solvent                              | 223 | 87 | 9.9E-03 | 1.5E-03 | 3.0E-02 | 1.40 | 3.5E-06 | 1.3E-07 | 6.6E-09 | conf | conf | 1.1E-03 | 1.4E-01 | 2.7E-02 | -6.01 | -6.39 | 8.01 | -0.67 | 0.64 |
| 5443 | 68311-75.9 | Hydrocarbons, C1-11, nonarom., reformed, light fraction                                | 223 | 87 | 9.9E-03 | 1.5E-03 | 3.0E-02 | 1.40 | 3.5E-06 | 1.3E-07 | 6.6E-09 | conf | conf | 1.1E-03 | 1.4E-01 | 2.7E-02 | -6.01 | -6.39 | 8.01 | -0.67 | 0.64 |
| 5444 | 93572.26.2 | Hydrocarbons, C5-11, nonarom., reformed, light fraction                                | 223 | 87 | 9.9E-03 | 1.5E-03 | 3.0E-02 | 1.40 | 3.5E-06 | 1.3E-07 | 6.6E-09 | conf | conf | 1.1E-03 | 1.4E-01 | 2.7E-02 | -6.01 | -6.39 | 8.01 | -0.67 | 0.64 |
| 5445 | 84050.05.9 | Distillates (petroleum), straight-run light                                            | 223 | 87 | 9.9E-03 | 1.5E-03 | 3.0E-02 | 1.40 | 3.5E-06 | 1.3E-07 | 6.6E-09 | conf | conf | 1.0E-03 | 1.4E-01 | 2.5E-02 | -6.03 | -6.41 | 8.03 | -0.87 | 0.46 |
| 5446 | 92045.64.2 | Hydrocarbons, C6-7, naphtha-cracking, solvent-refined                                  | 223 | 87 | 9.9E-03 | 1.5E-03 | 3.0E-02 | 1.40 | 3.5E-06 | 1.3E-07 | 6.6E-09 | conf | conf | 9.8E-03 | 1.4E-01 | 2.4E-02 | -6.04 | -6.42 | 8.02 | -0.87 | 0.46 |
| 5447 | 68921.03.7 | Distillates (petroleum), hydrocracked light catalytic cracked                          | 223 | 87 | 9.9E-03 | 1.5E-03 | 3.0E-02 | 1.40 | 3.5E-06 | 1.3E-07 | 6.6E-09 | conf | conf | 9.9E-02 | 1.3E-01 | 2.5E-02 | -6.05 | -6.42 | 8.04 | -0.32 | 0.62 |
| 5448 | 88476.29.9 | Feed assts, crude oil distillates                                                      | 223 | 87 | 9.9E-03 | 1.5E-03 | 3.0E-02 | 1.40 | 3.5E-06 | 1.3E-07 | 6.6E-09 | conf | conf | 9.9E-02 | 1.3E-01 | 2.5E-02 | -6.05 | -6.42 | 8.05 | -0.39 | 0.63 |
| 5449 | 92045.58.4 | Naphtha (petroleum), isomerization, C6-fraction                                        | 223 | 87 | 9.9E-03 | 1.5E-03 | 3.0E-02 | 1.40 | 3.5E-06 | 1.3E-07 | 6.6E-09 | conf | conf | 9.8E-03 | 1.3E-01 | 2.4E-02 | -6.05 | -6.42 | 8.05 | -0.47 | 0.62 |
| 5450 | 68512.62.9 | Residues (petroleum), light vacuum                                                     | 223 | 87 | 9.9E-03 | 1.5E-03 | 3.0E-02 | 1.40 | 3.5E-06 | 1.3E-07 | 6.6E-09 | conf | conf | 9.9E-02 | 1.3E-01 | 2.5E-02 | -6.05 | -6.43 | 8.05 | -0.80 | 0.99 |
| 5451 | 68513.03.1 | Naphtha (petroleum), light catalytic reformed, arom.-free                              | 223 | 87 | 9.9E-03 | 1.5E-03 | 3.0E-02 | 1.40 | 3.5E-06 | 1.3E-07 | 6.6E-09 | conf | conf | 9.9E-03 | 1.3E-01 | 2.5E-02 | -6.08 | -6.47 | 8.07 | -0.87 | 0.46 |
| 5452 | 90641.13.7 | Naphtha (petroleum), steam-cracked, hydrorefined, C9-10 arom.-rich                     | 223 | 87 | 9.9E-03 | 1.5E-03 | 3.0E-02 | 1.40 | 3.5E-06 | 1.3E-07 | 6.6E-09 | conf | conf | 9.8E-03 | 1.2E-01 | 2.3E-02 | -6.07 | -6.45 | 8.07 | -0.70 | 0.22 |
| 5453 | 64741.86.2 | Distillates (petroleum), sweetened middle                                              | 223 | 87 | 9.9E-03 | 1.5E-03 | 3.0E-02 | 1.40 | 3.5E-06 | 1.3E-07 | 6.6E-09 | conf | conf | 9.9E-02 | 1.2E-01 | 2.3E-02 | -6.08 | -6.46 | 8.08 | -0.75 | 0.61 |
| 5454 | 68477.38.3 | Distillates (petroleum), cracked steam-cracked petroleum distillates                   | 223 | 87 | 9.9E-03 | 1.5E-03 | 3.0E-02 | 1.40 | 3.5E-06 | 1.3E-07 | 6.6E-09 | conf | conf | 9.8E-03 | 1.2E-01 | 2.3E-02 | -6.09 | -6.46 | 8.09 | -0.36 | 0.34 |
| 5455 | 98072.36.7 | Aromatic hydrocarbons, distn. residues, naphthalene-rich                               | 223 | 87 | 9.9E-03 | 1.5E-03 | 3.0E-02 | 1.40 | 3.5E-06 | 1.3E-07 | 6.6E-09 | conf | conf | 9.1E-02 | 1.2E-01 | 2.0E-02 | -6.09 | -6.47 | 8.09 | -0.36 | 0.34 |
| 5456 | 68476.75.6 | Distillates (petroleum), catalytic reformed depentanizer                               | 223 | 87 | 9.9E-03 | 1.5E-03 | 3.0E-02 | 1.40 | 3.5E-06 | 1.3E-07 | 6.6E-09 | conf | conf | 8.8E-02 | 1.1E-01 | 2.3E-02 | -6.12 | -6.48 | 8.11 | -0.87 | 0.46 |
| 5457 | 64741.68.3 | Naphtha (petroleum), light alkyne                                                      | 223 | 87 | 9.9E-03 | 1.5E-03 | 3.0E-02 | 1.40 | 3.5E-06 | 1.3E-07 | 6.6E-09 | conf | conf | 8.2E-02 | 1.1E-01 | 2.1E-02 | -6.10 | -6.50 | 8.12 | -0.87 | 0.46 |
| 5458 | 68477.39.4 | Distillates (petroleum), cracked steam-cracked petroleum distillates, C9-10 fraction   | 223 | 87 | 9.9E-03 | 1.5E-03 | 3.0E-02 | 1.40 | 3.5E-06 | 1.3E-07 | 6.6E-09 | conf | conf | 8.1E-02 | 1.1E-01 | 2.1E-02 | -6.13 | -6.50 | 8.13 | -0.40 | 0.57 |
| 5459 | 64742.05.0 | Residual oils (petroleum), hydrocracked                                                | 223 | 87 | 9.9E-03 | 1.5E-03 | 3.0E-02 | 1.40 | 3.5E-06 | 1.3E-07 | 6.6E-09 | conf | conf | 8.3E-02 | 1.1E-01 | 2.0E-02 | -6.13 | -6.50 | 8.13 | 0.29  | 1.09 |
| 5460 | 93821.66.0 | Residual oils (petroleum), hydrocracked                                                | 223 | 87 | 9.9E-03 | 1.5E-03 | 3.0E-02 | 1.40 | 3.5E-06 | 1.3E-07 | 6.6E-09 | conf | conf | 8.2E-02 | 1.1E-01 | 2.0E-02 | -6.13 | -6.51 | 8.13 | -0.84 | 0.98 |
| 5461 | 68475.80.9 | Distillates (petroleum), light steam-cracked naphtha                                   | 223 | 87 | 9.9E-03 | 1.5E-03 | 3.0E-02 | 1.40 | 3.5E-06 | 1.3E-07 | 6.6E-09 | conf | conf | 8.3E-02 | 1.1E-01 | 2.0E-02 | -6.14 | -6.51 | 8.14 | -0.35 | 0.54 |
| 5462 | 68477.33.8 | gases (petroleum), C4-4, isobutane-rich                                                | 223 | 87 | 9.9E-03 | 1.5E-03 | 3.0E-02 | 1.40 | 3.5E-06 | 1.3E-07 | 6.6E-09 | conf | conf | 7.9E-02 | 1.1E-01 | 2.0E-02 | -6.15 | -6.52 | 8.14 | -0.59 | 0.39 |
| 5463 | 64742.67.2 | Foos oil (petroleum)                                                                   | 223 | 87 | 9.9E-03 | 1.5E-03 | 3.0E-02 | 1.40 | 3.5E-06 | 1.3E-07 | 6.6E-09 | conf | conf | 7.2E-02 | 9.6E-02 | 1.8E-02 | -6.19 | -6.56 | 8.18 | -0.84 | 0.98 |
| 5464 | 92045.61.3 | Naphtha (petroleum), hydrocracked light steam-cracked                                  | 223 | 87 | 9.9E-03 | 1.5E-03 | 3.0E-02 | 1.40 | 3.5E-06 | 1.3E-07 | 6.6E-09 | conf | conf | 7.0E-02 | 9.3E-02 | 1.6E-02 | -6.20 | -6.58 | 8.20 | -0.70 | 0.22 |
| 5465 | 92045.61.3 | Hydrocarbons, C1-11, naphtha-cracking, arom.-free                                      | 223 | 87 | 9.9E-03 | 1.5E-03 | 3.0E-02 | 1.40 | 3.5E-06 | 1.3E-07 | 6.6E-09 | conf | conf | 7.0E-02 | 9.3E-02 | 1.6E-02 | -6.20 | -6.58 | 8.20 | -0.70 | 0.22 |
| 5466 | 64741.52.2 | Distillates (petroleum), light naphthenic                                              | 223 | 87 | 9.9E-03 | 1.5E-03 | 3.0E-02 | 1.40 | 3.5E-06 | 1.3E-07 | 6.6E-09 | conf | conf | 6.8E-02 | 9.1E-02 | 1.6E-02 | -6.21 | -6.59 | 8.21 | -0.17 | 0.64 |
| 5467 | 64742.70.7 | Paraffin oils (petroleum), catalytic dewaxed heavy                                     | 223 | 87 | 9.9E-03 | 1.5E-03 | 3.0E-02 | 1.40 | 3.5E-06 | 1.3E-07 | 6.6E-09 | conf | conf | 6.6E-02 | 8.4E-02 | 1.7E-02 | -6.24 | -6.61 | 8.24 | 0.19  | 1.09 |
| 5468 | 64741.53.3 | Distillates (petroleum), heavy naphthenic                                              | 223 | 87 | 9.9E-03 | 1.5E-03 | 3.0E-02 | 1.40 | 3.5E-06 | 1.3E-07 | 6.6E-09 | conf | conf | 6.0E-02 | 8.0E-02 | 1.6E-02 | -6.26 | -6.63 | 8.26 | -0.17 | 0.64 |
| 5469 | 8009.03.8  | Petroleum                                                                              | 223 | 87 | 9.9E-03 | 1.5E-03 | 3.0E-02 | 1.40 | 3.5E-06 | 1.3E-07 | 6.6E-09 | conf | conf | 5.9E-02 | 7.7E-02 | 1.6E-02 | -6.28 | -6.64 | 8.27 | 0.17  | 1.10 |
| 5470 | 92052.09.4 | Slack waxes (petroleum), hydrogenated                                                  | 223 | 87 | 9.9E-03 | 1.5E-03 | 3.0E-02 | 1.40 | 3.5E-06 | 1.3E-07 | 6.6E-09 | conf | conf | 5.9E-02 | 7.7E-02 | 1.5E-02 | -6.28 | -6.65 | 8.27 | 0.42  | 1.02 |
| 5471 | 90223.53.0 | Alkanes, C12-26 branched and linear                                                    | 223 | 87 | 9.9E-03 | 1.5E-03 | 3.0E-02 | 1.40 | 3.5E-06 | 1.3E-07 | 6.6E-09 | conf | conf | 5.7E-02 | 7.5E-02 | 1.4E-02 | -6.29 | -6.67 | 8.29 | -0.75 | 0.61 |
| 5472 | 68783.10.4 | Extracts (petroleum), solvent-refined heavy paraffinic distillate solvent              | 223 | 87 | 9.9E-03 | 1.5E-03 | 3.0E-02 | 1.40 | 3.5E-06 | 1.3E-07 | 6.6E-09 | conf | conf | 5.3E-02 | 7.2E-02 | 1.4E-02 | -6.30 | -6.67 | 8.30 | -0.36 | 0.34 |
| 5473 | 68956.55.8 | Hydrocarbons, C5-unsatd.                                                               | 223 | 87 | 9.9E-03 | 1.5E-03 | 3.0E-02 | 1.40 | 3.5E-06 | 1.3E-07 | 6.6E-09 | conf | conf | 5.2E-02 | 6.9E-02 | 1.3E-02 | -6.33 | -6.70 | 8.32 | -0.94 | 0.40 |
| 5474 | 92045.61.9 | Hydrocarbons, C12-26, naphtha-cracking, hydrorefined                                   | 223 | 87 | 9.9E-03 | 1.5E-03 | 3.0E-02 | 1.40 | 3.5E-06 | 1.3E-07 | 6.6E-09 | conf | conf | 5.1E-02 | 6.7E-02 | 1.4E-02 | -6.34 | -6.71 | 8.33 | -0.70 | 0.22 |
| 5475 | 68783.65.3 | Gases (petroleum), C1-4, sweetened                                                     | 223 | 87 | 9.9E-03 | 1.5E-03 | 3.0E-02 | 1.40 | 3.5E-06 | 1.3E-07 | 6.6E-09 | conf | conf | 5.1E-02 | 6.7E-02 | 1.4E-02 | -6.34 | -6.71 | 8.33 | -0.94 | 0.40 |
| 5476 | 88290.88.7 | Naphtha (petroleum), steam-cracking tar middle                                         | 223 | 87 | 9.9E-03 | 1.5E-03 | 3.0E-02 | 1.40 | 3.5E-06 | 1.3E-07 | 6.6E-09 | conf | conf | 4.7E-02 | 6.2E-02 | 1.1E-02 | -6.37 | -6.75 | 8.37 | -0.36 | 0.34 |
| 5477 | 68923.08.7 | Naphtha (petroleum), arom.                                                             | 223 | 87 | 9.9E-03 | 1.5E-03 | 3.0E-02 | 1.40 | 3.5E-06 | 1.3E-07 | 6.6E-09 | conf | conf | 4.8E-02 | 5.7E-02 | 1.1E-02 | -6.41 | -6.78 | 8.41 | -0.87 | 0.46 |
| 5478 | 68313.60.7 | Paraffin waxes and hydrocarbon waxes, microcryst.                                      | 223 | 87 | 9.9E-03 | 1.5E-03 | 3.0E-02 | 1.40 | 3.5E-06 | 1.3E-07 | 6.6E-09 | conf | conf | 4.8E-02 | 5.7E-02 | 1.1E-02 | -6.41 | -6.78 | 8.41 | -0.87 | 0.46 |
| 5479 | 68783.11.9 | Naphtha (petroleum), light polym.                                                      | 223 | 87 | 9.9E-03 | 1.5E-03 | 3.0E-02 | 1.40 | 3.5E-06 | 1.3E-07 | 6.6E-09 | conf | conf | 3.6E-02 | 4.7E-02 | 9E-03   | -6.49 | -6.86 | 8.49 | -0.87 | 0.46 |
| 5480 | 68237.18.4 | Gas oils (petroleum), 2-6E-02                                                          | 223 | 87 | 9.9E-03 | 1.5E-03 | 3.0E-02 | 1.40 | 3.5E-06 | 1.3E-07 | 6.6E-09 | conf | conf | 3.6E-02 | 4.7E-02 | 8.8E-03 | -6.49 | -6.86 | 8.49 | -0.87 | 0.46 |
| 5481 | 64742.66.1 | Naphtha (petroleum), catalytic dewaxed                                                 | 223 | 87 | 9.9E-03 | 1.5E-03 | 3.0E-02 | 1.40 | 3.5E-06 | 1.3E-07 | 6.6E-09 | conf | conf | 3.5E-02 | 4.6E-02 | 8.2E-03 | -6.50 | -6.88 | 8.50 | -0.87 | 0.46 |
| 5482 | 97593.01.6 | Alkanes, C9-10 branched, C9-rich                                                       | 223 | 87 | 9.9E-03 | 1.5E-03 | 3.0E-02 | 1.40 | 3.5E-06 | 1.3E-07 | 6.6E-09 | conf | conf | 3.4E-02 | 4.4E-02 | 9.5E-03 | -6.52 | -6.91 | 8.51 | -0.30 | 0.81 |
| 5483 | 92045.61.5 | Lubricating oils, used, vacuum distd.                                                  | 223 | 87 | 9.9E-03 | 1.5E-03 | 3.0E-02 | 1.40 | 3.5E-06 | 1.3E-07 | 6.6E-09 | conf | conf | 3.3E-02 | 4.3E-02 | 8.0E-03 | -6.56 | -6.95 | 8.55 | -0.30 | 0.81 |
| 5484 | 93821.12.6 | Alkanes, C10-14 branched and linear, C12-rich                                          | 223 | 87 | 9.9E-03 | 1.5E-03 | 3.0E-02 | 1.40 | 3.5E-06 | 1.3E-07 | 6.6E-09 | conf | conf | 3.3E-02 | 4.3E-02 | 8.0E-03 | -6.57 | -6.95 | 8.57 | -0.30 | 0.82 |
| 5485 | 68476.49.3 | Hydrocarbons, C2-4, C3-rich                                                            | 223 | 87 | 9.9E-03 | 1.5E-03 | 3.0E-02 | 1.40 | 3.5E-06 | 1.3E-07 | 6.6E-09 | conf | conf | 2.9E-02 | 3.8E-02 | 6.8E-03 | -6.59 | -6.97 | 8.59 | -0.39 | 0.39 |
| 5486 | 9473.07.0  | Distillates (petroleum), cracked, ethylene manuf. by-product, C9-10 fraction           | 223 | 87 | 9.9E-03 | 1.5E-03 | 3.0E-02 | 1.40 | 3.5E-06 | 1.3E-07 | 6.6E-09 | conf | conf | 2.9E-02 | 3.8E-02 | 6.8E-03 | -6.60 | -6.97 | 8.60 | -0.39 | 0.39 |
| 5487 | 64742.64.4 | Paraffin waxes (petroleum), clay-treated                                               | 223 | 87 | 9.9E-03 | 1.5E-03 | 3.0E-02 | 1.40 | 3.5E-06 | 1.3E-07 | 6.6E-09 | conf | conf | 2.8E-02 | 3.7E-02 | 7.1E-03 | -6.60 | -6.97 | 8.60 | -0.42 | 1.02 |
| 5488 | 68410.11.9 | Naphtha (petroleum), catalytic reformed ethylene glycol-water counter-current esters   | 223 | 87 | 9.9E-03 | 1.5E-03 | 3.0E-02 | 1.40 | 3.5E-06 | 1.3E-07 | 6.6E-09 | conf | conf | 2.6E-02 | 3.5E-02 | 6.3E-03 | -6.63 | -7.00 | 8.63 | -0.87 | 0.46 |
| 5489 | 95465.90.0 | Hydrocarbons, C4, n-butene conc.                                                       | 223 | 87 | 9.9E-03 | 1.5E-03 | 3.0E-02 | 1.40 | 3.5E-06 | 1.3E-07 | 6.6E-09 | conf | conf | 2.5E-02 | 3.4E-02 | 6.1E-03 | -6.64 | -7.02 | 8.64 | -0.85 | 0.21 |
| 5490 | 10210.14.5 | Hydrocarbons, C4, C5-rich, steam-cracked naphtha                                       | 223 | 87 | 9.9E-03 | 1.5E-03 | 3.0E-02 | 1.40 | 3.5E-06 | 1.3E-07 | 6.6E-09 | conf | conf | 2.4E-02 | 3.3E-02 | 6.2E-03 | -6.65 | -7.02 | 8.65 | -0.94 | 0.40 |
| 5491 | 68477.71.4 | Gases (petroleum), catalytic-cracked gas oil deparaffinizer bottoms, C4-rich acid-free | 223 | 87 | 9.9E-03 | 1.5E-03 | 3.0E-02 | 1.40 | 3.5E-06 | 1.3E-07 | 6.6E-09 | conf | conf | 2.4E-02 | 3.3E-02 | 5.6E-03 | -6.66 | -7.04 | 8.66 | -0.59 | 0.39 |
| 5492 | 92045.77.7 | Petroleum (petroleum), hydrogenated                                                    | 223 | 87 | 9.9E-03 | 1.5E-03 | 3.0E-02 | 1.40 | 3.5E-06 | 1.3E-07 | 6.6E-09 | conf | conf | 2.4E-02 | 3.2E-02 | 6.0E-03 | -6.67 | -7.04 | 8.67 | 0.17  | 1.10 |
| 5493 | 64741.67.9 | Residues (petroleum), C15-20, solvent-refined fractionator                             | 223 | 87 | 9.9E-03 | 1.5E-03 | 3.0E-02 | 1.40 | 3.5E-06 | 1.3E-07 | 6.6E-09 | conf | conf | 2.3E-02 | 3.1E-02 | 5.4E-03 | -6.67 | -7.04 | 8.67 | -0.36 | 0.3  |



|      |             |                                        |     |     |         |          |          |      |         |         |         |          |         |          |          |          |        |        |        |       |       |      |      |      |
|------|-------------|----------------------------------------|-----|-----|---------|----------|----------|------|---------|---------|---------|----------|---------|----------|----------|----------|--------|--------|--------|-------|-------|------|------|------|
| 5645 | 55-981      | Acampromate Calcium                    | 246 | 130 | 1.2E-05 | 1.55E-04 | 1.21E-01 | 1.40 | 3.5E-06 | 1.1E-10 | 1.1E-06 | 1.25E-01 | 1.4E-01 | 2.4E-01  | 3.3E-02  | 1.68E-10 | -9.63  | 9.95   | -12.47 | 0.90  | 1.12  | 0.0% | 0.0% | 0.0% |
| 5794 | 72559-69    | Acetaminophen Hydrochloride (Citaprom) | 847 | 101 | 1.2E-01 | 1.55E-04 | 2.25E-03 | 7.21 | 3.5E-06 | 1.1E-10 | 1.1E-06 | 1.25E-01 | 1.4E-01 | 2.4E-01  | 3.3E-02  | 1.68E-10 | -9.63  | 9.95   | -12.47 | 0.90  | 1.12  | 0.0% | 0.0% | 0.0% |
| 5796 | 106266-02   | Risperdone                             | 411 | 236 | 6.2E-09 | 8.4E-01  | 3.51E-03 | 8.0  | 3.5E-06 | 1.2E-05 | 3.5E-07 | 1.2E-01  | 6.8E-02 | 9.3E-04  | 1.5E-05  | 7.5E-05  | -11.44 | -11.31 | -12.21 | -0.64 | 0.0%  | 0.0% | 0.0% |      |
| 5699 | 15676-161   | Sulindone                              | 847 | 227 | 1.6E-08 | 2.0E-03  | 4.51E-05 | 9.2  | 3.5E-06 | 1.1E-06 | 3.5E-07 | 1.2E-01  | 6.8E-02 | 9.3E-04  | 1.5E-05  | 7.5E-05  | -11.44 | -11.31 | -12.21 | -0.64 | 0.0%  | 0.0% | 0.0% |      |
| 5798 | 29064-01-9  | Glycidol                               | 361 | 241 | 1.6E-14 | 2.2E-03  | 1.21E-03 | 4.5  | 3.5E-06 | 1.1E-06 | 3.5E-07 | 1.2E-01  | 6.8E-02 | 9.3E-04  | 1.5E-05  | 7.5E-05  | -11.44 | -11.31 | -12.21 | -0.64 | 0.0%  | 0.0% | 0.0% |      |
| 5800 | 130602-021  | Repagidone                             | 483 | 274 | 2.4E-12 | 5.9E-02  | 1.55E-06 | 3.6  | 3.5E-06 | 1.1E-06 | 3.5E-07 | 1.2E-01  | 6.8E-02 | 9.3E-04  | 1.5E-05  | 7.5E-05  | -11.44 | -11.31 | -12.21 | -0.64 | 0.0%  | 0.0% | 0.0% |      |
| 5823 | 139024-18   | Zolmitriptan                           | 287 | 202 | 1.9E-07 | 1.55E-04 | 8.81E-03 | 8.7  | 3.5E-06 | 3.5E-07 | 1.1E-07 | 4.3E-02  | 2.5E-02 | 4.0E-04  | 5.6E-05  | 2.8E-03  | -10.21 | -12.24 | -12.47 | -3.47 | -3.09 | 0.6% | 0.0% |      |
| 5892 | 54695-21-8  | Abemethide                             | 365 | 192 | 2.0E-07 | 6.5E-04  | 1.44E-03 | 4.0  | 3.5E-06 | 1.1E-06 | 3.5E-07 | 1.2E-01  | 6.8E-02 | 9.3E-04  | 1.5E-05  | 7.5E-05  | -11.44 | -11.31 | -12.21 | -0.64 | 0.0%  | 0.0% | 0.0% |      |
| 5938 | 5633-20-5   | Oxybutynin                             | 158 | 186 | 2.3E-08 | 1.4E-01  | 9.11E-03 | 8.3  | 3.5E-06 | 1.1E-06 | 3.5E-07 | 1.2E-01  | 6.8E-02 | 9.3E-04  | 1.5E-05  | 7.5E-05  | -11.44 | -11.31 | -12.21 | -0.64 | 0.0%  | 0.0% | 0.0% |      |
| 5632 | 100968-85-4 | Levofloxacin                           | 161 | 168 | 1.3E-05 | 1.55E-04 | 6.21E-01 | 6.1  | 3.5E-06 | 1.1E-06 | 3.5E-07 | 1.2E-01  | 6.8E-02 | 9.3E-04  | 1.5E-05  | 7.5E-05  | -11.44 | -11.31 | -12.21 | -0.64 | 0.0%  | 0.0% | 0.0% |      |
| 5642 | 638-23-3    | Carbocisteine                          | 179 | 259 | 2.0E-05 | 3.8E-04  | 5.80E-05 | 1.9  | 3.5E-06 | 3.5E-06 | 1.1E-06 | 2.7E-02  | 1.5E-02 | 3.31E-03 | 1.55E-01 | -8.83    | 9.57   | -12.48 | -3.03  | 1.13  | 0.0%  | 0.0% | 0.0% |      |
| 5641 | 64-6-8      | Colchicine                             | 399 | 242 | 4.2E-09 | 1.44E-01 | 7.21E-01 | 1.3  | 3.5E-06 | 2.1E-07 | 3.5E-07 | 3.2E-02  | 1.9E-02 | 2.8E-04  | 4.2E-05  | 2.13E-02 | -21.21 | -12.20 | -14.16 | -2.93 | 1.16  | 0.0% | 0.0% |      |
| 5979 | 51333-22-3  | Fluorazone                             | 431 | 234 | 1.5E-12 | 2.31E-03 | 1.11E-03 | 1.3  | 3.5E-06 | 4.0E-06 | 3.5E-07 | 1.2E-01  | 6.8E-02 | 9.3E-04  | 1.5E-05  | 7.5E-05  | -11.44 | -11.31 | -12.21 | -0.64 | 0.0%  | 0.0% | 0.0% |      |
| 5811 | 1977-10-2   | Lormetazepam                           | 335 | 208 | 6.4E-10 | 1.0E-01  | 1.71E-02 | 1.0  | 3.5E-06 | 1.1E-06 | 3.5E-07 | 1.2E-01  | 6.8E-02 | 9.3E-04  | 1.5E-05  | 7.5E-05  | -11.44 | -11.31 | -12.21 | -0.64 | 0.0%  | 0.0% | 0.0% |      |
| 5818 | 59-67-6     | Nicotinic Acid                         | 123 | 68  | 1.2E-02 | 4.13E-04 | 9.91E-02 | 2.0  | 3.5E-06 | 6.8E-07 | 3.5E-07 | 1.5E-01  | 8.7E-01 | 9.7E-01  | 2.0E-02  | 7.2E-01  | -9.44  | -10.00 | -12.29 | -4.71 | 0.61  | 0.0% | 0.0% |      |
| 5911 | 52-84-6     | Haloperidol                            | 176 | 194 | 1.2E-06 | 5.84E-04 | 3.81E-03 | 4.2  | 3.5E-06 | 1.1E-06 | 3.5E-07 | 1.2E-01  | 6.8E-02 | 9.3E-04  | 1.5E-05  | 7.5E-05  | -11.44 | -11.31 | -12.21 | -0.64 | 0.0%  | 0.0% | 0.0% |      |
| 5803 | 58621-41-2  | Morfexonacin                           | 401 | 325 | 9.7E-13 | 1.3E-06  | 8.9E-06  | 6.1  | 3.5E-06 | 1.1E-06 | 3.5E-07 | 1.2E-01  | 6.8E-02 | 9.3E-04  | 1.5E-05  | 7.5E-05  | -11.44 | -11.31 | -12.21 | -0.64 | 0.0%  | 0.0% | 0.0% |      |
| 5917 | 33005-86-7  | Thiostatinic Acid                      | 360 | 163 | 1.2E-06 | 1.3E-06  | 6.6E-02  | 1.6  | 3.5E-06 | 1.1E-06 | 3.5E-07 | 1.2E-01  | 6.8E-02 | 9.3E-04  | 1.5E-05  | 7.5E-05  | -11.44 | -11.31 | -12.21 | -0.64 | 0.0%  | 0.0% | 0.0% |      |
| 5673 | 58-25-3     | Chloridazepoxide                       | 300 | 234 | 1.3E-09 | 1.55E-05 | 2.66E-02 | 5.0  | 3.5E-06 | 3.4E-08 | 1.1E-06 | 5.2E-01  | 3.0E-01 | 7.5E-03  | 7.0E-04  | 1.7E-02  | -20.26 | -10.49 | -11.85 | -1.17 | 0.97  | 0.0% | 0.0% |      |
| 5636 | 54-21-2     | Isoetoprolol                           | 300 | 148 | 1.4E-05 | 2.8E-01  | 7.11E-07 | 4.4  | 3.5E-06 | 3.6E-08 | 1.1E-06 | 8.5E-02  | 4.9E-02 | 1.0E-03  | 1.1E-04  | 3.8E-06  | -11.71 | -11.65 | -13.04 | -2.31 | 1.21  | 0.0% | 0.0% |      |
| 5687 | 94667-70-8  | Mizalolan                              | 326 | 201 | 6.8E-07 | 6.79E-01 | 2.11E-04 | 4.4  | 3.5E-06 | 3.4E-08 | 1.1E-06 | 1.7E-02  | 1.0E-02 | 1.4E-04  | 2.2E-05  | 1.1E-03  | -12.12 | -12.02 | -13.19 | -3.67 | 0.59  | 0.0% | 0.0% |      |
| 5658 | 62571-86-2  | Captopril                              | 216 | 134 | 9.7E-04 | 1.44E-01 | 6.9E-06  | 3.3  | 3.5E-06 | 1.2E-07 | 1.1E-06 | 2.0E-02  | 1.1E-02 | 2.9E-02  | 2.7E-03  | 6.8E-02  | -10.30 | -12.04 | -12.94 | -0.94 | 1.04  | 0.0% | 0.0% |      |
| 5980 | 51323-22-3  | Bucindolol                             | 428 | 234 | 1.2E-04 | 4.1E-02  | 1.1E-02  | 13.3 | 3.5E-06 | 4.0E-08 | 1.1E-06 | 2.1E-01  | 1.2E-01 | 3.4E-03  | 2.9E-04  | 7.7E-03  | -11.13 | -11.10 | -12.51 | -1.73 | 0.23  | 0.0% | 0.0% |      |
| 5722 | 53-19-2     | PRAVASTATIN                            | 425 | 243 | 1.1E-14 | 5.13E-03 | 1.3E-03  | 4.3  | 3.5E-06 | 1.1E-06 | 3.5E-07 | 1.2E-01  | 6.8E-02 | 9.3E-04  | 1.5E-05  | 7.5E-05  | -11.44 | -11.31 | -12.21 | -0.64 | 0.0%  | 0.0% | 0.0% |      |
| 5749 | 93-141      | Xenofenoxide Hydrochloride             | 198 | 100 | 3.4E-04 | 1.2E-05  | 2.6E-06  | 14.0 | 3.5E-06 | 1.1E-06 | 3.5E-07 | 4.3E-01  | 2.5E-01 | 6.1E-01  | 5.8E-02  | 1.8E-05  | -9.27  | -9.77  | -12.21 | -0.35 | 0.76  | 0.0% | 0.0% |      |
| 5786 | 123-99-9    | Asiatic Acid                           | 188 | 127 | 1.1E-03 | 3.8E-03  | 5.0E-01  | 4.6  | 3.5E-06 | 1.1E-06 | 3.5E-07 | 1.2E-01  | 6.8E-02 | 9.3E-04  | 1.5E-05  | 7.5E-05  | -11.44 | -11.31 | -12.21 | -0.64 | 0.0%  | 0.0% | 0.0% |      |
| 5636 | 54-21-2     | Isoetoprolol                           | 300 | 148 | 1.4E-05 | 2.8E-01  | 7.11E-07 | 4.4  | 3.5E-06 | 3.6E-08 | 1.1E-06 | 8.5E-02  | 4.9E-02 | 1.0E-03  | 1.1E-04  | 3.8E-06  | -11.71 | -11.65 | -13.04 | -2.31 | 1.21  | 0.0% | 0.0% |      |
| 5687 | 94667-70-8  | Mizalolan                              | 326 | 201 | 6.8E-07 | 6.79E-01 | 2.11E-04 | 4.4  | 3.5E-06 | 3.4E-08 | 1.1E-06 | 1.7E-02  | 1.0E-02 | 1.4E-04  | 2.2E-05  | 1.1E-03  | -12.12 | -12.02 | -13.19 | -3.67 | 0.59  | 0.0% | 0.0% |      |
| 5658 | 62571-86-2  | Captopril                              | 216 | 134 | 9.7E-04 | 1.44E-01 | 6.9E-06  | 3.3  | 3.5E-06 | 1.2E-07 | 1.1E-06 | 2.0E-02  | 1.1E-02 | 2.9E-02  | 2.7E-03  | 6.8E-02  | -10.30 | -12.04 | -12.94 | -0.94 | 1.04  | 0.0% | 0.0% |      |
| 5980 | 51323-22-3  | Bucindolol                             | 428 | 234 | 1.2E-04 | 4.1E-02  | 1.1E-02  | 13.3 | 3.5E-06 | 4.0E-08 | 1.1E-06 | 2.1E-01  | 1.2E-01 | 3.4E-03  | 2.9E-04  | 7.7E-03  | -11.13 | -11.10 | -12.51 | -1.73 | 0.23  | 0.0% | 0.0% |      |
| 5722 | 53-19-2     | PRAVASTATIN                            | 425 | 243 | 1.1E-14 | 5.13E-03 | 1.3E-03  | 4.3  | 3.5E-06 | 1.1E-06 | 3.5E-07 | 1.2E-01  | 6.8E-02 | 9.3E-04  | 1.5E-05  | 7.5E-05  | -11.44 | -11.31 | -12.21 | -0.64 | 0.0%  | 0.0% | 0.0% |      |
| 5749 | 93-141      | Xenofenoxide Hydrochloride             | 198 | 100 | 3.4E-04 | 1.2E-05  | 2.6E-06  | 14.0 | 3.5E-06 | 1.1E-06 | 3.5E-07 | 4.3E-01  | 2.5E-01 | 6.1E-01  | 5.8E-02  | 1.8E-05  | -9.27  | -9.77  | -12.21 | -0.35 | 0.76  | 0.0% | 0.0% |      |
| 5786 | 123-99-9    | Asiatic Acid                           | 188 | 127 | 1.1E-03 | 3.8E-03  | 5.0E-01  | 4.6  | 3.5E-06 | 1.1E-06 | 3.5E-07 | 1.2E-01  | 6.8E-02 | 9.3E-04  | 1.5E-05  | 7.5E-05  | -11.44 | -11.31 | -12.21 | -0.64 | 0.0%  | 0.0% | 0.0% |      |
| 5636 | 54-21-2     | Isoetoprolol                           | 300 | 148 | 1.4E-05 | 2.8E-01  | 7.11E-07 | 4.4  | 3.5E-06 | 3.6E-08 | 1.1E-06 | 8.5E-02  | 4.9E-02 | 1.0E-03  | 1.1E-04  | 3.8E-06  | -11.71 | -11.65 | -13.04 | -2.31 | 1.21  | 0.0% | 0.0% |      |
| 5687 | 94667-70-8  | Mizalolan                              | 326 | 201 | 6.8E-07 | 6.79E-01 | 2.11E-04 | 4.4  | 3.5E-06 | 3.4E-08 | 1.1E-06 | 1.7E-02  | 1.0E-02 | 1.4E-04  | 2.2E-05  | 1.1E-03  | -12.12 | -12.02 | -13.19 | -3.67 | 0.59  | 0.0% | 0.0% |      |
| 5658 | 62571-86-2  | Captopril                              | 216 | 134 | 9.7E-04 | 1.44E-01 | 6.9E-06  | 3.3  | 3.5E-06 | 1.2E-07 | 1.1E-06 | 2.0E-02  | 1.1E-02 | 2.9E-02  | 2.7E-03  | 6.8E-02  | -10.30 | -12.04 | -12.94 | -0.94 | 1.04  | 0.0% | 0.0% |      |
| 5980 | 51323-22-3  | Bucindolol                             | 428 | 234 | 1.2E-04 | 4.1E-02  | 1.1E-02  | 13.3 | 3.5E-06 | 4.0E-08 | 1.1E-06 | 2.1E-01  | 1.2E-01 | 3.4E-03  | 2.9E-04  | 7.7E-03  | -11.13 | -11.10 | -12.51 | -1.73 | 0.23  | 0.0% | 0.0% |      |
| 5722 | 53-19-2     | PRAVASTATIN                            | 425 | 243 | 1.1E-14 | 5.13E-03 | 1.3E-03  | 4.3  | 3.5E-06 | 1.1E-06 | 3.5E-07 | 1.2E-01  | 6.8E-02 | 9.3E-04  | 1.5E-05  | 7.5E-05  | -11.44 | -11.31 | -12.21 | -0.64 | 0.0%  | 0.0% | 0.0% |      |
| 5749 | 93-141      | Xenofenoxide Hydrochloride             | 198 | 100 | 3.4E-04 | 1.2E-05  | 2.6E-06  | 14.0 | 3.5E-06 | 1.1E-06 | 3.5E-07 | 4.3E-01  | 2.5E-01 | 6.1E-01  | 5.8E-02  | 1.8E-05  | -9.27  | -9.77  | -12.21 | -0.35 | 0.76  | 0.0% | 0.0% |      |
| 5786 | 123-99-9    | Asiatic Acid                           | 188 | 127 | 1.1E-03 | 3.8E-03  | 5.0E-01  | 4.6  | 3.5E-06 | 1.1E-06 | 3.5E-07 | 1.2E-01  | 6.8E-02 | 9.3E-04  | 1.5E-05  | 7.5E-05  | -11.44 | -11.31 | -12.21 | -0.64 | 0.0%  | 0.0% | 0.0% |      |
| 5636 | 54-21-2     | Isoetoprolol                           | 300 | 148 | 1.4E-05 | 2.8E-01  | 7.11E-07 | 4.4  | 3.5E-06 | 3.6E-08 | 1.1E-06 | 8.5E-02  | 4.9E-02 | 1.0E-03  | 1.1E-04  | 3.8E-06  | -11.71 | -11.65 | -13.04 | -2.31 | 1.21  | 0.0% | 0.0% |      |
| 5687 | 94667-70-8  | Mizalolan                              | 326 | 201 | 6.8E-07 | 6.79E-01 | 2.11E-04 | 4.4  | 3.5E-06 | 3.4E-08 | 1.1E-06 | 1.7E-02  | 1.0E-02 | 1.4E-04  | 2.2E-05  | 1.1E-03  | -12.12 | -12.02 | -13.19 | -3.67 | 0.59  | 0.0% | 0.0% |      |
| 5658 | 62571-86-2  | Captopril                              | 216 | 134 | 9.7E-04 | 1.44E-01 | 6.9E-06  | 3.3  | 3.5E-06 | 1.2E-07 | 1.1E-06 | 2.0E-02  | 1.1E-02 | 2.9E-02  | 2.7E-03  | 6.8E-02  | -10.30 | -12.04 | -12.94 | -0.94 | 1.04  | 0.0% | 0.0% |      |
| 5980 | 51323-22-3  | Bucindolol                             | 428 | 234 | 1.2E-04 | 4.1E-02  | 1.1E-02  | 13.3 | 3.5E-06 | 4.0E-08 | 1.1E-06 | 2.1E-01  | 1.2E-01 | 3.4E-03  | 2.9E-04  | 7.7E-03  | -11.13 | -11.10 | -12.51 | -1.73 | 0.23  | 0.0% | 0.0% |      |
| 5722 | 53-19-2     | PRAVASTATIN                            | 425 | 243 | 1.1E-14 | 5.13E-03 | 1.3E-03  | 4.3  | 3.5E-06 | 1.1E-06 | 3.5E-07 | 1.2E-01  | 6.8E-02 | 9.3E-04  | 1.5E-05  | 7.5E-05  | -11.44 | -11.31 | -12.21 | -0.64 | 0.0%  | 0.0% | 0.0% |      |
| 5749 | 93-141      | Xenofenoxide Hydrochloride             | 198 | 100 | 3.4E-04 | 1.2E-05  | 2.6E-06  | 14.0 | 3.5E-06 | 1.1E-06 | 3.5E-07 | 4.3E-01  | 2.5E-01 | 6.1E-01  | 5.8E-02  | 1.8E-05  | -9.27  | -9.77  | -12.21 | -0.35 | 0.76  | 0.0% | 0.0% |      |
| 5786 | 123-99-9    | Asiatic Acid                           | 188 | 127 | 1.1E-03 | 3.8E-03  | 5.0E-01  | 4.6  | 3.5E-06 | 1.1E-06 | 3.5E-07 | 1.2E-01  | 6.8E-02 | 9.3E-04  | 1.5E-05  | 7.5E-05  | -11.44 | -11.31 | -12.21 | -0.64 | 0.0%  | 0.0% | 0.0% |      |
| 5636 | 54-21-2     | Isoetoprolol                           | 300 | 148 | 1.4E-05 | 2.8E-01  | 7.11E-07 | 4.4  | 3.5E-06 | 3.6E-08 | 1.1E-06 | 8.5E-02  | 4.9E-02 | 1.0E-03  | 1.1E-04  | 3.8E-06  | -11.71 | -11.65 | -13.04 | -2.31 | 1.21  | 0.   |      |      |



|      |             |                  |     |     |         |         |         |      |         |         |         |         |         |         |         |         |       |        |        |        |       |       |       |      |
|------|-------------|------------------|-----|-----|---------|---------|---------|------|---------|---------|---------|---------|---------|---------|---------|---------|-------|--------|--------|--------|-------|-------|-------|------|
| 6235 | 18691.97-9  | Methanethiazuron | 221 | 165 | 1.4E-04 | 3.1E-02 | 4.5E-02 | 0.0  | 3.5E-06 | 5.7E-08 | 1.1E-07 | 5.8E-01 | 3.3E-01 | 8.8E-08 | 8.3E-03 | 4.8E-01 | -7.77 | -7.95  | 9.41   | -2.78  | 1.42  | 0.00% | 0.00% | 0.0% |
| 6239 | 12928.8-0   | Benzothiazol     | 207 | 160 | 3.1E-05 | 7.4E-02 | 2.5E-02 | 0.0  | 3.5E-06 | 1.3E-05 | 1.1E-07 | 5.8E-01 | 3.3E-01 | 8.8E-08 | 8.3E-03 | 4.8E-01 | -7.77 | -7.95  | 9.41   | -2.78  | 1.42  | 0.00% | 0.00% | 0.0% |
| 6060 | 87674.68-8  | Dimethemethyl    | 276 | 139 | 4.0E-03 | 7.1E-03 | 3.7E-02 | 0.0  | 3.5E-06 | 1.2E-07 | 3.5E-07 | 2.6E-02 | 1.5E-02 | 3.9E-01 | 3.7E-02 | 2.2E-02 | -7.44 | -7.67  | -9.32  | -4.48  | 0.63  | 0.00% | 0.00% | 0.0% |
| 6058 | 57018.49-8  | Tolofomethyl     | 303 | 133 | 8.5E-03 | 1.5E-05 | 5.9E-04 | 0.0  | 3.5E-06 | 1.3E-08 | 3.5E-07 | 2.6E-02 | 1.5E-02 | 3.9E-01 | 3.7E-02 | 2.2E-02 | -7.47 | -7.71  | -9.77  | -5.22  | 1.01  | 0.00% | 0.00% | 0.0% |
| 6003 | 94.757-7    | 2,4-D            | 221 | 109 | 3.1E-05 | 1.5E-02 | 4.2E-02 | 0.0  | 3.5E-06 | 1.7E-05 | 1.1E-07 | 5.8E-01 | 3.3E-01 | 8.8E-08 | 8.3E-03 | 4.8E-01 | -7.77 | -7.95  | 9.41   | -2.78  | 1.42  | 0.00% | 0.00% | 0.0% |
| 6194 | 7786.34-7   | Mevinphos        | 224 | 28  | 4.7E-01 | 1.6E-04 | 5.8E-02 | 0.0  | 3.5E-06 | 3.5E-06 | 1.1E-07 | 5.8E-01 | 3.3E-01 | 8.8E-08 | 8.3E-03 | 4.8E-01 | -7.88 | -9.52  | -11.85 | -4.29  | 1.04  | 0.00% | 0.00% | 0.0% |
| 6133 | 213352.0-2  | Oxamyl           | 219 | 95  | 7.8E-03 | 1.9E-04 | 3.6E-02 | 2.0  | 3.5E-06 | 1.7E-07 | 3.5E-07 | 2.6E-02 | 1.5E-02 | 3.9E-01 | 3.7E-02 | 2.2E-02 | -7.47 | -7.82  | -9.63  | -4.99  | 0.62  | 0.00% | 0.00% | 0.0% |
| 6134 | 17604.35-2  | Benzmyl          | 280 | 222 | 8.1E-08 | 3.8E-02 | 1.7E-02 | 1.0  | 3.5E-06 | 1.1E-07 | 1.1E-07 | 5.8E-01 | 3.3E-01 | 8.8E-08 | 8.3E-03 | 4.8E-01 | -7.77 | -7.95  | 9.41   | -2.78  | 1.42  | 0.00% | 0.00% | 0.0% |
| 6003 | 60207.90-1  | Propiconazole    | 342 | 173 | 4.8E-04 | 3.7E-04 | 1.3E-04 | 0.0  | 3.5E-06 | 5.6E-09 | 3.5E-07 | 2.6E-02 | 1.5E-02 | 3.9E-01 | 3.7E-02 | 2.2E-02 | -7.49 | -7.82  | -9.79  | -5.27  | 0.76  | 0.00% | 0.00% | 0.0% |
| 6055 | 298.04-1    | Diflufenican     | 174 | 173 | 1.7E-01 | 1.1E-04 | 2.2E-04 | 0.0  | 3.5E-06 | 1.7E-05 | 1.1E-07 | 5.8E-01 | 3.3E-01 | 8.8E-08 | 8.3E-03 | 4.8E-01 | -7.77 | -7.95  | 9.41   | -2.78  | 1.42  | 0.00% | 0.00% | 0.0% |
| 6255 | 63.25-2     | Carbaryl         | 201 | 91  | 7.1E-03 | 9.0E-01 | 2.2E-02 | 1.2  | 3.5E-06 | 3.8E-08 | 1.1E-07 | 5.8E-01 | 3.3E-01 | 8.8E-08 | 8.3E-03 | 4.8E-01 | -7.82 | -9.68  | -11.4  | -1.21  | 0.00% | 0.00% | 0.0%  |      |
| 6192 | 249149.1-6  | Chlorfenvinphos  | 235 | -25 | 5.1E-01 | 8.3E-01 | 1.1E-03 | 0.0  | 3.5E-06 | 1.7E-08 | 1.1E-07 | 5.8E-01 | 3.3E-01 | 8.8E-08 | 8.3E-03 | 4.8E-01 | -7.88 | -9.61  | -13.2  | 0.85   | 0.00% | 0.00% | 0.0%  |      |
| 6182 | 886.50-0    | Terbuthiazol     | 241 | 140 | 1.6E-01 | 1.6E-01 | 1.6E-01 | 0.0  | 3.5E-06 | 1.6E-05 | 1.1E-07 | 5.8E-01 | 3.3E-01 | 8.8E-08 | 8.3E-03 | 4.8E-01 | -7.88 | -9.61  | -13.2  | 0.85   | 0.00% | 0.00% | 0.0%  |      |
| 6218 | 7287.36-7   | Monalate         | 240 | 139 | 1.4E-03 | 6.9E-02 | 1.2E-04 | -0.1 | 3.5E-06 | 1.1E-06 | 1.1E-07 | 5.8E-01 | 3.3E-01 | 8.8E-08 | 8.3E-03 | 4.8E-01 | -7.88 | -9.61  | -13.2  | 0.85   | 0.00% | 0.00% | 0.0%  |      |
| 6218 | 1420.07-1   | Dinotef          | 240 | 180 | 1.4E-01 | 2.1E-02 | 4.4E-03 | 4.2  | 3.5E-06 | 1.1E-06 | 1.1E-07 | 5.8E-01 | 3.3E-01 | 8.8E-08 | 8.3E-03 | 4.8E-01 | -7.88 | -9.29  | -11.74 | -3.99  | 1.29  | 0.00% | 0.00% | 0.0% |
| 6220 | 58138.08-2  | Triphenyle       | 107 | 127 | 1.2E-01 | 6.1E-01 | 1.8E-02 | 0.0  | 3.5E-06 | 2.2E-07 | 1.1E-07 | 5.8E-01 | 3.3E-01 | 8.8E-08 | 8.3E-03 | 4.8E-01 | -7.69 | -8.87  | -10.49 | -1.02  | 0.00% | 0.00% | 0.0%  |      |
| 6168 | 111479.01-3 | Propanatiazolap  | 444 | 228 | 2.2E-07 | 2.1E-01 | 3.9E-04 | 0.0  | 3.5E-06 | 1.2E-07 | 3.5E-07 | 2.6E-02 | 1.5E-02 | 3.9E-01 | 3.7E-02 | 2.2E-02 | -7.43 | -8.11  | -10.01 | -3.10  | 0.84  | 0.00% | 0.00% | 0.0% |
| 6119 | 2175.46-3   | Cymazene         | 241 | 152 | 1.0E-05 | 6.8E-02 | 3.2E-02 | 0.0  | 3.5E-06 | 3.2E-09 | 1.1E-07 | 5.8E-01 | 3.3E-01 | 8.8E-08 | 8.3E-03 | 4.8E-01 | -7.46 | -8.27  | -9.59  | -2.27  | 0.00% | 0.00% | 0.0%  |      |
| 6140 | 1512.26-1   | Trietazine       | 230 | 120 | 1.4E-02 | 1.2E-01 | 2.8E-03 | 0.0  | 3.5E-06 | 1.4E-08 | 3.5E-07 | 2.6E-02 | 1.5E-02 | 3.9E-01 | 3.7E-02 | 2.2E-02 | -7.33 | -7.97  | -9.06  | -2.64  | 1.16  | 0.00% | 0.00% | 0.0% |
| 6094 | 66246.98-6  | Permethrinol     | 284 | 132 | 4.8E-03 | 2.8E-02 | 4.7E-04 | 0.0  | 3.5E-06 | 1.2E-07 | 1.1E-07 | 5.8E-01 | 3.3E-01 | 8.8E-08 | 8.3E-03 | 4.8E-01 | -7.96 | -7.73  | -9.42  | -2.40  | 0.69  | 0.00% | 0.00% | 0.0% |
| 6189 | 9546.99-9   | Calafuorin       | 270 | 33  | 4.5E-02 | 5.5E-02 | 9.5E-03 | 0.0  | 3.5E-06 | 5.7E-09 | 1.1E-07 | 5.8E-01 | 3.3E-01 | 8.8E-08 | 8.3E-03 | 4.8E-01 | -8.32 | -8.68  | -9.54  | -1.34  | 1.36  | 0.00% | 0.00% | 0.0% |
| 6045 | 50594.66-6  | Acilfluorin      | 362 | 186 | 5.3E-06 | 1.0E-01 | 1.5E-04 | 2.2  | 3.5E-06 | 3.5E-07 | 1.1E-07 | 5.8E-01 | 3.3E-01 | 8.8E-08 | 8.3E-03 | 4.8E-01 | -8.52 | -8.34  | -10.40 | -2.99  | 1.01  | 0.00% | 0.00% | 0.0% |
| 6059 | 88657.24-3  | Diniconazole     | 236 | 170 | 6.0E-07 | 7.7E-03 | 8.8E-02 | 0.0  | 3.5E-06 | 8.4E-09 | 1.1E-07 | 5.8E-01 | 3.3E-01 | 8.8E-08 | 8.3E-03 | 4.8E-01 | -8.11 | -7.55  | -8.61  | -1.77  | 0.60  | 0.00% | 0.00% | 0.0% |
| 6228 | 1746.81-2   | Molinduram       | 215 | 118 | 1.3E-03 | 1.1E-02 | 1.8E-02 | 0.0  | 3.5E-06 | 2.2E-07 | 1.1E-07 | 5.8E-01 | 3.3E-01 | 8.8E-08 | 8.3E-03 | 4.8E-01 | -7.69 | -7.87  | -9.49  | -1.02  | 0.00% | 0.00% | 0.0%  |      |
| 6031 | 67564.91-4  | Fenpropiophosph  | 303 | 121 | 9.9E-03 | 6.1E-02 | 3.2E-05 | 0.0  | 3.5E-06 | 1.1E-06 | 3.5E-07 | 2.6E-02 | 1.5E-02 | 3.9E-01 | 3.7E-02 | 2.2E-02 | -7.43 | -8.01  | -10.11 | -3.27  | 0.71  | 0.00% | 0.00% | 0.0% |
| 6111 | 116.29-0    | Tetradifon       | 196 | 124 | 1.3E-05 | 2.4E-02 | 1.5E-05 | 0.0  | 3.5E-06 | 2.2E-06 | 3.5E-07 | 2.6E-02 | 1.5E-02 | 3.9E-01 | 3.7E-02 | 2.2E-02 | -7.43 | -8.27  | -9.22  | -0.83  | 0.81  | 0.00% | 0.00% | 0.0% |
| 6138 | 68049.83-2  | Azafenidin       | 338 | 188 | 2.4E-06 | 5.8E-06 | 6.5E-04 | 0.0  | 3.5E-06 | 1.1E-06 | 3.5E-07 | 2.6E-02 | 1.5E-02 | 3.9E-01 | 3.7E-02 | 2.2E-02 | -7.43 | -9.01  | -9.68  | -11.89 | -4.28 | 0.00% | 0.00% | 0.0% |
| 6137 | 101403.68-8 | Flufenuronol     | 489 | 258 | 3.7E-10 | 6.5E-05 | 9.4E-05 | 7.7  | 3.5E-06 | 1.9E-08 | 3.5E-07 | 2.6E-02 | 1.5E-02 | 3.9E-01 | 3.7E-02 | 2.2E-02 | -7.49 | -11.06 | -11.01 | -6.65  | 1.70  | 0.00% | 0.00% | 0.0% |
| 6084 | 709.984-7   | Propanil         | 218 | 131 | 3.8E-03 | 1.6E-01 | 7.6E-02 | -1.0 | 3.5E-06 | 1.0E-07 | 1.1E-07 | 5.8E-01 | 3.3E-01 | 8.8E-08 | 8.3E-03 | 4.8E-01 | -7.31 | -7.57  | -9.22  | -2.14  | 0.44  | 0.00% | 0.00% | 0.0% |
| 6066 | 3347.22-6   | Dithionan        | 296 | 219 | 1.2E-08 | 2.1E-02 | 4.1E-03 | 0.0  | 3.5E-06 | 1.1E-08 | 1.1E-07 | 5.8E-01 | 3.3E-01 | 8.8E-08 | 8.3E-03 | 4.8E-01 | -7.47 | -7.96  | -8.90  | -2.53  | 1.36  | 0.00% | 0.00% | 0.0% |
| 6041 | 2303.17-5   | Tri-azafos       | 96  | 140 | 1.4E-02 | 3.5E-04 | 3.7E-04 | 1.0  | 3.5E-06 | 1.0E-07 | 1.1E-07 | 5.8E-01 | 3.3E-01 | 8.8E-08 | 8.3E-03 | 4.8E-01 | -8.01 | -10.52 | -11.39 | -0.51  | 0.00% | 0.00% | 0.0%  |      |
| 6114 | 60.15-5     | Dimethothate     | 229 | 86  | 5.5E-03 | 3.0E-01 | 5.2E-04 | 0.0  | 3.5E-06 | 6.9E-08 | 1.1E-07 | 5.8E-01 | 3.3E-01 | 8.8E-08 | 8.3E-03 | 4.8E-01 | -7.49 | -8.14  | -9.53  | -2.69  | 1.35  | 0.00% | 0.00% | 0.0% |
| 6211 | 41198.07-8  | Proflufenol      | 174 | 86  | 1.0E-03 | 4.1E-01 | 6.6E-04 | 1.0  | 3.5E-06 | 3.9E-08 | 3.5E-07 | 2.6E-02 | 1.5E-02 | 3.9E-01 | 3.7E-02 | 2.2E-02 | -7.43 | -9.92  | -10.37 | -4.45  | 1.09  | 0.00% | 0.00% | 0.0% |
| 6264 | 114.26-1    | Propanil         | 209 | 69  | 1.1E-01 | 7.8E-02 | 7.9E-01 | 12.2 | 3.5E-06 | 5.4E-07 | 1.1E-07 | 5.8E-01 | 3.3E-01 | 8.8E-08 | 8.3E-03 | 4.8E-01 | -7.39 | -8.12  | -9.11  | -1.02  | 0.00% | 0.00% | 0.0%  |      |
| 6265 | 121552.61-2 | Cyrodifonil      | 225 | 127 | 5.3E-03 | 3.2E-01 | 9.8E-03 | 0.0  | 3.5E-06 | 6.4E-09 | 3.5E-07 | 2.6E-02 | 1.5E-02 | 3.9E-01 | 3.7E-02 | 2.2E-02 | -7.43 | -8.47  | -9.45  | -2.87  | 0.71  | 0.00% | 0.00% | 0.0% |
| 6099 | 1085.98-9   | Dichlorfandil    | 230 | 110 | 4.8E-04 | 6.7E-02 | 5.2E-02 | 0.0  | 3.5E-06 | 2.2E-06 | 3.5E-07 | 2.6E-02 | 1.5E-02 | 3.9E-01 | 3.7E-02 | 2.2E-02 | -7.43 | -8.97  | -9.37  | -1.29  | 0.00% | 0.00% | 0.0%  |      |
| 6075 | 122.34-3    | Semazone         | 127 | 125 | 1.2E-01 | 1.2E-01 | 3.4E-01 | 0.0  | 3.5E-06 | 1.6E-07 | 3.5E-07 | 2.6E-02 | 1.5E-02 | 3.9E-01 | 3.7E-02 | 2.2E-02 | -7.44 | -7.92  | -9.17  | -1.16  | 0.00% | 0.00% | 0.0%  |      |
| 6064 | 2764.72-9   | Diquat           | 184 | 95  | 2.0E-02 | 9.2E-03 | 2.1E-01 | 0.0  | 3.5E-06 | 1.1E-06 | 3.5E-07 | 2.6E-02 | 1.5E-02 | 3.9E-01 | 3.7E-02 | 2.2E-02 | -7.37 | -8.01  | -10.44 | -2.50  | 1.22  | 0.00% | 0.00% | 0.0% |
| 6270 | 41462.42-6  | Bupirimate       | 230 | 121 | 9.9E-03 | 6.1E-02 | 3.2E-05 | 0.0  | 3.5E-06 | 1.1E-06 | 3.5E-07 | 2.6E-02 | 1.5E-02 | 3.9E-01 | 3.7E-02 | 2.2E-02 | -7.43 | -8.01  | -10.44 | -2.50  | 1.22  | 0.00% | 0.00% | 0.0% |
| 6236 | 13360.45-7  | Chlorbromuron    | 294 | 141 | 7.8E-04 | 6.1E-01 | 1.4E-03 | 0.0  | 3.5E-06 | 2.2E-07 | 1.1E-07 | 5.8E-01 | 3.3E-01 | 8.8E-08 | 8.3E-03 | 4.8E-01 | -7.93 | -7.92  | -8.89  | -2.40  | 0.63  | 0.00% | 0.00% | 0.0% |
| 6099 | 766742.0-0  | Flutrafur        | 301 | 164 | 2.7E-06 | 2.7E-02 | 3.3E-02 | 1.0  | 3.5E-06 | 2.2E-09 | 1.1E-07 | 5.8E-01 | 3.3E-01 | 8.8E-08 | 8.3E-03 | 4.8E-01 | -7.22 | -7.46  | -8.44  | -1.94  | 0.74  | 0.00% | 0.00% | 0.0% |
| 6155 | 82538.50-7  | Isofenbut        | 312 | 198 | 3.7E-07 | 2.6E-02 | 3.1E-02 | 0.0  | 3.5E-06 | 1.1E-07 | 1.1E-07 | 5.8E-01 | 3.3E-01 | 8.8E-08 | 8.3E-03 | 4.8E-01 | -7.39 | -8.12  | -9.11  | -1.02  | 0.00% | 0.00% | 0.0%  |      |
| 6057 | 21087.64-9  | Metribuzin       | 214 | 150 | 6.9E-04 | 2.7E-03 | 3.1E-01 | 0.0  | 3.5E-06 | 2.7E-08 | 3.5E-07 | 2.6E-02 | 1.5E-02 | 3.9E-01 | 3.7E-02 | 2.2E-02 | -7.01 | -7.48  | -8.71  | -1.95  | 1.03  | 0.00% | 0.00% | 0.0% |
| 6244 | 33089.41-1  | Amitraz          | 239 | 132 | 3.5E-06 | 6.5E-01 | 3.5E-05 | 0.0  | 3.5E-06 | 3.3E-08 | 1.1E-07 | 5.8E-01 | 3.3E-01 | 8.8E-08 | 8.3E-03 | 4.8E-01 | -7.37 | -8.13  | -9.42  | -2.59  | 0.86  | 0.00% | 0.00% | 0.0% |
| 6240 | 88499.77-6  | Thiobencarb      | 122 | 138 | 1.3E-01 | 1.6E-01 | 7.9E-02 | 0.0  | 3.5E-06 | 1.6E-07 | 3.5E-07 | 2.6E-02 | 1.5E-02 | 3.9E-01 | 3.7E-02 | 2.2E-02 | -7.43 | -8.01  | -10.44 | -2.50  | 1.22  | 0.00% | 0.00% | 0.0% |
| 6152 | 32556.80-5  | Tebutram         | 233 | 96  | 6.1E-02 | 2.2E-01 | 3.3E-03 | -0.8 | 3.5E-06 | 3.5E-07 | 3.5E-07 | 2.6E-02 | 1.5E-02 | 3.9E-01 | 3.7E-02 | 2.2E-02 | -7.43 | -8.38  | -9.43  | -10.40 | -2.89 | 0.00% | 0.00% | 0.0% |
| 6207 | 121.75-1    | Malathion        | 24  | 24  | 3.7E-02 | 3.7E-02 | 3.7E-02 | 0.0  | 3.5E-06 | 1.6E-07 | 3.5E-07 | 2.6E-02 | 1.5E-02 | 3.9E-01 | 3.7E-02 | 2.2E-02 | -7.43 | -8.13  | -9.11  | -1.02  | 0.00% | 0.00% | 0.0%  |      |
| 6232 | 555.37-3    | Neburon          | 275 | 143 | 3.7E-0  |         |         |      |         |         |         |         |         |         |         |         |       |        |        |        |       |       |       |      |

|      |             |                           |     |     |         |         |         |         |         |         |         |         |         |         |         |         |        |        |        |       |       |       |       |      |
|------|-------------|---------------------------|-----|-----|---------|---------|---------|---------|---------|---------|---------|---------|---------|---------|---------|---------|--------|--------|--------|-------|-------|-------|-------|------|
| 6153 | 72178-02-0  | Formesafen                | 439 | 242 | 7.8E-10 | 2.0E+00 | 2.6E+03 | 3.0     | 3.5E-06 | 4.1E-08 | 1.1E-07 | 8.1E+01 | 4.7E+01 | 1.2E+01 | 1.2E-02 | 6.7E+01 | -7.77  | -7.82  | -9.18  | -0.60 | 0.66  | 0.00% | 0.00% | 0.0% |
| 6222 | 2797-51-5   | Quinacemine               | 208 | 126 | 2.3E-04 | 4.2E+01 | 3.2E+01 | 0.0     | 3.5E-06 | 1.1E-06 | 1.1E-06 | 1.2E+01 | 7.0E+00 | 1.8E+00 | 1.7E-03 | 1.0E+01 | -9.32  | -9.84  | -11.96 | -2.60 | 0.14  | 0.00% | 0.00% | 0.0% |
| 6191 | 98886-44-3  | Phoshtizate               | 283 | 87  | 7.7E-04 | 9.5E+01 | 3.0E+02 | 0.0     | 3.5E-06 | 1.1E-06 | 1.1E-06 | 5.8E+01 | 3.4E+01 | 8.8E+00 | 8.4E-03 | 4.8E+01 | -8.83  | -9.24  | -11.31 | -1.98 | 1.38  | 0.00% | 0.00% | 0.0% |
| 6361 | 841-06-5    | Methoprotimne             | 271 | 155 | 1.8E-04 | 1.6E+02 | 1.1E+03 | 0.0     | 3.5E-06 | 3.7E-08 | 1.1E-07 | 5.4E+00 | 3.1E+00 | 8.2E-01 | 7.8E-04 | 4.5E+00 | -8.93  | -8.99  | -10.33 | -1.73 | 0.24  | 0.00% | 0.00% | 0.0% |
| 6380 | 824-78-2    | Sodium paratrisophenolate | 233 | 87  | 5.9E-03 | 1.5E+02 | 3.0E+02 | 14.0    | 3.5E-06 | 1.3E-07 | 6.6E+09 | 3.1E+00 | 1.8E+00 | 4.7E-01 | 4.4E-04 | 2.6E+00 | -5.16  | -9.11  | -10.87 | -1.84 | 0.64  | 0.00% | 0.00% | 0.0% |
| 6232 | 34014-18-1  | Tebuthin                  | 228 | 163 | 5.8E-05 | 1.8E+02 | 6.0E+01 | 1.0     | 3.5E-06 | 5.7E-08 | 3.5E-07 | 5.8E+01 | 3.3E+01 | 8.8E+00 | 8.3E-03 | 4.8E+01 | -7.86  | -8.20  | -9.61  | -0.89 | 0.25  | 0.00% | 0.00% | 0.0% |
| 6370 | 80-33-1     | Chlorfenson               | 303 | 149 | 2.5E-04 | 5.0E+00 | 1.6E+04 | 0.0     | 3.5E-06 | 2.2E-09 | 3.5E-08 | 3.1E+00 | 1.8E+00 | 4.8E-01 | 4.5E-04 | 2.6E+00 | -9.23  | -9.02  | -10.01 | -1.70 | 0.55  | 0.00% | 0.00% | 0.0% |
| 6278 | 705031-7-0  | Metastalar-M              | 279 | 130 | 3.8E-03 | 1.0E+04 | 5.5E+01 | 0.0     | 3.5E-06 | 9.8E-08 | 3.5E-07 | 2.5E+01 | 1.4E+01 | 3.7E+00 | 3.1E-03 | 2.1E+01 | -8.19  | -8.60  | -10.19 | -1.26 | 0.46  | 0.00% | 0.00% | 0.0% |
| 6387 | 131341-86-1 | Flufoxonil                | 248 | 143 | 4.2E-05 | 1.4E+01 | 6.8E+03 | 14.0    | 3.5E-06 | 2.9E-09 | 3.5E-07 | 2.1E+00 | 1.2E+00 | 3.2E-01 | 3.1E-04 | 1.8E+00 | -9.93  | -10.41 | -11.19 | -1.27 | 0.24  | 0.00% | 0.00% | 0.0% |
| 6250 | 5902-51-2   | Tenbal                    | 217 | 164 | 1.7E-05 | 3.9E+02 | 5.6E+01 | 5.0     | 3.5E-06 | 1.5E-07 | 3.5E-07 | 4.6E+01 | 2.7E+01 | 7.0E+00 | 6.7E-03 | 3.9E+01 | -8.22  | -9.60  | -10.57 | -1.36 | 0.41  | 0.00% | 0.00% | 0.0% |
| 6311 | 120833-17-8 | Fenhexamid                | 302 | 188 | 2.6E-07 | 1.3E+00 | 5.2E+03 | 7.7     | 3.5E-06 | 9.8E-09 | 3.5E-07 | 1.1E+01 | 6.5E+00 | 1.7E+00 | 1.6E-03 | 9.4E+00 | -9.93  | -9.84  | -10.50 | -2.43 | 0.80  | 0.00% | 0.00% | 0.0% |
| 6332 | 52151-07-8  | Cypermethrin              | 416 | 82  | 1.7E-05 | 5.9E-02 | 2.4E+00 | 0.0     | 3.5E-06 | 3.9E-08 | 3.5E-07 | 1.1E+01 | 6.4E+00 | 1.7E+00 | 1.6E-03 | 9.2E+00 | -9.08  | -9.25  | -10.48 | -4.11 | 1.19  | 0.00% | 0.00% | 0.0% |
| 6284 | 126484-43-7 | Acidensalar               | 196 | 140 | 1.1E-04 | 3.7E+02 | 2.0E+01 | 1.4     | 3.5E-06 | 3.1E-06 | 1.1E-06 | 2.4E+01 | 1.4E+01 | 3.7E+00 | 3.1E-03 | 2.0E+01 | -9.41  | -9.84  | -11.23 | -1.31 | 0.60  | 0.00% | 0.00% | 0.0% |
| 6313 | 74051-80-2  | Sypermethrin              | 327 | 161 | 1.5E-06 | 4.8E+00 | 9.8E+03 | 4.4     | 3.5E-06 | 6.4E-08 | 1.1E-06 | 1.4E+01 | 8.0E+00 | 2.1E+00 | 2.0E-03 | 1.2E+01 | -8.96  | -9.45  | -10.68 | -1.99 | 0.97  | 0.00% | 0.00% | 0.0% |
| 6271 | 10004-44-1  | Hymenosal                 | 99  | 67  | 8.9E-01 | 3.2E+04 | 5.8E+01 | 7.0     | 3.5E-06 | 3.5E-07 | 1.1E-06 | 3.4E+01 | 2.0E+01 | 5.2E+00 | 4.9E-03 | 2.8E+01 | -8.56  | -8.72  | -10.70 | -1.25 | 0.88  | 0.00% | 0.00% | 0.0% |
| 6371 | 113136-77-9 | Cybenilalar               | 274 | 187 | 1.8E-06 | 4.8E+01 | 6.9E+01 | 3.4     | 3.5E-06 | 2.2E-09 | 3.5E-07 | 3.1E+00 | 1.8E+00 | 4.6E-01 | 4.4E-04 | 2.6E+00 | -9.10  | -9.41  | -10.36 | -1.88 | 0.32  | 0.00% | 0.00% | 0.0% |
| 6166 | 76578-12-6  | Quisalofo                 | 245 | 210 | 5.7E-08 | 1.6E+01 | 3.7E+03 | -0.3    | 3.5E-06 | 1.1E-06 | 3.5E-07 | 6.3E+01 | 3.7E+01 | 9.6E+00 | 9.1E-03 | 5.3E+01 | -8.67  | -8.86  | -11.12 | -1.31 | 0.84  | 0.00% | 0.00% | 0.0% |
| 6262 | 101-21-1    | Chlorophom                | 214 | 65  | 4.5E-01 | 1.5E+02 | 2.0E+03 | 12.3    | 3.5E-06 | 1.2E-06 | 3.5E-07 | 2.2E+01 | 1.2E+01 | 3.4E+00 | 3.2E-03 | 1.9E+01 | -9.89  | -10.49 | -12.32 | 0.17  | 0.00% | 0.00% | 0.0%  |      |
| 6346 | 70224-77-5  | Flucythrinate             | 451 | 75  | 1.1E-05 | 3.0E+03 | 3.6E+06 | 0.0     | 3.5E-06 | 2.1E-08 | 3.5E-07 | 7.3E+00 | 4.2E+00 | 1.1E+00 | 1.0E-03 | 6.1E+00 | -9.25  | -9.43  | -10.56 | -4.04 | 0.77  | 0.00% | 0.00% | 0.0% |
| 6352 | 102851-06-9 | Tau-Flufoxinatar          | 503 | 156 | 2.7E-06 | 1.1E-03 | 6.5E+06 | 0.0     | 3.5E-06 | 1.7E-08 | 3.5E-07 | 7.3E+00 | 4.2E+00 | 1.1E+00 | 1.0E-03 | 6.1E+00 | -9.24  | -9.44  | -10.48 | -0.55 | 1.35  | 0.00% | 0.00% | 0.0% |
| 6319 | 98807-35-3  | Oxidazetyl                | 341 | 186 | 8.8E-06 | 8.5E-01 | 1.3E+04 | 0.0     | 3.5E-06 | 7.8E-09 | 3.5E-07 | 1.1E+01 | 7.0E+00 | 1.8E+00 | 1.7E-03 | 1.0E+01 | -8.84  | -9.88  | -9.98  | -1.37 | 0.81  | 0.00% | 0.00% | 0.0% |
| 6349 | 79538-32-2  | Telluthin                 | 419 | 106 | 4.0E-02 | 3.4E-02 | 1.5E+07 | 0.0     | 3.5E-06 | 1.3E-08 | 3.5E-07 | 7.3E+00 | 4.2E+00 | 1.1E+00 | 1.0E-03 | 6.1E+00 | -8.97  | -9.48  | -10.52 | -4.39 | 1.35  | 0.00% | 0.00% | 0.0% |
| 6388 | 78587-05-0  | Hevynthizar               | 359 | 231 | 5.8E-08 | 2.9E+00 | 3.7E+05 | -0.2    | 3.5E-06 | 1.1E-06 | 3.5E-07 | 1.9E+00 | 1.1E+00 | 2.9E-01 | 2.8E-04 | 1.6E+00 | -10.29 | -10.54 | -12.70 | -2.89 | 0.90  | 0.00% | 0.00% | 0.0% |
| 6408 | 10040-79-0  | Flazusulfuron             | 807 | 226 | 1.8E-07 | 1.2E+01 | 1.7     | 3.5E-06 | 1.4E-08 | 1.1E-07 | 6.9E-01 | 4.0E-01 | 1.0E-01 | 9.8E-05 | 5.7E-01 | 9.23    | -9.75  | -10.80 | -12.98 | 1.98  | 0.00% | 0.00% | 0.0%  |      |
| 6377 | 127277-53-6 | Prohexadione-calcium      | 462 | 87  | 9.9E-03 | 3.2E+03 | 3.0E+02 | 0.0     | 3.5E-06 | 1.3E-07 | 6.6E-09 | 3.1E+00 | 1.8E+00 | 4.7E-01 | 4.4E-04 | 2.6E+00 | -8.71  | -9.04  | -10.81 | -1.37 | 0.77  | 0.00% | 0.00% | 0.0% |
| 6359 | 5244-68-4   | Carboxin                  | 235 | 166 | 1.7E-04 | 4.8E+02 | 3.1E+01 | 0.0     | 3.5E-06 | 2.1E-07 | 1.1E-06 | 6.7E+00 | 3.9E+00 | 1.0E+00 | 9.6E-04 | 5.6E+00 | -9.05  | -9.61  | -11.33 | -1.95 | 0.81  | 0.00% | 0.00% | 0.0% |
| 6414 | 80060-09-9  | Difenthiuron              | 385 | 196 | 1.4E-05 | 4.2E+03 | 5.6E+07 | 1.4     | 3.5E-06 | 1.1E-06 | 1.1E-07 | 4.0E+02 | 2.3E+02 | 6.1E-03 | 5.8E-06 | 3.3E-02 | -11.89 | -12.03 | -14.31 | -4.30 | 0.77  | 0.00% | 0.00% | 0.0% |
| 6302 | 57817-19-1  | Metatylal                 | 279 | 130 | 3.8E-03 | 1.0E+04 | 5.0E+01 | 0.0     | 3.5E-06 | 9.8E-08 | 3.5E-07 | 1.4E+01 | 9.1E+00 | 2.4E+00 | 2.3E-03 | 1.3E+01 | -8.38  | -8.80  | -10.38 | -1.07 | 0.80  | 0.00% | 0.00% | 0.0% |
| 6030 | 15165-67-0  | Dichloroparap             | 235 | 110 | 4.5E-03 | 6.9E+02 | 1.1E+00 | 3.0     | 3.5E-06 | 1.1E-06 | 1.1E-06 | 5.4E+02 | 3.1E+02 | 8.1E+01 | 7.7E-02 | 4.5E+02 | -7.95  | -8.37  | -10.36 | -4.38 | 0.38  | 0.00% | 0.00% | 0.0% |
| 6293 | 122-42-9    | Propham                   | 179 | 36  | 6.3E-01 | 8.5E+02 | 4.6E+02 | 13.2    | 3.5E-06 | 3.5E-07 | 2.2E+01 | 1.3E+01 | 3.4E+00 | 3.2E-03 | 1.9E+01 | -9.77   | -9.61  | -11.10 | -1.84  | 0.49  | 0.00% | 0.00% | 0.0%  |      |
| 6315 | 55615-13-7  | Allevynat-sodium          | 345 | 87  | 9.9E-03 | 2.4E+03 | 3.0E+02 | 0.0     | 3.5E-06 | 1.3E-07 | 6.6E-09 | 1.4E+01 | 8.0E+00 | 2.1E+00 | 2.0E-03 | 1.2E+01 | -8.06  | -8.39  | -10.16 | -1.60 | 0.20  | 0.00% | 0.00% | 0.0% |
| 6401 | 74223-64-6  | Metasulfuron-methyl       | 381 | 241 | 3.8E-09 | 2.6E+01 | 1.0E+02 | 4.1     | 3.5E-06 | 8.8E-08 | 3.5E-07 | 6.9E-01 | 4.0E-01 | 1.0E-01 | 9.8E-05 | 5.7E-01 | -9.77  | -10.17 | -11.70 | -2.36 | 1.82  | 0.00% | 0.00% | 0.0% |
| 6363 | 123132-89-0 | Pymetozine                | 227 | 179 | 1.8E-06 | 8.2E+03 | 7.8E+00 | 0.0     | 3.5E-06 | 2.6E-07 | 1.1E-07 | 5.3E+00 | 3.1E+00 | 8.1E-01 | 7.7E-04 | 4.4E+00 | -8.55  | -9.10  | -11.08 | -1.20 | 0.59  | 0.00% | 0.00% | 0.0% |
| 6325 | 3813-05-6   | Benzalzin                 | 244 | 175 | 6.3E-06 | 1.1E+01 | 1.3E+02 | 2.9     | 3.5E-06 | 1.0E-08 | 3.5E-07 | 1.3E+01 | 7.0E+00 | 1.8E+00 | 1.7E-03 | 1.0E+01 | -8.53  | -8.83  | -9.89  | -4.90 | 0.81  | 0.00% | 0.00% | 0.0% |
| 6251 | 314-40-9    | Bromacil                  | 261 | 176 | 1.5E-05 | 6.8E+02 | 4.8E+01 | 5.1     | 3.5E-06 | 1.1E-06 | 1.1E-06 | 4.6E+01 | 2.7E+01 | 7.0E+00 | 6.7E-03 | 3.9E+01 | -8.78  | -9.29  | -11.40 | -1.30 | 0.73  | 0.00% | 0.00% | 0.0% |
| 6162 | 69806-84-4  | Haloxylof                 | 362 | 176 | 5.8E-05 | 8.8E+00 | 2.4E+03 | 0.0     | 3.5E-06 | 2.2E-09 | 1.1E-06 | 7.1E+01 | 4.1E+01 | 1.1E-01 | 1.0E-02 | 5.9E+01 | -8.18  | -8.52  | -9.33  | -4.50 | 0.84  | 0.00% | 0.00% | 0.0% |
| 6404 | 120923-37-7 | Ametosulfuron             | 369 | 237 | 7.1E-09 | 8.3E+02 | 5.1E-02 | 2.0     | 3.5E-06 | 4.5E-08 | 3.5E-07 | 6.9E-01 | 4.0E-01 | 1.0E-01 | 9.8E-05 | 5.7E-01 | -9.19  | -9.92  | -11.29 | -1.82 | 0.29  | 0.00% | 0.00% | 0.0% |
| 6314 | 99129-52-2  | Clethodim                 | 360 | 178 | 3.5E-07 | 2.1E+00 | 1.6E+04 | 0.3     | 3.5E-06 | 2.6E-08 | 1.1E-06 | 1.4E+01 | 8.0E+00 | 2.1E+00 | 2.0E-03 | 1.2E+01 | -8.88  | -9.41  | -10.41 | -1.31 | 0.36  | 0.00% | 0.00% | 0.0% |
| 6275 | 77732-03-9  | Oxadifl                   | 278 | 173 | 2.3E-05 | 1.6E+04 | 2.5E+02 | 0.0     | 3.5E-06 | 2.5E-07 | 2.5E-07 | 2.0E+01 | 1.7E+01 | 4.6E+00 | 4.3E-03 | 2.5E+01 | -8.16  | -8.69  | -10.70 | -0.57 | 0.22  | 0.00% | 0.00% | 0.0% |
| 6006 | 15845-66-6  | Fosetyl                   | 110 | -11 | 7.4E+00 | 5.5E-06 | 2.0E-01 | 2.4     | 3.5E-06 | 3.5E-06 | 1.1E-06 | 2.5E+03 | 1.4E+03 | 3.8E+02 | 3.6E-01 | 2.1E+03 | -7.00  | -7.78  | -11.08 | 0.36  | 1.01  | 0.00% | 0.00% | 0.0% |
| 6406 | 173159-57-4 | Foramsulfuron             | 452 | 315 | 4.0E-15 | 9.9E+02 | 1.5E-01 | 0.0     | 3.5E-06 | 5.6E-08 | 1.1E-07 | 6.9E-01 | 4.0E-01 | 1.0E-01 | 9.8E-05 | 5.7E-01 | -9.15  | -9.74  | -11.21 | -1.39 | 1.83  | 0.00% | 0.00% | 0.0% |
| 6413 | 126801-58-9 | Ethosulfuron              | 398 | 244 | 4.5E-09 | 5.3E+00 | 1.0E+02 | 2.0     | 3.5E-06 | 2.7E-07 | 3.5E-07 | 6.9E-01 | 4.0E-01 | 1.0E-01 | 9.8E-05 | 5.7E-01 | -9.83  | -10.32 | -11.24 | -1.15 | 1.64  | 0.00% | 0.00% | 0.0% |
| 6378 | 76738-62-0  | Paclobutrazol             | 294 | 150 | 2.2E-06 | 3.9E+01 | 2.3E+03 | 1.5     | 3.5E-06 | 3.5E-07 | 3.5E-07 | 3.1E+00 | 1.8E+00 | 4.7E-01 | 4.4E-04 | 2.6E+00 | -9.69  | -9.83  | -11.80 | -1.65 | 0.38  | 0.00% | 0.00% | 0.0% |
| 6376 | 16673-87-0  | Alfomet                   | 144 | 39  | 2.1E-03 | 2.0E+05 | 5.6E-01 | 2.1     | 3.5E-06 | 6.4E-09 | 3.5E-08 | 3.1E+00 | 1.8E+00 | 4.6E-01 | 4.4E-04 | 2.6E+00 | -8.49  | -8.94  | -10.00 | -0.73 | 0.33  | 0.00% | 0.00% | 0.0% |
| 6288 | 101205-02-1 | Cyflotolol                | 125 | 172 | 5.1E-07 | 1.4E+01 | 7.6E+03 | 4.4     | 3.5E-06 | 6.6E-08 | 1.1E-06 | 2.4E+01 | 1.4E+01 | 3.7E+00 | 3.1E-03 | 2.0E+01 | -8.65  | -9.19  | -10.42 | -0.97 | 0.35  | 0.00% | 0.00% | 0.0% |
| 6298 | 68505-69-1  | Benfureate                | 256 | 134 | 8.7E-03 | 1.7E+02 | 6.3E+02 | 0.0     | 3.5E-06 | 3.5E-06 | 1.1E-06 | 1.9E+01 | 1.1E+01 | 2.9E+00 | 2.8E-03 | 1.6E+01 | -9.78  | -10.17 | -12.35 | -1.94 | 0.79  | 0.00% | 0.00% | 0.0% |
| 6074 | 24579-19-5  | Propanacarb               | 188 | 37  | 3.6E+00 | 7.0E+04 | 1.3E+01 | 9.8     | 3.5E-06 | 3.5E-06 | 1.1E-06 | 2.2E+02 | 1.3E+02 | 3.3E+01 | 3.1E+02 | 1.8E+02 | -9.15  | -9.0   |        |       |       |       |       |      |
